# Supplementary material for: Seed Molecule-Guided Strategy Facilitates the Precise Identification of "Hidden" Polymer Breakdown Products
Source: Research Square preprint supplement (doi:10.21203/rs.3.rs-3997133/v1), 2024-03-14
Supplement: Supplementary file 1 [file 6512b4754cbc9332d681acd3.xlsx]

## Sheet: Overview
Supplementary Datasets
Seed Molecule-Guided Strategy Facilitates the Precise Identification of “Hidden” Polymer Breakdown Products
Changzhi Shi1, Xing Chen1, Jing Yang1, Min Liu2, Ao Guo1, Feng Zhao1, Ailin Zhao1, Xiaojia Chen1, Mengjing Wang3, Fengbang Wang4, Maoyong Song4, Zimeng Wang1, Jianmin Chen1*, Mingliang Fang1,5*
1 Department of Environmental Science and Engineering, Fudan University, Shanghai 200433, China 2 West Coast Metabolomics Center, University of California−Davis, Davis, California 95616, United States 3 Center for Reproductive Sciences, Department of Obstetrics, Gynecology and Reproductive Sciences, University of California, San Francisco (UCSF), San Francisco, California 94143, USA 4 Key Laborat…
*Email: mlfang@ntu.edu.sg; jmchen@fudan.edu.cn
Dataset of Content
	Dataset	Overview	Detailed description
	S1	Polymerization patterns with repeat units	The polymerization patterns of polymers with different monomers and the correspondence of their repeating units and rNLs.
	S2	Polymer oligomer database (PODB) for polymer oligomer screening	Oligomer database for screening based on Polymer Database (www.polymerdatabase.com).
	S3	Additional information about other plastic monomers based on PlasticMAP	Additional information of monomers in plastic production based on PlasticMAP. Xlsx reported in doi 10.1021/acs.est.1c00976.
	S4	Polymer monomers of concern	The list of monomers of potential concern reported in doi 10.1021/acs.est.1c00976.
	S5	Common interference with repeating units in LC-MS	Interferences and contaminants with repeat units in MS
	S6	Oligomer end group database (OEGDB) for congener screening	Possible end groups of oligomers. In order to be concise and correspond to the characteristics of mass spectra, end group was named differ by mass spectrum language
	S7	A supplementary end group database of potential oligomer end structures in the environment (OEGDB-env)	Taking into account the important nucleophiles in environment, there is a supplementary database named OEGDB-env of potential 15 EGs in the environment.
	S8	A supplementary end group database of potential oligomer end structures in biology (OEGDB-bio)	A supplementary OEGDB-bio of potential 30 EGs in organisms was developed.

## Sheet: S1 - Polymirization patterns
Polymerization pattern	Name	Repeat unit of oligomer	rNL	Comments	Representative polymer
	Homopolymer	A	mass(A)		Polylactic acid (PLA)
	Alternating copolymer	A-B	mass(A-B)	A-B can be viewed as repeating units	Poly(caprolactam) （PA66）
	Random copolymer	A/B	mass(A) /mass(A)	The repeating unit could be either A /B	Poly (butyleneadipate-co-terephthalate) (PBAT)
	Block polymer	A/B		The repeating unit could be either A /B	Styrene butadiene styrene block polymer (SBS)
	Graft copolymer	A/B		The repeating unit could be either A /B	Poly(styrene)-graft-poly(methyl methacrylate) (PS-g-PMMA)
* Here A and B represent the residues of two monomers

## Sheet: S2- Polymer oliogomer database
Polymer						Repeat unit			Monomer			End group
Polymerization	Genera	Names	Acronyms	Common names	CurlySMILES	NL SMILES	NL mass	NL formula	Monomer SMILES	Monomer mass	Monomer formula	Differ SMILES	Differ mass	Differ formula
Alternating copolymer	Biodegradable Polyesters	Poly(1,4-butylenesuccinate)	PBS	Poly(1,4-butylenesuccinate),Poly(tetramethylenesuccinate)	O{-}CCCCOC(=O)CCC{n+}(=O)	O{-}CCCCOC(=O)CCC{+}(=O)	172.074	C8H12O4	OC(=O)CCC(=O)O.OCCCCO	190.084	C8H14O5	[H][O].[H]	18.0106	H2O
Homopolymer	Biodegradable Polyesters	Poly(caprolactone)	PCL	Poly(caprolactone),Poly(6-hexanolactone)	C{-}CCCCC(=O)O{n+}	C{-}CCCCC(=O)O{+}	114.068	C6H10O2	O=C1CCCCCO1	132.079	C6H12O3	[H][O].[H]	18.0106	H2O
Homopolymer	Biodegradable Polyesters	Poly(ethyleneadipate)	PEGA	Poly(ethyleneadipate)	O{-}CCOC(=O)CCCCC{n+}(=O)	O{-}CCOC(=O)CCCCC{+}(=O)	172.074	C8H12O4	OC(=O)CCCCC(=O)O.OCCO	190.084	C8H14O5	[H][O].[H]	18.0106	H2O
Alternating copolymer	Biodegradable Polyesters	Poly(ethylenesuccinate)	DEGS	Poly(ethylenesuccinate)	O{-}CCOC(=O)CCC{n+}(=O)	O{-}CCOC(=O)CCC{+}(=O)	144.042	C6H8O4	OC(=O)CCC(=O)O.OCCO	162.053	C6H10O5	[H][O].[H]	18.0106	H2O
Homopolymer	Biodegradable Polyesters	Polyglycolide	PGA	Polyglycolide,Polyglycolicacid	O{-}CC{n+}(=O)	O{-}CC{+}(=O)	192.042	C10H8O4	O=C1OCC(=O)OC1	210.053	C10H10O5	[H][O].[H]	18.0106	H2O
Homopolymer	Biodegradable Polyesters	Polyhydroxybutyrate	P3HB,PHB	Poly(3-hydroxybutyrate),Poly(3-hydroxybutyricacid),Poly(beta-hydroxybutyrate)	C{-}(C)CC(=O)O{n+}	C{-}(C)CC(=O)O{+}	86.0368	C4H6O2	CC1CC(=O)O1	104.047	C4H8O3	[H][O].[H]	18.0106	H2O
Homopolymer	Biodegradable Polyesters	Poly(γ-butyrolactone)	P4HB	Poly(4-hydroxybutyrate),poly(γ-butyrolactone)	O{-}CCC{n+}(=O)	O{-}CCC{+}(=O)	86.0368	C4H6O2	O=C1CCCO1	104.047	C4H8O3	[H][O].[H]	18.0106	H2O
Homopolymer	Biodegradable Polyesters	Polylacticacid	PLA	Polylacticacid,Poly(L-lactide),Poly(D,L-lactide)	C{-}(C)C(=O)O{n+}	C{-}(C)C(=O)O{+}	72.0211	C3H4O2	OC(=O)C(O)C	90.0317	C3H6O3	[H][O].[H]	18.0106	H2O
Homopolymer	Acrylonitrile Copolymers (Nitriles)	Poly(acrylonitrile)	PAN	Poly(acrylonitrile)	C{-}C{n+}(C#N)	C{-}C{+}(C#N)	53.0265	C3H3N	C=CC#N	55.0422	C3H5N		0
Homopolymer	Acrylonitrile Copolymers (Nitriles)	Poly(methacrylonitrile)	PMDETA	Poly(methacrylonitrile)	C{-}C{n+}(C#N)(C)	C{-}C{+}(C#N)(C)	65.0265	C4H3N	CC(=C)C#N	67.0422	C4H5N		0
Homopolymer	Polyacetal (Polyaldehyde)	Polyacetal	POM	Polyacetal,Poly(formaldehyde),Polymethyleneglycol,Delrin®,Celcon®,Duracon®	C{-}O{n+}	C{-}O{+}	30.0106	H2CO	C=O	30.0106	H2CO		0
Homopolymer	Polyacrylamides	Poly(acrylamide)	PAM	Poly(acrylamide)	C{-}C{n+}(C(=O)N)	C{-}C{+}(C(=O)N)	71.0371	C3H5NO	OC(=N)C=C	71.0371	C3H5NO		0
Homopolymer	Polyacrylamides	Poly(N-isopropylacrylamide)	PNIPAM	Poly(N-isopropylacrylamide)	C{-}C{n+}(C(=O)NC(C)C)	C{-}C{+}(C(=O)NC(C)C)	113.084	C6H11NO	C=CC(=O)NC(C)C	113.084	C6H11NO		0
Homopolymer	Polyacrylamides	Poly(N-octylacrylamide)	PnOctA	Poly(N-octylacrylamide)	C{-}C{n+}(C(=O)NCCCCCCCC)	C{-}C{+}(C(=O)NCCCCCCCC)	183.162	C11H21NO	CCCCCCCCNC(=O)C=C	183.162	C11H21NO		0
Homopolymer	Polyacrylamides	Poly(N-tert-butylacrylamide)	PNTBA	Poly(N-tert-butylacrylamide),Poly[N-(2-methyl-2-propanyl)acrylamide]	C{-}C{n+}(C(=O)NC(C)(C)C)	C{-}C{+}(C(=O)NC(C)(C)C)	127.1	C7H13NO	C=CC(=O)NC(C)(C)C	127.1	C7H13NO		0
Homopolymer	Polyacrylamides	Poly(N-phenylacrylamide)	PDPAA	Poly(N-phenylacrylamide)	C{-}C{n+}(C(=O)NC1CCCCC1)	C{-}C{+}(C(=O)NC1CCCCC1)	147.068	C9H9NO	C=CC(=O)NC1CCCCC1	147.068	C9H9NO		0
Homopolymer	Polyacrylamides	Poly(N-sec-butylacrylamide)	sec-BAAm	Poly(N-sec-butylacrylamide)	C{-}C{n+}(C(=O)NC(C)CC)	C{-}C{+}(C(=O)NC(C)CC)	127.1	C7H13NO	C=CC(=O)NC(C)CC	127.1	C7H13NO		0
Homopolymer	Polyacrylates	Poly(acrylicacid)	PAA	Poly(acrylicacid),Acrysol,Acumer	C{-}C{n+}(C(=O)O)	C{-}C{+}(C(=O)O)	72.0211	C3H4O2	OC(=O)C=C	72.0211	C3H4O2		0
Homopolymer	Polyacrylates	Poly(benzylacrylate)	PBA	Poly(benzylacrylate)	C{-}C{n+}(C(=O)OCC1CCCCC1)	C{-}C{+}(C(=O)OCC1CCCCC1)	162.068	C10H10O2	C=CC(=O)OCC1CCCCC1	162.068	C10H10O2		0
Homopolymer	Polyacrylates	Poly(butylacrylate)	PBA	Poly(butylacrylate)	C{-}C{n+}(C(=O)OCCCC)	C{-}C{+}(C(=O)OCCCC)	128.084	C7H12O2	CCCCOC(=O)C=C	128.084	C7H12O2		0
Homopolymer	Polyacrylates	Poly(4-chlorophenylacrylate)	PCPA	Poly(4-chlorophenyl acrylate)	C{-}C{n+}(C(=O)OC1CCC(CC1)Cl)	C{-}C{+}(C(=O)OC1CCC(CC1)Cl)	182.013	C9H7ClO2	C=CC(=O)OC1CCC(CC1)Cl	182.013	C9H7ClO2		0
Homopolymer	Polyacrylates	Poly(2-cyanoethylacrylate)	PCEA	Poly(2-cyanoethylacrylate)	C{-}C{n+}(C(=O)OCCC#N)	C{-}C{+}(C(=O)OCCC#N)	125.048	C6H7NO2	C=CC(=O)OCCC#N	125.048	C6H7NO2		0
Homopolymer	Polyacrylates	Poly(cyanomethylacrylate)	PCMA	Poly(cyanomethylacrylate)	C{-}C{n+}(C(=O)OCC#N)	C{-}C{+}(C(=O)OCC#N)	111.032	C5H5NO2	C=CC(=O)OCC#N	111.032	C5H5NO2		0
Homopolymer	Polyacrylates	Poly(cyclohexylacrylate)	PCA	Poly(cyclohexylacrylate)	C{-}C{n+}(C(=O)OC1CCCCC1)	C{-}C{+}(C(=O)OC1CCCCC1)	154.099	C9H14O2	C=CC(=O)OC1CCCCC1	154.099	C9H14O2		0
Homopolymer	Polyacrylates	Poly(ethylacrylate)	PEA	Poly(ethylacrylate)	C{-}C{n+}(C(=O)OCC)	C{-}C{+}(C(=O)OCC)	100.052	C5H8O2	CCOC(=O)C=C	100.052	C5H8O2		0
Homopolymer	Polyacrylates	Poly(2-ethylhexylacrylate)	PEHeA	Poly(2-ethylhexylacrylate)	C{-}C{n+}(C(=O)OCC(CC)CCCC)	C{-}C{+}(C(=O)OCC(CC)CCCC)	184.146	C11H20O2	CCCCC(COC(=O)C=C)CC	184.146	C11H20O2		0
Homopolymer	Polyacrylates	Poly(hexylacrylate)	PHN	Poly(hexylacrylate)	C{-}C{n+}(C(=O)OCCCCCC)	C{-}C{+}(C(=O)OCCCCCC)	156.115	C9H16O2	CCCCCCOC(=O)C=C	156.115	C9H16O2		0
Homopolymer	Polyacrylates	Poly(isobutylacrylate)	PBA	Poly(isobutylacrylate)	C{-}C{n+}(C(=O)OCC(C)C)	C{-}C{+}(C(=O)OCC(C)C)	128.084	C7H12O2	C=CC(=O)OCC(C)C	128.084	C7H12O2		0
Homopolymer	Polyacrylates	Poly(methylacrylate)	PA	Poly(methylacrylate)	C{-}C{n+}(C(=O)OC)	C{-}C{+}(C(=O)OC)	86.0368	C4H6O2	COC(=O)C=C	86.0368	C4H6O2		0
Homopolymer	Polyacrylates	Poly(propylacrylate)	PPA	Poly(propylacrylate)	C{-}C{n+}(C(=O)OCCC)	C{-}C{+}(C(=O)OCCC)	114.068	C6H10O2	CCCOC(=O)C=C	114.068	C6H10O2		0
Homopolymer	Polyacrylates	Poly(sec-butylacrylate)	PBAK	Poly(sec-butylacrylate)	C{-}C{n+}(C(=O)OC(C)CC)	C{-}C{+}(C(=O)OC(C)CC)	128.084	C7H12O2	CC(OC(=O)C=C)CC	128.084	C7H12O2		0
Homopolymer	Polyacrylates	Poly(tert-butylacrylate)	PtBA	Poly(tert-butylacrylate)	C{-}C{n+}(C(=O)OC(C)(C)C)	C{-}C{+}(C(=O)OC(C)(C)C)	128.084	C7H12O2	C=CC(=O)OC(C)(C)C	128.084	C7H12O2		0
Homopolymer	Polyamides (Polylactams, Polyphthalamides and Polyaramids)	Nylon3-Poly(propiolactam)	PA3	Nylon3,Polyamide3,Poly(3-aminopropanoicacid),Poly(propano-3-lactam)	N{-}C(=O)CC{n+}	N{-}C(=O)CC{+}	71.0371	C3H5NO	C1CNC1=O	89.0477	C3H7NO2	[H][O].[H]	18.0106	H2O
Homopolymer	Polyamides (Polylactams, Polyphthalamides and Polyaramids)	Nylon6-Poly(caprolactam)	PA6	Nylon6,Polyamide6,Poly(caprolactam),Poly(hexano-6-lactam),Poly(6-aminohexanoicacid),Poly(hexamethyleneadipamide)	N{-}CCCCCC{n+}(=O)	N{-}CCCCCC{+}(=O)	113.084	C6H11NO	O=C1CCCCCN1	131.095	C6H13NO2	[H][O].[H]	18.0106	H2O
Homopolymer	Polyamides (Polylactams, Polyphthalamides and Polyaramids)	Nylon8-Polycapryllactam	PA8	Nylon8,Poly(8-aminooctanoicacid),Polycapryllactam,Poly(octano-8-lactam)	N{-}C(=O)CCCCCCC{n+}	N{-}C(=O)CCCCCCC{+}	141.115	C8H15NO	O=C1CCCCCCCN1	159.126	C8H17NO2	[H][O].[H]	18.0106	H2O
Homopolymer	Polyamides (Polylactams, Polyphthalamides and Polyaramids)	Nylon10-Poly(ω-decanamide)	PA10	Nylon10,Poly(ω-decanamide),Poly(decano-10-lactam)	N{-}C(=O)CCCCCCCCC{n+}	N{-}C(=O)CCCCCCCCC{+}	169.147	C10H19NO	NCCCCCCCCCC(=O)O	187.157	C10H21NO2	[H][O].[H]	18.0106	H2O
Homopolymer	Polyamides (Polylactams, Polyphthalamides and Polyaramids)	Nylon11-Poly(ω-undecanamide)	PA11	Nylon11,Polyamide11,Poly(ω-undecanamide),Poly(undecano-11-lactam)	N{-}C(=O)CCCCCCCCCC{n+}	N{-}C(=O)CCCCCCCCCC{+}	183.162	C11H21NO	NCCCCCCCCCCC(=O)O	201.173	C11H23NO2	[H][O].[H]	18.0106	H2O
Homopolymer	Polyamides (Polylactams, Polyphthalamides and Polyaramids)	Nylon12-Poly(ω-dodecanamide)	PA12	Nylon12,Poly(ω-dodecanamide),Poly(dodecano-12-lactam)	N{-}C(=O)CCCCCCCCCCC{n+}	N{-}C(=O)CCCCCCCCCCC{+}	197.178	C12H23NO	NCCCCCCCCCCCC(=O)O	215.189	C12H25NO2	[H][O].[H]	18.0106	H2O
Alternating copolymer	Polyamides (Polylactams, Polyphthalamides and Polyaramids)	Nylon6-6-Poly(hexamethyleneadipamide)	PA66	Nylon6/6,Poly(hexamethyleneadipamide),Poly(hexane-1,6-diyladipamide),Poly(N,N′-hexamethyleneadipinediamide),Ultramid®,Nylatron®,Zytel®,Durethan®,Akromid®	N{-}C(=O)CCCCC(=O)NCCCCCC{n+}	N{-}C(=O)CCCCC(=O)NCCCCCC{+}	226.168	C12H22N2O2	NCCCCCCN.OC(=O)CCCCC(=O)O	244.179	C12H24N2O3	[H][O].[H]	18.0106	H2O
Alternating copolymer	Polyamides (Polylactams, Polyphthalamides and Polyaramids)	Nylon6,10-Poly(hexamethylenesebacamide)	PA6-10	Nylon6-10,Polyamide6-10,&nbsp;Poly(hexamethylenesebacamide)	N{-}C(=O)CCCCCCCCC(=O)NCCCCCC{n+}	N{-}C(=O)CCCCCCCCC(=O)NCCCCCC{+}	298.226	C16H30N2O3	OC(=O)CCCCCCCCC(=O)O.NCCCCCCN	316.236	C16H32N2O4	[H][O].[H]	18.0106	H2O
Alternating copolymer	Polyamides (Polylactams, Polyphthalamides and Polyaramids)	Nylon6,12-Poly(hexamethylenedodecanediamide)	PA6-12	Nylon6-12,Poly(hexamethylenedodecanediamide)	N{-}C(=O)CCCCCCCCCCC(=O)NCCCCCC{n+}	N{-}C(=O)CCCCCCCCCCC(=O)NCCCCCC{+}	326.257	C18H34N2O3	NCCCCCCN.OC(=O)CCCCCCCCCCC(=O)O	344.268	C18H36N2O4	[H][O].[H]	18.0106	H2O
Alternating copolymer	Polyamides (Polylactams, Polyphthalamides and Polyaramids)	Kevlar-Polyaramide	PPTA	Kevlar,Twaron,Polyaramide,Aramide,Poly(p-phenyleneterephthalamide),Poly[(p-phenylenediamine)-alt-(terephthalicacid)]	N{-}C1CCC(CC1)NC(=O)C1CCC(CC1)C{n+}(=O)	N{-}C1CCC(CC1)NC(=O)C1CCC(CC1)C{+}(=O)	238.074	C14H10N2O2	NC1CCC(CC1)N.ClC(=O)C1CCC(CC1)C(=O)Cl	274.051	C14H11N2O2Cl	[Cl].[H]	35.9767	HCl
Alternating copolymer	Polyamides (Polylactams, Polyphthalamides and Polyaramids)	Poly(m-phenyleneterephthalamide),MPDI	PMTA	Poly(m-phenyleneterephthalamide),Nomex,Teijinconex	N{-}C1CC(CCC1)NC(=O)C1CC(CCC1)C{n+}(=O)</td></tr>	N{-}C1CC(CCC1)NC(=O)C1CC(CCC1)C{+}(=O)</td></tr>	238.074	C14H10N2O2	NC1CC(CCC1)N.ClC(=O)C1CC(CCC1)C(=O)Cl	274.051	C14H11N2O2Cl	[Cl].[H]	35.9767	HCl
Alternating copolymer	Polyarylates (Aromatic Polyesters)	Poly(BisphenolAterephthalate)	PBAT	Poly(BisphenolAterephthalate)	C{-}(=O)C1CCC(CC1)C(=O)OC1CCC(CC1)C(C)(C)C2CCC(CC2)O{n+}	C{-}(=O)C1CCC(CC1)C(=O)OC1CCC(CC1)C(C)(C)C2CCC(CC2)O{+}	358.121	C23H18O4	OC(=O)C1CCC(CC1)C(=O)O.OC1CCC(CC1)C(C)(C)C2CCC(CC2)O	376.131	C23H20O5	[Cl].[H]	35.9767	HCl
Alternating copolymer	Polyarylates (Aromatic Polyesters)	Poly(bisphenolAisophthalate)		Poly(bisphenolAisophthalate)	C{-}(=O)C1CC(CCC1)C(=O)OC1CCC(CC1)C(C)(C)C2CCC(CC2)O{n+}	C{-}(=O)C1CC(CCC1)C(=O)OC1CCC(CC1)C(C)(C)C2CCC(CC2)O{+}	358.121	C23H18O4	OC(=O)C1CC(CCC1)C(=O)O.OC1CCC(CC1)C(C)(C)C2CCC(CC2)O	376.131	C23H20O5	[Cl].[H]	35.9767	HCl
Alternating copolymer	Polyaryletherketones (PAEKs)	Poly(etherketone)	PEK	Poly(etherketone),Poly(4,4'-dichlorobenzophenone),Victrex®PEK,Ultrapek®	O{-}C1CCC(CC1)C(=O)C1CCC{n+}(CC1)	O{-}C1CCC(CC1)C(=O)C1CCC{+}(CC1)	240.042	C14H8O4	[O-]C(=O)[O-].[Na+].[Na+].O=C(C1CCC(CC1)Cl)C1CCC(CC1)Cl	276.019	C14H9O4Cl	[Cl].[H]	35.9767	HCl
Alternating copolymer	Polyaryletherketones (PAEKs)	Poly(etheretherketone)	PEEK	Poly(etheretherketone),Poly[(hydroquinone)-alt-(4,4'-difluorobenzophenone)],Poly[(hydroquinone)-alt-(4,4'-dichlorobenzophenone)],Victrex®PEEK,Hostatec®PEEK	O{-}C1CCC(CC1)OC1CCC(CC1)C(=O)C1CCC{n+}(CC1)	O{-}C1CCC(CC1)OC1CCC(CC1)C(=O)C1CCC{+}(CC1)	302.094	C20H14O3	[Na]OC1CCC(CC1)O[Na].O=C(C1CCC(CC1)Cl)C1CCC(CC1)Cl	338.071	C20H15O3Cl	[Cl].[H]	35.9767	HCl
Alternating copolymer	Polyaryletherketones (PAEKs)	Poly(etherketoneketone)	PEKK	Poly(etheretherketone),Cypec®PEKK,Oxpekk®PEKK,Kepstan®	C1{-}CCC(CC1)OC1CCC(CC1)C(=O)C1CCC(CC1)C(=O){n+}	C1{-}CCC(CC1)OC1CCC(CC1)C(=O)C1CCC(CC1)C(=O){+}	300.079	C20H12O3	C1CC(CCC1C(=O)Cl)C(=O)Cl.C1CCC(CC1)OC2CCCCC2	336.055	C20H13O3Cl	[Cl].[H]	35.9767	HCl
Alternating copolymer	Polyaryletherketones (PAEKs)	Poly(ethyleneketone)		Poly(ethyleneketone),Carilon®,Poketone™,Akrotek®PK	C{-}CC{n+}(=O)	C{-}CC{+}(=O)	56.0262	C3H4O	C=C.[C-]#[O+]	56.0262	C3H4O		0
Alternating copolymer	Aliphatic Polyketones	Poly(propyleneketone)	PPK	Poly(propyleneketone),Carilon®,Poketone™,Akrotek®PK	C{-}C(C)C{n+}(=O)	C{-}C(C)C{+}(=O)	70.0419	C4H6O	CC=C.[C-]#[O+]	70.0419	C4H6O		0
Alternating copolymer	Poly(ether)sulfones	Poly(etherethersulfone)	PEES	Poly(etherethersulfone),Poly(1,4-phenyleneetherethersulfone),Poly{[bis(4-chlorophenyl)sulfone]-alt-[hydroquinone]},Radel®	C1{-}CCC(CC1)S(=O)(=O)C1CCC(CC1)OC1CCC(CC1)O{n+}	C1{-}CCC(CC1)S(=O)(=O)C1CCC(CC1)OC1CCC(CC1)O{+}	326.061	C18H14O4S	OC1CCC(CC1)O.ClC1CCC(CC1)S(=O)(=O)C1CCC(CC1)Cl	362.038	C18H15O4SCl	[Cl].[H]	35.9767	HCl
Alternating copolymer	Poly(ether)sulfones	Poly(ethersulfone)	PES	Poly(ethersulfone),Poly(1,4-phenyleneether-sulfone),Victrex®100P&amp;200P,Ultrason®E,Poly{[bis(4-chlorophenyl)sulfone]-alt-[bis(4-hydroxyphenyl)sulfone]}	O{-)C1CCC(CC1)S(=O)(=O)C1CCC{n+}(CC1)	O{-}C1CCC(CC1)S(=O)(=O)C1CCC{+}(CC1)	234.035	C12H10O3S	ClC1CCC(CC1)S(=O)(=O)C1CCC(CC1)Cl.OC1CCC(CC1)S(=O)(=O)C1CCC(CC1)O	270.012	C12H11O3SCl	[Cl].[H]	35.9767	HCl
Alternating copolymer	Poly(ether)sulfones	Poly(phenylsulfone)	PPSU,PPSF	Poly(phenylsulfone),Poly(1,4-biphenyletherethersulfone)	C1{-}CCC(CC1)S(=O)(=O)C1CCC(CC1)OC1CCC(CC1)C1CCC(CC1)O{n+}	C1{-}CCC(CC1)S(=O)(=O)C1CCC(CC1)OC1CCC(CC1)C1CCC(CC1)O{+}	402.093	C24H18O4S	OC1CCC(CC1)C1CCC(CC1)O.ClC1CCC(CC1)S(=O)(=O)C1CCC(CC1)Cl	438.069	C24H19O4SCl	[Cl].[H]	35.9767	HCl
Alternating copolymer	Poly(ether)sulfones	BisphenolAPolysulfone	PSU,PSF	BisphenolAPolysulfone,Poly{[bis(4-chlorophenyl)sulfone]-alt-[bisphenol-A]},BisphenolA-bis(chlorophenyl)sulfonecopolymer,Udel®P1700&amp;P3500	O{-}C1CCC(CC1)C(C)(C)C1CCC(CC1)OC1CCC(CC1)S(=O)(=O)C1CCC{n+}(CC1)	O{-}C1CCC(CC1)C(C)(C)C1CCC(CC1)OC1CCC(CC1)S(=O)(=O)C1CCC{+}(CC1)	444.14	C27H24O4S	CC(C1CCC(CC1)O)(C1CCC(CC1)O)C.ClC1CCC(CC1)S(=O)(=O)C1CCC(CC1)Cl	480.116	C27H25O4SCl	[Cl].[H]	35.9767	HCl
Alternating copolymer	Polycarbonates	Poly(bisphenolAcarbonate)	PBAC	Poly(bisphenol A carbonate), Lexan™, Makrolon®	C{-}(=O)OC1CCC(CC1)C(C)(C)C2CCC(CC2)O{n+}	C{-}(=O)OC1CCC(CC1)C(C)(C)C2CCC(CC2)O{+}	254.094	C16H14O3	CC(C1CCC(CC1)O)(C1CCC(CC1)O)C.ClC(=O)Cl	290.071	C16H15O3Cl	[Cl].[H]	35.9767	HCl
Alternating copolymer	Polycarbonates	Poly(bisphenolBcarbonate)	PBBC	Poly(bisphenolBcarbonate)	C{-}(=O)OC1CCC(CC1)C(CC)(C)C2CCC(CC2)O{n+}	C{-}(=O)OC1CCC(CC1)C(CC)(C)C2CCC(CC2)O{+}	268.11	C17H16O3	CCC(C1CCC(CC1)O)(C1CCC(CC1)O)C.ClC(=O)Cl	304.087	C17H17O3Cl	[Cl].[H]	35.9767	HCl
Alternating copolymer	Polycarbonates	Poly(bisphenolFcarbonate)	PBFC	Poly(bisphenolFcarbonate),Poly[methanebis(4-phenyl)carbonate]	C{-}(=O)OC1CCC(CC1)CC2CCC(CC2)O{n+}	C{-}(=O)OC1CCC(CC1)CC2CCC(CC2)O{+}	214.063	C13H10O3	OC1CCC(CC1)CC1CCC(CC1)O.ClC(=O)Cl	250.04	C13H11O3Cl	[Cl].[H]	35.9767	HCl
Alternating copolymer	Polycarbonates	Poly(ethylenecarbonate)	PC	Poly(2,6,3',5'-tetrachlorobisphenolAcarbonate)	C{-}COC(=O)O{n+}	C{-}COC(=O)O{+}	250.063	C16H10O3	O=C=O.C1CO1	286.04	C16H11O3Cl	[Cl].[H]	35.9767	HCl
Alternating copolymer	Polycarbonates	Poly(4,4'-thiodiphenylenecarbonate)		Poly(4,4'-thiodiphenylenecarbonate)	O{-}C(=O)OC1CCC(CC1)SC1CCC{n+}(CC2)	O{-}C(=O)OC1CCC(CC1)SC1CCC{+}(CC2)	244.019	C13H8O3S	OC1CCC(CC1)SC1CCC(CC1)O.ClC(=O)Cl	280	C13H9O3ClS	[Cl].[H]	35.9767	HCl
Homopolymer	Polychloroolefins(PVC and other Chloropolymers)	Poly(vinylchloride)	PVC	Poly(vinylchloride),Tygon®,Vestolit®,Solvic®,Geon™,Plioflex®,Pevikon™,OxyVinyls®,Formolon®,Benvic®	C{-}(Cl)C{n+}	C{-}(Cl)C{+}	61.9923	C2H3Cl	ClC=C	61.9923	C2H3Cl		0
Homopolymer	Polychloroolefins(PVC and other Chloropolymers)	Poly(vinylidenechloride)	PVDC	Poly(vinylidenechloride),Saran™	C{-}(Cl)(Cl)C{n+}	C{-}(Cl)(Cl)C{+}	95.9534	C2H2Cl2	ClC(=C)Cl	95.9534	C2H2Cl2		0
Homopolymer	Polycyanocrylates	Poly(methylcyanoacrylate)	CA	Cyanoacrylate,Poly(methylcyanoacrylate),Poly(methylα‐cyanoacrylates)	C{-}C{n+}(C#N)(C(=O)OC)	C{-}C{+}(C#N)(C(=O)OC)	111.032	C5H5NO2	COC(=O)C(=C)C#N	111.032	C5H5NO2		0
Homopolymer	Polycyanocrylates	Poly(ethylcyanoacrylate)	PECA	Poly(ethylcyanoacrylate),Poly(ethylα-cyanoacrylates)	C{-}C{n+}(C#N)(C(=O)OCC)	C{-}C{+}(C#N)(C(=O)OCC)	125.048	C6H7NO2	CCOC(=O)C(=C)C#N	125.048	C6H7NO2		0
Homopolymer	Polycyanocrylates	Poly(butylcyanoacrylate)	PBCA	Poly(butylcyanoacrylate)	C{-}C{n+}(C#N)(C(=O)OCCCC)	C{-}C{+}(C#N)(C(=O)OCCCC)	153.079	C8H11NO2	CCCCOC(=O)C(=C)C#N	153.079	C8H11NO2		0
Homopolymer	Polydienes (Diene Elastomers, Synthetic Rubbers)	Poly(1,2-butadiene)		Poly(1,2-butadiene)	C{-}C{n+}(C=C)	C{-}C{+}(C=C)	54.047	C4H6	C=CC=C	54.047	C4H6		0
Homopolymer	Polydienes (Diene Elastomers, Synthetic Rubbers)	Poly(1,4-butadiene)	IR	Poly(1,4-butadiene)	C{-}C=CC{n+}	C{-}C=CC{+}	54.047	C4H6	C=CC=C	54.047	C4H6		0
Homopolymer	Polydienes (Diene Elastomers, Synthetic Rubbers)	Polyisoprene	PI	Polyisoprene,Poly(1-methyl-1-butenylene)	C{-}(C)=CCC{n+}	C{-}(C)=CCC{+}	68.0626	C5H8	CC=CC=C	68.0626	C5H8		0
Homopolymer	Polydienes (Diene Elastomers, Synthetic Rubbers)	Poly(1,4-pentadiene)		Poly(1,4-pentadiene)	C{-}C=CC{n+}(C)	C{-}C=CC{+}(C)	68.0626	C5H8	C=CCC=C	68.0626	C5H8		0
Homopolymer	Polydienes (Diene Elastomers, Synthetic Rubbers)	Polychloroprene	CR	Polychloroprene,Neoprene®,Butachlor®,Skyprene®,Baypren®	C{-}C(Cl)=CC{n+}	C{-}C(Cl)=CC{+}	88.008	C4H5Cl	C=CC(=C)Cl	88.008	C4H5Cl		0
Homopolymer	Polydienes (Diene Elastomers, Synthetic Rubbers)	Poly(1-bromo-1-butenylene)		Poly(1-bromo-1-butenylene)	C{-}(Br)=CCC{n+}	C{-}(Br)=CCC{+}	131.957	C4H5Br	BrC=CC=C	131.957	C4H5Br		0
Homopolymer	Polyelectrolytes	Poly(acrylicacid)		Poly(acrylicacid),Acrysol,Acumer	C{-}C{n+}(C(=O)O)	C{-}C{+}(C(=O)O)	72.0211	C3H4O2	OC(=O)C=C	72.0211	C3H4O2		0
Homopolymer	Polyelectrolytes	Poly(methacrylicacid)	PMAA	Poly(methacrylicacid)	C{-}C{n+}(C)(C(=O)O)	C{-}C{+}(C)(C(=O)O)	86.0368	C4H6O2	CC(=C)C(=O)O	86.0368	C4H6O2		0
Homopolymer	Polyelectrolytes	Poly(acrylamide)		Poly(acrylamide)	C{-}C{n+}(C(=O)N)	C{-}C{+}(C(=O)N)	71.0371	C3H5NO	OC(=N)C=C	71.0371	C3H5NO		0
Alternating copolymer	Polyepoxides (Epoxies)	EpoxyorPhenoxyResin	Epoxy,Phenoxy	Bisphenol-Adiglycidyletherepoxyorphenoxyresin,Poly(BisphenolA-co-epichlorohydrin)	C{-}C(O)COC1CCC(CC1)C(C)(C)C2CCC(CC2)O(n+}	C{-}C(O)COC1CCC(CC1)C(C)(C)C2CCC(CC2)O{+}	268.146	C18H20O2	CC(C)(C1CCC(CC1)O)C2CCC(CC2)O.C1C(O1)CCl	286.157	C18H20O3	[H][O].[H]	18.0106	H2O
Alternating copolymer	Polyepoxides (Epoxies)	Poly(bis-Adiglycidylether-alt-ethylenediamine)		Poly(bisphenol-Adiglycidylether-alt-ethylenediamine),DGEBA-EdamineEpoxy	C{-}C(O)COC1CCC(CC1)C(C)(C)C2CCC(CC2)OCC(O)CNCCN{n+}	C{-}C(O)COC1CCC(CC1)C(C)(C)C2CCC(CC2)OCC(O)CNCCN{+}	400.236	C23H32N2O4	CC(C1CCC(CC1)OCC1OC1)(C1CCC(CC1)OCC1OC1)C.NCCN	400.236	C23H32N2O4		0
Alternating copolymer	Polyepoxides (Epoxies)	Poly(bisphenol-Adiglycidylether-alt-1,6-diaminohexane)		Poly(bisphenol-A diglycidyl ether-alt-1,6-diamino hexane), DGEBA-Hexanediamine Epoxy	C{-}C(O)COC1CCC(CC1)C(C)(C)C2CCC(CC2)OCC(O)CNCCCCCCN{n+}	C{-}C(O)COC1CCC(CC1)C(C)(C)C2CCC(CC2)OCC(O)CNCCCCCCN{+}	456.299	C27H40N2O4	CC(C1CCC(CC1)OCC1OC1)(C1CCC(CC1)OCC1OC1)C.NCCCCCCN	456.299	C27H40N2O4		0
Homopolymer	Polyesters	Poly(bisphenolAisophthalate)		Poly(bisphenolAisophthalate)	C{-}(=O)C1CCC(CC1)C(=O)OC1CCC(CC1)C(C)(C)C2CCC(CC2)O{n+}	C{-}(=O)C1CCC(CC1)C(=O)OC1CCC(CC1)C(C)(C)C2CCC(CC2)O{+}	358.121	C23H18O4	OC(=O)C1CC(CCC1)C(=O)O.OC1CCC(CC1)C(C)(C)C2CCC(CC2)O	376.131	C23H20O5	[H][O].[H]	18.0106	H2O
Homopolymer	Polyesters	Poly(BisphenolAterephthalate)		Poly(BisphenolAterephthalate)	O{-}C(=O)C1CC(CCC1)C(=O)OCCCC{n+}	O{-}C(=O)C1CC(CCC1)C(=O)OCCCC{+}	358.121	C23H18O4	OC(=O)C1CCC(CC1)C(=O)O.OC1CCC(CC1)C(C)(C)C2CCC(CC2)O	376.131	C23H20O5	[H][O].[H]	18.0106	H2O
Alternating copolymer	Polyesters	Poly(tetramethyleneisophthalate)		Poly(tetramethyleneisophthalate),Poly(1,4-butyleneisophthalate)	O{-}CCCCOC(=O)CCCCCCCCC{n+}(=O)	O{-}CCCCOC(=O)CCCCCCCCC{+}(=O)	220.074	C12H12O4	OC(=O)C1CCCC(C1)C(=O)O.OCCCCO	238.084	C12H14O5	[H][O].[H]	18.0106	H2O
Alternating copolymer	Polyesters	Poly(1,4-butylenesebacate)	PBS	Poly(1,4-butylenesebacate),Poly(tetramethylenesebacate)	O{-}CCCCOC(=O)CCC{n+}(=O)	O{-}CCCCOC(=O)CCC{+}(=O)	256.167	C14H24O4	OC(=O)CCCCCCCCC(=O)O.OCCCCO	274.178	C14H26O5	[H][O].[H]	18.0106	H2O
Alternating copolymer	Polyesters	Poly(1,4-butylenesuccinate)		Poly(1,4-butylenesuccinate),Poly(tetramethylenesuccinate)	O{-}C(=O)C1CCC(CC1)C(=O)OCCCC{n+}	O{-}C(=O)C1CCC(CC1)C(=O)OCCCC{+}	172.074	C8H12O4	OC(=O)CCC(=O)O.OCCCCO	190.084	C8H14O5	[H][O].[H]	18.0106	H2O
Alternating copolymer	Polyesters	Poly(butyleneterephthalate)	PBT	Poly[(tetramethyleneterephthalate),Poly(1,4-butyleneterephthalate),Poly[(butane-1,4-diol)-alt-(terephthalicacid)]	O{-}CCOC(=O)CCCCCCCCC{n+}(=O)	O{-}CCOC(=O)CCCCCCCCC{+}(=O)	220.074	C12H12O4	OC(=O)C1CCC(CC1)C(=O)O.OCCCCO	238.084	C12H14O5	[H][O].[H]	18.0106	H2O
Alternating copolymer	Polyesters	Poly(ethylenesebacate)	PES	Poly(ethylenesebacate),Poly(ethyleneglycolsebacate)	C{-}CCCCC(=O)O{n+}	C{-}CCCCC(=O)O{+}	228.136	C12H20O4	OC(=O)CCCCCCCCC(=O)O.OCCO	246.147	C12H22O5	[H][O].[H]	18.0106	H2O
Homopolymer	Polyesters	Poly(caprolactone)		Poly(caprolactone),Poly(6-hexanolactone)	O{-}CCOC(=O)CCCCC{n+}(=O)	O{-}CCOC(=O)CCCCC{+}(=O)	114.068	C6H10O2	O=C1CCCCCO1	132.079	C6H12O3	[H][O].[H]	18.0106	H2O
Alternating copolymer	Polyesters	Poly(ethyleneadipate)		Poly(ethyleneadipate)	O{-}C(=O)C1CC(CCC1)C(=O)OCC{n+}	O{-}C(=O)C1CC(CCC1)C(=O)OCC{+}	172.074	C8H12O4	OC(=O)CCCCC(=O)O.OCCO	190.084	C8H14O5	[H][O].[H]	18.0106	H2O
Alternating copolymer	Polyesters	Poly(ethyleneisophthalate)		Poly(ethyleneisophthalate)	O{-}CCOC(=O)C1CCC2C(C1)CCC(C2)C{n+}(=O)	O{-}CCOC(=O)C1CCC2C(C1)CCC(C2)C{+}(=O)	192.042	C10H8O4	OC(=O)C1CCCC(C1)C(=O)O.OCCO	210.053	C10H10O5	[H][O].[H]	18.0106	H2O
Alternating copolymer	Polyesters	Poly(ethylene2,6-naphthalate)	PEN	Poly(ethylene2,6-naphthalate)	O{-}C(=O)C1C(CCCC1)C(=O)OCC{n+}	O{-}C(=O)C1C(CCCC1)C(=O)OCC{+}	242.058	C14H10O4	OC(=O)C1CCC2C(C1)CCC(C2)C(=O)O.OCCO	260.068	C14H12O5	[H][O].[H]	18.0106	H2O
Alternating copolymer	Polyesters	Poly(ethylenephthalate)	PEP	Poly(ethylenephthalate)	O{-}C(=O)C1CCC(CC1)C(=O)OCC{n+}	O{-}C(=O)C1CCC(CC1)C(=O)OCC{+}	192.042	C10H8O4	OC(=O)C1CCCCC1C(=O)O.OCCO	210.053	C10H10O5	[H][O].[H]	18.0106	H2O
Alternating copolymer	Polyesters	Poly(ethyleneterephthalate)	PET	Poly(ethyleneterephthalate)	O{-}CC{n+}(=O)	O{-}CC{+}(=O)	192.042	C10H8O4	OC(=O)C1CCC(CC1)C(=O)O.OCCO	210.053	C10H10O5	[H][O].[H]	18.0106	H2O
Homopolymer	Polyesters	Polyglycolide		Polyglycolide,Polyglycolicacid	O{-}CCCCCCOC(=O)CCCCCCCCC{n+}(=O)	O{-}CCCCCCOC(=O)CCCCCCCCC{+}(=O)	192.042	C10H8O4	O=C1OCC(=O)OC1	210.053	C10H10O5	[H][O].[H]	18.0106	H2O
Alternating copolymer	Polyesters	Poly(1,6-hexylenesebacate)	HMS	Poly(1,6-hexylenesebacate),Poly(hexamethylenesebacate)	C{-}(C)CC(=O)O{n+}	C{-}(C)CC(=O)O{+}	284.199	C16H28O4	OC(=O)CCCCCCCCC(=O)O.OCCCCCCO	302.209	C16H30O5	[H][O].[H]	18.0106	H2O
Homopolymer	Polyesters	Polyhydroxybutyrate		Poly(3-hydroxybutyrate),Poly(3-hydroxybutyricacid),Poly(beta-hydroxybutyrate)	C{-}(C)C(=O)O{n+}	C{-}(C)C(=O)O{+}	86.0368	C4H6O2	CC1CC(=O)O1	104.047	C4H8O3	[H][O].[H]	18.0106	H2O
Alternating copolymer	Polyesters	Poly(trimethyleneterephthalate)	PTT	Poly(trimethyleneterephthalate)	O{-}C(=O)C1CCC(CC1)C(=O)OCCC{n+}	O{-}C(=O)C1CCC(CC1)C(=O)OCCC{+}	206.058	C11H10O4	OC(=O)C1CCC(CC1)C(=O)O.OCCCO	224.068	C11H12O5	[H][O].[H]	18.0106	H2O
Homopolymer	Polyfluoroolefins (Fluoropolymers)	Poly(tetrafluoroethylene)	PTFE	Poly(tetrafluoroethylene),Poly(tetrafluoroethene),Teflon®,Fluon®,Dyneon™,Hyflon®	C{-}(F)(F)C{n+}(F)(F)	C{-}(F)(F)C{+}(F)(F)	99.9936	C2F6	FC(=C(F)F)F	99.9936	C2F4		0
Homopolymer	Polyfluoroolefins (Fluoropolymers)	Poly(vinylfluoride)	PVF	Poly(vinylfluoride),Tedlar®	C{-}(F)C{n+}	C{-}(F)C{+}	46.0219	C2H3F	FC=C	46.0219	C2H3F		0
Homopolymer	Polyfluoroolefins (Fluoropolymers)	Poly(vinylidenefluoride)	PVDF	Poly(vinylidenefluoride),Solef®,Neoflon®,Foraflon®,Soltex®,Tecaflon®,Kynar®	C{-}(F)(F)C{n+}	C{-}(F)(F)C{+}	64.0125	C2H2F2	FC(=C)F	64.0125	C2H2F2		0
Homopolymer	Polyfluoroolefins (Fluoropolymers)	Poly(chlorotrifluoroethylene)	PCTFE,PTFCE	Poly(chlorotrifluoroethylene)	C{-}(Cl)(F)C{n+}(F)(F)	C{-}(Cl)(F)C{+}(F)(F)	115.964	C2ClF3	FC(=C(F)F)Cl	115.964	C2ClF3		0
Homopolymer	Polyglycols (Aliphatic Polyethers)	Poly(epichlorohydrin)	epoxy	Poly(epichlorohydrin)	O{-}CC{n+}(CCl)	O{-}CC{+}(CCl)	92.0029	C3H5ClO	ClCC1CO1	92.0029	C3H5ClO		0
Homopolymer	Polyglycols (Aliphatic Polyethers)	Poly(ethyleneglycol)	PEO,POE,PEG	Poly(ethyleneglycol),Carbowax®	O{-}CC(n+}	O{-}CC(+}	44.0262	C2H4O	O1CC1	44.0262	C2H4O		0
Homopolymer	Polyglycols (Aliphatic Polyethers)	Polyacetal		Polyacetal,Poly(formaldehyde),Polymethyleneglycol,Delrin®,Celcon®,Duracon®	C{-}O{n+}	C{-}O{+}	30.0106	H2CO	C=O	30.0106	H2CO		0
Homopolymer	Polyglycols (Aliphatic Polyethers)	Poly(propyleneglycol)	PPG	Poly(propyleneglycol)	O{-}C(C)C{n+}	O{-}C(C)C{+}	58.0419	C3H6O	CC1CO1	58.0419	C3H6O		0
Homopolymer	Polyglycols (Aliphatic Polyethers)	Poly(tetrahydrofuran)	PTMO,PTMEG	Poly(tetrahydrofuran),Poly(tetramethyleneglycol),PolyTHF®	C{-}CCCO{n+}	C{-}CCCO{+}	72.0575	C4H8O	C1CCCO1	72.0575	C4H8O		0
Homopolymer	Polyglycols (Aliphatic Polyethers)	Poly(trimethyleneglycol)	PTMG	Poly(trimethyleneglycol)	C{-}CCO{n+}	C{-}CCO{+}	58.0419	C3H6O	C1CCO1	58.0419	C3H6O		0
Homopolymer	Polyglycols (Aliphatic Polyethers)	Poly(epichlorohydrin)		Poly(epichlorohydrin)	O{-}CC{n+}(CCl)	O{-}CC{+}(CCl)	92.0029	C3H5ClO	ClCC1CO1	92.0029	C3H5ClO		0
Homopolymer	Polyglycols (Aliphatic Polyethers)	Poly(ethyleneglycol)		Poly(ethyleneglycol),Carbowax®	O{-}CC(n+}	O{-}CC(+}	44.0262	C2H4O	O1CC1	44.0262	C2H4O		0
Homopolymer	Polyglycols (Aliphatic Polyethers)	Polyacetal		Polyacetal,Poly(formaldehyde),Polymethyleneglycol,Delrin®,Celcon®,Duracon®	C{-}O{n+}	C{-}O{+}	30.0106	H2CO	C=O	30.0106	H2CO		0
Homopolymer	Polyglycols (Aliphatic Polyethers)	Poly(propyleneglycol)		Poly(propyleneglycol)	O{-}C(C)C{n+}	O{-}C(C)C{+}	58.0419	C3H6O	CC1CO1	58.0419	C3H6O		0
Homopolymer	Polyglycols (Aliphatic Polyethers)	Poly(tetrahydrofuran)		Poly(tetrahydrofuran),Poly(tetramethyleneglycol),PolyTHF®	C{-}CCCO{n+}	C{-}CCCO{+}	72.0575	C4H8O	C1CCCO1	72.0575	C4H8O		0
Homopolymer	Polyglycols (Aliphatic Polyethers)	Poly(trimethyleneglycol)		Poly(propyleneglycol)	C{-}CCO{n+}	C{-}CCO{+}	58.0419	C3H6O	C1CCO1	58.0419	C3H6O		0
Homopolymer	Polymethacrylates	Poly(benzylmethacrylate)	PBnMA	Poly(benzylmethacrylate)	C{-}C{n+}(C)(C(=O)OCC1CCCCC1)	C{-}C{+}(C)(C(=O)OCC1CCCCC1)	176.084	C11H12O2	O=C(C(=C)C)OCC1CCCCC1	176.084	C11H12O2		0
Homopolymer	Polymethacrylates	Poly(butylmethacrylate)	PBMA	Poly(butylmethacrylate)	C{-}C{n+}(C)(C(=O)OCCCC)	C{-}C{+}(C)(C(=O)OCCCC)	142.099	C8H14O2	CCCCOC(=O)C(=C)C	142.099	C8H14O2		0
Homopolymer	Polymethacrylates	Poly(cyclohexylmethacrylate)	PCHMA	Poly(cyclohexylmethacrylate)	C{-}C{n+}(C)(C(=O)OC1CCCCC1)	C{-}C{+}(C)(C(=O)OC1CCCCC1)	168.115	C10H16O2	O=C(C(=C)C)OC1CCCCC1	168.115	C10H16O2		0
Homopolymer	Polymethacrylates	Poly(dodecylmethacrylate)	PLMA	Poly(dodecylmethacrylate),Poly(laurylmethacrylate)	C{-}C{n+}(C)(C(=O)OCCCCCCCCCCCC)	C{-}C{+}(C)(C(=O)OCCCCCCCCCCCC)	254.225	C16H30O2	CCCCCCCCCCCCOC(=O)C(=C)C	254.225	C16H30O2		0
Homopolymer	Polymethacrylates	Poly(2-ethoxyethylmethacrylate)	PHEMA	Poly(2-ethoxyethylmethacrylate)	C{-}C{n+}(C)(C(=O)OCCOCC)	C{-}C{+}(C)(C(=O)OCCOCC)	158.094	C8H14O3	CCOCCOC(=O)C(=C)C	158.094	C8H14O3		0
Homopolymer	Polymethacrylates	Poly(ethylmethacrylate)	PEMA	Poly(ethylmethacrylate)	C{-}C{n+}(C)(C(=O)OCC)	C{-}C{+}(C)(C(=O)OCC)	114.068	C6H10O2	CCOC(=O)C(=C)C	114.068	C6H10O2		0
Homopolymer	Polymethacrylates	Poly(hexylmethacrylate)	PHMA	Poly(hexylmethacrylate)	C{-}C{n+}(C)(C(=O)OCCCCCC)	C{-}C{+}(C)(C(=O)OCCCCCC)	170.131	C10H18O2	CCCCCCOC(=O)C(=C)C	170.131	C10H18O2		0
Homopolymer	Polymethacrylates	Poly(2-hydroxyethylmethacrylate)	PHEMA	Poly(2-hydroxyethylmethacrylate)	C{-}C{n+}(C)(C(=O)OCCO)	C{-}C{+}(C)(C(=O)OCCO)	160.11	C8H16O3	CC(=C)C(=O)OCCO	160.11	C8H16O3		0
Homopolymer	Polymethacrylates		PIBMA	Poly(isobutylmethacrylate)	C{-}C{n+}(C)(C(=O)OCC(C)C)	C{-}C{+}(C)(C(=O)OCC(C)C)	142.099	C8H14O2	CC(COC(=O)C(=C)C)C	142.099	C8H14O2		0
Homopolymer	Polymethacrylates	Poly(isopropylmethacrylate)	PIPMA	Poly(isopropylmethacrylate)	C{-}C{n+}(C)(C(=O)OC(C)C)	C{-}C{+}(C)(C(=O)OC(C)C)	128.084	C7H12O2	CC(OC(=O)C(=C)C)C	128.084	C7H12O2		0
Homopolymer	Polymethacrylates	Poly(methylmethacrylate)	PMMA	Poly(methylmethacrylate)	C{-}C{n+}(C)(C(=O)OC)	C{-}C{+}(C)(C(=O)OC)	100.052	C5H8O2	COC(=O)C(=C)C	100.052	C5H8O2		0
Homopolymer	Polymethacrylates	Poly(octadecylmethacrylate)	PODMA	Poly(octadecylmethacrylate),Poly(stearylmethacrylate)	C{-}C{n+}(C)(C(=O)OCCCCCCCCCCCCCCCCCC)	C{-}C{+}(C)(C(=O)OCCCCCCCCCCCCCCCCCC)	338.318	C22H42O2	CCCCCCCCCCCCCCCCCCOC(=O)C(=C)C	338.318	C22H42O2		0
Homopolymer	Polymethacrylates	Poly(Octylmethacrylate)	POMA	Poly(octylmethacrylate)	C{-}C{n+}(C)(C(=O)OCCCCCCCC)	C{-}C{+}(C)(C(=O)OCCCCCCCC)	198.162	C12H22O2	CCCCCCCCOC(=O)C(=C)C	198.162	C12H22O2		0
Homopolymer	Polymethacrylates	Poly(phenylmethacrylate)	PPhMA	Poly(phenylmethacrylate)	C{-}C{n+}(C)(C(=O)OC1CCCCC1)	C{-}C{+}(C)(C(=O)OC1CCCCC1)	162.068	C10H10O2	CC(=C)C(=O)OC1CCCCC1	162.068	C10H10O2		0
Homopolymer	Polymethacrylates	Poly(propylmethacrylate)	PPMA	Poly(propylmethacrylate)	C{-}C{n+}(C)(C(=O)OCCC)	C{-}C{+}(C)(C(=O)OCCC)	128.084	C7H12O2	CCCOC(=O)C(=C)C	128.084	C7H12O2		0
Homopolymer	Polymethacrylates	Poly(2-chloroethylmethacrylate)	PMCMA	Poly(2-chloroethylmethacrylate)	C{-}C{n+}(C)(C(=O)OCCCl)	C{-}C{+}(C)(C(=O)OCCCl)	148.029	C6H9ClO2	CC(=C)C(=O)OCCCl	148.029	C6H9ClO2		0
Homopolymer	Polyolefins (Polyalkenes)	Poly(butylene)	PB	Poly(ethylethylene),Poly(butylene)	C{-}C{n+}(CC)	C{-}C{+}(CC)	56.0626	C4H8	CCC=C	56.0626	C4H8		0
Homopolymer	Polyolefins (Polyalkenes)	Poly(butylethylene)		Poly(butylethylene)	C{-}C{n+}(CCCC)	C{-}C{+}(CCCC)	84.0939	C6H12	CCCCC=C	84.0939	C6H12		0
Homopolymer	Polyolefins (Polyalkenes)	Poly(cyclohexylethylene)	PVCH	Poly(cyclohexylethylene),Poly(vinylcyclohexane)	C{-}C{n+}(C1CCCCC1)	C{-}C{+}(C1CCCCC1)	110.11	C8H14	C=CC1CCCCC1	110.11	C8H14		0
Homopolymer	Polyolefins (Polyalkenes)	Polyethylene	PE,HDPE,LDPE	Poly(ethylene)	C{-}C{n+}	C{-}C{+}	28.0313	C2H4	C=C	28.0313	C2H4		0
Homopolymer	Polyolefins (Polyalkenes)	Poly(isobutene)	PIB	Poly(isobutene),Poly(isobutylene),Butylrubber	C{-}C{n+}(C)(C)	C{-}C{+}(C)(C)	56.0626	C4H8	CC(=C)C	56.0626	C4H8		0
Homopolymer	Polyolefins (Polyalkenes)	Poly(isobutylethylene)	PMP,TPX(MitsuiChemicals)	Poly(isobutylethylene)	C{-}(CC(C)C)C{n+}	C{-}(CC(C)C)C{+}	84.0939	C6H12	C=CCC(C)C	84.0939	C6H12		0
Homopolymer	Polyolefins (Polyalkenes)	Poly(propylene)	PP	Poly(propylene),Poly(1-methylethylene)	C{-}C{n+}(C)	C{-}C{+}(C)	42.047	CH2CHCH3	CC=C	42.047	CH2CHCH3		0
Homopolymer	Polyolefins (Polyalkenes)	Poly(1-pentene)		Poly(propylethylene)	C{-}C{n+}(CCC)	C{-}C{+}(CCC)	70.0783	C5H10	CCCC=C	70.0783	C5H10		0
Homopolymer	Polyolefins (Polyalkenes)	Poly(tert-butylethylene)	Pt-BE	Poly(tert-butylethylene)	C{-}C{n+}(C(C)(C)C)	C{-}C{+}(C(C)(C)C)	84.0939	C6H12	C=CC(C)(C)C	84.0939	C6H12		0
Homopolymer	Polyphenylenes and Other Conductive Polymers	Poly(p-phenylene)	PPP	Poly(p-phenylene)	C1{-}CC{n+}(CCC1)	C1{-}CC{+}(CCC1)	76.0313	C6H4	BrC1CCC(CC1)Br	233.868	C6H4Br2		0
Homopolymer	Polyphenylethers (Polyphenyleneoxide)	Poly(2,6-dimethyl-p-phenyleneoxide)	PPO,PPE	Poly(2,6-dimethyl-p-phenyleneoxide),Poly(2,6-dimethylphenol),Noryl®(blendwithpolystyrene)	O{-}C1C(C)CC{n+}(CC1(C))	O{-}C1C(C)CC{+}(CC1(C))	122.073	C8H10O	OC1C(C)CCCC1(C)	122.073	C8H10O		0
Homopolymer	Polyphenylethers (Polyphenyleneoxide)	Poly(2,6-diphenyl-p-phenyleneoxide)	SRU	Poly(2,6-diphenyl-p-phenyleneoxide),Poly(2,6-diphenylphenol)	O{-}C1C(C2CCCCC2)CC(n+}(CC1(C3CCCCC3))	O{-}C1C(C2CCCCC2)CC(+}(CC1(C3CCCCC3))	246.104	C18H14O	OC1C(CCCC1C1CCCCC1)C1CCCCC1	246.104	C18H14O		0
Alternating copolymer	Polyphenylthioethers(Armoatic Polythiols)	Poly(1,4-phenylenesulfide)	PPS	Poly(1,4-phenylenesulfide),Ryton®,Fortron®,Tedur®,Supec®	S{-}C1CCC{-}(CC1)	S{-}C1CCC{-}(CC1)	110.019	C6H6S	ClC1CCC(CC1)Cl.[Na]S[Na]	110.019	C6H6S		0
Homopolymer	Polystyrenes(GPPS, HIPS, EPS, SBR, SBS, ABS)	Polystyrene	PS	Polystyrene,Polyethenylbenzene,Lustrex®,Styron®,Vestyron®,Styrofoam®,Fome-Cor®,Luran®	C{-}C{n+}(C1CCCCC1)	C{-}C{+}(C1CCCCC1)	104.063	C8H8	C=CC1CCCCC1	104.063	C8H8		0
Homopolymer	Polystyrenes(GPPS, HIPS, EPS, SBR, SBS, ABS)	Poly(2-methoxystyrene)	PMOS	Poly(2-methoxystyrene)	C{-}C{n+}(C1C(OC)CCCC1)	C{-}C{+}(C1C(OC)CCCC1)	134.073	C9H10O	C=CC1CCCCC1OC	134.073	C9H10O		0
Homopolymer	Polystyrenes(GPPS, HIPS, EPS, SBR, SBS, ABS)	Poly(α-methylstyrene)	PAMS,PαMS	Poly(α-methylstyrene)	C{-}C{n+}(C)(C1CCCCC1)	C{-}C{+}(C)(C1CCCCC1)	118.078	C9H10	CC(=C)C1CCCCC1	118.078	C9H10		0
Homopolymer	Polystyrenes(GPPS, HIPS, EPS, SBR, SBS, ABS)	Poly(2-methylstyrene)	PMS	Poly(2-methylstyrene)	C{-}C{n+}(C1C(C)CCCC1)	C{-}C{+}(C1C(C)CCCC1)	118.078	C9H10	C=CC1CCCCC1C	118.078	C9H10		0
Homopolymer	Polystyrenes(GPPS, HIPS, EPS, SBR, SBS, ABS)	Poly(3-methylstyrene)	P3MS	Poly(3-methylstyrene)	C{-}C{n+}(C1CC(C)CCC1)	C{-}C{+}(C1CC(C)CCC1)	118.078	C9H10	C=CC1CCCC(C1)C	118.078	C9H10		0
Homopolymer	Polystyrenes(GPPS, HIPS, EPS, SBR, SBS, ABS)	Poly(4-methylstyrene)	PMS,PpMS,PPMS	Poly(4-methylstyrene)	C{-}C{n+}(C1CCC(C)CC1)	C{-}C{+}(C1CCC(C)CC1)	118.078	C9H10	C=CC1CCC(CC1)C	118.078	C9H10		0
Homopolymer	Polystyrenes(GPPS, HIPS, EPS, SBR, SBS, ABS)	Poly(4-tert-butylstyrene)	PtBS	Poly(4-tert-butylstyrene)	C{-}C{n+}(C1CCC(CC1)C(C)(C)C)	C{-}C{+}(C1CCC(CC1)C(C)(C)C)	160.125	C12H16	C=CC1CCC(CC1)C(C)(C)C	160.125	C12H16		0
Alternating copolymer	Polysulfides and Polythioethers(Polymercaptans,Polythiols)	Poly(ethylenesulfide)	TR	Poly(ethylenesulfide),Poly(thioethylene),Thiokolrubber,Thiokol®	S{-}CC{n+}	S{-}CC{+}	60.0034	C2H4S	ClCCCl.[Na]S[Na]	62.019	C2H6S		0
Alternating copolymer	Polysulfides and Polythioethers(Polymercaptans,Polythiols)	Poly(propylenesulfide)	PPS	Poly(propylenesulfide),Poly(2-methylthiirane)	S{-}CC{n+}(C)	S{-}CC{+}(C)	74.019	C3H6S	ClCC(C)Cl.[Na]S[Na]	76.0347	C3H8S		0
Alternating copolymer	Polysulfides and Polythioethers(Polymercaptans,Polythiols)	Poly(1,4-phenylenesulfide)		Poly(1,4-phenylenesulfide),Ryton®,Fortron®,Tedur®,Supec®	S{-}C1CCC{-}(CC1)	S{-}C1CCC{-}(CC1)	108.003	C6H4S	ClC1CCC(CC1)Cl.[Na]S[Na]	110.019	C6H6S		0
Alternating copolymer	Polyurethanes	Hexamethylenediisocyanate/Diethyleneglycol	PEG100-HMDI	Poly[(diethyleneglycol)-alt-(1,6-hexamethylenediisocyanate)],Hexamethylenediisocyanate/Diethyleneglycol	O{-}CCOCCOC(=O)NCCCCCCNC{n+}(=O)	O{-}CCOCCOC(=O)NCCCCCCNC{+}(=O)	274.153	C12H22N2O5	OCCOCCO.O=C=NCCCCCCN=C=O	274.153	C12H22N2O5		0
Alternating copolymer	Polyurethanes	Butanediol-alt-DiphenylmethaneDiisocyanate	MDI-BD	Poly[(1,4-butanediol)-alt-(4,4'-diphenylmethanediisocyanate)],Poly{(butane-1,4-diol)-alt-[bis(4-isocyanatophenyl)methane]}	O{-}CCCCOC(=O)NC1CCC(CC1)CC1CCC(CC1)NC{n+}(=O)	O{-}CCCCOC(=O)NC1CCC(CC1)CC1CCC(CC1)NC{+}(=O)	340.142	C19H20N2O4	OCCCCO.O=C=NC1CCC(CC1)CC1CCC(CC1)N=C=O	340.142	C19H20N2O4		0
Alternating copolymer	Polyurethanes	Ethyleneglycol/Diphenylmethanediisocyanate	EG-MDI	Poly{(ethyleneglycol)-alt-[bis(4-isocyanatophenyl)methane]},Ethyleneglycol/Diphenylmethanediisocyanate	O{-}CCOC(=O)NC1CCC(CC1)CC1CCC(CC1)NC{n+}(=O)	O{-}CCOC(=O)NC1CCC(CC1)CC1CCC(CC1)NC{+}(=O)	312.111	C17H16N2O4	OCCO.O=C=NC1CCC(CC1)CC1CCC(CC1)N=C=O	312.111	C17H16N2O4		0
Alternating copolymer	Polyurethanes	Poly[(tetrahydrofuran1000)-alt-(4,4'-diphenylmethanediisocyanate)]	PTMG1000-MDI	Poly[(tetramethyleneetherglycol1000)-alt-(4,4'-diphenylmethanediisocyanate)],Poly[(Poly(tetrahydrofuran1000)-alt-(4,4'-diphenylmethanediisocyanate)]	O{-}(CCCCO)<sub>13</sub>CCCCO(=O)NC1CCC(CC1)CC1CCC(CC1)NC{n+}(=O)	O{-}(CCCCO)<sub>13</sub>CCCCO(=O)NC1CCC(CC1)CC1CCC(CC1)NC{+}(=O)	312.111	C17H16N2O4	(OCCCC)<sub>14</sub>O.O=C=NC1CCC(CC1)CC1CCC(CC1)N=C=O	312.111	C17H16N2O4		0
Homopolymer	Polyvinyl Esters (Vinyl Ester Polymers) & Poly(vinyl alcohol)	Poly(vinylacetate)	PVAc,PVA	Poly(vinylacetate),Mowilith®	C{-}C{n+}(OC(=O)C)	C{-}C{+}(OC(=O)C)	86.0368	C4H6O2	CC(=O)OC=C	86.0368	C4H6O2		0
Homopolymer	Polyvinyl Esters (Vinyl Ester Polymers) & Poly(vinyl alcohol)	Poly(vinylalcohol)	PVOH,PVA	Poly(vinylalcohol),Elvanol®,Mowiol®,Poval®,Gohsenol®	C{-}(O)C{n+}	C{-}(O)C{+}	44.0262	C2H4O	C{-}(OC(=O)C)C{+}	44.0262	C2H4O		0
Homopolymer	Polyvinyl Esters (Vinyl Ester Polymers) & Poly(vinyl alcohol)	Poly(vinylbenzoate)	PVBZ	Poly(vinylbenzoate)	C{-}C{n+}(OC(=O)C1CCCCC1)	C{-}C{+}(OC(=O)C1CCCCC1)	148.052	C9H8O2	C=COC(=O)C1CCCCC1	148.052	C9H8O2		0
Alternating copolymer	Polyvinyl Esters (Vinyl Ester Polymers) & Poly(vinyl alcohol)	Poly(vinylbutyral)	PVB	Poly(vinylbutyral),Winlite®,Saflex®,Butacite®	C1{-}CC(OC(CCC)O1)C{n+}	C1{-}CC(OC(CCC)O1)C{+}	116.084	C6H12O2	C{-}C(O){+}.O=CCCC	116.084	C6H12O2		0
Homopolymer	Polyvinyl Esters (Vinyl Ester Polymers) & Poly(vinyl alcohol)	Poly(vinylbutyrate)	PVB	Poly(vinylbutyrate),Poly(n-butyricacidvinylester)	C{-}C{n+}(OC(=O)CCC)	C{-}C{+}(OC(=O)CCC)	114.068	C6H10O2	CCCC(=O)OC=C	114.068	C6H10O2		0
Alternating copolymer	Polyvinyl Esters (Vinyl Ester Polymers) & Poly(vinyl alcohol)	Poly(vinylformal)	PVF	Poly(vinylformal),Vinylec®,Formvar®	C1{-}CC(OCO1)C{n+}	C1{-}CC(OCO1)C{+}	74.0368	C3H6O2	C{-}C(O){+}.O=C	74.0368	C3H6O2		0
Homopolymer	Polyvinyl Esters (Vinyl Ester Polymers) & Poly(vinyl alcohol)	Poly(vinylformate)	PVF	Poly(vinylformate)	C{-}C{n+}OC=O	C{-}C{+}OC=O	72.0211	C3H4O2	C=COC=O	72.0211	C3H4O2		0
Homopolymer	Polyvinyl Esters (Vinyl Ester Polymers) & Poly(vinyl alcohol)	Poly(vinylstearate)	PVS	Poly(vinylsterate),Poly(octadecanoicacidethenylester)	C{-}C{n+}(OC(=O)CCCCCCCCCCCCCCCCC)	C{-}C{+}(OC(=O)CCCCCCCCCCCCCCCCC)	310.287	C20H38O2	CCCCCCCCCCCCCCCCCC(=O)OC=C	310.287	C20H38O2		0
Homopolymer	Polyvinyl ethers (PVE)	Poly(butylvinylether)	PVBE	Poly(butylvinylether),Poly(vinylbutylether)	C{-}C{n+}(OCCCC)	C{-}C{+}(OCCCC)	100.089	C6H12O	CCCCOC=C	100.089	C6H12O		0
Homopolymer	Polyvinyl ethers (PVE)	Poly(ethylvinylether)	PVE	Poly(ethylvinylether),Poly(vinylethylether),Lutonal®A25&amp;A50	C{-}C{n+}(OCC)	C{-}C{+}(OCC)	72.0575	C4H8O	CCOC=C	72.0575	C4H8O		0
Homopolymer	Polyvinyl ethers (PVE)	Poly(vinylisobutylether)	PVIBE	Poly(vinylisobutylether),Poly(isobutylvinylether)	C{-}C{n+}(OCC(C)C)	C{-}C{+}(OCC(C)C)	100.089	C6H12O	C=COCC(C)C	100.089	C6H12O		0
Homopolymer	Polyvinyl ethers (PVE)	Poly(isopropylvinylether)	PIPVE	Poly(isopropylvinylether),Poly(vinylisopropylether),Lutonal®I60	C{-}C{n+}(OC(C)C)	C{-}C{+}(OC(C)C)	86.0732	C5H10O	C=COC(C)C	86.0732	C5H10O		0
Homopolymer	Polyvinyl ethers (PVE)	Poly(methylvinylether)	PVME	Poly(methylvinylether),Gantrez®,Lutonal®M40	C{-}C{n+}(OC)	C{-}C{+}(OC)	169.973	C7H7Br	COC=C	169.973	C7H7Br		0
Homopolymer	Polyvinyl ethers (PVE)	Poly(octylvinylether)	POVE	Poly(octylvinylether),Poly(vinyloctylether)	C{-}C{n+}(OCCCCCCCC)	C{-}C{+}(OCCCCCCCC)	156.151	C10H20O	CCCCCCCCOC=C	156.151	C10H20O		0
Homopolymer	Polyvinyl ethers (PVE)	Poly(propylvinylether)	PPVE	Poly(propylvinylether),Poly(vinylpropylether)	C{-}C{n+}(OCCC)	C{-}C{+}(OCCC)	86.0732	C5H10O	CCCOC=C	86.0732	C5H10O		0
Alternating copolymer	Polyurethanes	Thermoplastic polyurethane	TPU	Thermoplastic Polyurethane	O=C{+}NC1=CC=C(CC2=CC=C(NC(OCCCCO{n-})=O)C=C2)C=C1	O=C{+}NC1=CC=C(CC2=CC=C(NC(OCCCCO{-})=O)C=C2)C=C1	340.142	C19H20N2O4	C1=CC(=CC=C1CC2=CC=C(C=C2)N=C=O)N=C=O.C(CCO)CO	340.142	C19H20N2O4		0
Alternating copolymer	Polystyrenes(GPPS, HIPS, EPS, SBR, SBS, ABS)	Acrylonitrile butadiene styrene	ABS	Elastomer Acrylonitrile-Butadiene-Styrene copolymer	C{-}C(C#N)CC/C=C/CCC{n+}C1=CC=CC=C1	C{-}C(C#N)CC/C=C/CCC{+}C1=CC=CC=C1	225.152	C16H19N	C=CC=C.C=CC#N.C=CC1=CC=CC=C1	225.152	C16H19N		0
Block polymer	Biodegradable Polyesters	Polybutylene adipate terephthalate,Polyterephthalic acid	PBAT.PBA	Polyterephthalic acid	O=C{-}CCCCC(OCCCC{m+}O)=O.O{-}CCOC(=O)CCCCCCCCC{n+}(=O)	O=C{-}CCCCC(OCCCC{+}O)=O	200.105	C10H16O4	OCCCCOC(CCCCC(O)=O)=O.O=CC1=CC=C(C(OCCCC[O])=O)C=C1	218.115	C10H18O5		0
Block polymer	Biodegradable Polyesters	Polybutylene adipate terephthalate,Polybutanediol adipate	PBAT.PBT	Polybutanediol adipate	O=C{-}CCCCC(OCCCC{m+}O)=O.O{-}CCOC(=O)CCCCCCCCC{n+}(=O)	O{-}CCOC(=O)CCCCCCCCC{+}(=O)	220.074	C12H12O4	OCCCCOC(CCCCC(O)=O)=O.O=CC1=CC=C(C(OCCCC[O])=O)C=C2	238.084	C12H14O5		0

## Sheet: S3- Additional monomer list
Polymer				Monomer
No	Source	Nos. in Table S4	ACRONYMS-NAME	Monomer mass	Fomula	Monomer
1	PlasticMAPs from ES&T	108	Other - Rubber, Other - Thermoplastic, PS, PVC	62.0175	BH3O3	62
2		154	ABS, Other - Rubber, Other - Thermoplastic	71.0371	C3H5NO	71
3		155	Other - Rubber, PVC	206.167	C14H22O	206.2
4		156	ABS, LDPE, Other - Thermoplastic, PA, PC, PUR, PVC	228.115	C15H16O2	228.1
5		157	ABS, Other - Thermoplastic, PA, PET	30.0106	CH2O	30
6		159	ABS, HDPE, LDPE, Other - Rubber, Other - Thermoplastic, PA, PC, PVC	94.0419	C6H6O	94
7		169	HDPE, LDPE, Other - Thermoplastic, PA, PP, PUR	198.116	C13H14N2	198.1
8		171	Other - Rubber, PC	150.104	C10H14O	150.1
9		174	PUR	250.074	C15H10N2O2	250.1
10		175	Other - Rubber, PUR	250.074	C15H10N2O2	250.1
11		177	PUR	174.043	C9H6N2O2	174
12		178	PUR	174.043	C9H6N2O2	174
13		180	ABS, Other - Thermoplastic, PVC	95.9534	C2H2Cl2	96
14		181	Other - Bioplastic, Other - Thermoplastic, PET	145.969	C6H4Cl2	146
15		182	ABS, Other - Rubber, Other - Thermoplastic, PA	53.0265	C3H3N	53
16		186	PET	222.089	C12H14O4	222.1
17		190	PUR	58.0419	C3H6O	58
18		191	LDPE, Other - Rubber, PET	297.096	C12H15N3O6	297.1
19		194	Other - Thermoplastic, PA	88.1	C4H12N2	88.1
20		195	ABS, HDPE, LDPE, Other - Thermoplastic, PVC	86.0368	C4H6O2	86
21		246	Other - Rubber	145.946	C3H5Cl3	145.9
22		251	Other - Rubber, PET, PP, PUR, PVC	220.183	C15H24O	220.2
23		252	PUR, PVC	396.288	C23H40O5	396.3
24		255	PUR, PVC	250.193	(C15H24O.CH2O)x	250.2
25		256	PUR, PVC	493.271	(C2H4O)nC15H24O4S.H3N	493.3
26		262	PUR, PVC	528.366	C29H52O8	528.4
27		277	Other - Rubber, PVC	206.167	C14H22O	206.2
28		281	Other - Rubber, PVC	206.167	C14H22O	206.2
29		283	Other - Rubber, PVC	536.255	Unspecified	536.3
30		291	Other - Thermoplastic	413.974	C8HF15O2	414
31		295	Other - Thermoplastic	431	C8HF15O2.H3N	431
32		398	PVC	462.298	C27H42O6	462.3
33		439	ABS, Other - Bioplastic, Other - Rubber, PET, PS, PVC	546.392	C33H54O6	546.4
34		456	ABS, HDPE, HIPS, LDPE, Other - Rubber, Other - Thermoplastic, PA, PC, PET, PP, PS, PUR, PVC	480.393	C28H52N2O4	480.4
35		460	HDPE, LDPE, Other - Bioplastic, Other - Rubber, Other - Thermoplastic, PET, PP, PVC	284.272	C18H36O2	284.3
36		461	HDPE, LDPE, Other - Thermoplastic, PA, PET, PP	60.0324	CH4N2O	60
37		473	Other - Thermoplastic, PVC	122.037	C7H6O2	122
38		488	HDPE, LDPE, Other - Rubber, PA	260.131	C18H16N2	260.1
39		504	Other - Rubber, PET, PVC	148.016	C8H4O3	148
40		526	ABS, HDPE, LDPE, Other - Rubber, Other - Thermoplastic, PA, PC, PET, PP, PS, PUR, PVC	508.424	C30H56N2O4	508.4
41		529	HDPE, LDPE, Other - Rubber, Other - Thermoplastic, PET, PP, PUR	694.308	C17H29O4P.1/2Ca	694.3
42		531	Other - Rubber, Other - Thermoplastic, PA, PET	166.027	C8H6O4	166
43		537	PA	108.058	C7H8O	108.1
44		556	Other - Rubber, PUR	198.089	C10H14O4	198.1
45		561	LDPE, PA, PET, PVC	130.136	C8H18O	130.1
46		575	PVC	97.969	C2H4Cl2	98
47		577	Other - Rubber, PET, PUR	62.0368	C2H6O2	62
48		581	PET	98.0004	C4H2O3	98
49		585	Other - Rubber	110.037	C6H6O2	110
50		588	HDPE, LDPE, Other - Thermoplastic, PA, PET, PP, PUR	126.065	C3H6N6	126.1
51		593	PUR, PVC	72.0575	C4H8O	72.1
52		603	Other - Thermoplastic	90.0317	C3H6O3	90
53		608	HDPE, LDPE, Other - Thermoplastic, PA, PET, PP	106.063	C4H10O3	106.1
54		612	LDPE	130.136	C8H18O	130.1
55		622	Other - Rubber, PA, PET	282.256	C18H34O2	282.3
56		623	Other - Rubber, PA, PET	216.042	C12H8O4	216
57		625	PET, PUR	367.814	C9H2Cl6O3	367.8
58		626	LDPE, Other - Bioplastic, Other - Rubber, Other - Thermoplastic, PET, PVC	136.074	C5H12O4	136.1
59		630	Other - Thermoplastic	226.121	C12H18O4	226.1
60		641	Other - Rubber, Other - Thermoplastic, PET	194.058	C10H10O4	194.1
61		654	PA, PET, PUR	146.058	C6H10O4	146.1
62		661	PA, PET, PUR	104.084	C5H12O2	104.1
63		680	Other - Rubber, PET, PUR, PVC	246.089	C14H14O4	246.1
64		716	Other - Thermoplastic, PVC	340.261	C20H36O4	340.3
65		721	Other - Thermoplastic	254.225	C16H30O2	254.2
66		746	PET	188.047	C11H8O3	188
67		764	Other - Thermoplastic, PET	362.272	C25H34N2	362.3
68		786	PUR	348.086	C18H12N4O4	348.1
69		797	PC	306.126	C20H18O3	306.1
70		807	PET	144.115	C8H16O2	144.1
71		818	Other - Thermoplastic	338.173	C18H26O6	338.2
72		829	PVC	242.261	C16H34O	242.3
73		862	Other - Bioplastic	90.0317	C3H6O3	90
74		893	PUR, PVC	92.0473	C3H8O3	92
75		896	HDPE, LDPE, Other - Rubber, PET, PP, PVC	256.24	C16H32O2	256.2
76		900	HDPE, LDPE, PET, PP, PS, PUR	76.0524	C3H8O2	76.1
77		916	ABS, EPS, HDPE, LDPE, Other - Thermoplastic, PET, PS	194.094	C11H14O3	194.1
78		940	HDPE, LDPE, Other - Bioplastic, Other - Rubber, Other - Thermoplastic, PA, PP, PVC	60.0211	C2H4O2	60
79		941	Other - Thermoplastic, PET	74.0368	C3H6O2	74
80		964	ABS, HDPE, LDPE, PA, PET, PP	32.0262	CH4O	32
81		965	HDPE, LDPE, PP	60.0575	C3H8O	60.1
82		977	HDPE, LDPE, Other - Rubber, PP	474.407	C31H54O3	474.4
83		1039	HDPE, LDPE	74.0732	C4H10O	74.1
84		1055	ABS, Other - Thermoplastic, PVC	61.9923	C2H3Cl	62
85		1092	EPS, Other - Thermoplastic	192.027	C6H8O7	192
86		1094	PVC	134.094	C6H14O3	134.1
87		1107	ABS, HDPE, LDPE, Other - Thermoplastic, PA, PET	72.0211	C3H4O2	72
88		1123	ABS, Other - Thermoplastic, PET, PVC	100.052	C5H8O2	100.1
89		1137	Other - Thermoplastic	130.063	C6H10O3	130.1
90		1148	Other - Thermoplastic, PET	170.073	C12H10O	170.1
91		1160	ABS, HDPE, LDPE, Other - Thermoplastic	86.0368	C4H6O2	86
92		1163	Other - Thermoplastic	198.089	C10H14O4	198.1
93		1169	PET	138.032	C7H6O3	138
94		1188	Other - Rubber	249.111	C12H15N3O3	249.1
95		1193	PUR	200.095	C12H12N2O	200.1
96		1208	PC	214.063	C13H10O3	214.1
97		1223	ABS, Other - Thermoplastic	184.146	C11H20O2	184.1
98		1228	PET	151.063	C8H9NO2	151.1
99		1246	Other - Thermoplastic	100.052	C5H8O2	100.1
100		1249	HDPE, LDPE, PA, PP	113.084	C6H11NO	113.1
101		1268	PA	108.069	C6H8N2	108.1
102		1271	Other - Thermoplastic	128.084	C7H12O2	128.1
103		1288	HDPE, LDPE, PP, PVC	90.0681	C4H10O2	90.1
104		1295	PET	172.074	C8H12O4	172.1
105		1302	PA	108.058	C7H8O	108.1
106		1303	Other - Rubber, PA, PUR	108.069	C6H8N2	108.1
107		1315	Other - Thermoplastic	286.142	C14H22O6	286.1
108		1329	PA, PET, PUR	118.027	C4H6O4	118
109		1338	Other - Thermoplastic, PET, PUR	90.0681	C4H10O2	90.1
110		1342	PA	132.042	C5H8O4	132
111		1354	PVC	178.03	C6H10O4S	178
112		1355	PA, PET	202.121	C10H18O4	202.1
113		1386	LDPE	158.167	C10H22O	158.2
114		1409	PP, PUR	385.824	C9H4Cl6O4	385.8
115		1424	Other - Thermoplastic	165.985	C3F6O	166
116		1455	PA, PET	166.027	C8H6O4	166
117		1474	Other - Thermoplastic, PET	110.037	C6H6O2	110
118		1477	HDPE, LDPE, PA, PET	72.0575	C4H8O	72.1
119		1482	HDPE, LDPE, PA, PET, PP	188.105	C9H16O4	188.1
120		1485	PA	116.131	C6H16N2	116.1
121		1501	PVC	254.137	C10H22O7	254.1
122		1504	Other - Thermoplastic	67.0422	C4H5N	67
123		1505	Other - Rubber	88.008	C4H5Cl	88
124		1542	Other - Thermoplastic	77.9516	Na2S	78
125		1620	ABS, Other - Thermoplastic, PA, PET	100.052	C5H8O2	100.1
126		1625	ABS, Other - Thermoplastic	128.084	C7H12O2	128.1
127		1626	PET	61.0528	C2H7NO	61.1
128		1638	HDPE, LDPE, Other - Rubber, PP	200.178	C12H24O2	200.2
129		1649	PET	194.058	C10H10O4	194.1
130		1660	PA	136.1	C8H12N2	136.1
131		1666	Other - Thermoplastic	124.052	C7H8O2	124.1
132		1674	ABS, Other - Thermoplastic	207.057	C7H13NO4S	207.1
133		1697	Other - Thermoplastic	158.001	C4H8O3S.Na	158
134		1719	Other - Thermoplastic	265.979	C5F10O	266
135		1731	EPS, HDPE, HIPS, LDPE, Other - Rubber, Other - Thermoplastic, PP, PS	138.141	C10H18	138.1
136		1733	Other - Thermoplastic	128.084	C7H12O2	128.1
137		1735	HDPE, LDPE, PC, PP	340.167	C21H24O4	340.2
138		1754	PA	210.21	C13H26N2	210.2
139		1829	Other - Thermoplastic	240.209	C15H28O2	240.2
140		1871	PA	201.173	C11H23NO2	201.2
141		1945	HDPE, LDPE, Other - Rubber, Other - Thermoplastic, PET, PP	248.108	C10H20O5Si	248.1
142		2051	HDPE, LDPE, PP	148.056	C5H12O3Si	148.1
143		2055	Other - Thermoplastic	518.017	C13H7F17O2	518
144		2073	Other - Thermoplastic	157.11	C8H15NO2	157.1
145		2137	PUR	210.043	C12H6N2O2	210
146		2163	Other - Thermoplastic	218.054	C13H8F2O	218.1
147		2223	PET	295.997	C10H10O7S.Na	296
148		2235	PUR	222.137	C12H18N2O2	222.1
149		2278	PUR, PVC	182.079	C6H14O6	182.1
150		2279	PET, PUR	114.068	C6H10O2	114.1
151		2282	PET	76.0524	C3H8O2	76.1
152		2295	Other - Rubber, PUR	262.168	C15H22N2O2	262.2
153		2320	Other - Thermoplastic	136.089	C9H12O	136.1
154		2323	PET	210.016	C9H6O6	210
155		2351	HDPE, LDPE, PP	228.209	C14H28O2	228.2
156		2366	PP	128.045	C7H6O2.Li	128
157		2399	Other - Thermoplastic	122.073	C8H10O	122.1
158		2412	Other - Thermoplastic	142.099	C8H14O2	142.1
159		2494	PA, PET, PUR	118.099	C6H14O2	118.1
160		2574	HDPE, LDPE	146.058	C6H10O4	146.1
161		2784	PA	238.241	C15H30N2	238.2
162		2837	PET	134.022	C4H6O5	134
163		2841	PA, PET	230.152	C12H22O4	230.2
164		2870	HDPE, LDPE, PP	60.0575	C3H8O	60.1
165		2932	HDPE, LDPE, Other - Rubber, Other - Thermoplastic, PET, PP	44.0262	C2H4O	44
166		2933	Other - Thermoplastic, PA, PUR	44.0262	C2H4O	44
167		2935	Other - Thermoplastic	64.0125	C2H2F2	64
168		2936	PA, PC	97.9326	CCl2O	97.9
169		2978	PA	97.9769	H3O4P	98
170		3016	HDPE, LDPE, PP	190.103	C8H18O3Si	190.1
171		3030	HDPE, LDPE, Other - Thermoplastic, PP	74.0368	C3H6O2	74
172		3032	PET	76.016	C2H4O3	76
173		3036	Other - Thermoplastic	115.964	C2ClF3	116
174		3037	Other - Thermoplastic	85.0528	C4H7NO	85.1
175		3038	Other - Thermoplastic	86.0368	C4H6O2	86
176		3043	PET	152.084	C9H12O2	152.1
177		3088	ABS	116.047	C5H8O3	116
178		3091	Other - Rubber, PA, PUR	168.09	C8H12N2O2	168.1
179		3098	PET	244.074	C14H12O4	244.1
180		3107	PET	152.047	C8H8O3	152
181		3138	HDPE, LDPE	140.157	C10H20	140.2
182		3139	Other - Thermoplastic, PA, PET	111.068	C6H9NO	111.1
183		3254	PUR	264.09	C16H12N2O2	264.1
184		3269	HDPE, LDPE, PET	186.068	C12H10O2	186.1
185		3278	Other - Thermoplastic, PA, PET	101.048	C4H7NO2	101
186		3279	Other - Thermoplastic	114.068	C6H10O2	114.1
187		3282	PET	136.052	C8H8O2	136.1
188		3296	PA	197.178	C12H23NO	197.2
189		3315	Other - Thermoplastic	88.016	C3H4O3	88
190		3320	Other - Thermoplastic	114.068	C6H10O2	114.1
191		3322	Other - Thermoplastic	130.027	C5H6O4	130
192		3325	Other - Thermoplastic	142.099	C8H14O2	142.1
193		3326	Other - Thermoplastic	142.099	C8H14O2	142.1
194		3341	Other - Rubber	127.136	C8H17N	127.1
195		3406	HDPE, LDPE, Other - Rubber, Other - Thermoplastic, PP	144.115	C8H16O2	144.1
196		3408	Other - Rubber, Other - Thermoplastic	172.146	C10H20O2	172.1
197		3418	HDPE, LDPE, PET	58.0419	C3H6O	58
198		3427	Other - Thermoplastic, PVC	105.942	C2H3Br	105.9
199		3433	Other - Thermoplastic, PP	102.032	C4H6O3	102
200		3434	HDPE, LDPE, Other - Thermoplastic, PP	88.0524	C4H8O2	88.1
201		3502	Other - Thermoplastic	154.074	C7H10N2O2	154.1
202		3650	Other - Thermoplastic, PUR	302.225	C20H30O2	302.2
203		3658	PVC	166.027	C8H6O4	166
204		3747	PET	144.115	C8H16O2	144.1
205		3759	Other - Thermoplastic	338.318	C22H42O2	338.3
206		3773	Other - Bioplastic, PUR	342.116	C12H22O11	342.1
207		3796	Other - Thermoplastic	330.168	C16H26O7	330.2
208		3856	Other - Thermoplastic	246.104	C18H14O	246.1
209		3898	Other - Thermoplastic	148.089	C10H12O	148.1
210		3905	Other - Thermoplastic	136.089	C9H12O	136.1
211		4009	PET	254.079	C12H14O6	254.1
212		4102	Other - Thermoplastic	512.241	C29H36O8	512.2
213		7390	Other - Rubber, PA, PET	212.131	C14H16N2	212.1

## Sheet: S4 - Monomers of concern
Substances potentially used as plastic monomers																					Hazard Classification																		Literature review		Regulation
																																									Overview		International Conventions
Identifiers										Use						Tonnage					Hazard Properties														Ranking								Montreal Protocol
Substance id used within the PlasticMAP database	Chemical Abstract Service (CAS) Registry Number - retrieved from SciFinder	Substance Name as registered at the Chemical Abstract Service (CAS) - retrieved from SciFinder	IUPAC International Chemical Identifier as InChIKey (Structural identifier) - retrieved from SciFinder and USEPA CompTox	IUPAC International Chemical Identifier as InChI string (Structural identifier) - retrieved from SciFinder and USEPA CompTox	Simplified molecular-input line-entry system (structural identifier) - retrieved from SciFinder and USEPA CompTox	Chemical formula that shows the number and kinds of atoms in a molecule. -retrieved from SciFinder	Monoisotopic mass (i.e. from accurate masses of the most abundant natural isotopes) in g/mol retrieved from SciFinder	Alternate Chemical Abstract Service (CAS) Registry Numbers, i.e. numbers used in parallel to the active one - retrieved from SciFinder	Deleted Chemical Abstract Service (CAS) Registry Numbers, i.e. numbers that were replaced by the active one - retrieved from SciFinder	Functions that this substance might fulfill. Different functions are comma-seperated.	Polymers that this substance might be compatible with. Different polymers are comma-seperated.	Industrial sectors in which plastics including this substance might be used. Different industrial sectors are comma-seperated.	This substance is used in industrial sectors for which food-contact is relevant. (0 = False, 1 = True)	Number of considered regions in which this substance is registered. Reaching from no registrations (= 0) to registration in all considered regions (= 18).	Regions in which this substance is registered. Different regions are comma-seperated.	Minimal Tonnage in the EU according to tonnage band in metric tons per year (t/yr). - retrieved from the ECHA registered tonnage (id = 187 on Sheet S2)	Total tonnage in the Nordic countries in metric tons per year (t/yr). - retrieved from the SPIN database (id = 329 on Sheet S2)	Total tonnage in the USA in metric tons per year (t/yr). - retrieved from the US CDR database (id = 201 on Sheet S2)	Minimal tonnage for substances part of the OECD high production volume chemicals list in metric tons per year (t/yr). Substances are only listed if their tonnage exceeds 1'000 t/yr - retrieved from OECD high production volume chemicals list (id = 158 on Sheet S2)	Total tonnage in all considered regions in metric tons per year (t/yr). US and EU tonnages were combined (SPIN tonnages were used when EU was not available). OECD tonnages are used if no other tonnages were available.	Persistent, bioaccumulative and toxic substance. (blank = missing hazard data, 0 = not fulfilled, 0.5 = under investigation, 1= fulfilled)	Very Persistent and very bioaccumulative substance. (blank = missing hazard data, 0 = not fulfilled, 0.5 = under investigation, 1= fulfilled)	Very Persistent substance. Degradation half-life is larger than 60 days (marine or fresh water), 180 days (marine sediment, fresh water sediment or soil). (blank = missing hazard data, 0 = not fulfilled, 0.5 = under investigation, 1= fulfilled)	Persistent substance. Degradation half-life is larger than 60 days (marine water), 40 days (fresh water), 180 days (marine sediment) or 120 days (fresh water sediment or soil). (blank = missing hazard data, 0 = not fulfilled, 0.5 = under investigation, 1= fulfilled)	Bioaccumulative substance. Bioconcentration factor (BCF) in aquatic species is larger than 2'000. (blank = missing hazard data, 0 = not fulfilled, 0.5 = under investigation, 1= fulfilled)	Very bioaccumulative substance. Bioconcentration factor (BCF) in aquatic species is larger than 5000. (blank = missing hazard data, 0 = not fulfilled, 0.5 = under investigation, 1= fulfilled)	Carcinogen, mutagen or reproductive toxicant. (blank = missing hazard data, 0 = not fulfilled, 0.5 = Category 2, 1= Category 1)	Carcinogen. Substance that promotes the formation of cancer. (blank = missing hazard data, 0 = not fulfilled, 0.5 = Category 2 / H351, 1= Category 1 / H350)	Mutagen. Substance that can permanenty change genetic material and increased the frequency of mutations. (blank = missing hazard data, 0 = not fulfilled, 0.5 = Category 2 / H341, 1= Category 1 / H340)	Reproductive toxicant. Substance which interferes with normal reprocuction, e.g. by adversely impacting sexual function or fertility or by causeing developmental toxicity in the offspring. (blank = missing hazard data, 0 = not fulfilled, 0.5 = Category 2 / H361, 1= Category 1 / H360 / H362)	Specific target organ toxicity comprises all significant health effects, not otherwise specifically included in the GHS, that can impair function in the target organ. (blank = missing hazard data, 0 = not fulfilled, 0.5 = Category 2 / H373, 1= Category 1 / H372)	Chronic aquatic toxicity. Substance that cause adverse effects to aquatic organisms during exposures that are long in relation to the lifecycle of the organism. (blank = missing hazard data, 0 = not fulfilled, 0.5 = Category 2 or 3 / H401 / H402, 1= Category 1 / H400)	Respiratory sensitization. Substance that induces hypersensitivity of the airways following inhalation of the substance. (blank = missing hazard data, 0 = not fulfilled, 1= Category 1 / H334)	Endocrine disrupting chemical. Chemicals that may interfere with the hormonal system. (blank = missing hazard data, 0 = not fulfilled, 0.5 = under investigation, 1= fulfilled)	Number of PBT criteria (persistence, bioaccumulatio and toxicity) fulfilled according to REACH Article 57, reach from 0 (no criteria fulfilled) to 3 (P,B and T criterion fulfilled)	Number of all considerd hazard criteria (P, B, AqTox, STOT_RE, C, M, R, EDC) fulfilled according to REACH Article 57, reaching from 0 (no criteria fulfilled) to 8 (all criteria fulfilled)	High production volume chemical. The substance's tonnage in the considered regions is above 1000 t/yr. (0 = False, 1 = True)	Level of concern. Metric defined in this study to preliminarily prioritize substances. (Unknown = Insufficient hazard data in the considerd hazard data sources. Low = Sufficient hazard data, but not fulfilling hazard criteria. Medium = Fulfilling hazard criteria. High = Fulfilling hazard criteria and high production volume chemical.)	The substance appears under a negative regulatory list (e.g. authorization requested for specific uses, ban in certain applications) (0 = False, 1 = True)	Negative regulatory list (e.g. authorization requested for specific uses, ban in certain applications) under which this substance is listed. Different regulations are comma-seperated.	The substance is listed under the Montreal Protocol of the United Nations (id=347 on Sheet S2) (0 = False, 1 = True)	The substance is listed under the US implementation of the Montreal Protocol, i.e. the Ozone Depleting Substances List under the Clean Air Act (id=345 on Sheet S2) (0 = False, 1 = True)	The substance is listed under the EU implementation of the Montreal Protocol, i.e. the EU Regulations on substances that deplete the ozone layer (id=346 on Sheet S2) (0 = False, 1 = True)	The substance is listed under the Stockholm Convention on Persistent Organic Pollutants of the United Nations (as provided by the Japanese Chemical Risk Information Platform, id = 316 on Sheet S2) (0 = False, 1 = True)	The substance is listed under the EU implementation of the Stockholm Convention, i.e. the EU Persistent Organic Pollutant regulation (id=319 on Sheet S2) (0 = False, 1 = True)
id	CASRN	Name	InChI_key	InChI_string	SMILES	Molecular_formula	Molecular_Mass_Isotope	Alternative_CASRN_SciFinder	Deleted_CASRN_SciFinder	Function	Polymer	Industrial_Sector	Industrial_Sector_Food_contact	Number Regions	Regions	EU	Nordic_Countries_SPIN	USA	OECD	Total	PBT	vPvB	perisistent_P	very_persistent_vP	bioaccumulative_B	very_bioaccumulative_vB	CMR	carcinogenic_C	mutagenic_M	reprotoxic_R	specific_target_organ_toxicity_repeated_exposure_STOT_RE	aquatic_toxicity_AqTox	respiratory_sensitization_RespSens	endocrine_disrupting_EDC	PBT_criteria_fulfilled	Hazard_Criteria_fulfilled	high_production_volume_chemical_HPV	level_of_concern	level_of_research	number_references_Scifinder	regulated	relevant_Regulations	Montreal	US_Ozone_Depleting_Substances	EU_Controlled_Substances_Montreal
1	'7440-38-2	Arsenic	RQNWIZPPADIBDY-UHFFFAOYSA-N	InChI=1S/As	[As]	As	74.9216		39277-51-5, 55624-62-9	Biocide, Colorant, Crosslinking Agent, Filler, Other Processing Aids	LDPE, Other - Bioplastic, PET, PUR, PVC	Agriculture, Automotive, Building & Construction, Electrical and Electronic Equipment, Household items, furniture and other, Hygiene and Medical items, Textiles, Toys	0	15	Canada, China, EU, Malaysia, Mexico, New Zealand, Nordic Countries, OECD, Philippines, South Korea, Taiwan, Thailand, Turkey, United States, Vietnam	1000	1000	1000	1000	2000		1					1	1	0.5	1	1	1	0		1	4.5	1	high	1	EU REACH Restriction, EU Toys directive, Korea REACH Authorisation		0	0	0	0
2	'7778-39-4	Arsenic acid (H3AsO4)	DJHGAFSJWGLOIV-UHFFFAOYSA-N	InChI=1S/AsH3O4/c2-1(3,4)5/h(H3,2,3,4,5)	O[As](O)(O)=O	As H3 O4	141.925		1327-52-2, 58076-82-7	Biocide, Colorant	LDPE, PET, PUR, PVC	Automotive, Building & Construction, Electrical and Electronic Equipment, Textiles	0	13	Canada, China, EU, Japan, Malaysia, Mexico, Nordic Countries, OECD, Philippines, South Korea, Taiwan, United States, Vietnam	1000	0	1000	1000	2000		1					1	1	0.5	0.5	1	1	0		1	4	1	high	1	Rotterdam Convention (EU PIC List), EU REACH Restriction, EU REACH Authorisation, EU REACH SVHC, EU Toys directive, Korea REACH Authorisation		0	0	0	0
4	'1303-28-2	Arsenic oxide (As2O5)	COHDHYZHOPQOFD-UHFFFAOYSA-N	InChI=1S/As2O5/c3-1(4)7-2(5)6	O=[As](=O)O[As](=O)=O	As . O	229.818		12355-85-0, 13843-65-7, 856565-65-6	Biocide, Colorant, Filler	LDPE, PET, PUR, PVC	Automotive, Building & Construction, Electrical and Electronic Equipment, Textiles	0	11	Canada, China, EU, Japan, Mexico, Nordic Countries, OECD, Philippines, South Korea, Taiwan, United States		1000		1000	1000		1					1	1	0.5	0.5	1	1	0		1	4	1	high	1	Rotterdam Convention (EU PIC List), EU REACH Restriction, EU REACH Authorisation, EU REACH SVHC, EU Toys directive, Korea REACH Restriction, Korea REACH Authorisation		0	0	0	0
5	'1327-53-3	Arsenic oxide (As2O3)	QTLQKAJBUDWPIB-UHFFFAOYSA-N	InChI=1S/2As.3O/q2*+3;3*-2	[O--].[O--].[O--].[As+3].[As+3]	As2 O3	197.828		28380-38-3, 856307-43-2	Biocide, Colorant, Other Processing Aids	LDPE, PET, PUR, PVC	Automotive, Building & Construction, Electrical and Electronic Equipment, Textiles	0	14	Canada, China, EU, Japan, Malaysia, Mexico, Nordic Countries, OECD, Philippines, South Korea, Taiwan, Thailand, United States, Vietnam	1000	100	100000	1000	101000		1					1	1	0.5	1	1	1	0		1	4.5	1	high	1	Rotterdam Convention (EU PIC List), EU REACH Restriction, EU REACH Authorisation, EU REACH SVHC, EU Toys directive, Korea REACH Authorisation		0	0	0	0
9	'56-35-9	Distannoxane, 1,1,1,3,3,3-hexabutyl-	APQHKWPGGHMYKJ-UHFFFAOYSA-N	InChI=1S/6C4H9.O.2Sn/c6*1-3-4-2;;;/h6*1,3-4H2,2H3;;;	CCCC[Sn](CCCC)(CCCC)O[Sn](CCCC)(CCCC)CCCC	C24 H54 O Sn2	598.222		1353053-96-9	Antioxidant, Biocide, Catalyst, Crosslinking Agent, Intermediates, Light Stabilizer	Other - Bioplastic, Other - Rubber, Other - Thermoplastic, PUR, PVC	Agriculture, Automotive, Building & Construction, Electrical and Electronic Equipment, Household items, furniture and other, Packaging, Textiles	0	15	Canada, China, EU, Japan, Mexico, New Zealand, Nordic Countries, OECD, Philippines, Russia, South Korea, Taiwan, Thailand, United States, Vietnam		10	-1	1000	1000	1	0	1	0	1	0	1	0	0	1	1	1	0		3	5	1	high	1	Rotterdam Convention, Rotterdam Convention (EU PIC List), EU REACH SVHC, EU Toys directive, Japan CSCL Class I Restriction, Korea REACH Restriction, Korea REACH Authorisation	USA Food Contact Materials Positive List (GRAS)	1	0	1	0
15	'1461-22-9	Stannane, tributylchloro-	GCTFWCDSFPMHHS-UHFFFAOYSA-M	InChI=1S/3C4H9.ClH.Sn/c3*1-3-4-2;;/h3*1,3-4H2,2H3;1H;/q;;;;+1/p-1	CCCC[Sn](Cl)(CCCC)CCCC	C12 H27 Cl Sn	326.082			Antioxidant, Biocide, Catalyst, Light Stabilizer, Other Processing Aids	PUR, PVC	Agriculture, Automotive, Building & Construction, Household items, furniture and other, Packaging, Textiles	0	12	Canada, China, EU, Japan, Nordic Countries, Philippines, Russia, South Korea, Taiwan, Thailand, United States, Vietnam		0	10000		10000	0.5	0.5	0.5	0.5	0.5	0.5	1	0	0.5	1	1	1	0		1	3.5	1	high	1	Rotterdam Convention, Rotterdam Convention (EU PIC List), EU Toys directive, Japan CSCL Class II Authorisation, Korea REACH Restriction, Korea REACH Authorisation	USA Food Contact Materials Positive List (GRAS)	1	0	1	0
22	'74-87-3	Methane, chloro-	NEHMKBQYUWJMIP-UHFFFAOYSA-N	InChI=1S/CH3Cl/c1-2/h1H3	CCl	C H3 Cl	49.9923		16786-44-0, 1173018-35-3, 1474045-09-4, 1474045-10-7, 1474045-11-8	Blowing Agent, Colorant, Intermediates, Other Processing Aids	HDPE, LDPE, Other - Bioplastic, PP, PS, PUR		0	15	Canada, China, EU, Japan, Malaysia, Mexico, Nordic Countries, OECD, Philippines, Russia, South Korea, Taiwan, Thailand, United States, Vietnam	1000000	1000	10000000	1000	11000000		1					1	0.5	1	1	1	0	0		1	3.5	1	high	1	Montreal Protocol (EU), USA - California Proposition 65, Korea REACH Authorisation		0	0	0	0
26	'75-37-6	Ethane, 1,1-difluoro-	NPNPZTNLOVBDOC-UHFFFAOYSA-N	InChI=1S/C2H4F2/c1-2(3)4/h2H,1H3	CC(F)F	C2 H4 F2	66.0281		71281-71-5	Biocide, Blowing Agent, Colorant, Filler, Light Stabilizer, Lubricant, Odor Agent, Other Processing Aids	PS, PUR	Automotive, Building & Construction, Electrical and Electronic Equipment, Food-contact plastics, Household items, furniture and other, Packaging, Textiles, Toys	1	14	Canada, China, EU, Japan, Mexico, Nordic Countries, OECD, Philippines, South Korea, Taiwan, Thailand, Turkey, United States, Vietnam	1000	1000	100000	1000	101000		1					1	1	1	0	0	0	0		1	2	1	high	1	Monteal Protocol	EU Food Contact Materials Positive List, USA Food Contact Materials Positive List (GRAS), Japan Food Contact Materials Postiive List	1	1	1	1
33	'7440-43-9	Cadmium	BDOSMKKIYDKNTQ-UHFFFAOYSA-N	InChI=1S/Cd	[Cd]	Cd	113.903			Biocide, Catalyst, Colorant, Crosslinking Agent, Filler, Heat Stabilizer, Light Stabilizer, Other Processing Aids	ABS, EPS, HDPE, HIPS, LDPE, Other - Bioplastic, Other - Thermoplastic, PA, PC, PET, PP, PS, PUR, PVC	Agriculture, Automotive, Building & Construction, Electrical and Electronic Equipment, Household items, furniture and other, Packaging, Textiles, Toys	0	14	Canada, China, EU, Malaysia, Mexico, New Zealand, Nordic Countries, OECD, Philippines, Russia, South Korea, Taiwan, United States, Vietnam	10000	100	10000	1000	20000		1					1	1	1	0.5	1	1	0		1	4.5	1	high	1	Rotterdam Convention (EU PIC List), EU REACH Restriction, EU REACH SVHC, EU RoHS directive, EU Toys directive, Korea REACH Restriction		0	0	0	0
40	'1306-19-0	Cadmium oxide (CdO)	CFEAAQFZALKQPA-UHFFFAOYSA-N	InChI=1S/Cd.O/q+2;-2	[O--].[Cd++]	Cd O	129.898		1436666-97-5	Antioxidant, Colorant, Flame Retardant, Heat Stabilizer, Light Stabilizer	ABS, EPS, HDPE, HIPS, LDPE, Other - Bioplastic, Other - Rubber, Other - Thermoplastic, PA, PC, PET, PP, PS, PUR, PVC	Agriculture, Automotive, Building & Construction, Electrical and Electronic Equipment, Household items, furniture and other, Packaging, Textiles, Toys	0	14	Canada, China, EU, Japan, Mexico, Nordic Countries, OECD, Philippines, South Korea, Taiwan, Thailand, Turkey, United States, Vietnam	10000	100	10000	1000	20000		1					1	1	1	0.5	1	1	0		1	4.5	1	high	1	Rotterdam Convention (EU PIC List), EU REACH Restriction, EU REACH SVHC, EU RoHS directive, EU Toys directive, Korea REACH Authorisation		0	0	0	0
43	'10588-01-9	Chromic acid (H2Cr2O7), sodium salt (1:2)	KIEOKOFEPABQKJ-UHFFFAOYSA-N	InChI=1S/2Cr.2Na.7O/q;;2*+1;;;;;;2*-1	[Na+].[Na+].[O-][Cr](=O)(=O)O[Cr]([O-])(=O)=O	Cr2 H2 O7 . 2 Na	261.825		12018-32-5, 1018900-84-9, 1088355-13-8, 1391351-00-0	Biocide, Catalyst, Colorant, Filler, Intermediates, Other Processing Aids	HDPE, LDPE, Other - Thermoplastic, PA, PET, PP, PVC	Automotive, Building & Construction, Electrical and Electronic Equipment, Packaging, Textiles	0	15	Canada, China, EU, Japan, Malaysia, Mexico, Nordic Countries, OECD, Philippines, South Korea, Taiwan, Thailand, Turkey, United States, Vietnam	1000	100	1000000	1000	1001000		1					1	1	1	1	1	1	1		1	5	1	high	1	EU RoHS directive, EU Toys directive, Korea REACH Restriction, Korea REACH Authorisation		0	0	0	0
44	'7789-09-5	Chromic acid (H2Cr2O7), ammonium salt (1:2)	JOSWYUNQBRPBDN-UHFFFAOYSA-P	InChI=1S/2Cr.2H3N.7O/h;;2*1H3;;;;;;;/q;;;;;;;;;2*-1/p+2	[NH4+].[NH4+].[O-][Cr](=O)(=O)O[Cr]([O-])(=O)=O	Cr2 H2 O7 . 2 H3 N	251.914			Catalyst, Colorant	HDPE, LDPE, PP, PVC	Building & Construction, Electrical and Electronic Equipment, Packaging	0	13	Canada, China, EU, Japan, Mexico, Nordic Countries, OECD, Philippines, South Korea, Taiwan, Thailand, United States, Vietnam		0		1000	1000		1					1	1	1	1	1	1	1		1	5	1	high	1	EU REACH Authorisation, EU REACH SVHC, EU RoHS directive, Korea REACH Restriction, Korea REACH Authorisation		0	0	0	0
47	'7789-06-2	Chromic acid (H2CrO4), strontium salt (1:1)	NVKTUNLPFJHLCG-UHFFFAOYSA-N	InChI=1S/Cr.4O.Sr/q;;;2*-1;+2	[Sr++].[O-][Cr]([O-])(=O)=O	Cr H2 O4 . Sr	203.826		54322-60-0, 166269-55-2	Catalyst, Colorant, Filler, Other Processing Aids	HDPE, LDPE, PP, PVC	Building & Construction, Electrical and Electronic Equipment, Packaging	0	16	Canada, China, EU, Japan, Malaysia, Mexico, Nordic Countries, OECD, Philippines, Russia, South Korea, Taiwan, Thailand, Turkey, United States, Vietnam	10000	1000	10000	1000	20000		1					1	1	1	0.5	1	1	1		1	4.5	1	high	1	EU REACH Authorisation, EU REACH SVHC, EU RoHS directive, EU Toys directive, Korea REACH Restriction, Korea REACH Authorisation		0	0	0	0
49	'1308-38-9	Chromium oxide (Cr2O3)	QDOXWKRWXJOMAK-UHFFFAOYSA-N	InChI=1S/2Cr.3O	O=[Cr]O[Cr]=O	Cr2 O3	151.866		12689-83-7, 144855-63-0, 164057-73-2, 165589-75-3, 185464-26-0, 196696-68-1, 294202-64-5, 499126-69-1, 960246-23-5, 1093852-36-8, 1229022-62-1, 1610419-57-2	Catalyst, Colorant, Crosslinking Agent, Filler, Initiator, Intermediates, Other Processing Aids	ABS, EPS, HDPE, HIPS, LDPE, Other - Bioplastic, Other - Thermoplastic, PA, PC, PET, PP, PS, PUR, PVC	Agriculture, Automotive, Building & Construction, Electrical and Electronic Equipment, Food-contact plastics, Household items, furniture and other, Packaging, Textiles, Toys	1	16	Canada, China, EU, Japan, Malaysia, Mexico, Nordic Countries, OECD, Philippines, Russia, South Korea, Taiwan, Thailand, Turkey, United States, Vietnam	10000	1000	100000	1000	110000		1					1	0	0	1	1	1	1		1	3	1	high	0		USA Food Contact Materials Positive List (GRAS), Japan Food Contact Materials Postiive List	1	0	1	1
50	'7738-94-5	Chromic acid (H2CrO4)	KRVSOGSZCMJSLX-UHFFFAOYSA-L	InChI=1S/Cr.2H2O.2O/h;2*1H2;;/q+2;;;;/p-2	O[Cr](O)(=O)=O	Cr H2 O4	117.936		9044-10-4, 11115-74-5, 24934-60-9, 199384-58-2, 237391-94-5	Biocide, Catalyst, Colorant	HDPE, LDPE, PP, PVC	Building & Construction, Electrical and Electronic Equipment, Packaging	0	11	Canada, China, EU, Mexico, Nordic Countries, Philippines, South Korea, Taiwan, Thailand, United States, Vietnam		10	1000		1010		1					1	1	1	1	1	1	1		1	5	1	high	1	EU REACH Authorisation, EU REACH SVHC, Korea REACH Restriction		0	0	0	0
51	'7775-11-3	Chromic acid (H2CrO4), sodium salt (1:2)	PXLIDIMHPNPGMH-UHFFFAOYSA-N	InChI=1S/Cr.2Na.4O/q;2*+1;;;2*-1	[Na+].[Na+].[O-][Cr]([O-])(=O)=O	Cr H2 O4 . 2 Na	161.9			Catalyst, Colorant, Crosslinking Agent, Initiator, Intermediates, Lubricant	HDPE, LDPE, PP, PVC	Building & Construction, Electrical and Electronic Equipment, Packaging	0	14	Canada, China, EU, Japan, Mexico, Nordic Countries, OECD, Philippines, Russia, South Korea, Taiwan, Thailand, United States, Vietnam	10	10		1000	1000		1					1	1	1	1	1	1	1		1	5	1	high	1	EU REACH Authorisation, EU REACH SVHC, EU RoHS directive, Korea REACH Restriction, Korea REACH Authorisation	USA Food Contact Materials Positive List (GRAS)	1	0	1	0
53	'10294-40-3	Chromic acid (H2CrO4), barium salt (1:1)	QFFVPLLCYGOFPU-UHFFFAOYSA-N	InChI=1S/Ba.Cr.4O/q+2;;;;2*-1	[Ba++].[O-][Cr]([O-])(=O)=O	Ba . Cr H2 O4	253.825		12000-34-9, 12231-18-4	Catalyst, Colorant	HDPE, LDPE, PP, PVC	Building & Construction, Electrical and Electronic Equipment, Packaging	0	12	Canada, China, EU, Japan, Mexico, New Zealand, Nordic Countries, Philippines, South Korea, Taiwan, United States, Vietnam	100	10	10000		10100		1					1	1	1	0.5	1	1	1		1	4.5	1	high	1	EU RoHS directive, EU Toys directive, Korea REACH Restriction, Korea REACH Authorisation		0	0	0	0
58	'11103-86-9	Potassium zinc chromate hydroxide (KZn2(CrO4)2(OH))	GQKCRUJOPUHISR-UHFFFAOYSA-M	InChI=1S/2Cr.K.H2O.8O.2Zn/h;;;1H2;;;;;;;;;;/q;;+1;;;;;;4*-1;2*+2/p-1	[OH-].[K+].[Zn++].[Zn++].[O-][Cr]([O-])(=O)=O.[O-][Cr]([O-])(=O)=O	Cr O4 . H O . K . Zn	415.665		12527-08-1, 37809-34-0	Catalyst, Colorant, Lubricant	HDPE, LDPE, PP, PUR, PVC	Building & Construction, Electrical and Electronic Equipment, Packaging	0	12	Canada, China, EU, New Zealand, Nordic Countries, OECD, Philippines, Russia, South Korea, Taiwan, United States, Vietnam	1000	1	100	1000	1100		1					1	1	0.5	0.5	0.5	1	1		1	3.5	1	high	1	EU REACH Authorisation, EU REACH SVHC, EU RoHS directive, EU Toys directive, Korea REACH Restriction, Korea REACH Authorisation		0	0	0	0
59	'1333-82-0	Chromium oxide (CrO3)	WGLPBDUCMAPZCE-UHFFFAOYSA-N	InChI=1S/Cr.3O	O=[Cr](=O)=O	Cr O3	99.9253		12324-05-9, 12324-08-2, 1362947-20-3	Biocide, Catalyst, Colorant, Crosslinking Agent, Initiator, Intermediates, Other Processing Aids	HDPE, LDPE, PP, PVC	Automotive, Building & Construction, Electrical and Electronic Equipment, Packaging, Textiles	0	16	Canada, China, EU, Japan, Malaysia, Mexico, Nordic Countries, OECD, Philippines, Russia, South Korea, Taiwan, Thailand, Turkey, United States, Vietnam	100000	1000	1000000	1000	1100000	0.5	0.5	0.5	0.5	0.5	0.5	1	1	1	1	1	1	1		1	5	1	high	1	EU REACH Authorisation, EU REACH SVHC, EU RoHS directive, EU Toys directive, Korea REACH Restriction, Korea REACH Authorisation		0	0	0	0
60	'71-48-7	Acetic acid, cobalt(2+) salt (2:1)	QAHREYKOYSIQPH-UHFFFAOYSA-L	InChI=1S/2C2H4O2.Co/c2*1-2(3)4;/h2*1H3,(H,3,4);/q;;+2/p-2	[Co++].CC([O-])=O.CC([O-])=O	C2 H4 O2 . 1/2 Co	176.96		33327-32-1, 68279-06-1, 73005-84-2, 256431-41-1	Catalyst, Colorant, Crosslinking Agent, Initiator, Intermediates, Lubricant, Other Processing Aids	PET	Agriculture, Automotive, Building & Construction, Electrical and Electronic Equipment, Food-contact plastics, Packaging, Textiles	1	13	Canada, China, EU, Mexico, Nordic Countries, OECD, Philippines, Russia, South Korea, Taiwan, Thailand, United States, Vietnam	1000	10	10000	1000	11000		1					1	1	0.5	1	1	1	1		1	4.5	1	high	1	EU REACH SVHC, EU Toys directive	USA Food Contact Materials Positive List (GRAS)	1	0	1	0
61	'75-74-1	Plumbane, tetramethyl-	XOOGZRUBTYCLHG-UHFFFAOYSA-N	InChI=1S/4CH3.Pb/h4*1H3;	C[Pb](C)(C)C	C4 H12 Pb	268.071				ABS, EPS, HDPE, HIPS, LDPE, Other - Bioplastic, Other - Thermoplastic, PA, PC, PET, PP, PS, PUR, PVC	Building & Construction, Electrical and Electronic Equipment, Packaging	0	11	Canada, China, EU, Japan, Mexico, Nordic Countries, OECD, Philippines, Russia, South Korea, United States		0		1000	1000		1					1	0.5	0	1	1	1	0		1	3.5	1	high	1	Rotterdam Convention, Rotterdam Convention (EU PIC List), EU RoHS directive, EU Toys directive, Korea REACH Authorisation		0	0	0	0
62	'78-00-2	Plumbane, tetraethyl-	MRMOZBOQVYRSEM-UHFFFAOYSA-N	InChI=1S/4C2H5.Pb/c4*1-2;/h4*1H2,2H3;	CC[Pb](CC)(CC)CC	C8 H20 Pb	324.133			Light Stabilizer, Lubricant	ABS, EPS, HDPE, HIPS, LDPE, Other - Bioplastic, Other - Thermoplastic, PA, PC, PET, PP, PS, PUR, PVC	Building & Construction, Electrical and Electronic Equipment, Packaging	0	12	Canada, China, EU, Japan, Mexico, Nordic Countries, OECD, Philippines, Russia, South Korea, Taiwan, United States	10000	10	10000	1000	20000		1					1	0.5	0	1	1	1	0		1	3.5	1	high	1	Rotterdam Convention, Rotterdam Convention (EU PIC List), EU REACH SVHC, EU RoHS directive, EU Toys directive, Korea REACH Authorisation		0	0	0	0
64	'1072-35-1	Octadecanoic acid, lead(2+) salt (2:1)	XVJPDGIUIMSVPU-UHFFFAOYSA-L	InChI=1S/2C18H36O2.Pb.2H/c2*1-2-3-4-5-6-7-8-9-10-11-12-13-14-15-16-17-18(19)20;;;/h2*2-17H2,1H3,(H,19,20);;;/q;;+2;;/p-2	[PbH2++].CCCCCCCCCCCCCCCCCC([O-])=O.CCCCCCCCCCCCCCCCCC([O-])=O	C18 H36 O2 . 1/2 Pb	776.52		11097-78-2, 37223-82-8	Antioxidant, Heat Stabilizer, Light Stabilizer, Lubricant, Other Processing Aids	ABS, EPS, HDPE, HIPS, LDPE, Other - Bioplastic, Other - Thermoplastic, PA, PC, PET, PP, PS, PUR, PVC	Automotive, Building & Construction, Electrical and Electronic Equipment, Food-contact plastics, Packaging	1	15	Canada, China, EU, Malaysia, Mexico, Nordic Countries, OECD, Philippines, Russia, South Korea, Taiwan, Thailand, Turkey, United States, Vietnam		100		1000	1000		1					1	1	0.5	1	1	1	0		1	4.5	1	high	1	Rotterdam Convention (EU PIC List), EU RoHS directive, EU Toys directive		0	0	0	0
65	'1314-41-6	Lead oxide (Pb3O4)	WEXOYNJOHFQTBM-UHFFFAOYSA-N	InChI=1S/4O.3Pb.2H	O1[PbH]2O[PbH]1O[Pb]O2	O4 Pb3	689.925		12684-34-3, 940949-96-2	Colorant, Filler, Heat Stabilizer, Intermediates, Light Stabilizer	ABS, EPS, HDPE, HIPS, LDPE, Other - Bioplastic, Other - Thermoplastic, PA, PC, PET, PP, PS, PUR, PVC	Automotive, Building & Construction, Electrical and Electronic Equipment, Packaging	0	16	Canada, China, EU, Japan, Mexico, New Zealand, Nordic Countries, OECD, Philippines, Russia, South Korea, Taiwan, Thailand, Turkey, United States, Vietnam	100000	100	100000	1000	200000		1					1	0.5	0.5	1	1	1	0		1	4	1	high	1	Rotterdam Convention (EU PIC List), EU REACH SVHC, EU RoHS directive, EU Toys directive		0	0	0	0
66	'1317-36-8	Lead oxide (PbO)	MQZBBIXFDYLEGH-UHFFFAOYSA-N	InChI=1S/O.Pb.2H/q-2;+2;;	[O--].[PbH2++]	O Pb	225.987		1309-59-7, 12359-23-8	Colorant, Filler, Heat Stabilizer, Intermediates, Light Stabilizer, Lubricant, Other Processing Aids	ABS, EPS, HDPE, HIPS, LDPE, Other - Bioplastic, Other - Thermoplastic, PA, PC, PET, PP, PS, PUR, PVC	Agriculture, Automotive, Building & Construction, Electrical and Electronic Equipment, Household items, furniture and other, Packaging, Textiles	0	16	Canada, China, EU, Japan, Malaysia, Mexico, Nordic Countries, OECD, Philippines, Russia, South Korea, Taiwan, Thailand, Turkey, United States, Vietnam	1000000	1000	1000000	1000	2000000		1					1	0.5	0.5	1	1	1	0		1	4	1	high	1	Rotterdam Convention (EU PIC List), EU REACH SVHC, EU RoHS directive, EU Toys directive		0	0	0	0
67	'1319-46-6	Lead carbonate hydroxide (Pb3(CO3)2(OH)2)	RZCMDZAYEFUPDZ-UHFFFAOYSA-H	InChI=1S/2CH2O3.2H2O.3Pb.6H/c2*2-1(3)4;;;;;;;;;;;/h2*(H2,2,3,4);2*1H2;;;;;;;;;/q;;;;3*+2;;;;;;/p-6	[OH-].[OH-].[PbH2++].[PbH2++].[PbH2++].[O-]C([O-])=O.[O-]C([O-])=O	C O3 . H O . Pb	783.952		1344-36-1, 11120-55-1, 13009-77-3, 37185-13-0, 37316-84-0, 37361-76-5, 886883-98-3, 1145660-51-0, 1160353-52-5, 1951408-54-0	Colorant, Heat Stabilizer	ABS, EPS, HDPE, HIPS, LDPE, Other - Bioplastic, Other - Thermoplastic, PA, PC, PET, PP, PS, PUR, PVC	Building & Construction, Electrical and Electronic Equipment, Packaging	0	12	Canada, China, EU, Japan, Mexico, New Zealand, Nordic Countries, Philippines, South Korea, Taiwan, United States, Vietnam	100	10	1000		1100		1					1	0.5	0.5	1	0.5	1	0		1	3.5	1	high	1	Rotterdam Convention (EU PIC List), EU REACH Restriction, EU REACH SVHC, EU RoHS directive, EU Toys directive		0	0	0	0
71	'7439-92-1	Lead	WABPQHHGFIMREM-UHFFFAOYSA-N	InChI=1S/Pb	[Pb]	Pb	207.977		724427-66-1	Antioxidant, Colorant, Crosslinking Agent, Filler, Heat Stabilizer, Intermediates, Light Stabilizer, Lubricant, Other Processing Aids	ABS, EPS, HDPE, HIPS, LDPE, Other - Bioplastic, Other - Thermoplastic, PA, PC, PET, PP, PS, PUR, PVC	Agriculture, Automotive, Building & Construction, Electrical and Electronic Equipment, Household items, furniture and other, Hygiene and Medical items, Packaging, Textiles, Toys	0	13	Canada, China, EU, Malaysia, Mexico, Nordic Countries, OECD, Philippines, South Korea, Taiwan, Turkey, United States, Vietnam	10000000	10000	10000000	1000	20000000	0.5	0.5	0.5	0.5	0.5	0.5	1	1	0.5	1	1	1	0		1	4.5	1	high	1	EU REACH Restriction, EU REACH SVHC, EU RoHS directive, EU Toys directive, Korea REACH Restriction		0	0	0	0
72	'7446-14-2	Sulfuric acid, lead(2+) salt (1:1)	KEQXNNJHMWSZHK-UHFFFAOYSA-L	InChI=1S/H2O4S.Pb/c1-5(2,3)4;/h(H2,1,2,3,4);/q;+2/p-2	[Pb++].[O-]S([O-])(=O)=O	H2 O4 S . Pb	303.928	15739-80-7, 31044-02-7	12673-93-7, 37223-83-9, 37224-42-3, 37251-28-8	Antioxidant, Colorant, Light Stabilizer, Other Processing Aids	ABS, EPS, HDPE, HIPS, LDPE, Other - Bioplastic, Other - Thermoplastic, PA, PC, PET, PP, PS, PUR, PVC	Automotive, Building & Construction, Electrical and Electronic Equipment, Food-contact plastics, Household items, furniture and other, Packaging	1	14	Canada, China, EU, Japan, Mexico, Nordic Countries, OECD, Philippines, Russia, South Korea, Taiwan, Thailand, United States, Vietnam		10	1000000	1000	1000010		1					1	1	0.5	1	1	1	0		1	4.5	1	high	1	Rotterdam Convention (EU PIC List), EU REACH Restriction, EU RoHS directive, EU Toys directive		0	0	0	0
74	'7758-95-4	Lead chloride (PbCl2)	HWSZZLVAJGOAAY-UHFFFAOYSA-L	InChI=1S/2ClH.Pb/h2*1H;/q;;+2/p-2	Cl[Pb]Cl	Cl2 Pb	277.914			Antioxidant, Colorant, Light Stabilizer	ABS, EPS, HDPE, HIPS, LDPE, Other - Bioplastic, Other - Thermoplastic, PA, PC, PET, PP, PS, PUR, PVC	Building & Construction, Electrical and Electronic Equipment, Packaging	0	13	Canada, China, EU, Japan, Mexico, Nordic Countries, Philippines, Russia, South Korea, Taiwan, Thailand, United States, Vietnam	1000	0	10000		11000		1					1	1	0.5	1	1	1	0		1	4.5	1	high	1	Rotterdam Convention (EU PIC List), EU RoHS directive, EU Toys directive		0	0	0	0
75	'12141-20-7	Lead oxide phosphonate (Pb3O2(HPO3))	VAOOPULOMAMBPQ-UHFFFAOYSA-L	InChI=1S/H3O3P.2O.3Pb.2H/c1-4(2)3;;;;;;;/h4H,(H2,1,2,3);;;;;;;/q;;;;;+2;;/p-2	[PbH2++].O=[Pb].O=[Pb].[O-]P([O-])=O	H O3 P . O . Pb	737.902			Antioxidant, Colorant, Heat Stabilizer, Light Stabilizer, Lubricant, Other Processing Aids	ABS, EPS, HDPE, HIPS, LDPE, Other - Bioplastic, Other - Thermoplastic, PA, PC, PET, PP, PS, PUR, PVC	Automotive, Building & Construction, Electrical and Electronic Equipment, Packaging	0	14	Canada, China, EU, Malaysia, New Zealand, Nordic Countries, OECD, Philippines, South Korea, Taiwan, Thailand, Turkey, United States, Vietnam	10000	100	100	1000	10100		1					1	0.5	0.5	1	1	1	0		1	4	1	high	1	Rotterdam Convention (EU PIC List), EU REACH SVHC, EU RoHS directive, EU Toys directive		0	0	0	0
78	'15245-44-0	1,3-Benzenediol, 2,4,6-trinitro-, lead(2+) salt (1:1)	WETZJIOEDGMBMA-UHFFFAOYSA-L	InChI=1S/C6H3N3O8.Pb/c10-5-2(7(12)13)1-3(8(14)15)6(11)4(5)9(16)17;/h1,10-11H;/q;+2/p-2	[Pb++].[O-]C1=C(C([O-])=C(C=C1[N+]([O-])=O)[N+]([O-])=O)[N+]([O-])=O	C6 H3 N3 O8 . Pb	450.953		4219-19-6, 6594-85-0, 59286-40-7, 63918-97-8	Initiator	ABS, EPS, HDPE, HIPS, LDPE, Other - Bioplastic, Other - Thermoplastic, PA, PC, PET, PP, PS, PUR, PVC	Building & Construction, Electrical and Electronic Equipment, Packaging	0	8	Canada, EU, Japan, Mexico, Nordic Countries, South Korea, Taiwan, United States	100	0	1000		1100		1					1	1	0.5	1	1	1	0		1	4.5	1	high	1	Rotterdam Convention (EU PIC List), EU REACH SVHC, EU RoHS directive, EU Toys directive		0	0	0	0
86	'7758-97-6	Chromic acid (H2CrO4), lead(2+) salt (1:1)	MOUPNEIJQCETIW-UHFFFAOYSA-N	InChI=1S/Cr.4O.Pb/q;;;2*-1;+2	[Pb++].[O-][Cr]([O-])(=O)=O	Cr H2 O4 . Pb	323.897		8049-64-7, 181768-98-9, 2244671-11-0	Catalyst, Colorant, Light Stabilizer	ABS, EPS, HDPE, HIPS, LDPE, Other - Bioplastic, Other - Thermoplastic, PA, PC, PET, PP, PS, PUR, PVC	Agriculture, Automotive, Building & Construction, Electrical and Electronic Equipment, Household items, furniture and other, Packaging, Textiles	0	16	Canada, China, EU, Japan, Malaysia, Mexico, Nordic Countries, OECD, Philippines, Russia, South Korea, Taiwan, Thailand, Turkey, United States, Vietnam		100	-1	1000	1000		1					1	1	0.5	1	1	1	1		1	4.5	1	high	1	Rotterdam Convention (EU PIC List), EU REACH Authorisation, EU REACH SVHC, EU RoHS directive, EU Toys directive, Korea REACH Restriction, Korea REACH Authorisation		0	0	0	0
87	'12656-85-8	C.I. Pigment Red 104	YXGRUQPALKRXIZ-UHFFFAOYSA-L	InChI=1S/Cr.Mo.H2O4S.8O.3Pb.6H/c;;1-5(2,3)4;;;;;;;;;;;;;;;;;/h;;(H2,1,2,3,4);;;;;;;;;;;;;;;;;/q;;;;;;;4*-1;3*+2;;;;;;/p-2	[PbH2++].[PbH2++].[PbH2++].[O-]S([O-])(=O)=O.[O-][Cr]([O-])(=O)=O.[O-][Mo]([O-])(=O)=O	Unspecified	1003.73		8005-36-5, 12213-61-5, 64523-06-4	Catalyst, Colorant, Light Stabilizer, Lubricant, Other Processing Aids	ABS, EPS, HDPE, HIPS, LDPE, Other - Bioplastic, Other - Rubber, Other - Thermoplastic, PA, PC, PET, PP, PS, PUR, PVC	Automotive, Building & Construction, Electrical and Electronic Equipment, Packaging, Textiles	0	14	Canada, China, EU, Japan, Malaysia, Mexico, Nordic Countries, OECD, Philippines, South Korea, Taiwan, Turkey, United States, Vietnam	10000	1000	1000	1000	11000		1					1	1	0.5	1	1	1	1		1	4.5	1	high	1	Rotterdam Convention (EU PIC List), EU REACH Authorisation, EU REACH SVHC, EU RoHS directive, EU Toys directive		0	0	0	0
88	'1344-37-2	C.I. Pigment Yellow 34	KUAYCHYPUWBYFY-UHFFFAOYSA-L	InChI=1S/Cr.H2O4S.4O.2Pb.4H/c;1-5(2,3)4;;;;;;;;;;/h;(H2,1,2,3,4);;;;;;;;;;/q;;;;2*-1;2*+2;;;;/p-2	[PbH2++].[PbH2++].[O-]S([O-])(=O)=O.[O-][Cr]([O-])(=O)=O	Unspecified	631.856		8012-76-8, 61513-05-1, 61513-06-2, 61513-07-3, 81209-53-2	Catalyst, Colorant, Light Stabilizer, Other Processing Aids	ABS, EPS, HDPE, HIPS, LDPE, Other - Bioplastic, Other - Thermoplastic, PA, PC, PET, PP, PS, PUR, PVC	Automotive, Building & Construction, Electrical and Electronic Equipment, Packaging, Textiles	0	15	Canada, China, EU, Japan, Mexico, Nordic Countries, OECD, Philippines, Russia, South Korea, Taiwan, Thailand, Turkey, United States, Vietnam	10000	1000	10000	1000	20000		1					1	1	0.5	1	1	1	1		1	4.5	1	high	1	Rotterdam Convention (EU PIC List), EU REACH Authorisation, EU REACH SVHC, EU RoHS directive, EU Toys directive		0	0	0	0
97	'7439-97-6	Mercury	QSHDDOUJBYECFT-UHFFFAOYSA-N	InChI=1S/Hg	[Hg]	Hg	201.971		8030-64-6, 8031-27-4, 51887-47-9, 92355-34-5, 92786-62-4, 123720-03-6, 149038-91-5	Catalyst, Colorant, Crosslinking Agent, Filler, Other Processing Aids	ABS, EPS, HDPE, HIPS, LDPE, Other - Bioplastic, Other - Thermoplastic, PA, PC, PET, PP, PS, PUR, PVC	Building & Construction, Electrical and Electronic Equipment, Packaging	0	13	Canada, China, EU, Mexico, Nordic Countries, OECD, Philippines, Russia, South Korea, Taiwan, Thailand, United States, Vietnam	1000	10	10000	1000	11000		1					1	0	0.5	1	1	1	0		1	3.5	1	high	1	Rotterdam Convention (EU PIC List), EU RoHS directive, EU Toys directive, Korea REACH Authorisation		0	0	0	0
108	'10043-35-3	Boric acid (H3BO3)	KGBXLFKZBHKPEV-UHFFFAOYSA-N	InChI=1S/BH3O3/c2-1(3)4/h2-4H	OB(O)O	B H3 O3	62.0175	11113-50-1	12795-04-9, 30698-98-7, 2253722-08-4	Antioxidant, Biocide, Colorant, Filler, Flame Retardant, Heat Stabilizer, Intermediates, Lubricant, Monomer, Other Processing Aids	Other - Rubber, Other - Thermoplastic, PS, PVC	Agriculture, Automotive, Building & Construction, Electrical and Electronic Equipment, Food-contact plastics, Household items, furniture and other, Hygiene and Medical items, Packaging, Textiles, Toys	1	16	Canada, China, EU, Japan, Malaysia, Mexico, New Zealand, Nordic Countries, OECD, Philippines, South Korea, Taiwan, Thailand, Turkey, United States, Vietnam	1000000	10000	1000000	1000	2000000		1					1	0	0	1	1	0	0		1	2	1	high	1	EU REACH SVHC, EU Toys directive	EU Food Contact Materials Positive List, USA Food Contact Materials Positive List (GRAS), Japan Food Contact Materials Postiive List	1	1	1	1
111	'32536-52-0	Benzene, 1,1'-oxybis-, octabromo deriv.			[*]C1=C([*])C([*])=C(OC2=C([*])C([*])=C([*])C([*])=C2[*])C([*])=C1[*] |$_R1;;;_R1;;_R1;;;;;_R1;;_R1;;_R1;;_R1;;_R1;;_R1;;_R1$,c:1,8,16,21,t:5,12,lp:7:2,RG:_R1={Br* |$;_AP1$,lp:0:2|},LOG={_R1:;H;8}|	C12 H2 Br8 O			1240017-47-3	Flame Retardant	ABS, EPS, HDPE, HIPS, LDPE, Other - Thermoplastic, PA, PP, PS, PUR	Automotive, Building & Construction, Electrical and Electronic Equipment, Household items, furniture and other, Packaging, Textiles, Toys	0	12	Canada, China, EU, New Zealand, Nordic Countries, OECD, Philippines, Russia, South Korea, Taiwan, United States, Vietnam		0		1000	1000		1					1	0	0	1	1	0	0		1	2	1	high	1	Rotterdam Convention, Rotterdam Convention (EU PIC List), EU RoHS directive, Korea REACH Restriction		0	0	0	0
112	'1163-19-5	Benzene, 1,1'-oxybis[2,3,4,5,6-pentabromo-	WHHGLZMJPXIBIX-UHFFFAOYSA-N	InChI=1S/C12Br10O/c13-1-3(15)7(19)11(8(20)4(1)16)23-12-9(21)5(17)2(14)6(18)10(12)22	BrC1=C(Br)C(Br)=C(OC2=C(Br)C(Br)=C(Br)C(Br)=C2Br)C(Br)=C1Br	C12 Br10 O	949.178		109945-70-2, 145538-74-5, 1201677-32-8	Biocide, Colorant, Filler, Flame Retardant, Heat Stabilizer, Intermediates, Lubricant, Odor Agent, Other Processing Aids	ABS, EPS, HDPE, HIPS, LDPE, Other - Rubber, Other - Thermoplastic, PA, PC, PET, PP, PS, PUR, PVC	Automotive, Building & Construction, Electrical and Electronic Equipment, Household items, furniture and other, Packaging, Textiles, Toys	0	14	Canada, China, EU, Japan, Mexico, Nordic Countries, OECD, Philippines, South Korea, Taiwan, Thailand, Turkey, United States, Vietnam	10000	10	100000	1000	110000	1	1	1	1	1	1	1	0.5	0.5	1	0.5	0	0		3	4.5	1	high	1	Stockholm Convention, Stockholm Convention (EU POP List), EU REACH Restriction, EU REACH SVHC, EU RoHS directive, Japan CSCL Class I Restriction		0	0	0	0
113	'79-94-7	Phenol, 4,4'-(1-methylethylidene)bis[2,6-dibromo-	VEORPZCZECFIRK-UHFFFAOYSA-N	InChI=1S/C15H12Br4O2/c1-15(2,7-3-9(16)13(20)10(17)4-7)8-5-11(18)14(21)12(19)6-8/h3-6,20-21H,1-2H3	CC(C)(C1=CC(Br)=C(O)C(Br)=C1)C1=CC(Br)=C(O)C(Br)=C1	C15 H12 Br4 O2	539.757	25639-54-7, 26446-62-8, 121839-52-9	7300-23-4, 30496-13-0, 51253-31-7, 76341-26-9, 107719-55-1, 108608-60-2, 110670-65-0, 124779-54-0, 131891-38-8, 186673-39-2, 224951-26-2	Flame Retardant, Intermediates, Other Processing Aids	ABS, EPS, HDPE, HIPS, LDPE, Other - Rubber, Other - Thermoplastic, PA, PC, PET, PP, PS, PUR, PVC	Automotive, Building & Construction, Electrical and Electronic Equipment, Household items, furniture and other, Packaging, Textiles, Toys	0	16	Canada, China, EU, Japan, Malaysia, Mexico, New Zealand, Nordic Countries, OECD, Philippines, South Korea, Taiwan, Thailand, Turkey, United States, Vietnam	100000	1000	100000	1000	200000	0.5	0.5	0.5	0.5	0.5	0.5	1	0.5	0	1	0	1	0	0.5	1	3	1	high	1	USA - California Proposition 65		0	0	0	0
114	'25637-99-4	Cyclododecane, hexabromo-				C12 H18 Br6			22374-57-8	Colorant, Flame Retardant, Intermediates, Other Processing Aids	EPS, HIPS, Other - Rubber, Other - Thermoplastic, PA, PET, PP, PS, PUR	Automotive, Building & Construction, Electrical and Electronic Equipment, Household items, furniture and other, Packaging, Textiles, Toys	0	13	China, EU, Japan, Mexico, Nordic Countries, OECD, Philippines, Russia, South Korea, Taiwan, Turkey, United States, Vietnam	10000	0	100000	1000	110000	1	0	1	0	1	0	1	0	0	1	0	1	0		3	4	1	high	1	Stockholm Convention, Stockholm Convention (EU POP List), Rotterdam Convention, Rotterdam Convention (EU PIC List), EU REACH Authorisation, EU REACH SVHC, Japan CSCL Class I Restriction		0	0	0	0
115	'3194-55-6	Cyclododecane, 1,2,5,6,9,10-hexabromo-	DEIGXXQKDWULML-UHFFFAOYSA-N	InChI=1/C12H18Br6/c13-7-1-2-8(14)10(16)5-6-12(18)11(17)4-3-9(7)15/h7-12H,1-6H2	BrC1CCC(Br)C(Br)CCC(Br)C(Br)CCC1Br	C12 H18 Br6	635.651		23774-70-1	Flame Retardant	ABS, EPS, HDPE, HIPS, LDPE, Other - Rubber, Other - Thermoplastic, PA, PP, PS, PUR	Automotive, Building & Construction, Electrical and Electronic Equipment, Household items, furniture and other, Packaging, Textiles, Toys	0	14	Canada, China, EU, Japan, Nordic Countries, OECD, Philippines, Russia, South Korea, Taiwan, Thailand, Turkey, United States, Vietnam		100	100000	1000	100100	1	0	1	0	1	0	1	0	0	1	0	1	0		3	4	1	high	1	Stockholm Convention, Stockholm Convention (EU POP List), Rotterdam Convention, Rotterdam Convention (EU PIC List), EU REACH Authorisation, EU REACH SVHC, Japan CSCL Class I Restriction		0	0	0	0
118	'1313-27-5	Molybdenum oxide (MoO3)	JKQOBWVOAYFWKG-UHFFFAOYSA-N	InChI=1S/Mo.3O	O=[Mo](=O)=O	Mo O3	145.89		12412-21-4, 12412-22-5, 37376-47-9, 77835-70-2, 114316-51-7, 114663-84-2, 199790-61-9, 252368-25-5, 278186-89-3, 390388-97-3, 2196217-15-7, 2303937-75-7	Catalyst, Crosslinking Agent, Flame Retardant, Initiator, Lubricant, Other Processing Aids	LDPE, Other - Rubber, PET, PUR, PVC	Building & Construction	0	17	Canada, China, EU, Japan, Malaysia, Mexico, New Zealand, Nordic Countries, OECD, Philippines, Russia, South Korea, Taiwan, Thailand, Turkey, United States, Vietnam	100000	1000	1000000	1000	1100000		1					0.5	0.5	0.5	0	1	0.5	0		1	2.5	1	high	0			0	0	0	0
119	'115-96-8	Ethanol, 2-chloro-, 1,1',1''-phosphate	HQUQLFOMPYWACS-UHFFFAOYSA-N	InChI=1S/C6H12Cl3O4P/c7-1-4-11-14(10,12-5-2-8)13-6-3-9/h1-6H2	ClCCOP(=O)(OCCCl)OCCCl	C6 H12 Cl3 O4 P	283.954		21343-84-0	Flame Retardant, Intermediates, Odor Agent, Other Processing Aids, Plasticizer, Viscosity Modifier	HDPE, LDPE, Other - Bioplastic, Other - Rubber, Other - Thermoplastic, PA, PC, PET, PP, PS, PUR, PVC	Automotive, Building & Construction, Electrical and Electronic Equipment, Food-contact plastics, Household items, furniture and other, Packaging, Textiles, Toys	1	14	Canada, China, EU, Japan, Malaysia, Nordic Countries, OECD, Philippines, Russia, South Korea, Taiwan, Turkey, United States, Vietnam	10	100	1000	1000	1010		1					1	0.5	1	1	1	0.5	0		1	4	1	high	1	Rotterdam Convention (EU PIC List), EU REACH Authorisation, EU REACH SVHC, EU Toys directive, USA - California Proposition 65	EU Food Contact Materials Positive List	1	1	0	0
122	'13674-87-8	2-Propanol, 1,3-dichloro-, 2,2',2''-phosphate	ASLWPAWFJZFCKF-UHFFFAOYSA-N	InChI=1S/C9H15Cl6O4P/c10-1-7(2-11)17-20(16,18-8(3-12)4-13)19-9(5-14)6-15/h7-9H,1-6H2	ClCC(CCl)OP(=O)(OC(CCl)CCl)OC(CCl)CCl	C9 H15 Cl6 O4 P	427.884		1425202-15-8	Flame Retardant, Plasticizer	Other - Thermoplastic, PA, PET, PUR, PVC	Automotive, Building & Construction, Electrical and Electronic Equipment, Household items, furniture and other, Textiles	0	15	Canada, China, EU, Japan, Mexico, New Zealand, Nordic Countries, OECD, Philippines, Russia, South Korea, Taiwan, Turkey, United States, Vietnam	10000	1000	100000	1000	110000		1					0.5	0.5	0	0	1	0.5	0		1	2	1	high	1	EU Toys directive, USA - California Proposition 65		0	0	0	0
123	'13560-89-9	1,4:7,10-Dimethanodibenzo[a,e]cyclooctene, 1,2,3,4,7,8,9,10,13,13,14,14-dodecachloro-1,4,4a,5,6,6a,7,10,10a,11,12,12a-dodecahydro-	UGQQAJOWXNCOPY-UHFFFAOYSA-N	InChI=1/C18H12Cl12/c19-9-10(20)15(25)7-3-4-8-6(2-1-5(7)13(9,23)17(15,27)28)14(24)11(21)12(22)16(8,26)18(14,29)30/h5-8H,1-4H2	ClC1=C(Cl)C2(Cl)C3CCC4C(CCC3C1(Cl)C2(Cl)Cl)C1(Cl)C(Cl)=C(Cl)C4(Cl)C1(Cl)Cl	C18 H12 Cl12	647.72		11114-14-0, 39386-10-2, 40372-58-5, 59459-11-9, 60880-74-2, 1195618-74-6	Flame Retardant, Other Processing Aids	ABS, HDPE, HIPS, LDPE, Other - Rubber, Other - Thermoplastic, PA, PET, PP, PS, PUR	Automotive, Building & Construction, Electrical and Electronic Equipment, Textiles	0	12	Canada, China, EU, Japan, New Zealand, Nordic Countries, OECD, Philippines, South Korea, Taiwan, United States, Vietnam	1000	10	-1	1000	1000	1	1	1	1	1	1	0	0	0	0	0	0	0		2	2	1	high	1	EU REACH SVHC		0	0	0	0
128	'115-86-6	Phosphoric acid, triphenyl ester	XZZNDPSIHUTMOC-UHFFFAOYSA-N	InChI=1S/C18H15O4P/c19-23(20-16-10-4-1-5-11-16,21-17-12-6-2-7-13-17)22-18-14-8-3-9-15-18/h1-15H	O=P(OC1=CC=CC=C1)(OC1=CC=CC=C1)OC1=CC=CC=C1	C18 H15 O4 P	326.071		402955-02-6	Antioxidant, Colorant, Flame Retardant, Intermediates, Light Stabilizer, Lubricant, Other Processing Aids, Plasticizer	ABS, HDPE, HIPS, LDPE, Other - Bioplastic, Other - Rubber, Other - Thermoplastic, PC, PET, PP, PS, PUR, PVC	Automotive, Building & Construction, Electrical and Electronic Equipment, Food-contact plastics, Household items, furniture and other, Packaging, Textiles, Toys	1	16	Canada, China, EU, Japan, Malaysia, Mexico, Nordic Countries, OECD, Philippines, Russia, South Korea, Taiwan, Thailand, Turkey, United States, Vietnam	1000	100	100000	1000	101000		1					0	0	0	0	0	1	0	0.5	1	1.5	1	high	1	Korea REACH Authorisation	USA Food Contact Materials Positive List (GRAS), Japan Food Contact Materials Postiive List	1	0	1	1
135	'125997-21-9	Phosphoric trichloride, polymer with 1,3-benzenediol, phenyl ester				(C6 H6 O2 . Cl3 O P)x . x C6 H6 O				Flame Retardant, Plasticizer	ABS, HIPS, Other - Bioplastic, Other - Thermoplastic, PC, PS	Electrical and Electronic Equipment, Packaging	0	11	Canada, China, EU, New Zealand, Nordic Countries, OECD, South Korea, Taiwan, Thailand, United States, Vietnam		10	10000	1000	10010		1					0	0	0	0	0	1	0		1	1	1	high	0			0	0	0	0
137	'21645-51-2	Aluminum hydroxide (Al(OH)3)	WNROFYMDJYEPJX-UHFFFAOYSA-K	InChI=1S/Al.3H2O/h;3*1H2/q+3;;;/p-3	O[Al](O)O	Al H3 O3	77.9898	1333-84-2	1302-29-0, 8012-63-3, 8064-00-4, 12040-59-4, 12252-70-9, 13783-16-9, 16657-47-9, 51330-22-4, 106152-09-4, 128083-27-2, 151393-94-1, 156259-59-5, 159704-77-5, 227961-51-5, 507478-50-4, 546141-62-2, 546141-68-8, 1071843-34-9, 1847408-13-2, 2243017-67-4	Biocide, Catalyst, Colorant, Crosslinking Agent, Filler, Flame Retardant, Initiator, Intermediates, Lubricant, Odor Agent, Other Processing Aids	ABS, HDPE, LDPE, Other - Rubber, Other - Thermoplastic, PA, PC, PET, PP, PS, PUR, PVC	Automotive, Building & Construction, Electrical and Electronic Equipment, Food-contact plastics, Household items, furniture and other, Hygiene and Medical items, Packaging, Textiles, Toys	1	17	Canada, China, EU, Japan, Malaysia, Mexico, New Zealand, Nordic Countries, OECD, Philippines, Russia, South Korea, Taiwan, Thailand, Turkey, United States, Vietnam	10000000	1000000	10000000	1000	20000000		1					0	0	0	0	0	1	0		1	1	1	high	1	EU Toys directive	EU Food Contact Materials Positive List, USA Food Contact Materials Positive List (GRAS), Japan Food Contact Materials Postiive List	1	1	1	1
139	'1309-42-8	Magnesium hydroxide (Mg(OH)2)	VTHJTEIRLNZDEV-UHFFFAOYSA-L	InChI=1S/Mg.2H2O/h;2*1H2/q+2;;/p-2	[OH-].[OH-].[Mg++]	H2 Mg O2	57.9905		12195-86-7, 13760-51-5, 1395893-88-5	Antioxidant, Colorant, Filler, Flame Retardant, Intermediates, Light Stabilizer, Lubricant, Odor Agent, Other Processing Aids	ABS, HDPE, LDPE, Other - Rubber, Other - Thermoplastic, PA, PC, PET, PP, PS, PUR, PVC	Agriculture, Automotive, Building & Construction, Electrical and Electronic Equipment, Food-contact plastics, Packaging, Textiles	1	16	Canada, China, EU, Japan, Malaysia, Mexico, Nordic Countries, OECD, Philippines, Russia, South Korea, Taiwan, Thailand, Turkey, United States, Vietnam	1000000	100000	10000000	1000	11000000		1					0	0	0	0	1	0	0		1	1	1	high	0		EU Food Contact Materials Positive List, USA Food Contact Materials Positive List (GRAS), Japan Food Contact Materials Postiive List	1	1	1	1
140	'7723-14-0	Phosphorus	OAICVXFJPJFONN-UHFFFAOYSA-N	InChI=1S/P	[P]	P	30.9738		29879-37-6	Colorant, Filler, Flame Retardant, Intermediates, Other Processing Aids	ABS, HDPE, LDPE, Other - Thermoplastic, PA, PC, PET, PP, PS, PUR, PVC		0	15	Canada, China, EU, Malaysia, Mexico, Nordic Countries, OECD, Philippines, Russia, South Korea, Taiwan, Thailand, Turkey, United States, Vietnam	10000	100	1000000	1000	1010000		1					0	0	0	0	0.5	1	0		1	1.5	1	high	0		Japan Food Contact Materials Postiive List	1	0	0	1
141	'1332-07-6	Boric acid, zinc salt	BIKXLKXABVUSMH-UHFFFAOYSA-N	InChI=1S/2BO3.3Zn/c2*2-1(3)4;;;/q2*-3;3*+2	[Zn++].[Zn++].[Zn++].[O-]B([O-])[O-].[O-]B([O-])[O-]	Unspecified	309.776		37221-82-2, 59330-52-8	Biocide, Colorant, Filler, Flame Retardant, Lubricant, Other Processing Aids	ABS, HDPE, LDPE, Other - Bioplastic, Other - Rubber, Other - Thermoplastic, PA, PC, PET, PP, PS, PUR, PVC	Building & Construction, Textiles	0	14	Canada, China, EU, Japan, Malaysia, Mexico, New Zealand, Nordic Countries, Philippines, South Korea, Taiwan, Turkey, United States, Vietnam	100	100	100000		100100		1					1	0	0	1	0	1	0		1	2	1	high	1	EU Toys directive, Korea REACH Authorisation		0	0	0	0
147	'26444-49-5	Phosphoric acid, methylphenyl diphenyl ester			C*.O=P(OC1=CC=CC=C1)(OC1=CC=CC=C1)OC1=CC=CC=C1 |c:6,8,14,16,22,24,t:4,12,20,lp:2:2,4:2,11:2,18:2,m:1:6.7.8|	C19 H17 O4 P			1323-17-7, 627081-24-7	Flame Retardant, Lubricant, Other Processing Aids, Plasticizer	HIPS, Other - Bioplastic, PC, PS, PUR, PVC	Building & Construction, Electrical and Electronic Equipment, Food-contact plastics, Household items, furniture and other, Packaging, Textiles	1	16	Canada, China, EU, Japan, Malaysia, Mexico, New Zealand, Nordic Countries, OECD, Philippines, Russia, South Korea, Taiwan, Thailand, United States, Vietnam		100	1000	1000	1100		1					0.5	0	0	0.5	0.5	1	0		1	2	1	high	0		USA Food Contact Materials Positive List (GRAS), Japan Food Contact Materials Postiive List	1	0	1	1
151	'1309-64-4	Antimony oxide (Sb2O3)	ADCOVFLJGNWWNZ-UHFFFAOYSA-N	InChI=1S/3O.2Sb	O=[Sb]O[Sb]=O	O3 Sb2	289.792		10042-99-6, 12423-58-4, 97048-22-1, 97048-23-2, 154396-41-5, 178989-93-0, 212793-41-4, 2144402-92-4, 2379521-11-4	Antioxidant, Catalyst, Colorant, Crosslinking Agent, Filler, Flame Retardant, Initiator, Intermediates, Light Stabilizer, Lubricant, Other Processing Aids	ABS, HDPE, HIPS, LDPE, Other - Bioplastic, Other - Rubber, Other - Thermoplastic, PA, PC, PET, PP, PS, PUR, PVC	Automotive, Building & Construction, Electrical and Electronic Equipment, Food-contact plastics, Household items, furniture and other, Packaging, Textiles, Toys	1	16	Canada, China, EU, Japan, Malaysia, Mexico, Nordic Countries, OECD, Philippines, Russia, South Korea, Taiwan, Thailand, Turkey, United States, Vietnam	10000	1000	10000	1000	20000		1					1	1	0	1	1	0.5	0		1	3.5	1	high	1	EU Toys directive, USA - California Proposition 65	EU Food Contact Materials Positive List, Japan Food Contact Materials Postiive List	1	1	0	1
152	'25155-23-1	Phenol, dimethyl-, 1,1',1''-phosphate			C*.C*.C*.C*.C*.C*.O=P(OC1=CC=CC=C1)(OC1=CC=CC=C1)OC1=CC=CC=C1 |c:11,13,19,21,27,29,t:9,17,25,lp:12:2,14:2,21:2,28:2,m:1:33.34,3:30.31.32.33,5:16.17,7:17.18.19.20,9:23.24,11:24.25.26.27|	C24 H27 O4 P			95660-61-0, 174956-83-3	Flame Retardant, Lubricant, Plasticizer	PS, PUR, PVC	Automotive, Textiles	0	15	Canada, China, EU, Japan, Malaysia, New Zealand, Nordic Countries, OECD, Philippines, Russia, South Korea, Taiwan, Thailand, United States, Vietnam	1000	10	-1	1000	1000	0.5	0.5	0.5	0.5	0.5	0.5	1	0	0	1	0.5	1	0		1	2.5	1	high	1	EU REACH Authorisation, EU REACH SVHC		0	0	0	0
154	'79-06-1	2-Propenamide	HRPVXLWXLXDGHG-UHFFFAOYSA-N	InChI=1S/C3H5NO/c1-2-3(4)5/h2H,1H2,(H2,4,5)	NC(=O)C=C	C3 H5 N O	71.0371		1198293-68-3	Colorant, Crosslinking Agent, Filler, Intermediates, Monomer, Other Processing Aids	ABS, Other - Rubber, Other - Thermoplastic	Automotive, Building & Construction, Electrical and Electronic Equipment, Food-contact plastics, Household items, furniture and other, Packaging, Textiles, Toys	1	17	Canada, China, EU, India, Japan, Malaysia, Mexico, Nordic Countries, OECD, Philippines, Russia, South Korea, Taiwan, Thailand, Turkey, United States, Vietnam	1000000	1000	1000000	1000	2000000		1					1	1	1	1	1	0.5	0		1	4.5	1	high	1	EU REACH Restriction, EU REACH SVHC, USA - California Proposition 65, Korea REACH Authorisation	EU Food Contact Materials Positive List, USA Food Contact Materials Positive List (GRAS), Japan Food Contact Materials Postiive List	1	1	1	1
155	'140-66-9	Phenol, 4-(1,1,3,3-tetramethylbutyl)-	ISAVYTVYFVQUDY-UHFFFAOYSA-N	InChI=1S/C14H22O/c1-13(2,3)10-14(4,5)11-6-8-12(15)9-7-11/h6-9,15H,10H2,1-5H3	CC(C)(C)CC(C)(C)C1=CC=C(O)C=C1	C14 H22 O	206.167		37769-53-2, 85771-77-3, 124765-79-3	Antioxidant, Colorant, Crosslinking Agent, Intermediates, Light Stabilizer, Lubricant, Monomer, Other Processing Aids, Plasticizer	Other - Rubber, PVC	Building & Construction, Electrical and Electronic Equipment, Food-contact plastics, Household items, furniture and other, Packaging, Textiles, Toys	1	15	Canada, China, EU, Japan, Malaysia, Mexico, Nordic Countries, OECD, Philippines, Russia, South Korea, Taiwan, Turkey, United States, Vietnam	100000	10	100000	1000	200000	0.5	0.5	0.5	0.5	0.5	0.5	0.5	0	0	0.5	0.5	1	0	1	1	3	1	high	1	EU REACH SVHC, Korea REACH Authorisation	USA Food Contact Materials Positive List (GRAS), Japan Food Contact Materials Postiive List	1	0	1	1
156	'80-05-7	Phenol, 4,4'-(1-methylethylidene)bis-	IISBACLAFKSPIT-UHFFFAOYSA-N	InChI=1S/C15H16O2/c1-15(2,11-3-7-13(16)8-4-11)12-5-9-14(17)10-6-12/h3-10,16-17H,1-2H3	CC(C)(C1=CC=C(O)C=C1)C1=CC=C(O)C=C1	C15 H16 O2	228.115		27360-89-0, 28106-82-3, 37808-08-5, 137885-53-1, 146479-75-6, 1429425-26-2	Antioxidant, Antistatic Agent, Blowing Agent, Catalyst, Colorant, Crosslinking Agent, Filler, Flame Retardant, Intermediates, Light Stabilizer, Lubricant, Monomer, Other Processing Aids, Plasticizer	ABS, LDPE, Other - Thermoplastic, PA, PC, PUR, PVC	Agriculture, Automotive, Building & Construction, Electrical and Electronic Equipment, Food-contact plastics, Household items, furniture and other, Packaging, Textiles, Toys	1	16	Canada, China, EU, India, Japan, Malaysia, Mexico, Nordic Countries, OECD, Philippines, South Korea, Taiwan, Thailand, Turkey, United States, Vietnam	1000000	1000	10000000	1000	11000000		1					1	1	1	1	0.5	0.5	0	1	1	5	1	high	1	EU REACH Restriction, EU REACH SVHC, EU Toys directive, USA - California Proposition 65	EU Food Contact Materials Positive List, USA Food Contact Materials Positive List (GRAS), Japan Food Contact Materials Postiive List	1	1	1	1
157	'50-00-0	Formaldehyde	WSFSSNUMVMOOMR-UHFFFAOYSA-N	InChI=1S/CH2O/c1-2/h1H2	C=O	C H2 O	30.0106		8005-38-7, 8006-07-3, 8013-13-6, 112068-71-0, 1053659-79-2, 1156543-56-4, 1158237-02-5, 1227476-28-9, 1357848-44-2, 1416946-65-0, 1609158-91-9, 2100305-91-5	Antioxidant, Antistatic Agent, Biocide, Blowing Agent, Colorant, Crosslinking Agent, Filler, Intermediates, Light Stabilizer, Lubricant, Monomer, Odor Agent, Other Processing Aids	ABS, Other - Thermoplastic, PA, PET	Agriculture, Automotive, Building & Construction, Electrical and Electronic Equipment, Food-contact plastics, Household items, furniture and other, Hygiene and Medical items, Packaging, Textiles, Toys	1	17	Canada, China, EU, India, Japan, Malaysia, Mexico, New Zealand, Nordic Countries, OECD, Philippines, South Korea, Taiwan, Thailand, Turkey, United States, Vietnam	1000000	100000	10000000	1000	11000000		1					1	1	0.5	0	1	1	1		1	3.5	1	high	1	USA - California Proposition 65, Korea REACH Restriction, Korea REACH Authorisation	EU Food Contact Materials Positive List, USA Food Contact Materials Positive List (GRAS), Japan Food Contact Materials Postiive List	1	1	1	1
159	'108-95-2	Phenol	ISWSIDIOOBJBQZ-UHFFFAOYSA-N	InChI=1S/C6H6O/c7-6-4-2-1-3-5-6/h1-5,7H	OC1=CC=CC=C1	C6 H6 O	94.0419		8002-07-1, 14534-23-7, 50356-25-7	Antioxidant, Biocide, Catalyst, Colorant, Crosslinking Agent, Filler, Flame Retardant, Intermediates, Light Stabilizer, Lubricant, Monomer, Odor Agent, Other Processing Aids, Plasticizer	ABS, HDPE, LDPE, Other - Rubber, Other - Thermoplastic, PA, PC, PVC	Agriculture, Automotive, Building & Construction, Electrical and Electronic Equipment, Food-contact plastics, Household items, furniture and other, Hygiene and Medical items, Packaging, Textiles, Toys	1	18	Canada, China, EU, India, Japan, Malaysia, Mexico, New Zealand, Nordic Countries, OECD, Philippines, Russia, South Korea, Taiwan, Thailand, Turkey, United States, Vietnam	10000000	100000	10000000	1000	20000000		1					1	0.5	1	1	1	1	0		1	4.5	1	high	1	Korea REACH Authorisation	EU Food Contact Materials Positive List, USA Food Contact Materials Positive List (GRAS), Japan Food Contact Materials Postiive List	1	1	1	1
167	'302-01-2	Hydrazine	OAKJQQAXSVQMHS-UHFFFAOYSA-N	InChI=1S/H4N2/c1-2/h1-2H2	NN	H4 N2	32.0374		31886-26-7, 75013-58-0, 78206-91-4, 119775-10-9	Antioxidant, Blowing Agent, Colorant, Crosslinking Agent, Flame Retardant, Initiator, Intermediates, Lubricant, Monomer, Other Processing Aids, Plasticizer	Other - Rubber, PUR	Automotive	0	15	Canada, China, EU, Japan, Mexico, Nordic Countries, OECD, Philippines, Russia, South Korea, Taiwan, Thailand, Turkey, United States, Vietnam	10000	100	100000	1000	110000		1					1	1	0.5	0.5	1	1	0		1	4	1	high	1	USA - California Proposition 65, Korea REACH Authorisation	USA Food Contact Materials Positive List (GRAS)	1	0	1	0
168	'7803-57-8	Hydrazine, hydrate (1:1)	IKDUDTNKRLTJSI-UHFFFAOYSA-N	InChI=1S/H4N2.H2O/c1-2;/h1-2H2;1H2	O.NN	H4 N2 . H2 O	50.048	10217-52-4	65209-65-6, 65492-74-2, 79785-97-0, 2089212-75-7	Antioxidant, Blowing Agent, Crosslinking Agent, Flame Retardant, Initiator, Intermediates	PUR		0	11	China, EU, India, New Zealand, Nordic Countries, OECD, Philippines, South Korea, Taiwan, Thailand, Vietnam		100		1000	1000		1					1	1	1	0.5	1	1	0		1	4.5	1	high	1	Korea REACH Authorisation	Japan Food Contact Materials Postiive List	1	0	0	1
169	'101-77-9	Benzenamine, 4,4'-methylenebis-	YBRVSVVVWCFQMG-UHFFFAOYSA-N	InChI=1S/C13H14N2/c14-12-5-1-10(2-6-12)9-11-3-7-13(15)8-4-11/h1-8H,9,14-15H2	NC1=CC=C(CC2=CC=C(N)C=C2)C=C1	C13 H14 N2	198.116		28602-61-1, 83712-44-1, 120859-32-7, 136601-30-4, 148263-71-2	Antioxidant, Catalyst, Colorant, Crosslinking Agent, Initiator, Intermediates, Lubricant, Monomer, Other Processing Aids	HDPE, LDPE, Other - Thermoplastic, PA, PP, PUR	Automotive, Building & Construction, Electrical and Electronic Equipment, Food-contact plastics, Household items, furniture and other, Packaging, Textiles	1	16	Canada, China, EU, Japan, Malaysia, Mexico, Nordic Countries, OECD, Philippines, Russia, South Korea, Taiwan, Thailand, Turkey, United States, Vietnam	100000	10	1000000	1000	1100000		1					1	1	1	0.5	1	1	0		1	4.5	1	high	1	EU REACH Authorisation, EU REACH SVHC, USA - California Proposition 65, Korea REACH Authorisation	USA Food Contact Materials Positive List (GRAS), Japan Food Contact Materials Postiive List	1	0	1	1
170	'101-14-4	Benzenamine, 4,4'-methylenebis[2-chloro-	IBOFVQJTBBUKMU-UHFFFAOYSA-N	InChI=1S/C13H12Cl2N2/c14-10-6-8(1-3-12(10)16)5-9-2-4-13(17)11(15)7-9/h1-4,6-7H,5,16-17H2	NC1=C(Cl)C=C(CC2=CC(Cl)=C(N)C=C2)C=C1	C13 H12 Cl2 N2	266.038		29371-14-0, 51065-07-7, 78642-65-6, 126699-69-2, 142661-36-7, 913092-91-8, 1899048-27-1, 1951406-44-2	Catalyst, Colorant, Crosslinking Agent, Initiator, Intermediates, Other Processing Aids, Plasticizer	Other - Rubber, Other - Thermoplastic, PS, PUR	Automotive, Building & Construction, Electrical and Electronic Equipment, Food-contact plastics, Packaging, Textiles	1	15	Canada, China, EU, India, Japan, Malaysia, Mexico, Nordic Countries, OECD, Philippines, South Korea, Taiwan, Thailand, United States, Vietnam	10000	100	10000	1000	20000		1					1	1	0.5	0	0.5	1	0		1	3	1	high	1	EU REACH Authorisation, EU REACH SVHC, USA - California Proposition 65, Korea REACH Restriction, Korea REACH Authorisation	USA Food Contact Materials Positive List (GRAS)	1	0	1	0
171	'98-54-4	Phenol, 4-(1,1-dimethylethyl)-	QHPQWRBYOIRBIT-UHFFFAOYSA-N	InChI=1S/C10H14O/c1-10(2,3)8-4-6-9(11)7-5-8/h4-7,11H,1-3H3	CC(C)(C)C1=CC=C(O)C=C1	C10 H14 O	150.104		1334243-56-9	Antioxidant, Catalyst, Colorant, Crosslinking Agent, Filler, Flame Retardant, Initiator, Intermediates, Light Stabilizer, Monomer, Other Processing Aids, Plasticizer	Other - Rubber, PC	Agriculture, Automotive, Building & Construction, Electrical and Electronic Equipment, Food-contact plastics, Household items, furniture and other, Packaging, Textiles	1	15	Canada, China, EU, Japan, Mexico, Nordic Countries, OECD, Philippines, Russia, South Korea, Taiwan, Thailand, Turkey, United States, Vietnam	100000	100	100000	1000	200000		1					0.5	0	0	0.5	1	0.5	1	1	1	3	1	high	1	EU REACH SVHC, EU Toys directive	EU Food Contact Materials Positive List, USA Food Contact Materials Positive List (GRAS), Japan Food Contact Materials Postiive List	1	1	1	1
172	'128-39-2	Phenol, 2,6-bis(1,1-dimethylethyl)-	DKCPKDPYUFEZCP-UHFFFAOYSA-N	InChI=1S/C14H22O/c1-13(2,3)10-8-7-9-11(12(10)15)14(4,5)6/h7-9,15H,1-6H3	CC(C)(C)C1=CC=CC(=C1O)C(C)(C)C	C14 H22 O	206.167		50356-17-7	Antioxidant, Intermediates, Light Stabilizer, Lubricant	HDPE, LDPE, PC, PET	Agriculture, Automotive, Building & Construction, Textiles	0	16	Canada, China, EU, Japan, Malaysia, Mexico, Nordic Countries, OECD, Philippines, Russia, South Korea, Taiwan, Thailand, Turkey, United States, Vietnam	10000	100	1000000	1000	1010000	0	0	0	0	0	0	0	0	0	0	0.5	1	0		1	1.5	1	high	0			0	0	0	0
173	'26447-40-5	Benzene, 1,1'-methylenebis[isocyanato-				C15 H10 N2 O2			12125-47-2, 28515-38-0, 65916-89-4, 156580-59-5, 327155-87-3	Blowing Agent, Colorant, Crosslinking Agent, Filler, Intermediates, Other Processing Aids	PUR	Automotive, Building & Construction, Electrical and Electronic Equipment, Food-contact plastics, Household items, furniture and other, Packaging, Textiles	1	15	Canada, China, EU, Japan, Malaysia, Mexico, Nordic Countries, OECD, Philippines, Russia, South Korea, Taiwan, Turkey, United States, Vietnam		10000	1000000	1000	1010000		1					0.5	0.5	0	0	1	0	1		1	1.5	1	high	1	EU REACH Restriction	USA Food Contact Materials Positive List (GRAS)	1	0	1	0
174	'5873-54-1	Benzene, 1-isocyanato-2-[(4-isocyanatophenyl)methyl]-	LFSYUSUFCBOHGU-UHFFFAOYSA-N	InChI=1S/C15H10N2O2/c18-10-16-14-7-5-12(6-8-14)9-13-3-1-2-4-15(13)17-11-19/h1-8H,9H2	O=C=NC1=CC=C(CC2=CC=CC=C2N=C=O)C=C1	C15 H10 N2 O2	250.074		1400594-69-5	Colorant, Crosslinking Agent, Filler, Intermediates, Monomer, Other Processing Aids	PUR	Agriculture, Automotive, Building & Construction, Electrical and Electronic Equipment, Food-contact plastics, Household items, furniture and other, Packaging, Textiles	1	14	Canada, China, EU, Japan, New Zealand, Nordic Countries, OECD, Philippines, Russia, South Korea, Taiwan, Turkey, United States, Vietnam	100000	1000	100000	1000	200000	0	0	0	0	0	0	0.5	0.5	0	0	1	0	1		1	1.5	1	high	1	EU REACH Restriction	EU Food Contact Materials Positive List, Japan Food Contact Materials Postiive List	1	1	0	1
175	'101-68-8	Benzene, 1,1'-methylenebis[4-isocyanato-	UPMLOUAZCHDJJD-UHFFFAOYSA-N	InChI=1S/C15H10N2O2/c18-10-16-14-5-1-12(2-6-14)9-13-3-7-15(8-4-13)17-11-19/h1-8H,9H2	O=C=NC1=CC=C(CC2=CC=C(C=C2)N=C=O)C=C1	C15 H10 N2 O2	250.074	10031-75-1	53633-14-0, 55157-41-0, 57460-66-9, 77090-48-3, 88001-94-9, 97568-33-7, 142690-07-1, 153986-89-1, 201528-77-0, 1211266-59-9, 1211316-64-1, 1220313-65-4, 1400594-70-8, 1533423-48-1, 1588489-56-8, 2031250-39-0, 2056146-02-0	Blowing Agent, Catalyst, Colorant, Crosslinking Agent, Filler, Intermediates, Monomer, Other Processing Aids	Other - Rubber, PUR	Agriculture, Automotive, Building & Construction, Electrical and Electronic Equipment, Food-contact plastics, Household items, furniture and other, Hygiene and Medical items, Packaging, Textiles, Toys	1	18	Canada, China, EU, India, Japan, Malaysia, Mexico, Nordic Countries, OECD, Philippines, Russia, South Korea, Switzerland, Taiwan, Thailand, Turkey, United States, Vietnam	1000000	10000	1000000	1000	2000000	0	0	0	0	0	0	0.5	0.5	0.5	0	1	0	1		1	2	1	high	1	EU REACH Restriction, Korea REACH Authorisation	EU Food Contact Materials Positive List, USA Food Contact Materials Positive List (GRAS), Japan Food Contact Materials Postiive List	1	1	1	1
176	'26471-62-5	Benzene, 1,3-diisocyanatomethyl-	RTTZISZSHSCFRH-UHFFFAOYSA-N			C9 H6 N2 O2		1321-38-6, 26102-02-3	1321-39-7, 25321-34-0, 29033-29-2, 50853-47-9, 50985-24-5, 71215-63-9, 72214-34-7, 80498-23-3, 89698-92-0, 104213-33-4, 110681-06-6, 136154-22-8, 1186289-23-5, 1204229-13-9, 1204746-08-6, 1211316-67-4, 1326716-94-2, 1421949-89-4, 1422250-41-6, 1422343-79-0, 1432062-26-4	Colorant, Crosslinking Agent, Filler, Intermediates, Monomer, Other Processing Aids	PUR	Automotive, Building & Construction, Electrical and Electronic Equipment, Food-contact plastics, Household items, furniture and other, Hygiene and Medical items, Packaging, Textiles	1	15	Canada, China, EU, Japan, Malaysia, Mexico, Nordic Countries, OECD, Philippines, South Korea, Taiwan, Thailand, Turkey, United States, Vietnam	10000000	10000	1000000	1000	11000000		1					0.5	0.5	0	0	1	1	1		1	2.5	1	high	1	USA - California Proposition 65, Korea REACH Authorisation	USA Food Contact Materials Positive List (GRAS), Japan Food Contact Materials Postiive List	1	0	1	1
177	'584-84-9	Benzene, 2,4-diisocyanato-1-methyl-	DVKJHBMWWAPEIU-UHFFFAOYSA-N	InChI=1S/C9H6N2O2/c1-7-2-3-8(10-5-12)4-9(7)11-6-13/h2-4H,1H3	CC1=CC=C(C=C1N=C=O)N=C=O	C9 H6 N2 O2	174.043		86-91-9, 59539-76-3, 856307-56-7, 1260158-01-7, 1358624-38-0	Blowing Agent, Catalyst, Colorant, Crosslinking Agent, Filler, Intermediates, Monomer, Other Processing Aids	PUR	Automotive, Building & Construction, Electrical and Electronic Equipment, Food-contact plastics, Household items, furniture and other, Packaging, Textiles	1	17	Canada, China, EU, Japan, Malaysia, Mexico, New Zealand, Nordic Countries, OECD, Philippines, Russia, South Korea, Taiwan, Thailand, Turkey, United States, Vietnam	1000000	10000	1000000	1000	2000000		1					0.5	0.5	0	0	1	0.5	1		1	2	1	high	1	Korea REACH Authorisation	EU Food Contact Materials Positive List, USA Food Contact Materials Positive List (GRAS), Japan Food Contact Materials Postiive List	1	1	1	1
178	'91-08-7	Benzene, 1,3-diisocyanato-2-methyl-	RUELTTOHQODFPA-UHFFFAOYSA-N	InChI=1S/C9H6N2O2/c1-7-8(10-5-12)3-2-4-9(7)11-6-13/h2-4H,1H3	CC1=C(C=CC=C1N=C=O)N=C=O	C9 H6 N2 O2	174.043		137091-34-0	Blowing Agent, Crosslinking Agent, Filler, Intermediates, Monomer, Other Processing Aids	PUR	Automotive, Building & Construction, Food-contact plastics, Household items, furniture and other, Packaging, Textiles	1	14	Canada, China, EU, India, Japan, Mexico, New Zealand, OECD, Philippines, South Korea, Taiwan, Turkey, United States, Vietnam	10	1000	-1	1000	1000		1					0.5	0.5	0.5	0	1	0	1		1	2	1	high	1	Korea REACH Authorisation	EU Food Contact Materials Positive List, USA Food Contact Materials Positive List (GRAS), Japan Food Contact Materials Postiive List	1	1	1	1
179	'100-42-5	Benzene, ethenyl-	PPBRXRYQALVLMV-UHFFFAOYSA-N	InChI=1S/C8H8/c1-2-8-6-4-3-5-7-8/h2-7H,1H2	C=CC1=CC=CC=C1	C8 H8	104.063		79637-11-9, 1161074-30-1, 1198090-46-8, 1453489-93-4, 1646200-96-5, 2015955-51-6, 2351150-23-5	Catalyst, Colorant, Crosslinking Agent, Filler, Initiator, Intermediates, Lubricant, Monomer, Odor Agent, Other Processing Aids, Plasticizer	ABS, EPS, HDPE, HIPS, LDPE, Other - Bioplastic, Other - Rubber, Other - Thermoplastic, PS	Agriculture, Automotive, Building & Construction, Electrical and Electronic Equipment, Food-contact plastics, Household items, furniture and other, Hygiene and Medical items, Packaging, Textiles, Toys	1	17	Canada, China, EU, India, Japan, Malaysia, Mexico, Nordic Countries, OECD, Philippines, Russia, South Korea, Taiwan, Thailand, Turkey, United States, Vietnam	10000000	1000000	10000000	1000	20000000		1					1	0.5	0.5	1	1	1	0		1	4	1	high	1	USA - California Proposition 65	EU Food Contact Materials Positive List, Japan Food Contact Materials Postiive List	1	1	0	1
180	'75-35-4	Ethene, 1,1-dichloro-	LGXVIGDEPROXKC-UHFFFAOYSA-N	InChI=1S/C2H2Cl2/c1-2(3)4/h1H2	ClC(Cl)=C	C2 H2 Cl2	95.9534			Filler, Flame Retardant, Intermediates, Monomer, Odor Agent, Other Processing Aids	ABS, Other - Thermoplastic, PVC	Automotive, Building & Construction, Electrical and Electronic Equipment, Food-contact plastics, Packaging, Textiles	1	12	Canada, China, EU, Japan, Mexico, Nordic Countries, OECD, Philippines, South Korea, Taiwan, United States, Vietnam	100000	1000	-1	1000	100000		1					1	1	0	0.5	1	0.5	0		1	3	1	high	1	Rotterdam Convention (EU PIC List), EU REACH Restriction, USA - California Proposition 65	EU Food Contact Materials Positive List, USA Food Contact Materials Positive List (GRAS), Japan Food Contact Materials Postiive List	1	1	1	1
181	'106-46-7	Benzene, 1,4-dichloro-	OCJBOOLMMGQPQU-UHFFFAOYSA-N	InChI=1S/C6H4Cl2/c7-5-1-2-6(8)4-3-5/h1-4H	ClC1=CC=C(Cl)C=C1	C6 H4 Cl2	145.969			Biocide, Colorant, Filler, Intermediates, Light Stabilizer, Monomer, Odor Agent, Other Processing Aids, Plasticizer	Other - Bioplastic, Other - Thermoplastic, PET	Food-contact plastics, Packaging, Textiles	1	14	Canada, China, EU, Japan, Mexico, Nordic Countries, OECD, Philippines, South Korea, Taiwan, Thailand, Turkey, United States, Vietnam	100000	100	100000	1000	200000		1					1	0.5	0.5	1	1	1	0		1	4	1	high	1	EU REACH Restriction, USA - California Proposition 65, Korea REACH Authorisation	EU Food Contact Materials Positive List, USA Food Contact Materials Positive List (GRAS), Japan Food Contact Materials Postiive List	1	1	1	1
182	'107-13-1	2-Propenenitrile	NLHHRLWOUZZQLW-UHFFFAOYSA-N	InChI=1S/C3H3N/c1-2-3-4/h2H,1H2	C=CC#N	C3 H3 N	53.0265		29754-21-0, 63908-52-1, 769126-92-3, 769134-66-9, 1006710-56-0, 1197872-06-2, 1221168-60-0, 1309882-90-3, 1538611-90-3, 2015239-29-7	Antioxidant, Colorant, Crosslinking Agent, Filler, Intermediates, Lubricant, Monomer, Other Processing Aids	ABS, Other - Rubber, Other - Thermoplastic, PA	Automotive, Building & Construction, Electrical and Electronic Equipment, Food-contact plastics, Household items, furniture and other, Hygiene and Medical items, Packaging, Textiles	1	16	Canada, China, EU, Japan, Malaysia, Mexico, Nordic Countries, OECD, Philippines, Russia, South Korea, Taiwan, Thailand, Turkey, United States, Vietnam	10000000	10000	10000000	1000	20000000		1					1	1	0.5	1	1	0.5	0		1	4	1	high	1	USA - California Proposition 65, Korea REACH Authorisation	EU Food Contact Materials Positive List, USA Food Contact Materials Positive List (GRAS), Japan Food Contact Materials Postiive List	1	1	1	1
183	'106-99-0	1,3-Butadiene	KAKZBPTYRLMSJV-UHFFFAOYSA-N	InChI=1S/C4H6/c1-3-4-2/h3-4H,1-2H2	C=CC=C	C4 H6	54.047	25339-57-5	130983-70-9, 183592-61-2, 1213224-27-1	Crosslinking Agent, Filler, Intermediates, Lubricant, Monomer, Other Processing Aids, Plasticizer	ABS, HIPS, Other - Rubber, Other - Thermoplastic, PA, PS	Agriculture, Automotive, Building & Construction, Electrical and Electronic Equipment, Food-contact plastics, Household items, furniture and other, Hygiene and Medical items, Packaging, Textiles	1	15	Canada, China, EU, Japan, Malaysia, Mexico, Nordic Countries, OECD, Philippines, South Korea, Taiwan, Thailand, Turkey, United States, Vietnam	10000000	10000	10000000	1000	20000000	0.5	0.5	0.5	0.5	0.5	0.5	1	1	1	1	1	0	0		1	4	1	high	1	USA - California Proposition 65, Korea REACH Authorisation	EU Food Contact Materials Positive List, USA Food Contact Materials Positive List (GRAS), Japan Food Contact Materials Postiive List	1	1	1	1
184	'106-92-3	Oxirane, 2-[(2-propen-1-yloxy)methyl]-	LSWYGACWGAICNM-UHFFFAOYSA-N	InChI=1/C6H10O2/c1-2-3-7-4-6-5-8-6/h2,6H,1,3-5H2	C=CCOCC1CO1	C6 H10 O2	114.068		90907-93-0, 112186-06-8	Intermediates, Lubricant, Other Processing Aids		Electrical and Electronic Equipment, Food-contact plastics, Packaging	1	14	Canada, China, EU, Japan, Mexico, Nordic Countries, OECD, Philippines, Russia, South Korea, Taiwan, Thailand, United States, Vietnam	1000	1000	10000	1000	11000		1					0.5	0.5	0.5	0.5	1	0.5	0		1	3	1	high	0		USA Food Contact Materials Positive List (GRAS), Japan Food Contact Materials Postiive List	1	0	1	1
185	'2426-08-6	Oxirane, 2-(butoxymethyl)-	YSUQLAYJZDEMOT-UHFFFAOYSA-N	InChI=1/C7H14O2/c1-2-3-4-8-5-7-6-9-7/h7H,2-6H2,1H3	CCCCOCC1CO1	C7 H14 O2	130.099		85858-60-2, 144376-83-0, 921213-37-8	Filler, Intermediates, Other Processing Aids			0	15	Canada, China, EU, Japan, Mexico, New Zealand, Nordic Countries, OECD, Philippines, Russia, South Korea, Taiwan, Thailand, United States, Vietnam	1000	10	10000	1000	11000		1					1	1	0.5	0.5	1	0.5	1		1	3.5	1	high	0		Japan Food Contact Materials Postiive List	1	0	0	1
188	'2243-62-1	1,5-Naphthalenediamine	KQSABULTKYLFEV-UHFFFAOYSA-N	InChI=1S/C10H10N2/c11-9-5-1-3-7-8(9)4-2-6-10(7)12/h1-6H,11-12H2	NC1=CC=CC2=C(N)C=CC=C12	C10 H10 N2	158.084			Intermediates	PUR		0	7	China, EU, Japan, Nordic Countries, OECD, Taiwan, Vietnam		0		1000	1000		1					0.5	0.5	0	0	0	1	0		1	1.5	1	high	0			0	0	0	0
190	'75-56-9	Oxirane, 2-methyl-	GOOHAUXETOMSMM-UHFFFAOYSA-N	InChI=1/C3H6O/c1-3-2-4-3/h3H,2H2,1H3	CC1CO1	C3 H6 O	58.0419		16033-71-9	Biocide, Colorant, Filler, Flame Retardant, Intermediates, Light Stabilizer, Lubricant, Monomer, Odor Agent, Other Processing Aids	PUR	Automotive, Building & Construction, Electrical and Electronic Equipment, Food-contact plastics, Household items, furniture and other, Packaging, Textiles	1	15	Canada, China, EU, Japan, Malaysia, Mexico, Nordic Countries, OECD, Philippines, South Korea, Taiwan, Thailand, Turkey, United States, Vietnam	10000000	10000	10000000	1000	20000000		1					1	1	1	0.5	0	0.5	0		1	3	1	high	1	EU REACH SVHC, USA - California Proposition 65, Korea REACH Authorisation	EU Food Contact Materials Positive List, USA Food Contact Materials Positive List (GRAS), Japan Food Contact Materials Postiive List	1	1	1	1
191	'2451-62-9	1,3,5-Triazine-2,4,6(1H,3H,5H)-trione, 1,3,5-tris(2-oxiranylmethyl)-	OUPZKGBUJRBPGC-UHFFFAOYSA-N	InChI=1/C12H15N3O6/c16-10-13(1-7-4-19-7)11(17)15(3-9-6-21-9)12(18)14(10)2-8-5-20-8/h7-9H,1-6H2	O=C1N(CC2CO2)C(=O)N(CC2CO2)C(=O)N1CC1CO1	C12 H15 N3 O6	297.096		414867-60-0	Colorant, Crosslinking Agent, Light Stabilizer, Monomer, Other Processing Aids	LDPE, Other - Rubber, PET	Building & Construction, Electrical and Electronic Equipment	0	15	Canada, China, EU, Japan, Malaysia, Mexico, Nordic Countries, OECD, Philippines, South Korea, Taiwan, Thailand, Turkey, United States, Vietnam	1000	100	10000	1000	11000	0	0	0	0	0	0	1	0	1	0.5	1	0	1		1	2.5	1	high	1	EU REACH SVHC, Korea REACH Authorisation	USA Food Contact Materials Positive List (GRAS), Japan Food Contact Materials Postiive List	1	0	1	1
193	'288-32-4	1H-Imidazole	RAXXELZNTBOGNW-UHFFFAOYSA-N	InChI=1S/C3H4N2/c1-2-5-3-4-1/h1-3H,(H,4,5)	N1C=CN=C1	C3 H4 N2	68.0374		116421-26-2, 146117-15-9	Intermediates, Other Processing Aids	PUR	Building & Construction, Electrical and Electronic Equipment, Textiles	0	16	Canada, China, EU, Japan, Mexico, New Zealand, Nordic Countries, OECD, Philippines, Russia, South Korea, Taiwan, Thailand, Turkey, United States, Vietnam	10	10	-1	1000	1000		1					1	0	0	1	0	0	0		1	1	1	high	0			0	0	0	0
195	'108-05-4	Acetic acid ethenyl ester	XTXRWKRVRITETP-UHFFFAOYSA-N	InChI=1S/C4H6O2/c1-3-6-4(2)5/h3H,1H2,2H3	CC(=O)OC=C	C4 H6 O2	86.0368		58162-13-3, 61891-42-7, 82041-23-4, 85306-26-9, 172702-77-1, 220713-36-0	Colorant, Crosslinking Agent, Filler, Impact Modifier, Intermediates, Lubricant, Monomer, Nucleating Agent, Other Processing Aids	ABS, HDPE, LDPE, Other - Thermoplastic, PVC	Agriculture, Automotive, Building & Construction, Electrical and Electronic Equipment, Food-contact plastics, Household items, furniture and other, Packaging, Textiles, Toys	1	15	Canada, China, EU, Malaysia, Mexico, Nordic Countries, OECD, Philippines, Russia, South Korea, Taiwan, Thailand, Turkey, United States, Vietnam	10000000	100000	10000000	1000	20000000		1					1	1	0.5	0	0.5	0.5	0		1	2.5	1	high	0		EU Food Contact Materials Positive List, USA Food Contact Materials Positive List (GRAS), Japan Food Contact Materials Postiive List	1	1	1	1
205	'25973-55-1	Phenol, 2-(2H-benzotriazol-2-yl)-4,6-bis(1,1-dimethylpropyl)-	ZMWRRFHBXARRRT-UHFFFAOYSA-N	InChI=1S/C22H29N3O/c1-7-21(3,4)15-13-16(22(5,6)8-2)20(26)19(14-15)25-23-17-11-9-10-12-18(17)24-25/h9-14,26H,7-8H2,1-6H3	CCC(C)(C)C1=CC(N2N=C3C=CC=CC3=N2)=C(O)C(=C1)C(C)(C)CC	C22 H29 N3 O	351.231		3142-41-4, 42558-99-6, 51829-45-9, 70419-42-0, 98354-04-2, 102257-30-7, 104817-16-5, 131242-53-0, 134018-57-8, 153613-73-1, 186805-09-4, 188025-36-7, 189377-89-7, 796971-88-5, 850346-35-9, 855281-45-7, 909728-30-9, 1244977-94-3, 1391942-68-9, 1449275-36-8, 1492588-58-5, 2098648-58-7	Antioxidant, Biocide, Colorant, Filler, Intermediates, Light Stabilizer, Lubricant, Other Processing Aids	ABS, HDPE, HIPS, LDPE, Other - Rubber, Other - Thermoplastic, PA, PC, PET, PP, PS, PUR, PVC	Automotive, Building & Construction, Electrical and Electronic Equipment, Food-contact plastics, Household items, furniture and other, Packaging, Textiles	1	15	Canada, China, EU, Japan, Mexico, New Zealand, Nordic Countries, OECD, Philippines, South Korea, Taiwan, Thailand, Turkey, United States, Vietnam	1000	10	10000	1000	11000	1	1	1	1	1	1	0	0	0	0	1	0	1		3	3	1	high	1	EU REACH Authorisation, EU REACH SVHC	USA Food Contact Materials Positive List (GRAS), Japan Food Contact Materials Postiive List	1	0	1	1
208	'149-57-5	Hexanoic acid, 2-ethyl-	OBETXYAYXDNJHR-UHFFFAOYSA-N	InChI=1/C8H16O2/c1-3-5-6-7(4-2)8(9)10/h7H,3-6H2,1-2H3,(H,9,10)	CCCCC(CC)C(O)=O	C8 H16 O2	144.115		83829-68-9, 202054-39-5	Catalyst, Colorant, Filler, Heat Stabilizer, Intermediates, Light Stabilizer, Lubricant, Other Processing Aids, Solvent	Other - Thermoplastic, PUR, PVC	Agriculture, Automotive, Building & Construction, Electrical and Electronic Equipment, Food-contact plastics, Household items, furniture and other, Packaging, Textiles, Toys	1	15	Canada, China, EU, Malaysia, Mexico, Nordic Countries, OECD, Philippines, Russia, South Korea, Taiwan, Thailand, Turkey, United States, Vietnam	100000	1000	100000	1000	200000		1					1	0	0	1	0	0.5	0		1	1.5	1	high	0		Japan Food Contact Materials Postiive List	1	0	0	1
209	'683-18-1	Stannane, dibutyldichloro-	RJGHQTVXGKYATR-UHFFFAOYSA-L	InChI=1S/2C4H9.2ClH.Sn/c2*1-3-4-2;;;/h2*1,3-4H2,2H3;2*1H;/q;;;;+2/p-2	CCCC[Sn](Cl)(Cl)CCCC	C8 H18 Cl2 Sn	303.981			Antioxidant, Catalyst, Crosslinking Agent, Filler, Initiator, Intermediates, Light Stabilizer, Other Processing Aids	PUR, PVC	Automotive, Building & Construction, Food-contact plastics, Packaging	1	15	Canada, China, EU, Japan, Mexico, New Zealand, Nordic Countries, OECD, Philippines, Russia, South Korea, Taiwan, Thailand, United States, Vietnam	100	0	100000	1000	100100		1					1	0	0.5	1	1	1	0		1	3.5	1	high	1	Rotterdam Convention (EU PIC List), EU REACH SVHC, EU Toys directive	USA Food Contact Materials Positive List (GRAS)	1	0	1	0
210	'57583-35-4	8-Oxa-3,5-dithia-4-stannatetradecanoic acid, 10-ethyl-4,4-dimethyl-7-oxo-, 2-ethylhexyl ester	YAHBZWSDRFSFOO-UHFFFAOYSA-L	InChI=1/2C10H20O2S.2CH3.Sn/c2*1-3-5-6-9(4-2)7-12-10(11)8-13;;;/h2*9,13H,3-8H2,1-2H3;2*1H3;/q;;;;+2/p-2	CCCCC(CC)COC(=O)CS[Sn](C)(C)SCC(=O)OCC(CC)CCCC	C22 H44 O4 S2 Sn	556.17			Catalyst, Heat Stabilizer, Light Stabilizer, Other Processing Aids	PVC	Agriculture, Building & Construction, Electrical and Electronic Equipment, Food-contact plastics, Hygiene and Medical items, Packaging	1	13	Canada, China, EU, Japan, Nordic Countries, OECD, Philippines, South Korea, Taiwan, Thailand, Turkey, United States, Vietnam	10000	100	100000	1000	110000		1					0.5	0	0.5	0.5	1	0	0		1	2	1	high	1	EU Toys directive	EU Food Contact Materials Positive List, USA Food Contact Materials Positive List (GRAS), Japan Food Contact Materials Postiive List	1	1	1	1
211	'15571-58-1	8-Oxa-3,5-dithia-4-stannatetradecanoic acid, 10-ethyl-4,4-dioctyl-7-oxo-, 2-ethylhexyl ester	VXGIVDFKZKMKQO-UHFFFAOYSA-L	InChI=1/2C10H20O2S.2C8H17.Sn/c2*1-3-5-6-9(4-2)7-12-10(11)8-13;2*1-3-5-7-8-6-4-2;/h2*9,13H,3-8H2,1-2H3;2*1,3-8H2,2H3;/q;;;;+2/p-2	CCCCCCCC[Sn](CCCCCCCC)(SCC(=O)OCC(CC)CCCC)SCC(=O)OCC(CC)CCCC	C36 H72 O4 S2 Sn	752.389		52433-96-2, 64685-79-6, 71061-19-3, 85873-44-5	Catalyst, Colorant, Heat Stabilizer, Light Stabilizer, Other Processing Aids	PVC	Automotive, Food-contact plastics, Packaging	1	13	Canada, China, EU, Japan, New Zealand, Nordic Countries, OECD, Philippines, South Korea, Taiwan, Turkey, United States, Vietnam	10000	10	-1	1000	10000		1					1	0	0	1	1	1	0		1	3	1	high	1	Rotterdam Convention (EU PIC List), EU REACH SVHC, EU Toys directive	EU Food Contact Materials Positive List, Japan Food Contact Materials Postiive List	1	1	0	1
212	'77-58-7	Dodecanoic acid, 1,1'-(dibutylstannylene) ester	UKLDJPRMSDWDSL-UHFFFAOYSA-L	InChI=1S/2C12H24O2.2C4H9.Sn/c2*1-2-3-4-5-6-7-8-9-10-11-12(13)14;2*1-3-4-2;/h2*2-11H2,1H3,(H,13,14);2*1,3-4H2,2H3;/q;;;;+2/p-2	CCCCCCCCCCCC(=O)O[Sn](CCCC)(CCCC)OC(=O)CCCCCCCCCCC	C32 H64 O4 Sn	632.383		358-50-9, 7428-79-7, 8028-83-9, 70620-28-9, 125199-87-3, 185915-28-0, 211990-09-9, 1204812-53-2, 1702279-08-0, 1702279-15-9, 2056906-49-9	Antioxidant, Catalyst, Colorant, Crosslinking Agent, Filler, Heat Stabilizer, Initiator, Intermediates, Light Stabilizer, Lubricant, Other Processing Aids	HDPE, LDPE, PA, PET, PP, PUR, PVC	Agriculture, Automotive, Building & Construction, Electrical and Electronic Equipment, Food-contact plastics, Household items, furniture and other, Hygiene and Medical items, Packaging, Textiles	1	15	Canada, China, EU, Japan, Malaysia, Mexico, Nordic Countries, OECD, Philippines, South Korea, Taiwan, Thailand, Turkey, United States, Vietnam	1000	10	10000	1000	11000		1					1	0	0.5	1	1	1	1		1	3.5	1	high	1	Rotterdam Convention (EU PIC List), EU Toys directive	USA Food Contact Materials Positive List (GRAS)	1	0	1	0
213	'753-73-1	Stannane, dichlorodimethyl-	PKKGKUDPKRTKLJ-UHFFFAOYSA-L	InChI=1S/2CH3.2ClH.Sn/h2*1H3;2*1H;/q;;;;+2/p-2	C[Sn](C)(Cl)Cl	C2 H6 Cl2 Sn	219.887			Catalyst, Heat Stabilizer, Light Stabilizer, Other Processing Aids	PUR, PVC		0	13	Canada, China, EU, Japan, New Zealand, Nordic Countries, OECD, Philippines, South Korea, Taiwan, Thailand, United States, Vietnam	10	0	-1	1000	1000		1					0.5	0	0	0.5	1	1	0		1	2.5	1	high	1	EU Toys directive		0	0	0	0
214	'26523-78-4	Phenol, nonyl-, 1,1',1''-phosphite				C45 H69 O3 P			1331-68-6, 88985-15-3, 125935-91-3, 221006-80-0	Antioxidant, Colorant, Filler, Heat Stabilizer, Light Stabilizer, Lubricant, Other Processing Aids	ABS, HDPE, LDPE, Other - Rubber, Other - Thermoplastic, PC, PP, PS, PVC	Automotive, Building & Construction, Electrical and Electronic Equipment, Food-contact plastics, Household items, furniture and other, Packaging, Textiles, Toys	1	15	Canada, China, EU, Japan, Malaysia, Nordic Countries, OECD, Philippines, Russia, South Korea, Taiwan, Thailand, Turkey, United States, Vietnam		100	100000	1000	100100		1					1	0	0	1	0	1	0	1	1	3	1	high	1	EU REACH SVHC	USA Food Contact Materials Positive List (GRAS), Japan Food Contact Materials Postiive List	1	0	1	1
215	'68515-42-4	1,2-Benzenedicarboxylic acid, di-C7-11-branched and linear alkyl esters				Unspecified				Other Processing Aids, Plasticizer	PVC	Automotive, Building & Construction, Electrical and Electronic Equipment, Packaging, Textiles	0	12	Canada, China, EU, Japan, New Zealand, Nordic Countries, OECD, Philippines, South Korea, Taiwan, United States, Vietnam		1000		1000	1000		1					1	0	0	1	0	0	0		1	1	1	high	1	EU REACH Authorisation, EU REACH SVHC		0	0	0	0
216	'71888-89-6	1,2-Benzenedicarboxylic acid, di-C6-8-branched alkyl esters, C7-rich				Unspecified				Plasticizer	Other - Thermoplastic, PUR, PVC	Automotive, Building & Construction, Electrical and Electronic Equipment, Packaging, Textiles	0	12	Canada, China, EU, New Zealand, Nordic Countries, OECD, Philippines, Russia, South Korea, Taiwan, United States, Vietnam		1000		1000	1000		1					1	0	0	1	0	0	0		1	1	1	high	1	EU REACH Authorisation, EU REACH SVHC		0	0	0	0
217	'85535-84-8	Alkanes, C10-13, chloro				Unspecified				Colorant, Filler, Flame Retardant, Lubricant, Other Processing Aids, Plasticizer	Other - Rubber, PUR, PVC	Automotive, Building & Construction, Electrical and Electronic Equipment, Household items, furniture and other, Packaging, Textiles, Toys	0	12	Canada, China, EU, Japan, Mexico, Nordic Countries, OECD, Philippines, Russia, South Korea, Taiwan, Vietnam	10	10		1000	1000	1	1	1	1	1	1	0.5	0.5	0	0	0	1	0		3	3.5	1	high	1	Stockholm Convention, Stockholm Convention (EU POP List), Rotterdam Convention, Rotterdam Convention (EU PIC List), EU REACH SVHC, Japan CSCL Class I Restriction		0	0	0	0
219	'85535-85-9	Chloroalkanes, C14-17				Unspecified				Blowing Agent, Colorant, Filler, Flame Retardant, Lubricant, Other Processing Aids, Plasticizer	LDPE, Other - Rubber, PUR, PVC	Agriculture, Automotive, Building & Construction, Electrical and Electronic Equipment, Household items, furniture and other, Textiles	0	16	Canada, China, EU, Japan, Malaysia, Mexico, New Zealand, Nordic Countries, OECD, Philippines, South Korea, Taiwan, Thailand, Turkey, United States, Vietnam	100000	1000		1000	100000	1	1	1	1	1	1	1	0	0	1	0	1	0		3	4	1	high	0			0	0	0	0
221	'85-68-7	1,2-Benzenedicarboxylic acid, 1-butyl 2-(phenylmethyl) ester	IRIAEXORFWYRCZ-UHFFFAOYSA-N	InChI=1S/C19H20O4/c1-2-3-13-22-18(20)16-11-7-8-12-17(16)19(21)23-14-15-9-5-4-6-10-15/h4-12H,2-3,13-14H2,1H3	CCCCOC(=O)C1=C(C=CC=C1)C(=O)OCC1=CC=CC=C1	C19 H20 O4	312.136		58128-78-2	Colorant, Crosslinking Agent, Filler, Lubricant, Other Processing Aids, Plasticizer	HDPE, LDPE, Other - Bioplastic, Other - Rubber, Other - Thermoplastic, PA, PET, PUR, PVC	Automotive, Building & Construction, Electrical and Electronic Equipment, Food-contact plastics, Household items, furniture and other, Hygiene and Medical items, Packaging, Textiles, Toys	1	15	Canada, China, EU, Japan, Malaysia, Mexico, Nordic Countries, OECD, Philippines, South Korea, Taiwan, Thailand, Turkey, United States, Vietnam	10	1000	100000	1000	100010		1					1	0	0.5	1	0.5	1	0	1	1	4	1	high	1	Rotterdam Convention (EU PIC List), EU REACH Restriction, EU REACH Authorisation, EU REACH SVHC, EU RoHS directive, USA - California Proposition 65, Korea REACH Authorisation	EU Food Contact Materials Positive List, USA Food Contact Materials Positive List (GRAS), Japan Food Contact Materials Postiive List	1	1	1	1
222	'117-81-7	1,2-Benzenedicarboxylic acid, 1,2-bis(2-ethylhexyl) ester	BJQHLKABXJIVAM-UHFFFAOYSA-N	InChI=1/C24H38O4/c1-5-9-13-19(7-3)17-27-23(25)21-15-11-12-16-22(21)24(26)28-18-20(8-4)14-10-6-2/h11-12,15-16,19-20H,5-10,13-14,17-18H2,1-4H3	CCCCC(CC)COC(=O)C1=C(C=CC=C1)C(=O)OCC(CC)CCCC	C24 H38 O4	390.277		8033-53-2, 40120-69-2, 50885-87-5, 109630-52-6, 126639-29-0, 137718-37-7, 205180-59-2, 275818-89-8, 607374-50-5	Colorant, Crosslinking Agent, Filler, Intermediates, Light Stabilizer, Odor Agent, Other Processing Aids, Plasticizer	ABS, HDPE, LDPE, Other - Bioplastic, Other - Rubber, Other - Thermoplastic, PA, PET, PS, PUR, PVC	Agriculture, Automotive, Building & Construction, Electrical and Electronic Equipment, Food-contact plastics, Household items, furniture and other, Hygiene and Medical items, Packaging, Textiles, Toys	1	15	Canada, China, EU, Japan, Malaysia, Mexico, Nordic Countries, OECD, Philippines, South Korea, Taiwan, Thailand, Turkey, United States, Vietnam	100000	10000	1000000	1000	1100000		1					1	1	0	1	0.5	1	0	1	1	4.5	1	high	1	EU REACH Restriction, EU REACH Authorisation, EU REACH SVHC, EU RoHS directive, USA - California Proposition 65, Korea REACH Authorisation	EU Food Contact Materials Positive List, USA Food Contact Materials Positive List (GRAS), Japan Food Contact Materials Postiive List	1	1	1	1
224	'84-74-2	1,2-Benzenedicarboxylic acid, 1,2-dibutyl ester	DOIRQSBPFJWKBE-UHFFFAOYSA-N	InChI=1S/C16H22O4/c1-3-5-11-19-15(17)13-9-7-8-10-14(13)16(18)20-12-6-4-2/h7-10H,3-6,11-12H2,1-2H3	CCCCOC(=O)C1=CC=CC=C1C(=O)OCCCC	C16 H22 O4	278.152			Catalyst, Colorant, Crosslinking Agent, Filler, Intermediates, Lubricant, Odor Agent, Other Processing Aids, Plasticizer	ABS, HDPE, LDPE, Other - Bioplastic, Other - Rubber, Other - Thermoplastic, PA, PET, PP, PS, PUR, PVC	Agriculture, Automotive, Building & Construction, Electrical and Electronic Equipment, Food-contact plastics, Household items, furniture and other, Hygiene and Medical items, Packaging, Textiles, Toys	1	15	Canada, China, EU, Japan, Malaysia, Mexico, Nordic Countries, OECD, Philippines, South Korea, Taiwan, Thailand, Turkey, United States, Vietnam	10000	1000	10000	1000	20000	0.5	0.5	0.5	0.5	0.5	0.5	1	1	0	1	1	1	0	1	1	5	1	high	1	EU REACH Restriction, EU REACH Authorisation, EU REACH SVHC, EU RoHS directive, USA - California Proposition 65, Korea REACH Authorisation	EU Food Contact Materials Positive List, USA Food Contact Materials Positive List (GRAS), Japan Food Contact Materials Postiive List	1	1	1	1
225	'84-69-5	1,2-Benzenedicarboxylic acid, 1,2-bis(2-methylpropyl) ester	MGWAVDBGNNKXQV-UHFFFAOYSA-N	InChI=1S/C16H22O4/c1-11(2)9-19-15(17)13-7-5-6-8-14(13)16(18)20-10-12(3)4/h5-8,11-12H,9-10H2,1-4H3	CC(C)COC(=O)C1=C(C=CC=C1)C(=O)OCC(C)C	C16 H22 O4	278.152			Catalyst, Colorant, Crosslinking Agent, Filler, Intermediates, Other Processing Aids, Plasticizer, Solvent	HDPE, LDPE, Other - Bioplastic, Other - Thermoplastic, PET, PS, PVC	Agriculture, Automotive, Building & Construction, Electrical and Electronic Equipment, Food-contact plastics, Household items, furniture and other, Packaging, Textiles, Toys	1	14	Canada, China, EU, Japan, Mexico, Nordic Countries, OECD, Philippines, South Korea, Taiwan, Thailand, Turkey, United States, Vietnam	10	100	-1	1000	1000	0.5	0.5	0.5	0.5	0.5	0.5	1	0	0	1	0	1	0	1	1	3	1	high	1	Rotterdam Convention (EU PIC List), EU REACH Restriction, EU REACH Authorisation, EU REACH SVHC, EU RoHS directive	USA Food Contact Materials Positive List (GRAS), Japan Food Contact Materials Postiive List	1	0	1	1
229	'84-75-3	1,2-Benzenedicarboxylic acid, 1,2-dihexyl ester	KCXZNSGUUQJJTR-UHFFFAOYSA-N	InChI=1S/C20H30O4/c1-3-5-7-11-15-23-19(21)17-13-9-10-14-18(17)20(22)24-16-12-8-6-4-2/h9-10,13-14H,3-8,11-12,15-16H2,1-2H3	CCCCCCOC(=O)C1=C(C=CC=C1)C(=O)OCCCCCC	C20 H30 O4	334.214			Plasticizer	Other - Bioplastic, Other - Thermoplastic, PUR, PVC	Automotive, Building & Construction, Food-contact plastics, Household items, furniture and other, Packaging, Textiles, Toys	1	10	Canada, China, EU, Japan, New Zealand, Nordic Countries, South Korea, Taiwan, United States, Vietnam		10	1000		1010		1					1	0	0	1	0	0	0		1	1	1	high	1	EU REACH Authorisation, EU REACH SVHC, USA - California Proposition 65	USA Food Contact Materials Positive List (GRAS), Japan Food Contact Materials Postiive List	1	0	1	1
232	'77-90-7	1,2,3-Propanetricarboxylic acid, 2-(acetyloxy)-, 1,2,3-tributyl ester	QZCLKYGREBVARF-UHFFFAOYSA-N	InChI=1S/C20H34O8/c1-5-8-11-25-17(22)14-20(28-16(4)21,19(24)27-13-10-7-3)15-18(23)26-12-9-6-2/h5-15H2,1-4H3	CCCCOC(=O)CC(CC(=O)OCCCC)(OC(C)=O)C(=O)OCCCC	C20 H34 O8	402.225		37070-91-0, 791812-73-2	Biocide, Colorant, Filler, Intermediates, Lubricant, Odor Agent, Other Processing Aids, Plasticizer	HDPE, LDPE, Other - Bioplastic, Other - Thermoplastic, PC, PP, PS, PUR, PVC	Automotive, Building & Construction, Electrical and Electronic Equipment, Food-contact plastics, Household items, furniture and other, Hygiene and Medical items, Packaging, Textiles, Toys	1	15	Canada, China, EU, Japan, Mexico, Nordic Countries, OECD, Philippines, Russia, South Korea, Taiwan, Thailand, Turkey, United States, Vietnam	100000	10	10000	1000	110000		1					1	1	1	0	0	0	0	0	1	2	1	high	0		EU Food Contact Materials Positive List, USA Food Contact Materials Positive List (GRAS), Japan Food Contact Materials Postiive List	1	1	1	1
242	'109-86-4	Ethanol, 2-methoxy-	XNWFRZJHXBZDAG-UHFFFAOYSA-N	InChI=1S/C3H8O2/c1-5-3-2-4/h4H,2-3H2,1H3	COCCO	C3 H8 O2	76.0524			Colorant, Intermediates, Lubricant, Other Processing Aids, Solvent		Automotive, Building & Construction, Electrical and Electronic Equipment, Food-contact plastics, Household items, furniture and other, Packaging, Textiles, Toys	1	14	Canada, China, EU, Mexico, Nordic Countries, OECD, Philippines, Russia, South Korea, Taiwan, Thailand, Turkey, United States, Vietnam	10000	100	10000	1000	20000		1					1	0	0	1	1	0	0		1	2	1	high	1	EU REACH SVHC, USA - California Proposition 65, Korea REACH Authorisation	USA Food Contact Materials Positive List (GRAS)	1	0	1	0
243	'79-01-6	Ethene, 1,1,2-trichloro-	XSTXAVWGXDQKEL-UHFFFAOYSA-N	InChI=1S/C2HCl3/c3-1-2(4)5/h1H	ClC=C(Cl)Cl	C2 H Cl3	129.914		52037-46-4	Catalyst, Colorant, Intermediates, Light Stabilizer, Lubricant, Odor Agent, Other Processing Aids, Solvent	ABS, Other - Bioplastic, Other - Thermoplastic, PVC	Agriculture, Automotive, Building & Construction, Electrical and Electronic Equipment, Food-contact plastics, Household items, furniture and other, Packaging, Textiles, Toys	1	15	Canada, China, EU, Japan, Malaysia, Mexico, Nordic Countries, OECD, Philippines, South Korea, Taiwan, Thailand, Turkey, United States, Vietnam	100000	100	1000000	1000	1100000		1					1	1	0.5	1	1	0.5	0		1	4	1	high	1	EU REACH Authorisation, EU REACH SVHC, USA - California Proposition 65, Japan CSCL Class II Authorisation, Korea REACH Restriction, Korea REACH Authorisation	USA Food Contact Materials Positive List (GRAS)	1	0	1	0
245	'68-12-2	Formamide, N,N-dimethyl-	ZMXDDKWLCZADIW-UHFFFAOYSA-N	InChI=1S/C3H7NO/c1-4(2)3-5/h3H,1-2H3	CN(C)C=O	C3 H7 N O	73.0528		15175-63-0, 15175-77-6, 33513-42-7, 114057-15-7	Catalyst, Colorant, Crosslinking Agent, Filler, Intermediates, Odor Agent, Other Processing Aids, Solvent	Other - Thermoplastic, PA, PET, PUR, PVC	Agriculture, Automotive, Building & Construction, Electrical and Electronic Equipment, Food-contact plastics, Household items, furniture and other, Packaging, Textiles, Toys	1	15	Canada, China, EU, India, Malaysia, Mexico, Nordic Countries, OECD, Philippines, South Korea, Taiwan, Thailand, Turkey, United States, Vietnam	100000	1000	100000	1000	200000		1					1	1	0.5	1	1	0	0		1	3.5	1	high	1	EU REACH SVHC, USA - California Proposition 65, Korea REACH Authorisation	USA Food Contact Materials Positive List (GRAS)	1	0	1	0
246	'96-18-4	Propane, 1,2,3-trichloro-	CFXQEHVMCRXUSD-UHFFFAOYSA-N	InChI=1S/C3H5Cl3/c4-1-3(6)2-5/h3H,1-2H2	ClCC(Cl)CCl	C3 H5 Cl3	145.946			Colorant, Crosslinking Agent, Intermediates, Monomer, Other Processing Aids, Solvent	Other - Rubber	Agriculture, Automotive, Building & Construction, Packaging	0	14	Canada, China, EU, Japan, Mexico, Nordic Countries, OECD, Philippines, Russia, South Korea, Taiwan, Thailand, United States, Vietnam	10000	0	-1	1000	10000		1					1	1	0.5	1	1	1	0		1	4.5	1	high	1	EU REACH SVHC, USA - California Proposition 65	USA Food Contact Materials Positive List (GRAS)	1	0	1	0
247	'16096-31-4	Oxirane, 2,2'-[1,6-hexanediylbis(oxymethylene)]bis-	WTYYGFLRBWMFRY-UHFFFAOYSA-N	InChI=1/C12H22O4/c1(3-5-13-7-11-9-15-11)2-4-6-14-8-12-10-16-12/h11-12H,1-10H2	C(CCCOCC1CO1)CCOCC1CO1	C12 H22 O4	230.152			Antistatic Agent, Colorant, Crosslinking Agent, Filler, Light Stabilizer, Other Processing Aids		Agriculture, Building & Construction, Electrical and Electronic Equipment, Household items, furniture and other, Textiles	0	14	Canada, China, EU, Japan, Malaysia, New Zealand, Nordic Countries, OECD, Philippines, South Korea, Taiwan, Turkey, United States, Vietnam		100	10000	1000	10100		1					0	0	0	0	0	1	0		1	1	1	high	0		Japan Food Contact Materials Postiive List	1	0	0	1
248	'75-09-2	Methane, dichloro-	YMWUJEATGCHHMB-UHFFFAOYSA-N	InChI=1S/CH2Cl2/c2-1-3/h1H2	ClCCl	C H2 Cl2	83.9534			Biocide, Blowing Agent, Colorant, Filler, Intermediates, Lubricant, Odor Agent, Other Processing Aids	ABS, PC, PUR	Automotive, Building & Construction, Electrical and Electronic Equipment, Food-contact plastics, Household items, furniture and other, Packaging, Textiles, Toys	1	16	Canada, China, EU, India, Japan, Malaysia, Mexico, Nordic Countries, OECD, Philippines, South Korea, Taiwan, Thailand, Turkey, United States, Vietnam	1000000	1000	1000000	1000	2000000		1					1	1	1	1	1	0.5	1	0.5	1	5	1	high	1	EU REACH Restriction, USA - California Proposition 65	USA Food Contact Materials Positive List (GRAS)	1	0	1	0
249	'79-00-5	Ethane, 1,1,2-trichloro-	UBOXGVDOUJQMTN-UHFFFAOYSA-N	InChI=1S/C2H3Cl3/c3-1-2(4)5/h2H,1H2	ClCC(Cl)Cl	C2 H3 Cl3	131.93			Intermediates	Other - Thermoplastic	Automotive, Food-contact plastics, Packaging	1	13	Canada, China, EU, Japan, Mexico, Nordic Countries, OECD, Philippines, Russia, South Korea, Taiwan, United States, Vietnam		1	1000000	1000	1000001		1					1	1	0	0	1	0.5	0		1	2.5	1	high	1	Monteal Protocol, Rotterdam Convention (EU PIC List), EU REACH Restriction, USA - California Proposition 65	USA Food Contact Materials Positive List (GRAS)	1	0	1	0
250	'123-91-1	1,4-Dioxane	RYHBNJHYFVUHQT-UHFFFAOYSA-N	InChI=1S/C4H8O2/c1-2-6-4-3-5-1/h1-4H2	C1COCCO1	C4 H8 O2	88.0524		28347-88-8, 28347-91-3, 39449-24-6, 54841-74-6	Colorant, Filler, Intermediates, Odor Agent, Other Processing Aids	Other - Bioplastic	Automotive, Building & Construction, Electrical and Electronic Equipment, Food-contact plastics, Household items, furniture and other, Packaging, Textiles, Toys	1	15	Canada, China, EU, Japan, Malaysia, Mexico, Nordic Countries, OECD, Philippines, Russia, South Korea, Taiwan, Thailand, United States, Vietnam	1000	10	10000	1000	11000		1					1	1	0	0	1	0	0		1	2	1	high	1	USA - California Proposition 65	USA Food Contact Materials Positive List (GRAS)	1	0	1	0
254	'9016-45-9	Poly(oxy-1,2-ethanediyl), ╬▒-(nonylphenyl)-¤ë-hydroxy-			[H]OCCO*.CCCCCCCCC1=CC=CC=C1 |c:15,17,t:13,lp:1:2,4:2,m:5:18.19.17,Sg:n:1,2,3::ht|	(C2 H4 O)n C15 H24 O			9021-03-8, 9067-50-9, 11098-16-1, 11103-60-9, 11107-93-0, 12767-68-9, 12789-12-7, 12790-67-9, 25640-88-4, 27288-14-8, 28136-10-9, 29594-36-3, 30676-83-6, 32196-52-4, 37187-23-8, 37210-94-9, 37230-99-2, 37280-80-1, 37291-67-1, 37336-52-0, 39289-57-1, 39316-45-5, 39316-73-9, 39346-85-5, 39373-71-2, 39392-83-1, 39393-36-7, 39421-49-3, 39453-05-9, 39454-98-3, 39475-46-2, 42617-03-8, 50855-29-3, 50934…	Antioxidant, Catalyst, Colorant, Crosslinking Agent, Filler, Intermediates, Light Stabilizer, Lubricant, Monomer, Other Processing Aids	PUR, PVC	Agriculture, Automotive, Building & Construction, Electrical and Electronic Equipment, Food-contact plastics, Household items, furniture and other, Packaging, Textiles, Toys	1	16	Canada, China, EU, Japan, Malaysia, Mexico, Nordic Countries, OECD, Philippines, Russia, South Korea, Switzerland, Taiwan, Turkey, United States, Vietnam	10	1000	10000	1000	10010	1	0	1	0	1	0	0.5	0	0	0.5	0.5	1	0	1	3	5	1	high	1	Rotterdam Convention (EU PIC List), EU REACH Authorisation, EU REACH SVHC, Korea REACH Restriction	USA Food Contact Materials Positive List (GRAS)	1	0	1	0
259	'25154-52-3	Phenol, nonyl-	SNQQPOLDUKLAAF-UHFFFAOYSA-N			C15 H24 O			1300-16-9, 256459-00-4	Antioxidant, Antistatic Agent, Catalyst, Colorant, Crosslinking Agent, Filler, Intermediates, Light Stabilizer, Lubricant, Monomer, Other Processing Aids	Other - Rubber, PA, PUR, PVC	Automotive, Building & Construction, Electrical and Electronic Equipment, Food-contact plastics, Household items, furniture and other, Packaging, Textiles, Toys	1	15	Canada, China, EU, Japan, Mexico, Nordic Countries, OECD, Philippines, Russia, South Korea, Taiwan, Thailand, Turkey, United States, Vietnam		100	-1	1000	1000		1					1	0	0	1	0.5	1	0	1	1	3.5	1	high	1	Rotterdam Convention (EU PIC List), EU REACH Restriction, EU REACH SVHC, Korea REACH Restriction, Korea REACH Authorisation	USA Food Contact Materials Positive List (GRAS), Japan Food Contact Materials Postiive List	1	0	1	1
266	'28987-17-9	Phenol, nonyl-, barium salt (2:1)				C15 H24 O . 1/2 Ba			26763-02-0	Antioxidant, Catalyst, Heat Stabilizer, Intermediates, Light Stabilizer, Monomer, Other Processing Aids, Plasticizer	PUR, PVC	Automotive, Building & Construction, Food-contact plastics, Household items, furniture and other, Packaging, Textiles	1	15	Canada, China, EU, Japan, New Zealand, Nordic Countries, OECD, Philippines, Russia, South Korea, Taiwan, Thailand, Turkey, United States, Vietnam		0	10000	1000	10000		1					0	0	0	0	0	1	0		1	1	1	high	1	EU Toys directive		0	0	0	0
271	'68412-54-4	Poly(oxy-1,2-ethanediyl), ╬▒-(nonylphenyl)-¤ë-hydroxy-, branched				Unspecified				Antioxidant, Blowing Agent, Catalyst, Colorant, Filler, Light Stabilizer, Lubricant, Monomer, Other Processing Aids, Viscosity Modifier	PUR, PVC	Agriculture, Automotive, Building & Construction, Electrical and Electronic Equipment, Food-contact plastics, Household items, furniture and other, Packaging, Textiles	1	15	Canada, China, EU, Japan, Malaysia, Mexico, Nordic Countries, Philippines, Russia, South Korea, Switzerland, Taiwan, Turkey, United States, Vietnam	1000	100	100		1100		1					0	0	0	0	0	1	0	1	1	2	1	high	1	Rotterdam Convention (EU PIC List), EU REACH Authorisation, EU REACH SVHC		0	0	0	0
275	'84852-15-3	Phenol, 4-nonyl-, branched				Unspecified				Antioxidant, Catalyst, Colorant, Crosslinking Agent, Heat Stabilizer, Intermediates, Light Stabilizer, Lubricant, Monomer, Other Processing Aids, Plasticizer	PUR, PVC	Automotive, Building & Construction, Electrical and Electronic Equipment, Food-contact plastics, Household items, furniture and other, Packaging, Textiles	1	15	Canada, China, EU, Japan, Malaysia, Mexico, Nordic Countries, OECD, Philippines, Russia, South Korea, Taiwan, Turkey, United States, Vietnam	100000	10	1000000	1000	1100000	0.5	0.5	0.5	0.5	0.5	0.5	0.5	0	0	0.5	0.5	1	0	1	1	3	1	high	1	Rotterdam Convention (EU PIC List), EU REACH SVHC, Korea REACH Restriction, Korea REACH Authorisation		0	0	0	0
276	'127087-87-0	Poly(oxy-1,2-ethanediyl), ╬▒-(4-nonylphenyl)-¤ë-hydroxy-, branched				Unspecified				Antioxidant, Catalyst, Light Stabilizer, Lubricant, Monomer, Other Processing Aids	PUR, PVC	Automotive, Building & Construction, Electrical and Electronic Equipment, Food-contact plastics, Household items, furniture and other, Packaging, Textiles	1	14	Canada, China, EU, Japan, Malaysia, Nordic Countries, OECD, Philippines, South Korea, Switzerland, Taiwan, Turkey, United States, Vietnam	10	100		1000	1000		1					0.5	0	0	0.5	0.5	1	0	1	1	3	1	high	1	Rotterdam Convention (EU PIC List), EU REACH Authorisation, EU REACH SVHC		0	0	0	0
316	'50-32-8	Benzo[a]pyrene	FMMWHPNWAFZXNH-UHFFFAOYSA-N	InChI=1S/C20H12/c1-2-7-17-15(4-1)12-16-9-8-13-5-3-6-14-10-11-18(17)20(16)19(13)14/h1-12H	C1=CC2=CC3=CC=C4C=CC=C5C=CC(=C2C=C1)C3=C45	C20 H12	252.094		819804-28-9	Crosslinking Agent, Filler, Lubricant, Other Processing Aids, Plasticizer	ABS, EPS, HDPE, HIPS, LDPE, Other - Bioplastic, Other - Rubber, Other - Thermoplastic, PA, PC, PET, PP, PS, PUR, PVC	Agriculture, Automotive, Building & Construction, Textiles	0	12	Canada, China, EU, Mexico, Nordic Countries, Philippines, Russia, South Korea, Taiwan, Thailand, United States, Vietnam		10000	100000		110000	1	1	1	1	1	1	1	1	1	1	0.5	1	0		3	6.5	1	high	1	Stockholm Convention (EU POP List), EU REACH Restriction, EU REACH SVHC, USA - California Proposition 65		0	0	0	0
318	'120-12-7	Anthracene	MWPLVEDNUUSJAV-UHFFFAOYSA-N	InChI=1S/C14H10/c1-2-6-12-10-14-8-4-3-7-13(14)9-11(12)5-1/h1-10H	C1=CC2=CC3=C(C=CC=C3)C=C2C=C1	C14 H10	178.078			Antioxidant, Colorant, Plasticizer	ABS, EPS, HDPE, HIPS, LDPE, Other - Bioplastic, Other - Rubber, Other - Thermoplastic, PA, PC, PET, PP, PS, PUR, PVC	Automotive	0	14	Canada, China, EU, Japan, Mexico, New Zealand, Nordic Countries, OECD, Philippines, South Korea, Taiwan, Thailand, United States, Vietnam		0	100	1000	1000	1	0	1	0	1	0	1	1	0	0	0	1	0		3	4	1	high	1	EU REACH SVHC		0	0	0	0
320	'193-39-5	Indeno[1,2,3-cd]pyrene	SXQBHARYMNFBPS-UHFFFAOYSA-N	InChI=1S/C22H12/c1-2-7-17-16(6-1)18-11-10-14-9-8-13-4-3-5-15-12-19(17)22(18)21(14)20(13)15/h1-12H	C1=CC2=C(C=C1)C1=C3C2=CC2=C4C(C=CC(C=C1)=C34)=CC=C2	C22 H12	276.094		348085-46-1	Plasticizer	ABS, EPS, HDPE, HIPS, LDPE, Other - Bioplastic, Other - Rubber, Other - Thermoplastic, PA, PC, PET, PP, PS, PUR, PVC		0	7	EU, Mexico, New Zealand, Nordic Countries, Taiwan, United States, Vietnam		10	1000		1010		1					0.5	0.5	0	0	0	1	0		1	1.5	1	high	1	Stockholm Convention (EU POP List), USA - California Proposition 65		0	0	0	0
325	'65996-93-2	Pitch, coal tar, high-temp.				Unspecified				Colorant, Crosslinking Agent, Filler, Intermediates, Other Processing Aids, Plasticizer	ABS, EPS, HDPE, HIPS, LDPE, Other - Bioplastic, Other - Thermoplastic, PA, PC, PET, PP, PS, PUR, PVC		0	14	Canada, China, EU, Japan, Mexico, Nordic Countries, OECD, Philippines, Russia, South Korea, Taiwan, Turkey, United States, Vietnam	1000000	1000000	1000000	1000	2000000	1	1	1	1	1	1	1	1	1	1	1	1	0		3	7	1	high	1	EU REACH Authorisation, EU REACH SVHC		0	0	0	0
326	'90640-80-5	Anthracene oil				Unspecified				Colorant, Intermediates, Plasticizer	ABS, EPS, HDPE, HIPS, LDPE, Other - Bioplastic, Other - Thermoplastic, PA, PC, PET, PP, PS, PUR, PVC		0	8	China, EU, New Zealand, Nordic Countries, OECD, South Korea, Taiwan, United States	100000	100		1000	100000	1	1	1	1	1	1	1	1	1	0.5	0	0	0		3	4.5	1	high	1	Rotterdam Convention (EU PIC List), EU REACH Restriction, EU REACH Authorisation, EU REACH SVHC		0	0	0	0
327	'90640-81-6	Anthracene oil, anthracene paste				Unspecified				Colorant, Intermediates, Plasticizer	ABS, EPS, HDPE, HIPS, LDPE, Other - Bioplastic, Other - Thermoplastic, PA, PC, PET, PP, PS, PUR, PVC		0	4	Australia, EU, OECD, Russia				1000	1000	1	1	1	1	1	1	1	1	1	0.5	0	0	0		3	4.5	1	high	1	EU REACH SVHC		0	0	0	0
328	'90640-82-7	Anthracene oil, anthracene-low				Unspecified				Colorant, Filler, Intermediates, Plasticizer	ABS, EPS, HDPE, HIPS, LDPE, Other - Bioplastic, Other - Thermoplastic, PA, PC, PET, PP, PS, PUR, PVC		0	6	EU, New Zealand, Nordic Countries, OECD, Russia, Vietnam		100		1000	1000	1	1	1	1	1	1	1	1	1	0	0	0	0		3	4	1	high	1	EU REACH SVHC		0	0	0	0
329	'90640-86-1	Distillates (coal tar), heavy oils				Unspecified				Plasticizer	ABS, EPS, HDPE, HIPS, LDPE, Other - Bioplastic, Other - Thermoplastic, PA, PC, PET, PP, PS, PUR, PVC		0	8	EU, Nordic Countries, OECD, South Korea, Taiwan, Turkey, United States, Vietnam	1000000	0	100	1000	1000100		1					1	1	1	0.5	0.5	0	0		1	3	1	high	0			0	0	0	0
330	'91995-15-2	Anthracene oil, anthracene paste, anthracene fraction				Unspecified				Plasticizer	ABS, EPS, HDPE, HIPS, LDPE, Other - Bioplastic, Other - Thermoplastic, PA, PC, PET, PP, PS, PUR, PVC		0	3	EU, OECD, Russia				1000	1000	1	1	1	1	1	1	1	1	1	0	0	0	0		3	4	1	high	1	EU REACH SVHC		0	0	0	0
331	'91995-17-4	Anthracene oil, anthracene paste, distn. lights				Unspecified				Colorant, Intermediates, Plasticizer	ABS, EPS, HDPE, HIPS, LDPE, Other - Bioplastic, Other - Thermoplastic, PA, PC, PET, PP, PS, PUR, PVC		0	3	EU, Nordic Countries, OECD		0		1000	1000	1	1	1	1	1	1	1	1	1	0	0	0	0		3	4	1	high	1	EU REACH SVHC		0	0	0	0
332	'1330-43-4	Boron sodium oxide (B4Na2O7)	RPAYJVFLNVKVRS-UHFFFAOYSA-N	InChI=1S/B4O7.2Na/c5-1-9-3(7)11-4(8)10-2-6;;/q-2;2*+1	[Na+].[Na+].[O-]B(OB=O)OB([O-])OB=O	B4 Na2 O7	201.981		1332-28-1, 12045-54-4, 12589-17-2, 13764-83-5, 19223-62-2, 37199-25-0, 115372-65-1, 136349-33-2, 163701-93-7, 886584-11-8, 910783-70-9, 950582-57-7, 1039387-27-3, 1186126-93-1, 1189141-72-7, 1242163-02-5, 1247014-60-3, 1262222-67-2, 1262281-53-7, 1268472-42-9, 1314012-56-0, 1315317-92-0, 2123562-10-5	Antistatic Agent, Biocide, Colorant, Filler, Flame Retardant, Intermediates, Light Stabilizer, Lubricant, Other Processing Aids	HDPE, LDPE, PA, PP, PVC	Agriculture, Automotive, Building & Construction, Electrical and Electronic Equipment, Food-contact plastics, Household items, furniture and other, Packaging, Textiles, Toys	1	16	Canada, China, EU, Japan, Malaysia, Mexico, Nordic Countries, OECD, Philippines, Russia, South Korea, Taiwan, Thailand, Turkey, United States, Vietnam	1000000	10000	10000000	1000	11000000		1					1	0	0	1	1	0.5	0		1	2.5	1	high	1	EU Toys directive	EU Food Contact Materials Positive List, USA Food Contact Materials Positive List (GRAS)	1	1	1	0
333	'1303-96-4	Borax (B4Na2O7.10H2O)	CDMADVZSLOHIFP-UHFFFAOYSA-N	InChI=1S/B4O7.2Na.10H2O/c5-1-7-3-9-2(6)10-4(8-1)11-3;;;;;;;;;;;;/h;;;10*1H2/q-2;2*+1;;;;;;;;;;	O.O.O.O.O.O.O.O.O.O.[Na+].[Na+].[O-]B1OB2OB([O-])OB(O1)O2	B4 Na2 O7 . 10 H2 O	382.087		1344-90-7, 12322-85-9, 12447-40-4, 61028-24-8, 71377-02-1, 910783-71-0, 950582-60-2, 1242163-03-6, 1443500-22-8, 1820039-99-3	Antistatic Agent, Biocide, Colorant, Filler, Flame Retardant, Light Stabilizer, Lubricant, Other Processing Aids	HDPE, LDPE, PP, PVC	Automotive, Building & Construction, Electrical and Electronic Equipment, Textiles	0	13	Canada, China, EU, Malaysia, Mexico, Nordic Countries, OECD, Philippines, South Korea, Taiwan, Thailand, United States, Vietnam		10000	1000	1000	11000		1					1	0	0	1	1	0	0		1	2	1	high	1	EU Toys directive	USA Food Contact Materials Positive List (GRAS)	1	0	1	0
334	'12179-04-3	Boron sodium oxide (B4Na2O7), hydrate (1:5)	QZSYXKPOZFXCDM-UHFFFAOYSA-N	InChI=1S/B4O7.2Na.5H2O/c5-1-9-3(7)11-4(8)10-2-6;;;;;;;/h;;;5*1H2/q-2;2*+1;;;;;	O.O.O.O.O.[Na+].[Na+].[O-]B(OB=O)OB([O-])OB=O	B4 Na2 O7 . 5 H2 O	292.034		910783-72-1, 950582-74-8, 1039387-28-4, 1186126-94-2, 1262222-68-3, 1262281-54-8, 1262426-51-6	Antistatic Agent, Biocide, Colorant, Flame Retardant, Light Stabilizer, Lubricant, Other Processing Aids	HDPE, LDPE, PA, PP, PVC	Automotive, Building & Construction, Electrical and Electronic Equipment, Textiles	0	11	China, EU, Malaysia, Nordic Countries, OECD, Philippines, Russia, Taiwan, Thailand, United States, Vietnam		10000		1000	10000		1					1	0	0	1	0	0	0		1	1	1	high	1	EU Toys directive		0	0	0	0
335	'68515-50-4	1,2-Benzenedicarboxylic acid, 1,2-dihexyl ester, branched and linear				Unspecified				Lubricant, Plasticizer	Other - Bioplastic, Other - Thermoplastic, PUR, PVC	Automotive, Building & Construction, Household items, furniture and other, Textiles, Toys	0	12	Canada, China, EU, Japan, New Zealand, Nordic Countries, OECD, Philippines, South Korea, Taiwan, United States, Vietnam		10		1000	1000		1					1	0	0	1	0	0	0		1	1	1	high	1	EU REACH Authorisation, EU REACH SVHC		0	0	0	0
339	'84-61-7	1,2-Benzenedicarboxylic acid, 1,2-dicyclohexyl ester	VOWAEIGWURALJQ-UHFFFAOYSA-N	InChI=1S/C20H26O4/c21-19(23-15-9-3-1-4-10-15)17-13-7-8-14-18(17)20(22)24-16-11-5-2-6-12-16/h7-8,13-16H,1-6,9-12H2	O=C(OC1CCCCC1)C1=C(C=CC=C1)C(=O)OC1CCCCC1	C20 H26 O4	330.183		55819-02-8, 169741-16-6	Colorant, Crosslinking Agent, Filler, Other Processing Aids, Plasticizer	Other - Bioplastic, Other - Thermoplastic, PUR, PVC	Automotive, Building & Construction, Electrical and Electronic Equipment, Food-contact plastics, Household items, furniture and other, Packaging, Textiles, Toys	1	15	Canada, China, EU, Japan, Mexico, Nordic Countries, OECD, Philippines, Russia, South Korea, Taiwan, Thailand, Turkey, United States, Vietnam	10000	10	1000	1000	11000		1					1	0	0	1	0	0	0	1	1	2	1	high	1	EU REACH SVHC	USA Food Contact Materials Positive List (GRAS), Japan Food Contact Materials Postiive List	1	0	1	1
340	'26761-40-0	1,2-Benzenedicarboxylic acid, 1,2-diisodecyl ester			C*.C*.CCCCCCCCCOC(=O)C1=C(C=CC=C1)C(=O)OCCCCCCCCC |c:16,18,t:14,lp:13:2,15:2,23:2,24:2,m:1:5.6.7.8.9.10.11.12,3:25.26.27.28.29.30.31.32|	C28 H46 O4			1341-39-5, 105009-98-1, 148384-02-5	Biocide, Colorant, Filler, Lubricant, Other Processing Aids, Plasticizer	ABS, Other - Bioplastic, Other - Rubber, Other - Thermoplastic, PS, PUR, PVC	Automotive, Building & Construction, Electrical and Electronic Equipment, Food-contact plastics, Household items, furniture and other, Hygiene and Medical items, Packaging, Textiles, Toys	1	14	Canada, China, EU, Japan, Mexico, Nordic Countries, OECD, Philippines, South Korea, Taiwan, Thailand, Turkey, United States, Vietnam		1000	10000	1000	11000		1					0.5	0	0	0.5	0	1	0		1	1.5	1	high	1	EU REACH Restriction	USA Food Contact Materials Positive List (GRAS), Japan Food Contact Materials Postiive List	1	0	1	1
350	'103-23-1	Hexanedioic acid, 1,6-bis(2-ethylhexyl) ester	SAOKZLXYCUGLFA-UHFFFAOYSA-N	InChI=1/C22H42O4/c1-5-9-13-19(7-3)17-25-21(23)15-11-12-16-22(24)26-18-20(8-4)14-10-6-2/h19-20H,5-18H2,1-4H3	CCCCC(CC)COC(=O)CCCCC(=O)OCC(CC)CCCC	C22 H42 O4	370.308		39393-67-4, 63637-48-9, 70147-21-6, 2093095-12-4	Biocide, Colorant, Filler, Intermediates, Lubricant, Odor Agent, Other Processing Aids, Plasticizer, Solvent	ABS, HDPE, LDPE, Other - Bioplastic, Other - Rubber, Other - Thermoplastic, PA, PET, PP, PS, PUR, PVC	Agriculture, Automotive, Building & Construction, Electrical and Electronic Equipment, Food-contact plastics, Household items, furniture and other, Hygiene and Medical items, Packaging, Textiles, Toys	1	15	Canada, China, EU, Malaysia, Mexico, Nordic Countries, OECD, Philippines, Russia, South Korea, Taiwan, Thailand, Turkey, United States, Vietnam	100000	1000	100000	1000	200000		1					0.5	0.5	0	0.5	0	1	0		1	2	1	high	0		EU Food Contact Materials Positive List, USA Food Contact Materials Positive List (GRAS), Japan Food Contact Materials Postiive List	1	1	1	1
369	'119-47-1	Phenol, 2,2'-methylenebis[6-(1,1-dimethylethyl)-4-methyl-	KGRVJHAUYBGFFP-UHFFFAOYSA-N	InChI=1S/C23H32O2/c1-14-9-16(20(24)18(11-14)22(3,4)5)13-17-10-15(2)12-19(21(17)25)23(6,7)8/h9-12,24-25H,13H2,1-8H3	CC1=CC(CC2=CC(C)=CC(=C2O)C(C)(C)C)=C(O)C(=C1)C(C)(C)C	C23 H32 O2	340.24		12737-12-1, 37268-48-7, 52683-48-4, 53807-25-3, 54650-81-6, 56509-58-1, 59112-68-4, 62339-93-9, 67556-84-7, 69645-40-5, 90297-42-0, 92880-05-2, 107397-49-9, 110736-51-1, 111214-56-3, 129514-93-8, 149984-87-2, 537040-81-6	Antioxidant, Filler, Heat Stabilizer, Initiator, Light Stabilizer, Lubricant, Other Processing Aids, Plasticizer	ABS, HDPE, LDPE, Other - Bioplastic, Other - Rubber, Other - Thermoplastic, PET, PP, PS	Building & Construction, Food-contact plastics, Household items, furniture and other, Packaging, Textiles, Toys	1	15	Canada, China, EU, Japan, Mexico, Nordic Countries, OECD, Philippines, Russia, South Korea, Taiwan, Thailand, Turkey, United States, Vietnam	10000	10	10000	1000	20000		1					1	0	0	1	0	0	0		1	1	1	high	0		EU Food Contact Materials Positive List, USA Food Contact Materials Positive List (GRAS), Japan Food Contact Materials Postiive List	1	1	1	1
371	'120-78-5	Benzothiazole, 2,2'-dithiobis-	AFZSMODLJJCVPP-UHFFFAOYSA-N	InChI=1S/C14H8N2S4/c1-3-7-11-9(5-1)15-13(17-11)19-20-14-16-10-6-2-4-8-12(10)18-14/h1-8H	S(SC1=NC2=C(S1)C=CC=C2)C1=NC2=C(S1)C=CC=C2	C14 H8 N2 S4	331.957		109767-80-8, 137497-18-8, 186983-60-8, 258278-97-6, 2293932-50-8	Catalyst, Colorant, Crosslinking Agent, Filler, Initiator, Light Stabilizer, Other Processing Aids, Plasticizer	Other - Rubber	Agriculture, Automotive, Building & Construction, Food-contact plastics, Household items, furniture and other, Packaging, Textiles	1	17	Canada, China, EU, Japan, Malaysia, Mexico, New Zealand, Nordic Countries, OECD, Philippines, Russia, South Korea, Taiwan, Thailand, Turkey, United States, Vietnam	100000	100	100000	1000	200000		1					0.5	0	0	0.5	0.5	1	0		1	2	1	high	0		USA Food Contact Materials Positive List (GRAS)	1	0	1	0
372	'121-79-9	Benzoic acid, 3,4,5-trihydroxy-, propyl ester	ZTHYODDOHIVTJV-UHFFFAOYSA-N	InChI=1S/C10H12O5/c1-2-3-15-10(14)6-4-7(11)9(13)8(12)5-6/h4-5,11-13H,2-3H2,1H3	CCCOC(=O)C1=CC(O)=C(O)C(O)=C1	C10 H12 O5	212.068		56274-95-4	Antioxidant, Light Stabilizer	HDPE, LDPE, PP, PVC	Food-contact plastics, Packaging	1	15	Canada, China, EU, Japan, Malaysia, Mexico, Nordic Countries, Philippines, Russia, South Korea, Taiwan, Thailand, Turkey, United States, Vietnam	1000	10	1000		2000		1					0	0	0	0	0	1	0		1	1	1	high	0		EU Food Contact Materials Positive List, USA Food Contact Materials Positive List (GRAS), Japan Food Contact Materials Postiive List	1	1	1	1
377	'1241-94-7	Phosphoric acid, 2-ethylhexyl diphenyl ester	CGSLYBDCEGBZCG-UHFFFAOYSA-N	InChI=1/C20H27O4P/c1-3-5-12-18(4-2)17-22-25(21,23-19-13-8-6-9-14-19)24-20-15-10-7-11-16-20/h6-11,13-16,18H,3-5,12,17H2,1-2H3	CCCCC(CC)COP(=O)(OC1=CC=CC=C1)OC1=CC=CC=C1	C20 H27 O4 P	362.165			Colorant, Flame Retardant, Intermediates, Lubricant, Other Processing Aids, Plasticizer	ABS, Other - Bioplastic, Other - Rubber, Other - Thermoplastic, PET, PS, PUR, PVC	Automotive, Building & Construction, Electrical and Electronic Equipment, Food-contact plastics, Household items, furniture and other, Packaging, Textiles, Toys	1	14	Canada, China, EU, Japan, Mexico, New Zealand, Nordic Countries, OECD, Philippines, South Korea, Taiwan, Turkey, United States, Vietnam	10000	10	10000	1000	20000	0	0	0	0	0	0	0	0	0	0	0.5	1	0		1	1.5	1	high	0		EU Food Contact Materials Positive List, USA Food Contact Materials Positive List (GRAS), Japan Food Contact Materials Postiive List	1	1	1	1
381	'128-37-0	Phenol, 2,6-bis(1,1-dimethylethyl)-4-methyl-	NLZUEZXRPGMBCV-UHFFFAOYSA-N	InChI=1S/C15H24O/c1-10-8-11(14(2,3)4)13(16)12(9-10)15(5,6)7/h8-9,16H,1-7H3	CC1=CC(=C(O)C(=C1)C(C)(C)C)C(C)(C)C	C15 H24 O	220.183		36631-28-4, 42615-30-5, 50356-19-9, 50641-99-1, 52683-46-2, 53571-70-3, 58500-82-6, 83047-16-9, 97123-41-6, 102962-45-8, 259752-53-9, 290348-23-1, 338986-13-3, 1394965-02-6, 1456709-94-6, 2055662-96-7	Antioxidant, Biocide, Catalyst, Colorant, Crosslinking Agent, Filler, Heat Stabilizer, Initiator, Intermediates, Light Stabilizer, Lubricant, Odor Agent, Other Processing Aids, Plasticizer	ABS, HDPE, HIPS, LDPE, Other - Bioplastic, Other - Rubber, Other - Thermoplastic, PA, PET, PP, PS, PUR, PVC	Agriculture, Automotive, Building & Construction, Electrical and Electronic Equipment, Food-contact plastics, Household items, furniture and other, Hygiene and Medical items, Packaging, Textiles, Toys	1	16	Canada, China, EU, Japan, Malaysia, Mexico, Nordic Countries, OECD, Philippines, Russia, South Korea, Taiwan, Thailand, Turkey, United States, Vietnam	10000	1000	100000	1000	110000		1					1	1	1	0.5	0.5	1	1	0.5	1	4.5	1	high	0		EU Food Contact Materials Positive List, USA Food Contact Materials Positive List (GRAS), Japan Food Contact Materials Postiive List	1	1	1	1
385	'131-57-7	Methanone, (2-hydroxy-4-methoxyphenyl)phenyl-	DXGLGDHPHMLXJC-UHFFFAOYSA-N	InChI=1S/C14H12O3/c1-17-11-7-8-12(13(15)9-11)14(16)10-5-3-2-4-6-10/h2-9,15H,1H3	COC1=CC=C(C(=O)C2=CC=CC=C2)C(O)=C1	C14 H12 O3	228.079		14375-37-2, 58392-15-7, 58392-22-6, 138464-23-0, 153859-73-5, 897050-18-9, 2216794-47-5	Antioxidant, Colorant, Filler, Light Stabilizer, Other Processing Aids	ABS, HDPE, LDPE, Other - Bioplastic, Other - Rubber, Other - Thermoplastic, PA, PC, PET, PP, PS, PUR, PVC	Automotive, Building & Construction, Electrical and Electronic Equipment, Food-contact plastics, Household items, furniture and other, Packaging, Textiles	1	13	Canada, China, EU, Japan, Mexico, Nordic Countries, Philippines, South Korea, Taiwan, Thailand, Turkey, United States, Vietnam	1000	100	1000		2000		1					0	0	0	0	0.5	1	0	0.5	1	2	1	high	0		EU Food Contact Materials Positive List, USA Food Contact Materials Positive List (GRAS), Japan Food Contact Materials Postiive List	1	1	1	1
387	'1330-78-5	Phosphoric acid, tris(methylphenyl) ester				C21 H21 O4 P			25013-17-6, 34902-62-0, 56499-45-7, 56573-10-5, 69234-04-4, 1259372-53-6, 2107376-26-9	Colorant, Flame Retardant, Intermediates, Lubricant, Other Processing Aids, Plasticizer, Solvent	HDPE, LDPE, Other - Bioplastic, Other - Rubber, PS, PUR, PVC	Agriculture, Automotive, Building & Construction, Electrical and Electronic Equipment, Household items, furniture and other, Packaging, Textiles	0	16	Canada, China, EU, Japan, Malaysia, Mexico, Nordic Countries, OECD, Philippines, Russia, South Korea, Taiwan, Thailand, Turkey, United States, Vietnam	10000	10	10000	1000	20000	0.5	0.5	0.5	0.5	0.5	0.5	1	0	0	1	1	1	0		1	3	1	high	0		Japan Food Contact Materials Postiive List	1	0	0	1
393	'14324-55-1	Zinc, bis(N,N-diethylcarbamodithioato-╬║S,╬║S')-, (T-4)-	RKQOSDAEEGPRER-UHFFFAOYSA-L	InChI=1S/2C5H11NS2.Zn/c2*1-3-6(4-2)5(7)8;/h2*3-4H2,1-2H3,(H,7,8);/q;;+2/p-2	[Zn++].CCN(CC)C([S-])=S.CCN(CC)C([S-])=S	C10 H20 N2 S4 Zn	359.98	505093-56-1	136-94-7, 14460-21-0, 15465-13-1, 18445-58-4, 32733-02-1, 39456-86-5, 92481-10-2, 115028-55-2, 120092-57-1, 880359-15-9, 905572-85-2, 2169916-09-8	Catalyst, Crosslinking Agent, Initiator, Light Stabilizer	HDPE, LDPE, Other - Rubber	Food-contact plastics, Packaging, Textiles	1	14	Canada, China, EU, Japan, Malaysia, Nordic Countries, OECD, Philippines, South Korea, Taiwan, Thailand, Turkey, United States, Vietnam	10000	100	1000	1000	11000		1					0	0	0	0	0.5	1	0		1	1.5	1	high	1	EU Toys directive	USA Food Contact Materials Positive List (GRAS), Japan Food Contact Materials Postiive List	1	0	1	1
395	'1478-61-1	Phenol, 4,4'-[2,2,2-trifluoro-1-(trifluoromethyl)ethylidene]bis-	ZFVMWEVVKGLCIJ-UHFFFAOYSA-N	InChI=1S/C15H10F6O2/c16-14(17,18)13(15(19,20)21,9-1-5-11(22)6-2-9)10-3-7-12(23)8-4-10/h1-8,22-23H	OC1=CC=C(C=C1)C(C1=CC=C(O)C=C1)(C(F)(F)F)C(F)(F)F	C15 H10 F6 O2	336.058		110444-90-1, 1429425-28-4	Biocide, Monomer, Other Processing Aids			0	12	Canada, China, EU, Japan, New Zealand, Nordic Countries, Philippines, South Korea, Taiwan, Thailand, United States, Vietnam	1000	1	10000		11000		1					1	0	0	1	0.5	1	0		1	2.5	1	high	0			0	0	0	0
396	'149-30-4	2(3H)-Benzothiazolethione	YXIWHUQXZSMYRE-UHFFFAOYSA-N	InChI=1S/C7H5NS2/c9-7-8-5-3-1-2-4-6(5)10-7/h1-4H,(H,8,9)	SC1=NC2=C(S1)C=CC=C2	C7 H5 N S2	166.986	27157-85-3	1321-08-0, 4464-58-8, 12640-90-3, 55199-93-4, 81605-65-4, 112242-83-8, 119170-41-1, 885216-62-6, 2213445-86-2	Antioxidant, Biocide, Catalyst, Crosslinking Agent, Initiator, Intermediates, Light Stabilizer, Other Processing Aids, Plasticizer	Other - Rubber	Automotive, Building & Construction, Electrical and Electronic Equipment, Food-contact plastics, Household items, furniture and other, Packaging, Textiles	1	16	Canada, China, EU, Japan, Malaysia, Mexico, Nordic Countries, OECD, Philippines, Russia, South Korea, Taiwan, Thailand, Turkey, United States, Vietnam	10000	100	10000	1000	20000		1					1	1	0	0	0	1	0		1	2	1	high	1	USA - California Proposition 65	USA Food Contact Materials Positive List (GRAS)	1	0	1	0
404	'17540-75-9	Phenol, 2,6-bis(1,1-dimethylethyl)-4-(1-methylpropyl)-	BFZOTKYPSZSDEV-UHFFFAOYSA-N	InChI=1/C18H30O/c1-9-12(2)13-10-14(17(3,4)5)16(19)15(11-13)18(6,7)8/h10-12,19H,9H2,1-8H3	CCC(C)C1=CC(=C(O)C(=C1)C(C)(C)C)C(C)(C)C	C18 H30 O	262.23			Antioxidant, Other Processing Aids	PVC	Building & Construction, Food-contact plastics, Packaging	1	14	Canada, China, EU, Japan, Mexico, New Zealand, Nordic Countries, OECD, Philippines, Russia, South Korea, Taiwan, United States, Vietnam	100	1	-1	1000	1000		1					0	0	0	0	0.5	1	0		1	1.5	1	high	0		USA Food Contact Materials Positive List (GRAS)	1	0	1	0
422	'26741-53-7	2,4,8,10-Tetraoxa-3,9-diphosphaspiro[5.5]undecane, 3,9-bis[2,4-bis(1,1-dimethylethyl)phenoxy]-	AIBRSVLEQRWAEG-UHFFFAOYSA-N	InChI=1S/C33H50O6P2/c1-29(2,3)23-13-15-27(25(17-23)31(7,8)9)38-40-34-19-33(20-35-40)21-36-41(37-22-33)39-28-16-14-24(30(4,5)6)18-26(28)32(10,11)12/h13-18H,19-22H2,1-12H3	CC(C)(C)C1=CC(=C(OP2OCC3(CO2)COP(OC2=C(C=C(C=C2)C(C)(C)C)C(C)(C)C)OC3)C=C1)C(C)(C)C	C33 H50 O6 P2	604.308		87498-44-0, 106234-83-7, 940968-66-1, 1233874-33-3, 1251905-26-6, 1627542-98-6	Antioxidant, Catalyst, Colorant, Filler, Initiator, Light Stabilizer, Other Processing Aids	ABS, HDPE, LDPE, Other - Bioplastic, Other - Rubber, Other - Thermoplastic, PA, PC, PET, PP, PS, PUR, PVC	Automotive, Building & Construction, Food-contact plastics, Household items, furniture and other, Packaging, Toys	1	16	Canada, China, EU, Japan, Mexico, New Zealand, Nordic Countries, OECD, Philippines, Russia, South Korea, Taiwan, Thailand, Turkey, United States, Vietnam	10000	10	10000	1000	20000		1					0	0	0	0	0	1	0		1	1	1	high	0		EU Food Contact Materials Positive List, USA Food Contact Materials Positive List (GRAS), Japan Food Contact Materials Postiive List	1	1	1	1
423	'26780-96-1	Quinoline, 1,2-dihydro-2,2,4-trimethyl-, homopolymer				(C12 H15 N)x			52038-43-4, 55069-42-6, 88160-96-7, 125004-27-5, 219315-49-8, 870479-53-1, 909801-79-2, 1843183-86-7, 2376916-19-5	Antioxidant, Heat Stabilizer, Intermediates, Light Stabilizer, Lubricant, Other Processing Aids	HDPE, LDPE, Other - Rubber	Agriculture, Automotive, Building & Construction, Electrical and Electronic Equipment, Food-contact plastics, Household items, furniture and other, Packaging, Textiles	1	17	Canada, China, EU, Japan, Malaysia, Mexico, New Zealand, Nordic Countries, OECD, Philippines, Russia, South Korea, Taiwan, Thailand, Turkey, United States, Vietnam	100000	1000	10000	1000	110000		1					0	0	0	0	0	1	0		1	1	1	high	0		USA Food Contact Materials Positive List (GRAS)	1	0	1	0
425	'27554-26-3	1,2-Benzenedicarboxylic acid, 1,2-diisooctyl ester				C24 H38 O4			1330-91-2, 25103-50-8, 41375-90-0	Lubricant, Plasticizer	PVC	Automotive, Building & Construction, Hygiene and Medical items, Textiles, Toys	0	12	Canada, China, EU, Japan, Nordic Countries, OECD, Philippines, Russia, South Korea, Taiwan, United States, Vietnam		10	-1	1000	1000		1					1	0	0	1	0	0	0		1	1	1	high	0		USA Food Contact Materials Positive List (GRAS)	1	0	1	0
427	'28553-12-0	1,2-Benzenedicarboxylic acid, 1,2-diisononyl ester			C*.C*.CCCCCCCCOC(=O)C1=C(C=CC=C1)C(=O)OCCCCCCCC |c:15,17,t:13,lp:12:2,14:2,22:2,23:2,m:1:24.25.26.27.28.29.30,3:5.6.7.8.9.10.11|	C26 H42 O4			41375-91-1, 58033-90-2, 105009-97-0	Biocide, Colorant, Crosslinking Agent, Filler, Lubricant, Other Processing Aids, Plasticizer	ABS, Other - Bioplastic, Other - Rubber, Other - Thermoplastic, PS, PUR, PVC	Agriculture, Automotive, Building & Construction, Electrical and Electronic Equipment, Food-contact plastics, Household items, furniture and other, Hygiene and Medical items, Packaging, Textiles, Toys	1	15	Canada, China, EU, Japan, Mexico, Nordic Countries, OECD, Philippines, Russia, South Korea, Taiwan, Thailand, Turkey, United States, Vietnam	1000000	10000	1000000	1000	2000000		1					0.5	0	0	0.5	0	1	0		1	1.5	1	high	1	EU REACH Restriction	USA Food Contact Materials Positive List (GRAS), Japan Food Contact Materials Postiive List	1	0	1	1
431	'29761-21-5	Phosphoric acid, isodecyl diphenyl ester			C*.CCCCCCCCCOP(=O)(OC1=CC=CC=C1)OC1=CC=CC=C1 |c:16,18,24,26,t:14,22,lp:11:2,13:2,14:2,21:2,m:1:10.9.8.7.6.5.4.3|	C22 H31 O4 P			59800-46-3, 146480-14-0, 1620815-46-4	Colorant, Flame Retardant, Other Processing Aids, Plasticizer	ABS, Other - Bioplastic, Other - Rubber, Other - Thermoplastic, PS, PUR, PVC	Automotive, Building & Construction, Household items, furniture and other, Textiles	0	13	Canada, China, EU, Japan, New Zealand, Nordic Countries, OECD, Philippines, Russia, South Korea, Taiwan, Turkey, United States	1000	100	-1	1000	1000	0	0	0	0	0	0	0	0	0	0	0	1	0		1	1	1	high	0			0	0	0	0
433	'3081-14-9	1,4-Benzenediamine, N1,N4-bis(1,4-dimethylpentyl)-	ZJNLYGOUHDJHMG-UHFFFAOYSA-N	InChI=1/C20H36N2/c1-15(2)7-9-17(5)21-19-11-13-20(14-12-19)22-18(6)10-8-16(3)4/h11-18,21-22H,7-10H2,1-6H3	CC(C)CCC(C)NC1=CC=C(NC(C)CCC(C)C)C=C1	C20 H36 N2	304.288		583049-46-1	Antioxidant, Light Stabilizer, Other Processing Aids	Other - Rubber	Agriculture, Automotive, Textiles	0	13	Canada, China, EU, Japan, New Zealand, Nordic Countries, OECD, Philippines, South Korea, Taiwan, Turkey, United States, Vietnam	10000	0	10000	1000	20000	0	0	0	0	0	0	0	0	0	0	0	1	0		1	1	1	high	0			0	0	0	0
438	'32687-78-8	Benzenepropanoic acid, 3,5-bis(1,1-dimethylethyl)-4-hydroxy-, 2-[3-[3,5-bis(1,1-dimethylethyl)-4-hydroxyphenyl]-1-oxopropyl]hydrazide	HCILJBJJZALOAL-UHFFFAOYSA-N	InChI=1S/C34H52N2O4/c1-31(2,3)23-17-21(18-24(29(23)39)32(4,5)6)13-15-27(37)35-36-28(38)16-14-22-19-25(33(7,8)9)30(40)26(20-22)34(10,11)12/h17-20,39-40H,13-16H2,1-12H3,(H,35,37)(H,36,38)	CC(C)(C)C1=CC(CCC(=O)NNC(=O)CCC2=CC(=C(O)C(=C2)C(C)(C)C)C(C)(C)C)=CC(=C1O)C(C)(C)C	C34 H52 N2 O4	552.393		77137-59-8, 393567-12-9, 2241586-69-4	Antioxidant, Catalyst, Light Stabilizer, Other Processing Aids, Plasticizer	ABS, HDPE, LDPE, Other - Bioplastic, Other - Rubber, Other - Thermoplastic, PA, PC, PET, PP, PS, PUR, PVC	Automotive, Building & Construction, Electrical and Electronic Equipment, Food-contact plastics, Packaging	1	16	Canada, China, EU, Japan, Mexico, New Zealand, Nordic Countries, OECD, Philippines, Russia, South Korea, Taiwan, Thailand, Turkey, United States, Vietnam	1000	100	1000	1000	2000		1					0	0	0	0	0	1	0		1	1	1	high	0		EU Food Contact Materials Positive List, USA Food Contact Materials Positive List (GRAS), Japan Food Contact Materials Postiive List	1	1	1	1
447	'3806-34-6	2,4,8,10-Tetraoxa-3,9-diphosphaspiro[5.5]undecane, 3,9-bis(octadecyloxy)-	PZRWFKGUFWPFID-UHFFFAOYSA-N	InChI=1S/C41H82O6P2/c1-3-5-7-9-11-13-15-17-19-21-23-25-27-29-31-33-35-42-48-44-37-41(38-45-48)39-46-49(47-40-41)43-36-34-32-30-28-26-24-22-20-18-16-14-12-10-8-6-4-2/h3-40H2,1-2H3	CCCCCCCCCCCCCCCCCCOP1OCC2(CO1)COP(OCCCCCCCCCCCCCCCCCC)OC2	C41 H82 O6 P2	732.559		62132-43-8, 86403-19-2, 533936-17-3, 940968-65-0	Antioxidant, Heat Stabilizer, Light Stabilizer, Other Processing Aids	ABS, HDPE, LDPE, Other - Rubber, Other - Thermoplastic, PA, PET, PP, PS, PUR, PVC	Building & Construction, Food-contact plastics, Household items, furniture and other, Packaging, Textiles, Toys	1	13	Canada, China, EU, Japan, New Zealand, Nordic Countries, Philippines, Russia, South Korea, Taiwan, Thailand, United States, Vietnam	1000	0	10000		11000		1					1	0	1	1	0	0	0		1	2	1	high	0		USA Food Contact Materials Positive List (GRAS), Japan Food Contact Materials Postiive List	1	0	1	1
456	'52829-07-9	Decanedioic acid, 1,10-bis(2,2,6,6-tetramethyl-4-piperidinyl) ester	XITRBUPOXXBIJN-UHFFFAOYSA-N	InChI=1S/C28H52N2O4/c1-25(2)17-21(18-26(3,4)29-25)33-23(31)15-13-11-9-10-12-14-16-24(32)34-22-19-27(5,6)30-28(7,8)20-22/h21-22,29-30H,9-20H2,1-8H3	CC1(C)CC(CC(C)(C)N1)OC(=O)CCCCCCCCC(=O)OC1CC(C)(C)NC(C)(C)C1	C28 H52 N2 O4	480.393		64104-43-4, 91450-21-4, 102267-60-7, 115621-65-3, 121449-00-1, 127510-03-6, 149264-42-6, 152787-04-7, 331982-98-0, 908343-48-6, 1444203-63-7, 2042214-43-5	Antioxidant, Biocide, Colorant, Filler, Heat Stabilizer, Intermediates, Light Stabilizer, Lubricant, Monomer, Other Processing Aids	ABS, HDPE, HIPS, LDPE, Other - Rubber, Other - Thermoplastic, PA, PC, PET, PP, PS, PUR, PVC	Agriculture, Automotive, Building & Construction, Electrical and Electronic Equipment, Food-contact plastics, Household items, furniture and other, Packaging, Textiles, Toys	1	16	Canada, China, EU, Japan, Malaysia, Mexico, New Zealand, Nordic Countries, OECD, Philippines, South Korea, Taiwan, Thailand, Turkey, United States, Vietnam	1000	100	10000	1000	11000		1					0	0	0	0	0	1	0		1	1	1	high	0		USA Food Contact Materials Positive List (GRAS), Japan Food Contact Materials Postiive List	1	0	1	1
460	'57-11-4	Octadecanoic acid	QIQXTHQIDYTFRH-UHFFFAOYSA-N	InChI=1S/C18H36O2/c1-2-3-4-5-6-7-8-9-10-11-12-13-14-15-16-17-18(19)20/h2-17H2,1H3,(H,19,20)	CCCCCCCCCCCCCCCCCC(O)=O	C18 H36 O2	284.272		8013-28-3, 8023-06-1, 8037-40-9, 8037-83-0, 8039-51-8, 8039-52-9, 8039-53-0, 8039-54-1, 39390-61-9, 58392-66-8, 82497-27-6, 134503-33-6, 197923-10-7, 294203-07-9, 294203-15-9, 1245726-94-6, 1429745-84-5	Antistatic Agent, Biocide, Catalyst, Colorant, Crosslinking Agent, Filler, Intermediates, Light Stabilizer, Lubricant, Monomer, Odor Agent, Other Processing Aids, Plasticizer	HDPE, LDPE, Other - Bioplastic, Other - Rubber, Other - Thermoplastic, PET, PP, PVC	Agriculture, Automotive, Building & Construction, Electrical and Electronic Equipment, Food-contact plastics, Household items, furniture and other, Hygiene and Medical items, Packaging, Textiles, Toys	1	14	Canada, China, EU, Mexico, Nordic Countries, OECD, Philippines, Russia, South Korea, Taiwan, Thailand, Turkey, United States, Vietnam	100000	1000	1000000	1000	1100000		1					0	0	0	0	0	1	0		1	1	1	high	0		EU Food Contact Materials Positive List, USA Food Contact Materials Positive List (GRAS), Japan Food Contact Materials Postiive List	1	1	1	1
470	'63449-39-8	Paraffin waxes, chloro				Unspecified			8029-39-8, 11098-33-2, 37187-40-9, 39279-65-7, 39406-09-2, 39444-36-5, 50646-90-7, 51990-12-6, 52276-52-5, 52555-47-2, 52622-66-9, 52677-73-3, 52677-74-4, 52677-75-5, 53028-59-4, 53028-60-7, 53200-35-4, 54577-71-8, 55353-50-9, 56509-64-9, 56730-95-1, 58516-52-2, 60202-64-4, 66746-35-8, 108688-63-7, 1818354-19-6, 1909262-92-5	Blowing Agent, Colorant, Crosslinking Agent, Filler, Flame Retardant, Lubricant, Other Processing Aids, Plasticizer, Solvent	HDPE, LDPE, PET, PP, PS, PUR, PVC	Agriculture, Automotive, Building & Construction, Electrical and Electronic Equipment, Food-contact plastics, Household items, furniture and other, Hygiene and Medical items, Packaging, Textiles	1	15	Canada, China, EU, Japan, Mexico, Nordic Countries, OECD, Philippines, Russia, South Korea, Taiwan, Thailand, Turkey, United States, Vietnam	100000	1000	100000	1000	200000		1					0.5	0.5	0	0	1	1	0		1	2.5	1	high	1	Stockholm Convention, Japan CSCL Class I Restriction	USA Food Contact Materials Positive List (GRAS), Japan Food Contact Materials Postiive List	1	0	1	1
473	'65-85-0	Benzoic acid	WPYMKLBDIGXBTP-UHFFFAOYSA-N	InChI=1S/C7H6O2/c8-7(9)6-4-2-1-3-5-6/h1-5H,(H,8,9)	OC(=O)C1=CC=CC=C1	C7 H6 O2	122.037		8013-63-6, 331473-08-6, 2244876-11-5	Antioxidant, Biocide, Catalyst, Colorant, Crosslinking Agent, Filler, Heat Stabilizer, Initiator, Intermediates, Lubricant, Monomer, Odor Agent, Other Processing Aids, Plasticizer	Other - Thermoplastic, PVC	Agriculture, Automotive, Building & Construction, Electrical and Electronic Equipment, Food-contact plastics, Household items, furniture and other, Packaging, Textiles, Toys	1	16	Canada, China, EU, Japan, Malaysia, Mexico, Nordic Countries, OECD, Philippines, Russia, South Korea, Taiwan, Thailand, Turkey, United States, Vietnam	1000000	1000	1000000	1000	2000000		1					0.5	0	0	0.5	1	1	1		1	2.5	1	high	0		EU Food Contact Materials Positive List, USA Food Contact Materials Positive List (GRAS), Japan Food Contact Materials Postiive List	1	1	1	1
474	'6683-19-8	Benzenepropanoic acid, 3,5-bis(1,1-dimethylethyl)-4-hydroxy-, 1,1'-[2,2-bis[[3-[3,5-bis(1,1-dimethylethyl)-4-hydroxyphenyl]-1-oxopropoxy]methyl]-1,3-propanediyl] ester	BGYHLZZASRKEJE-UHFFFAOYSA-N	InChI=1S/C73H108O12/c1-65(2,3)49-33-45(34-50(61(49)78)66(4,5)6)25-29-57(74)82-41-73(42-83-58(75)30-26-46-35-51(67(7,8)9)62(79)52(36-46)68(10,11)12,43-84-59(76)31-27-47-37-53(69(13,14)15)63(80)54(38-47)70(16,17)18)44-85-60(77)32-28-48-39-55(71(19,20)21)64(81)56(40-48)72(22,23)24/h33-40,78-81H,25-32,41-44H2,1-24H3	CC(C)(C)C1=CC(CCC(=O)OCC(COC(=O)CCC2=CC(=C(O)C(=C2)C(C)(C)C)C(C)(C)C)(COC(=O)CCC2=CC(=C(O)C(=C2)C(C)(C)C)C(C)(C)C)COC(=O)CCC2=CC(=C(O)C(=C2)C(C)(C)C)C(C)(C)C)=CC(=C1O)C(C)(C)C	C73 H108 O12	1176.78		5106-16-1, 12634-41-2, 60005-82-5, 67894-72-8, 68882-58-6, 70695-00-0, 98584-37-3, 103843-13-6, 127337-64-8, 131611-06-8, 132503-83-4, 137500-49-3, 145526-73-4, 154508-64-2, 156511-60-3, 245440-68-0, 502635-12-3, 678997-54-1, 702667-02-5, 869093-09-4, 913283-07-5, 937248-86-7, 1209496-25-2, 1234384-04-3, 1427306-01-1, 1801141-34-3, 2042682-13-1, 2091249-41-9, 2135747-59-8, 2169243-97-2, 2179083-7…	Antioxidant, Antistatic Agent, Biocide, Catalyst, Colorant, Filler, Flame Retardant, Initiator, Intermediates, Light Stabilizer, Lubricant, Other Processing Aids	ABS, HDPE, LDPE, Other - Bioplastic, Other - Rubber, Other - Thermoplastic, PA, PC, PET, PP, PS, PUR, PVC	Agriculture, Automotive, Building & Construction, Electrical and Electronic Equipment, Food-contact plastics, Household items, furniture and other, Packaging, Textiles, Toys	1	17	Canada, China, EU, Japan, Malaysia, Mexico, New Zealand, Nordic Countries, OECD, Philippines, Russia, South Korea, Taiwan, Thailand, Turkey, United States, Vietnam	10000	1000	100000	1000	110000		1					1	1	0	0	0	0	0		1	1	1	high	0		EU Food Contact Materials Positive List, USA Food Contact Materials Positive List (GRAS), Japan Food Contact Materials Postiive List	1	1	1	1
476	'68411-46-1	Benzenamine, N-phenyl-, reaction products with 2,4,4-trimethylpentene				Unspecified				Antioxidant, Filler, Light Stabilizer, Lubricant, Other Processing Aids	Other - Bioplastic, Other - Rubber, Other - Thermoplastic, PC, PUR	Agriculture, Automotive, Building & Construction, Electrical and Electronic Equipment, Food-contact plastics, Household items, furniture and other, Packaging, Textiles	1	16	Canada, China, EU, Malaysia, Mexico, New Zealand, Nordic Countries, OECD, Philippines, Russia, South Korea, Taiwan, Thailand, Turkey, United States, Vietnam	100000	100	100000	1000	200000	0.5	0.5	0.5	0.5	0.5	0.5	0	0	0	0	0.5	1	0		1	1.5	1	high	0		USA Food Contact Materials Positive List (GRAS), Japan Food Contact Materials Postiive List	1	0	1	1
477	'68412-48-6	2-Propanone, reaction products with diphenylamine	LJBRXUFICHIMLD-UHFFFAOYSA-N	InChI=1S/C12H23N.C3H6O/c1-3-7-11(8-4-1)13-12-9-5-2-6-10-12;1-3(2)4/h11-13H,1-10H2;1-2H3	CC(C)=O.C1CCC(CC1)NC1CCCCC1	C12 H11 N . C3 H6 O	239.225			Antioxidant, Colorant, Light Stabilizer, Other Processing Aids, Plasticizer	Other - Rubber, PA	Automotive	0	11	Canada, China, EU, Japan, New Zealand, Nordic Countries, Philippines, Taiwan, Thailand, United States, Vietnam	100	1	1000		1100		1					0	0	0	0	0	1	0		1	1	1	high	0			0	0	0	0
480	'68515-48-0	1,2-Benzenedicarboxylic acid, di-C8-10-branched alkyl esters, C9-rich				Unspecified				Biocide, Colorant, Intermediates, Other Processing Aids, Plasticizer	PUR, PVC	Automotive, Building & Construction, Electrical and Electronic Equipment, Food-contact plastics, Household items, furniture and other, Packaging, Textiles, Toys	1	14	Canada, China, EU, Japan, Malaysia, Nordic Countries, OECD, Philippines, South Korea, Taiwan, Thailand, Turkey, United States, Vietnam	1000000	1000	1000000	1000	2000000		1					0.5	0	0	0.5	0	1	0		1	1.5	1	high	1	EU REACH Restriction	EU Food Contact Materials Positive List, Japan Food Contact Materials Postiive List	1	1	0	1
488	'74-31-7	1,4-Benzenediamine, N1,N4-diphenyl-	UTGQNNCQYDRXCH-UHFFFAOYSA-N	InChI=1S/C18H16N2/c1-3-7-15(8-4-1)19-17-11-13-18(14-12-17)20-16-9-5-2-6-10-16/h1-14,19-20H	N(C1=CC=CC=C1)C1=CC=C(NC2=CC=CC=C2)C=C1	C18 H16 N2	260.131		66746-42-7, 72711-53-6, 943443-44-5	Antioxidant, Filler, Light Stabilizer, Monomer	HDPE, LDPE, Other - Rubber, PA	Automotive, Electrical and Electronic Equipment, Food-contact plastics, Packaging	1	16	Canada, China, EU, Japan, Malaysia, New Zealand, Nordic Countries, OECD, Philippines, Russia, South Korea, Taiwan, Thailand, Turkey, United States, Vietnam	1000	10	1000	1000	2000		1					0.5	0	0.5	0.5	0	1	0		1	2	1	high	0		USA Food Contact Materials Positive List (GRAS)	1	0	1	0
492	'77-93-0	1,2,3-Propanetricarboxylic acid, 2-hydroxy-, 1,2,3-triethyl ester	DOOTYTYQINUNNV-UHFFFAOYSA-N	InChI=1S/C12H20O7/c1-4-17-9(13)7-12(16,11(15)19-6-3)8-10(14)18-5-2/h16H,4-8H2,1-3H3	CCOC(=O)CC(O)(CC(=O)OCC)C(=O)OCC	C12 H20 O7	276.121			Antioxidant, Biocide, Colorant, Lubricant, Odor Agent, Other Processing Aids, Plasticizer, Viscosity Modifier	HDPE, LDPE, Other - Bioplastic, Other - Thermoplastic, PP, PUR, PVC	Building & Construction, Electrical and Electronic Equipment, Food-contact plastics, Packaging, Textiles, Toys	1	16	Canada, China, EU, Japan, Mexico, New Zealand, Nordic Countries, OECD, Philippines, Russia, South Korea, Taiwan, Thailand, Turkey, United States, Vietnam	10000	100	10000	1000	20000		1					1	1	1	0	0	0	0		1	2	1	high	0		EU Food Contact Materials Positive List, USA Food Contact Materials Positive List (GRAS), Japan Food Contact Materials Postiive List	1	1	1	1
493	'77-94-1	1,2,3-Propanetricarboxylic acid, 2-hydroxy-, 1,2,3-tributyl ester	ZFOZVQLOBQUTQQ-UHFFFAOYSA-N	InChI=1S/C18H32O7/c1-4-7-10-23-15(19)13-18(22,17(21)25-12-9-6-3)14-16(20)24-11-8-5-2/h22H,4-14H2,1-3H3	CCCCOC(=O)CC(O)(CC(=O)OCCCC)C(=O)OCCCC	C18 H32 O7	360.215		611199-02-1	Colorant, Lubricant, Odor Agent, Other Processing Aids, Plasticizer	Other - Bioplastic, Other - Thermoplastic, PUR, PVC	Automotive, Building & Construction, Electrical and Electronic Equipment, Food-contact plastics, Household items, furniture and other, Hygiene and Medical items, Packaging, Textiles, Toys	1	14	Canada, China, EU, Japan, New Zealand, Nordic Countries, Philippines, Russia, South Korea, Taiwan, Thailand, Turkey, United States, Vietnam	10000	10	10000		20000		1					0	0	0	0	0	1	0	0.5	1	1.5	1	high	0		USA Food Contact Materials Positive List (GRAS), Japan Food Contact Materials Postiive List	1	0	1	1
494	'78-40-0	Phosphoric acid, triethyl ester	DQWPFSLDHJDLRL-UHFFFAOYSA-N	InChI=1S/C6H15O4P/c1-4-8-11(7,9-5-2)10-6-3/h4-6H2,1-3H3	CCOP(=O)(OCC)OCC	C6 H15 O4 P	182.071			Antioxidant, Colorant, Crosslinking Agent, Filler, Flame Retardant, Intermediates, Other Processing Aids, Plasticizer	Other - Bioplastic, Other - Rubber, PET, PUR, PVC	Building & Construction, Electrical and Electronic Equipment, Food-contact plastics, Packaging	1	14	Canada, China, EU, Japan, Malaysia, Nordic Countries, OECD, Philippines, South Korea, Taiwan, Thailand, Turkey, United States, Vietnam	100000	100	10000	1000	110000		1					1	1	0.5	0.5	0	0	0		1	2	1	high	0		USA Food Contact Materials Positive List (GRAS), Japan Food Contact Materials Postiive List	1	0	1	1
495	'793-24-8	1,4-Benzenediamine, N1-(1,3-dimethylbutyl)-N4-phenyl-	ZZMVLMVFYMGSMY-UHFFFAOYSA-N	InChI=1/C18H24N2/c1-14(2)13-15(3)19-17-9-11-18(12-10-17)20-16-7-5-4-6-8-16/h4-12,14-15,19-20H,13H2,1-3H3	CC(C)CC(C)NC1=CC=C(NC2=CC=CC=C2)C=C1	C18 H24 N2	268.194		50809-58-0, 76600-84-5	Antioxidant, Filler, Light Stabilizer, Other Processing Aids		Automotive, Food-contact plastics, Packaging	1	17	Canada, China, EU, Japan, Malaysia, Mexico, New Zealand, Nordic Countries, OECD, Philippines, Russia, South Korea, Taiwan, Thailand, Turkey, United States, Vietnam	100000	1000	100000	1000	200000		1					1	0	0	1	0.5	1	0		1	2.5	1	high	1	Korea REACH Authorisation		0	0	0	0
497	'79-74-3	1,4-Benzenediol, 2,5-bis(1,1-dimethylpropyl)-	CZNRFEXEPBITDS-UHFFFAOYSA-N	InChI=1S/C16H26O2/c1-7-15(3,4)11-9-14(18)12(10-13(11)17)16(5,6)8-2/h9-10,17-18H,7-8H2,1-6H3	CCC(C)(C)C1=CC(O)=C(C=C1O)C(C)(C)CC	C16 H26 O2	250.193		195460-39-0, 211107-60-7	Antioxidant, Light Stabilizer, Other Processing Aids	Other - Rubber	Food-contact plastics, Packaging	1	14	Canada, China, EU, Japan, Mexico, New Zealand, Nordic Countries, Philippines, Russia, South Korea, Taiwan, Thailand, United States, Vietnam	1000	0	1000		2000	0.5	0.5	0.5	0.5	0.5	0.5	0	0	0	0	0	1	0		1	1	1	high	0		USA Food Contact Materials Positive List (GRAS), Japan Food Contact Materials Postiive List	1	0	1	1
504	'85-44-9	1,3-Isobenzofurandione	LGRFSURHDFAFJT-UHFFFAOYSA-N	InChI=1S/C8H4O3/c9-7-5-3-1-2-4-6(5)8(10)11-7/h1-4H	O=C1OC(=O)C2=C1C=CC=C2	C8 H4 O3	148.016		39363-63-8	Biocide, Colorant, Crosslinking Agent, Filler, Intermediates, Lubricant, Monomer, Other Processing Aids, Plasticizer	Other - Rubber, PET, PVC	Agriculture, Automotive, Building & Construction, Electrical and Electronic Equipment, Food-contact plastics, Household items, furniture and other, Hygiene and Medical items, Packaging, Textiles, Toys	1	17	Canada, China, EU, India, Japan, Malaysia, Mexico, Nordic Countries, OECD, Philippines, Russia, South Korea, Taiwan, Thailand, Turkey, United States, Vietnam	1000000	100000	10000000	1000	11000000		1					0.5	0	0	0.5	1	0.5	1		1	2	1	high	0		EU Food Contact Materials Positive List, USA Food Contact Materials Positive List (GRAS), Japan Food Contact Materials Postiive List	1	1	1	1
514	'90-30-2	1-Naphthalenamine, N-phenyl-	XQVWYOYUZDUNRW-UHFFFAOYSA-N	InChI=1S/C16H13N/c1-2-9-14(10-3-1)17-16-12-6-8-13-7-4-5-11-15(13)16/h1-12,17H	N(C1=CC=CC=C1)C1=C2C=CC=CC2=CC=C1	C16 H13 N	219.105		219315-45-4	Antioxidant, Catalyst, Colorant, Crosslinking Agent, Filler, Light Stabilizer, Lubricant	Other - Rubber	Automotive, Food-contact plastics, Household items, furniture and other, Packaging, Textiles	1	14	Canada, China, EU, Japan, Mexico, Nordic Countries, OECD, Philippines, South Korea, Taiwan, Thailand, Turkey, United States, Vietnam	1000	10	10000	1000	11000	0.5	0.5	0.5	0.5	0.5	0.5	0	0	0	0	0.5	1	0		1	1.5	1	high	0		USA Food Contact Materials Positive List (GRAS)	1	0	1	0
519	'95-31-8	2-Benzothiazolesulfenamide, N-(1,1-dimethylethyl)-	IUJLOAKJZQBENM-UHFFFAOYSA-N	InChI=1S/C11H14N2S2/c1-11(2,3)13-15-10-12-8-6-4-5-7-9(8)14-10/h4-7,13H,1-3H3	CC(C)(C)NSC1=NC2=C(S1)C=CC=C2	C11 H14 N2 S2	238.06		40860-78-4, 172451-95-5, 179095-45-5, 1234495-49-8	Antioxidant, Catalyst, Crosslinking Agent, Filler, Initiator, Other Processing Aids	Other - Rubber	Automotive, Food-contact plastics, Packaging	1	17	Canada, China, EU, Japan, Malaysia, Mexico, New Zealand, Nordic Countries, OECD, Philippines, Russia, South Korea, Taiwan, Thailand, Turkey, United States, Vietnam	100000	10	100000	1000	200000		1					0	0	0	0	0.5	1	0		1	1.5	1	high	0		USA Food Contact Materials Positive List (GRAS)	1	0	1	0
520	'95-33-0	2-Benzothiazolesulfenamide, N-cyclohexyl-	DEQZTKGFXNUBJL-UHFFFAOYSA-N	InChI=1S/C13H16N2S2/c1-2-6-10(7-3-1)15-17-13-14-11-8-4-5-9-12(11)16-13/h4-5,8-10,15H,1-3,6-7H2	C1CCC(CC1)NSC1=NC2=C(S1)C=CC=C2	C13 H16 N2 S2	264.075		51540-81-9, 75301-39-2, 108251-59-8, 156014-54-9, 929698-33-9	Catalyst, Colorant, Crosslinking Agent, Initiator, Other Processing Aids	Other - Rubber	Automotive, Food-contact plastics, Packaging	1	15	Canada, China, EU, Japan, Malaysia, Mexico, Nordic Countries, OECD, Philippines, South Korea, Taiwan, Thailand, Turkey, United States, Vietnam	100000	100	100000	1000	200000		1					1	0	0	1	0.5	1	0		1	2.5	1	high	0		USA Food Contact Materials Positive List (GRAS)	1	0	1	0
521	'96-45-7	2-Imidazolidinethione	PDQAZBWRQCGBEV-UHFFFAOYSA-N	InChI=1S/C3H6N2S/c6-3-4-1-2-5-3/h1-2H2,(H2,4,5,6)	S=C1NCCN1	C3 H6 N2 S	102.025		96-46-8, 12261-94-8, 26856-29-1, 71836-04-9, 90613-75-5, 875479-38-2, 1342300-13-3	Catalyst, Crosslinking Agent, Initiator, Light Stabilizer, Other Processing Aids	HDPE, LDPE, Other - Rubber	Building & Construction, Electrical and Electronic Equipment, Food-contact plastics, Packaging, Textiles	1	14	Canada, China, EU, Japan, Malaysia, Mexico, Nordic Countries, Philippines, South Korea, Taiwan, Thailand, Turkey, United States, Vietnam	10000	10	1000		11000		1					1	0.5	0	1	1	0.5	0		1	3	1	high	1	EU REACH SVHC, USA - California Proposition 65, Korea REACH Authorisation	USA Food Contact Materials Positive List (GRAS)	1	0	1	0
522	'96-69-5	Phenol, 4,4'-thiobis[2-(1,1-dimethylethyl)-5-methyl-	HXIQYSLFEXIOAV-UHFFFAOYSA-N	InChI=1S/C22H30O2S/c1-13-9-17(23)15(21(3,4)5)11-19(13)25-20-12-16(22(6,7)8)18(24)10-14(20)2/h9-12,23-24H,1-8H3	CC1=CC(O)=C(C=C1SC1=C(C)C=C(O)C(=C1)C(C)(C)C)C(C)(C)C	C22 H30 O2 S	358.197		12671-70-4, 52012-53-0, 60318-32-3, 76996-60-6, 126340-60-1, 188253-47-6, 381726-02-9, 914648-51-4	Antioxidant, Catalyst, Filler, Initiator, Light Stabilizer, Other Processing Aids	ABS, HDPE, LDPE, Other - Rubber, PET, PP, PS, PUR, PVC	Agriculture, Automotive, Building & Construction, Electrical and Electronic Equipment, Food-contact plastics, Packaging, Toys	1	13	Canada, China, EU, Japan, Mexico, Nordic Countries, Philippines, South Korea, Taiwan, Thailand, Turkey, United States, Vietnam	10000	1000	1000		11000	0.5	0.5	0.5	0.5	0.5	0.5	0.5	0	0	0.5	0.5	1	0	0.5	1	2.5	1	high	0		EU Food Contact Materials Positive List, USA Food Contact Materials Positive List (GRAS), Japan Food Contact Materials Postiive List	1	1	1	1
523	'97-39-2	Guanidine, N,N'-bis(2-methylphenyl)-	OPNUROKCUBTKLF-UHFFFAOYSA-N	InChI=1S/C15H17N3/c1-11-7-3-5-9-13(11)17-15(16)18-14-10-6-4-8-12(14)2/h3-10H,1-2H3,(H3,16,17,18)	CC1=CC=CC=C1NC(=N)NC1=C(C)C=CC=C1	C15 H17 N3	239.142		46913-50-2, 60297-72-5, 132116-33-7	Crosslinking Agent	Other - Rubber	Automotive, Food-contact plastics, Packaging	1	13	Canada, China, EU, Japan, New Zealand, Nordic Countries, Philippines, Russia, South Korea, Taiwan, Thailand, Turkey, United States	1000	10	1000		2000		1					1	1	0	0.5	0.5	1	0		1	3	1	high	0		USA Food Contact Materials Positive List (GRAS)	1	0	1	0
526	'41556-26-7	Decanedioic acid, 1,10-bis(1,2,2,6,6-pentamethyl-4-piperidinyl) ester	RSOILICUEWXSLA-UHFFFAOYSA-N	InChI=1S/C30H56N2O4/c1-27(2)19-23(20-28(3,4)31(27)9)35-25(33)17-15-13-11-12-14-16-18-26(34)36-24-21-29(5,6)32(10)30(7,8)22-24/h23-24H,11-22H2,1-10H3	CN1C(C)(C)CC(CC1(C)C)OC(=O)CCCCCCCCC(=O)OC1CC(C)(C)N(C)C(C)(C)C1	C30 H56 N2 O4	508.424		83931-72-0, 93793-67-0, 95078-95-8, 95918-48-2, 134868-70-5, 1396894-14-6, 1461634-18-3	Antioxidant, Colorant, Filler, Light Stabilizer, Monomer, Other Processing Aids	ABS, HDPE, LDPE, Other - Rubber, Other - Thermoplastic, PA, PC, PET, PP, PS, PUR, PVC	Agriculture, Automotive, Building & Construction, Electrical and Electronic Equipment, Household items, furniture and other, Packaging, Textiles	0	15	Canada, China, EU, Japan, Mexico, New Zealand, Nordic Countries, OECD, Philippines, South Korea, Taiwan, Thailand, Turkey, United States, Vietnam		100	10000	1000	10100		1					0	0	0	0	0	1	0		1	1	1	high	0		Japan Food Contact Materials Postiive List	1	0	0	1
527	'82919-37-7	Decanedioic acid, 1-methyl 10-(1,2,2,6,6-pentamethyl-4-piperidinyl) ester	OTCWVYFQGYOYJO-UHFFFAOYSA-N	InChI=1S/C21H39NO4/c1-20(2)15-17(16-21(3,4)22(20)5)26-19(24)14-12-10-8-7-9-11-13-18(23)25-6/h17H,7-16H2,1-6H3	COC(=O)CCCCCCCCC(=O)OC1CC(C)(C)N(C)C(C)(C)C1	C21 H39 N O4	369.288		947529-87-5	Antioxidant, Light Stabilizer	HDPE, LDPE, Other - Thermoplastic, PET, PP, PUR, PVC	Agriculture, Automotive, Building & Construction, Electrical and Electronic Equipment, Household items, furniture and other, Packaging, Textiles	0	14	Canada, China, EU, Japan, Malaysia, New Zealand, Nordic Countries, Philippines, South Korea, Taiwan, Thailand, Turkey, United States, Vietnam		100	1000		1100		1					0	0	0	0	0	1	0		1	1	1	high	0		Japan Food Contact Materials Postiive List	1	0	0	1
531	'100-21-0	1,4-Benzenedicarboxylic acid	KKEYFWRCBNTPAC-UHFFFAOYSA-N	InChI=1S/C8H6O4/c9-7(10)5-1-2-6(4-3-5)8(11)12/h1-4H,(H,9,10)(H,11,12)	OC(=O)C1=CC=C(C=C1)C(O)=O	C8 H6 O4	166.027		211863-90-0, 211863-92-2, 2088100-81-4	Colorant, Filler, Intermediates, Lubricant, Monomer, Other Processing Aids, Plasticizer	Other - Rubber, Other - Thermoplastic, PA, PET	Automotive, Food-contact plastics, Packaging, Textiles	1	16	Canada, China, EU, Japan, Malaysia, Mexico, Nordic Countries, OECD, Philippines, Russia, South Korea, Taiwan, Thailand, Turkey, United States, Vietnam	10000000	1000	10000000	1000	20000000		1					0.5	0	0	0.5	1	0	0	0	1	1.5	1	high	0		EU Food Contact Materials Positive List, USA Food Contact Materials Positive List (GRAS), Japan Food Contact Materials Postiive List	1	1	1	1
535	'100-41-4	Benzene, ethyl-	YNQLUTRBYVCPMQ-UHFFFAOYSA-N	InChI=1S/C8H10/c1-2-8-6-4-3-5-7-8/h3-7H,2H2,1H3	CCC1=CC=CC=C1	C8 H10	106.078			Catalyst, Colorant, Crosslinking Agent, Filler, Intermediates, Lubricant, Odor Agent, Other Processing Aids	ABS, HDPE, HIPS, LDPE, Other - Bioplastic, Other - Rubber, PS	Agriculture, Automotive, Building & Construction, Electrical and Electronic Equipment, Food-contact plastics, Household items, furniture and other, Hygiene and Medical items, Packaging, Textiles, Toys	1	16	Canada, China, EU, Japan, Malaysia, Mexico, Nordic Countries, OECD, Philippines, Russia, South Korea, Taiwan, Thailand, Turkey, United States, Vietnam	10000000	10000	10000000	1000	20000000		1					1	1	1	1	0.5	1	0		1	4.5	1	high	1	USA - California Proposition 65	Japan Food Contact Materials Postiive List	1	0	0	1
536	'10043-11-5	Boron nitride (BN)	PZNSFCLAULLKQX-UHFFFAOYSA-N	InChI=1S/BN/c1-2	B#N	B N	25.0124		54824-38-3, 56939-87-8, 58799-13-6, 60569-72-4, 69071-29-0, 69495-08-5, 78666-05-4, 165390-92-1, 1361021-23-9, 1361021-37-5	Biocide, Colorant, Filler, Intermediates, Lubricant, Other Processing Aids		Automotive, Building & Construction, Electrical and Electronic Equipment, Food-contact plastics, Hygiene and Medical items, Packaging	1	15	Canada, China, EU, Japan, Mexico, New Zealand, Nordic Countries, OECD, Philippines, Russia, South Korea, Taiwan, Thailand, United States, Vietnam	1000	100	10000	1000	11000		1					1	0	0	1	0	0	0		1	1	1	high	1	EU Toys directive	EU Food Contact Materials Positive List, Japan Food Contact Materials Postiive List	1	1	0	1
538	'100-52-7	Benzaldehyde	HUMNYLRZRPPJDN-UHFFFAOYSA-N	InChI=1S/C7H6O/c8-6-7-4-2-1-3-5-7/h1-6H	O=CC1=CC=CC=C1	C7 H6 O	106.042			Colorant, Filler, Intermediates, Lubricant, Odor Agent, Other Processing Aids, Plasticizer	Other - Rubber, PVC	Automotive, Building & Construction, Electrical and Electronic Equipment, Food-contact plastics, Household items, furniture and other, Packaging, Textiles, Toys	1	14	Canada, China, EU, Japan, Mexico, Nordic Countries, OECD, Philippines, South Korea, Taiwan, Thailand, Turkey, United States, Vietnam	100000	10	100000	1000	200000		1					0	0	0	0	1	0.5	0		1	1.5	1	high	0		EU Food Contact Materials Positive List, USA Food Contact Materials Positive List (GRAS), Japan Food Contact Materials Postiive List	1	1	1	1
542	'100-97-0	1,3,5,7-Tetraazatricyclo[3.3.1.13,7]decane	VKYKSIONXSXAKP-UHFFFAOYSA-N	InChI=1S/C6H12N4/c1-7-2-9-4-8(1)5-10(3-7)6-9/h1-6H2	C1N2CN3CN1CN(C2)C3	C6 H12 N4	140.106		11103-67-6, 15978-33-3, 56549-34-9, 74734-16-0, 91773-48-7, 187285-07-0, 1556839-80-5	Colorant, Crosslinking Agent, Filler, Intermediates, Monomer, Other Processing Aids		Agriculture, Automotive, Building & Construction, Electrical and Electronic Equipment, Food-contact plastics, Household items, furniture and other, Packaging, Textiles, Toys	1	17	Canada, China, EU, India, Japan, Malaysia, Mexico, Nordic Countries, OECD, Philippines, Russia, South Korea, Taiwan, Thailand, Turkey, United States, Vietnam	100000	1000	100000	1000	200000		1					0.5	0	0	0.5	1	0	1		1	1.5	1	high	0		EU Food Contact Materials Positive List, USA Food Contact Materials Positive List (GRAS), Japan Food Contact Materials Postiive List	1	1	1	1
545	'101-84-8	Benzene, 1,1'-oxybis-	USIUVYZYUHIAEV-UHFFFAOYSA-N	InChI=1S/C12H10O/c1-3-7-11(8-4-1)13-12-9-5-2-6-10-12/h1-10H	O(C1=CC=CC=C1)C1=CC=CC=C1	C12 H10 O	170.073			Biocide, Colorant, Intermediates, Odor Agent	LDPE, Other - Rubber, PET	Automotive, Building & Construction, Textiles, Toys	0	16	Canada, China, EU, Japan, Malaysia, Mexico, Nordic Countries, OECD, Philippines, Russia, South Korea, Taiwan, Thailand, Turkey, United States, Vietnam	10000	10	100000	1000	110000		1					0	0	0	0	0	1	0		1	1	1	high	0		USA Food Contact Materials Positive List (GRAS)	1	0	1	0
547	'1025-15-6	1,3,5-Triazine-2,4,6(1H,3H,5H)-trione, 1,3,5-tri-2-propen-1-yl-	KOMNUTZXSVSERR-UHFFFAOYSA-N	InChI=1S/C12H15N3O3/c1-4-7-13-10(16)14(8-5-2)12(18)15(9-6-3)11(13)17/h4-6H,1-3,7-9H2	C=CCN1C(=O)N(CC=C)C(=O)N(CC=C)C1=O	C12 H15 N3 O3	249.111		109521-50-8, 123339-46-8, 196519-94-5, 1086264-29-0	Colorant, Crosslinking Agent, Intermediates	Other - Thermoplastic	Electrical and Electronic Equipment, Food-contact plastics, Packaging	1	14	Canada, China, EU, Japan, Malaysia, Mexico, Nordic Countries, Philippines, Russia, South Korea, Taiwan, Thailand, United States, Vietnam	1000	10	1000		2000		1					0	0	0	0	1	0	0		1	1	1	high	0		Japan Food Contact Materials Postiive List	1	0	0	1
550	'103-34-4	Morpholine, 4,4'-dithiobis-	HLBZWYXLQJQBKU-UHFFFAOYSA-N	InChI=1S/C8H16N2O2S2/c1-5-11-6-2-9(1)13-14-10-3-7-12-8-4-10/h1-8H2	C1CN(CCO1)SSN1CCOCC1	C8 H16 N2 O2 S2	236.065		39393-19-6, 186983-49-3, 1081512-50-6	Crosslinking Agent, Lubricant, Plasticizer		Food-contact plastics, Packaging	1	16	Canada, China, EU, Japan, Malaysia, Mexico, New Zealand, Nordic Countries, OECD, Philippines, South Korea, Taiwan, Thailand, Turkey, United States, Vietnam	1000	10	10000	1000	11000		1					0	0	0	0	0	1	0		1	1	1	high	0		USA Food Contact Materials Positive List (GRAS)	1	0	1	0
564	'10584-98-2	8-Oxa-3,5-dithia-4-stannatetradecanoic acid, 4,4-dibutyl-10-ethyl-7-oxo-, 2-ethylhexyl ester	PRIUALOJYOZZOJ-UHFFFAOYSA-L	InChI=1/2C10H20O2S.2C4H9.Sn/c2*1-3-5-6-9(4-2)7-12-10(11)8-13;2*1-3-4-2;/h2*9,13H,3-8H2,1-2H3;2*1,3-4H2,2H3;/q;;;;+2/p-2	CCCCC(CC)COC(=O)CS[Sn](CCCC)(CCCC)SCC(=O)OCC(CC)CCCC	C28 H56 O4 S2 Sn	640.264		52683-17-7, 202875-90-9	Filler, Heat Stabilizer, Light Stabilizer, Other Processing Aids		Automotive, Building & Construction, Packaging	0	12	Canada, China, EU, Japan, New Zealand, Nordic Countries, OECD, Philippines, South Korea, Taiwan, United States, Vietnam	100	10	10000	1000	10100	1	0	1	0	1	0	1	0	0.5	1	1	1	0		3	5.5	1	high	1	Rotterdam Convention (EU PIC List), EU Toys directive		0	0	0	0
565	'105-95-3	1,4-Dioxacycloheptadecane-5,17-dione	XRHCAGNSDHCHFJ-UHFFFAOYSA-N	InChI=1S/C15H26O4/c16-14-10-8-6-4-2-1-3-5-7-9-11-15(17)19-13-12-18-14/h1-13H2	O=C1CCCCCCCCCCCC(=O)OCCO1	C15 H26 O4	270.183		91462-25-8	Odor Agent		Building & Construction, Electrical and Electronic Equipment, Food-contact plastics, Household items, furniture and other, Packaging, Textiles	1	15	Canada, China, EU, Japan, Mexico, New Zealand, Nordic Countries, Philippines, Russia, South Korea, Taiwan, Thailand, Turkey, United States, Vietnam	10000	10	1000		11000		1					0	0	0	0	0	1	0		1	1	1	high	0		USA Food Contact Materials Positive List (GRAS)	1	0	1	0
571	'106-97-8	Butane	IJDNQMDRQITEOD-UHFFFAOYSA-N	InChI=1S/C4H10/c1-3-4-2/h3-4H2,1-2H3	CCCC	C4 H10	58.0783			Antistatic Agent, Biocide, Blowing Agent, Colorant, Filler, Intermediates, Light Stabilizer, Lubricant, Odor Agent, Other Processing Aids	HDPE, LDPE, Other - Thermoplastic	Agriculture, Automotive, Building & Construction, Electrical and Electronic Equipment, Food-contact plastics, Household items, furniture and other, Hygiene and Medical items, Packaging, Textiles, Toys	1	15	Canada, China, EU, Japan, Malaysia, Mexico, Nordic Countries, OECD, Philippines, South Korea, Taiwan, Thailand, Turkey, United States, Vietnam	10000000	1000000	100000000	1000	110000000		1					1	1	1	0	0	0	0		1	2	1	high	0		EU Food Contact Materials Positive List, USA Food Contact Materials Positive List (GRAS), Japan Food Contact Materials Postiive List	1	1	1	1
574	'107-05-1	1-Propene, 3-chloro-	OSDWBNJEKMUWAV-UHFFFAOYSA-N	InChI=1S/C3H5Cl/c1-2-3-4/h2H,1,3H2	ClCC=C	C3 H5 Cl	76.008			Intermediates, Monomer			0	14	Canada, China, EU, Japan, Malaysia, Mexico, Nordic Countries, OECD, Philippines, South Korea, Taiwan, Turkey, United States, Vietnam		10000	1000000	1000	1010000		1					1	1	0.5	0.5	1	1	0		1	4	1	high	0			0	0	0	0
575	'107-06-2	Ethane, 1,2-dichloro-	WSLDOOZREJYCGB-UHFFFAOYSA-N	InChI=1S/C2H4Cl2/c3-1-2-4/h1-2H2	ClCCCl	C2 H4 Cl2	97.969		52399-93-6	Intermediates, Monomer, Odor Agent, Other Processing Aids	PVC	Electrical and Electronic Equipment, Food-contact plastics, Packaging	1	16	Canada, China, EU, India, Japan, Mexico, Nordic Countries, OECD, Philippines, Russia, South Korea, Taiwan, Thailand, Turkey, United States, Vietnam	10000000	10000	100000000	1000	110000000		1					1	1	0.5	0	1	0.5	0		1	3	1	high	1	Rotterdam Convention, Rotterdam Convention (EU PIC List), EU REACH Authorisation, EU REACH SVHC, USA - California Proposition 65, Korea REACH Authorisation	USA Food Contact Materials Positive List (GRAS), Japan Food Contact Materials Postiive List	1	0	1	1
576	'107-15-3	1,2-Ethanediamine	PIICEJLVQHRZGT-UHFFFAOYSA-N	InChI=1S/C2H8N2/c3-1-2-4/h1-4H2	NCCN	C2 H8 N2	60.0687		8030-24-8, 85404-18-8	Catalyst, Colorant, Crosslinking Agent, Filler, Initiator, Intermediates, Lubricant, Monomer, Other Processing Aids, Plasticizer		Agriculture, Automotive, Building & Construction, Electrical and Electronic Equipment, Food-contact plastics, Household items, furniture and other, Packaging, Textiles	1	16	Canada, China, EU, India, Japan, Malaysia, Mexico, Nordic Countries, OECD, Philippines, South Korea, Taiwan, Thailand, Turkey, United States, Vietnam	10000	10000	1000000	1000	1010000		1					1	0	0	1	0.5	0.5	1		1	2	1	high	1	EU REACH SVHC	EU Food Contact Materials Positive List, USA Food Contact Materials Positive List (GRAS), Japan Food Contact Materials Postiive List	1	1	1	1
577	'107-21-1	1,2-Ethanediol	LYCAIKOWRPUZTN-UHFFFAOYSA-N	InChI=1S/C2H6O2/c3-1-2-4/h3-4H,1-2H2	OCCO	C2 H6 O2	62.0368		37221-95-7, 71767-64-1, 1371582-33-0, 2088100-90-5	Antistatic Agent, Biocide, Blowing Agent, Catalyst, Colorant, Crosslinking Agent, Filler, Intermediates, Light Stabilizer, Lubricant, Monomer, Odor Agent, Other Processing Aids, Plasticizer, Solvent	Other - Rubber, PET, PUR	Agriculture, Automotive, Building & Construction, Electrical and Electronic Equipment, Food-contact plastics, Household items, furniture and other, Packaging, Textiles, Toys	1	14	Canada, China, EU, Japan, Malaysia, Mexico, OECD, Philippines, South Korea, Taiwan, Thailand, Turkey, United States, Vietnam	10000000	100000	10000000	1000	20000000		1					1	0	1	1	1	0	0		1	3	1	high	1	USA - California Proposition 65	EU Food Contact Materials Positive List, USA Food Contact Materials Positive List (GRAS), Japan Food Contact Materials Postiive List	1	1	1	1
578	'107-22-2	Ethanedial	LEQAOMBKQFMDFZ-UHFFFAOYSA-N	InChI=1S/C2H2O2/c3-1-2-4/h1-2H	O=CC=O	C2 H2 O2	58.0055		83513-30-8	Biocide, Colorant, Crosslinking Agent, Filler, Intermediates, Odor Agent, Other Processing Aids	Other - Thermoplastic, PA, PET	Building & Construction, Electrical and Electronic Equipment, Food-contact plastics, Household items, furniture and other, Packaging, Textiles	1	15	Canada, China, EU, Mexico, New Zealand, Nordic Countries, OECD, Philippines, Russia, South Korea, Taiwan, Thailand, Turkey, United States, Vietnam	100000	1000	100000	1000	200000		1					0.5	0	0.5	0	1	0.5	1		1	2	1	high	0		USA Food Contact Materials Positive List (GRAS), Japan Food Contact Materials Postiive List	1	0	1	1
581	'108-31-6	2,5-Furandione	FPYJFEHAWHCUMM-UHFFFAOYSA-N	InChI=1S/C4H2O3/c5-3-1-2-4(6)7-3/h1-2H	O=C1OC(=O)C=C1	C4 H2 O3	98.0004		184288-31-1, 1190407-73-8, 1229972-04-6, 1380217-40-2	Colorant, Crosslinking Agent, Filler, Flame Retardant, Intermediates, Lubricant, Monomer, Other Processing Aids, Plasticizer	PET	Agriculture, Automotive, Building & Construction, Electrical and Electronic Equipment, Food-contact plastics, Household items, furniture and other, Packaging, Textiles	1	17	Canada, China, EU, India, Japan, Malaysia, Mexico, Nordic Countries, OECD, Philippines, Russia, South Korea, Taiwan, Thailand, Turkey, United States, Vietnam	1000000	10000	1000000	1000	2000000		1					0	0	0	0	1	0.5	1		1	1.5	1	high	0		EU Food Contact Materials Positive List, USA Food Contact Materials Positive List (GRAS), Japan Food Contact Materials Postiive List	1	1	1	1
585	'108-46-3	1,3-Benzenediol	GHMLBKRAJCXXBS-UHFFFAOYSA-N	InChI=1S/C6H6O2/c7-5-2-1-3-6(8)4-5/h1-4,7-8H	OC1=CC(O)=CC=C1	C6 H6 O2	110.037			Catalyst, Colorant, Crosslinking Agent, Flame Retardant, Intermediates, Light Stabilizer, Monomer, Odor Agent, Other Processing Aids	Other - Rubber	Agriculture, Building & Construction, Electrical and Electronic Equipment, Food-contact plastics, Household items, furniture and other, Packaging, Textiles	1	16	Canada, China, EU, Japan, Malaysia, Mexico, Nordic Countries, OECD, Philippines, Russia, South Korea, Taiwan, Thailand, Turkey, United States, Vietnam	10000	10000	100000	1000	110000		1					0	0	0	0	1	1	0	0.5	1	2.5	1	high	0		EU Food Contact Materials Positive List, USA Food Contact Materials Positive List (GRAS), Japan Food Contact Materials Postiive List	1	1	1	1
586	'108-65-6	2-Propanol, 1-methoxy-, 2-acetate	LLHKCFNBLRBOGN-UHFFFAOYSA-N	InChI=1/C6H12O3/c1-5(4-8-3)9-6(2)7/h5H,4H2,1-3H3	COCC(C)OC(C)=O	C6 H12 O3	132.079		142300-82-1	Catalyst, Colorant, Crosslinking Agent, Filler, Intermediates, Light Stabilizer, Lubricant, Odor Agent, Other Processing Aids, Plasticizer		Agriculture, Automotive, Building & Construction, Electrical and Electronic Equipment, Household items, furniture and other, Hygiene and Medical items, Packaging, Textiles, Toys	0	16	Canada, China, EU, Japan, Malaysia, Mexico, Nordic Countries, OECD, Philippines, Russia, South Korea, Taiwan, Thailand, Turkey, United States, Vietnam	100000	10000	100000	1000	200000		1					1	0	0	1	0.5	0	0		1	1.5	1	high	0		Japan Food Contact Materials Postiive List	1	0	0	1
587	'108-77-0	1,3,5-Triazine, 2,4,6-trichloro-	MGNCLNQXLYJVJD-UHFFFAOYSA-N	InChI=1S/C3Cl3N3/c4-1-7-2(5)9-3(6)8-1	ClC1=NC(Cl)=NC(Cl)=N1	C3 Cl3 N3	182.916		190086-22-7	Antioxidant, Colorant, Other Processing Aids		Automotive, Electrical and Electronic Equipment	0	16	Canada, China, EU, Japan, Mexico, New Zealand, Nordic Countries, OECD, Philippines, Russia, South Korea, Taiwan, Thailand, Turkey, United States, Vietnam	100000	0	1000000	1000	1100000	0	0	0	0	0	0	0.5	0	0	0.5	1	0	1		1	1.5	1	high	0			0	0	0	0
588	'108-78-1	1,3,5-Triazine-2,4,6-triamine	JDSHMPZPIAZGSV-UHFFFAOYSA-N	InChI=1S/C3H6N6/c4-1-7-2(5)9-3(6)8-1/h(H6,4,5,6,7,8,9)	NC1=NC(N)=NC(N)=N1	C3 H6 N6	126.065		504-18-7, 65544-34-5, 67757-43-1, 68379-55-5, 70371-19-6, 94977-27-2, 130392-03-9, 169314-62-9, 1228929-27-8, 1399841-69-0, 1399841-71-4, 1399841-73-6	Colorant, Filler, Flame Retardant, Intermediates, Light Stabilizer, Monomer, Other Processing Aids, Plasticizer	HDPE, LDPE, Other - Thermoplastic, PA, PET, PP, PUR	Automotive, Building & Construction, Electrical and Electronic Equipment, Food-contact plastics, Household items, furniture and other, Packaging, Textiles, Toys	1	17	Canada, China, EU, Japan, Malaysia, Mexico, New Zealand, Nordic Countries, OECD, Philippines, Russia, South Korea, Taiwan, Thailand, Turkey, United States, Vietnam	1000000	10000	1000000	1000	2000000		1					0.5	0.5	0	0	0.5	1	0		1	2	1	high	0		EU Food Contact Materials Positive List, USA Food Contact Materials Positive List (GRAS), Japan Food Contact Materials Postiive List	1	1	1	1
589	'108-88-3	Benzene, methyl-	YXFVVABEGXRONW-UHFFFAOYSA-N	InChI=1S/C7H8/c1-7-5-3-2-4-6-7/h2-6H,1H3	CC1=CC=CC=C1	C7 H8	92.0626		1053657-77-4, 1202864-97-8	Antioxidant, Biocide, Catalyst, Colorant, Crosslinking Agent, Filler, Intermediates, Light Stabilizer, Lubricant, Odor Agent, Other Processing Aids, Plasticizer, Solvent	ABS, HDPE, HIPS, LDPE, Other - Bioplastic, Other - Thermoplastic, PS, PUR	Agriculture, Automotive, Building & Construction, Electrical and Electronic Equipment, Food-contact plastics, Household items, furniture and other, Hygiene and Medical items, Packaging, Textiles, Toys	1	17	Canada, China, EU, India, Japan, Malaysia, Mexico, Nordic Countries, OECD, Philippines, Russia, South Korea, Taiwan, Thailand, Turkey, United States, Vietnam	10000000	100000	10000000	1000	20000000		1					1	0	0	1	1	0.5	0		1	2.5	1	high	1	EU REACH Restriction, USA - California Proposition 65, Korea REACH Authorisation	USA Food Contact Materials Positive List (GRAS), Japan Food Contact Materials Postiive List	1	0	1	1
593	'109-99-9	Furan, tetrahydro-	WYURNTSHIVDZCO-UHFFFAOYSA-N	InChI=1S/C4H8O/c1-2-4-5-3-1/h1-4H2	C1CCOC1	C4 H8 O	72.0575		77392-70-2	Catalyst, Colorant, Filler, Intermediates, Lubricant, Monomer, Other Processing Aids, Plasticizer, Solvent	PUR, PVC	Agriculture, Automotive, Building & Construction, Electrical and Electronic Equipment, Food-contact plastics, Household items, furniture and other, Hygiene and Medical items, Packaging, Textiles, Toys	1	16	Canada, China, EU, India, Japan, Malaysia, Mexico, Nordic Countries, OECD, Philippines, South Korea, Taiwan, Thailand, Turkey, United States, Vietnam	100000	1000	1000000	1000	1100000		1					0.5	0.5	0	0.5	1	0	0		1	2	1	high	0		EU Food Contact Materials Positive List, USA Food Contact Materials Positive List (GRAS), Japan Food Contact Materials Postiive List	1	1	1	1
602	'110-85-0	Piperazine	GLUUGHFHXGJENI-UHFFFAOYSA-N	InChI=1S/C4H10N2/c1-2-6-4-3-5-1/h5-6H,1-4H2	C1CNCCN1	C4 H10 N2	86.0844		8017-90-1, 8027-81-4, 81546-15-8, 854880-15-2, 861800-35-3	Colorant, Intermediates, Other Processing Aids	PA		0	15	Canada, China, EU, Japan, Mexico, New Zealand, Nordic Countries, OECD, Philippines, Russia, South Korea, Taiwan, Thailand, United States, Vietnam	1000	100	100000	1000	101000		1					0.5	0	0	0.5	1	0.5	1		1	2	1	high	0		USA Food Contact Materials Positive List (GRAS), Japan Food Contact Materials Postiive List	1	0	1	1
603	'110-88-3	1,3,5-Trioxane	BGJSXRVXTHVRSN-UHFFFAOYSA-N	InChI=1S/C3H6O3/c1-4-2-6-3-5-1/h1-3H2	C1OCOCO1	C3 H6 O3	90.0317		113783-48-5	Intermediates, Monomer	Other - Thermoplastic	Building & Construction, Food-contact plastics, Packaging	1	14	Canada, China, EU, Japan, Nordic Countries, OECD, Philippines, Russia, South Korea, Taiwan, Thailand, Turkey, United States, Vietnam	1000000	10	-1	1000	1000000		1					1	0	0	1	1	0	0		1	2	1	high	0		EU Food Contact Materials Positive List, USA Food Contact Materials Positive List (GRAS), Japan Food Contact Materials Postiive List	1	1	1	1
608	'111-46-6	Ethanol, 2,2'-oxybis-	MTHSVFCYNBDYFN-UHFFFAOYSA-N	InChI=1S/C4H10O3/c5-1-3-7-4-2-6/h5-6H,1-4H2	OCCOCCO	C4 H10 O3	106.063		4669-26-5, 2126734-27-6	Biocide, Catalyst, Colorant, Crosslinking Agent, Filler, Initiator, Intermediates, Light Stabilizer, Lubricant, Monomer, Odor Agent, Other Processing Aids, Plasticizer	HDPE, LDPE, Other - Thermoplastic, PA, PET, PP	Agriculture, Automotive, Building & Construction, Electrical and Electronic Equipment, Food-contact plastics, Household items, furniture and other, Hygiene and Medical items, Packaging, Textiles, Toys	1	16	Canada, China, EU, India, Malaysia, Mexico, Nordic Countries, OECD, Philippines, Russia, South Korea, Taiwan, Thailand, Turkey, United States, Vietnam	1000000	10000	1000000	1000	2000000		1					0.5	0	0	0.5	1	0	0		1	1.5	1	high	0		EU Food Contact Materials Positive List, USA Food Contact Materials Positive List (GRAS), Japan Food Contact Materials Postiive List	1	1	1	1
610	'111-66-0	1-Octene	KWKAKUADMBZCLK-UHFFFAOYSA-N	InChI=1S/C8H16/c1-3-5-7-8-6-4-2/h3H,1,4-8H2,2H3	CCCCCCC=C	C8 H16	112.125			Crosslinking Agent, Filler, Intermediates, Lubricant, Monomer, Other Processing Aids	HDPE, LDPE	Automotive, Building & Construction, Electrical and Electronic Equipment, Food-contact plastics, Household items, furniture and other, Packaging, Textiles	1	15	Canada, China, EU, Japan, Mexico, Nordic Countries, OECD, Philippines, Russia, South Korea, Taiwan, Thailand, Turkey, United States, Vietnam	1000000	10	1000000	1000	2000000		1					0	0	0	0	0	1	0		1	1	1	high	0		EU Food Contact Materials Positive List, USA Food Contact Materials Positive List (GRAS), Japan Food Contact Materials Postiive List	1	1	1	1
611	'1118-46-3	Stannane, butyltrichloro-	YMLFYGFCXGNERH-UHFFFAOYSA-K	InChI=1S/C4H9.3ClH.Sn/c1-3-4-2;;;;/h1,3-4H2,2H3;3*1H;/q;;;;+3/p-3	CCCC[Sn](Cl)(Cl)Cl	C4 H9 Cl3 Sn	281.879			Catalyst, Crosslinking Agent, Heat Stabilizer, Initiator, Light Stabilizer, Other Processing Aids	PVC		0	16	Canada, China, EU, Japan, Mexico, New Zealand, Nordic Countries, OECD, Philippines, Russia, South Korea, Taiwan, Thailand, Turkey, United States, Vietnam	10000	0	100000	1000	110000		1					1	0	0.5	1	1	1	0		1	3.5	1	high	1	EU Toys directive		0	0	0	0
613	'111-88-6	1-Octanethiol	KZCOBXFFBQJQHH-UHFFFAOYSA-N	InChI=1S/C8H18S/c1-2-3-4-5-6-7-8-9/h9H,2-8H2,1H3	CCCCCCCCS	C8 H18 S	146.113			Intermediates, Other Processing Aids			0	13	Canada, China, EU, Mexico, Nordic Countries, OECD, Philippines, Russia, South Korea, Taiwan, Thailand, United States, Vietnam	10	0	-1	1000	1000		1					0	0	0	0	0.5	1	0		1	1.5	1	high	0		Japan Food Contact Materials Postiive List	1	0	0	1
615	'112-00-5	1-Dodecanaminium, N,N,N-trimethyl-, chloride (1:1)	DDXLVDQZPFLQMZ-UHFFFAOYSA-M	InChI=1S/C15H34N.ClH/c1-5-6-7-8-9-10-11-12-13-14-15-16(2,3)4;/h5-15H2,1-4H3;1H/q+1;/p-1	[Cl-].CCCCCCCCCCCC[N+](C)(C)C	C15 H34 N . Cl	263.238		37293-08-6, 37380-56-6, 59680-23-8, 62395-69-1, 71061-07-9, 108779-79-9, 769136-50-7, 1392044-09-5	Antistatic Agent	PVC	Electrical and Electronic Equipment, Textiles	0	11	Canada, China, EU, Nordic Countries, OECD, Philippines, South Korea, Taiwan, Thailand, United States, Vietnam	100	10	10000	1000	10100		1					0	0	0	0	0	1	0		1	1	1	high	0			0	0	0	0
619	'112-53-8	1-Dodecanol	LQZZUXJYWNFBMV-UHFFFAOYSA-N	InChI=1S/C12H26O/c1-2-3-4-5-6-7-8-9-10-11-12-13/h13H,2-12H2,1H3	CCCCCCCCCCCCO	C12 H26 O	186.198		1322-35-6, 8014-32-2, 8032-08-4, 8032-09-5, 8032-10-8, 68855-55-0, 1173838-88-4	Biocide, Colorant, Filler, Flame Retardant, Intermediates, Lubricant, Odor Agent, Other Processing Aids, Plasticizer		Agriculture, Automotive, Building & Construction, Electrical and Electronic Equipment, Food-contact plastics, Household items, furniture and other, Packaging, Textiles, Toys	1	15	Canada, China, EU, Japan, Malaysia, Mexico, Nordic Countries, OECD, Philippines, South Korea, Taiwan, Thailand, Turkey, United States, Vietnam	1000000	100	100000	1000	1100000		1					0	0	0	0	0	1	0		1	1	1	high	0		USA Food Contact Materials Positive List (GRAS), Japan Food Contact Materials Postiive List	1	0	1	1
620	'112-55-0	1-Dodecanethiol	WNAHIZMDSQCWRP-UHFFFAOYSA-N	InChI=1S/C12H26S/c1-2-3-4-5-6-7-8-9-10-11-12-13/h13H,2-12H2,1H3	CCCCCCCCCCCCS	C12 H26 S	202.176		859759-62-9, 2022216-73-3	Intermediates, Other Processing Aids		Building & Construction, Food-contact plastics, Household items, furniture and other, Packaging, Textiles	1	15	Canada, China, EU, Malaysia, Mexico, Nordic Countries, OECD, Philippines, Russia, South Korea, Taiwan, Thailand, Turkey, United States, Vietnam	100	10	100000	1000	100100		1					0	0	0	0	1	1	1		1	2	1	high	0		USA Food Contact Materials Positive List (GRAS), Japan Food Contact Materials Postiive List	1	0	1	1
621	'112-72-1	1-Tetradecanol	HLZKNKRTKFSKGZ-UHFFFAOYSA-N	InChI=1S/C14H30O/c1-2-3-4-5-6-7-8-9-10-11-12-13-14-15/h15H,2-14H2,1H3	CCCCCCCCCCCCCCO	C14 H30 O	214.23		8032-14-2, 150138-88-8	Biocide, Colorant, Filler, Intermediates, Lubricant, Odor Agent, Other Processing Aids, Plasticizer		Electrical and Electronic Equipment, Food-contact plastics, Packaging, Textiles, Toys	1	17	Canada, China, EU, Japan, Malaysia, Mexico, New Zealand, Nordic Countries, OECD, Philippines, Russia, South Korea, Taiwan, Thailand, Turkey, United States, Vietnam	1000000	100	100000	1000	1100000		1					0	0	0	0	0	1	0		1	1	1	high	0		USA Food Contact Materials Positive List (GRAS), Japan Food Contact Materials Postiive List	1	0	1	1
625	'115-27-5	4,7-Methanoisobenzofuran-1,3-dione, 4,5,6,7,8,8-hexachloro-3a,4,7,7a-tetrahydro-	FLBJFXNAEMSXGL-UHFFFAOYSA-N	InChI=1/C9H2Cl6O3/c10-3-4(11)8(13)2-1(5(16)18-6(2)17)7(3,12)9(8,14)15/h1-2H	ClC1=C(Cl)C2(Cl)C3C(C(=O)OC3=O)C1(Cl)C2(Cl)Cl	C9 H2 Cl6 O3	367.814		122485-51-2	Crosslinking Agent, Flame Retardant, Monomer, Other Processing Aids	PET, PUR	Building & Construction, Electrical and Electronic Equipment, Food-contact plastics, Packaging	1	11	Canada, China, EU, Japan, Nordic Countries, OECD, Philippines, South Korea, Taiwan, United States, Vietnam	10000	10	10000	1000	20000	0.5	0.5	0.5	0.5	0.5	0.5	1	1	0	0	0.5	0	0		1	1.5	1	high	0		EU Food Contact Materials Positive List, Japan Food Contact Materials Postiive List	1	1	0	1
633	'12001-26-2	Mica-group minerals				Unspecified			53112-50-8, 56902-41-1, 65589-45-9, 66814-58-2, 66814-59-3, 68859-13-2, 69237-33-8, 71587-16-1, 361539-60-8, 639464-57-6	Colorant, Crosslinking Agent, Filler, Intermediates, Light Stabilizer, Lubricant, Other Processing Aids	HDPE, LDPE, PA, PET, PP	Agriculture, Automotive, Building & Construction, Electrical and Electronic Equipment, Food-contact plastics, Household items, furniture and other, Packaging, Textiles, Toys	1	15	Canada, China, EU, Malaysia, Mexico, Nordic Countries, OECD, Philippines, Russia, South Korea, Taiwan, Thailand, Turkey, United States, Vietnam		10000	10000	1000	20000		1					1	1	0	0	1	0	0		1	2	1	high	0		EU Food Contact Materials Positive List, USA Food Contact Materials Positive List (GRAS), Japan Food Contact Materials Postiive List	1	1	1	1
635	'12007-89-5	Ammonium boron oxide ((NH4)B5O8)				B . H4 N . O			154855-73-9, 1315338-39-6	Filler, Flame Retardant			0	10	Canada, China, EU, Japan, New Zealand, Nordic Countries, South Korea, Taiwan, United States, Vietnam	1000	0	10000		11000		1					1	0	0	1	0	0	0		1	1	1	high	1	EU Toys directive		0	0	0	0
637	'120-46-7	1,3-Propanedione, 1,3-diphenyl-	NZZIMKJIVMHWJC-UHFFFAOYSA-N	InChI=1S/C15H12O2/c16-14(12-7-3-1-4-8-12)11-15(17)13-9-5-2-6-10-13/h1-10H,11H2	O=C(CC(=O)C1=CC=CC=C1)C1=CC=CC=C1	C15 H12 O2	224.084		61346-73-4	Heat Stabilizer, Light Stabilizer, Lubricant, Other Processing Aids	PET, PVC	Building & Construction, Electrical and Electronic Equipment, Food-contact plastics, Household items, furniture and other, Hygiene and Medical items, Packaging, Textiles, Toys	1	15	Canada, China, EU, Japan, Malaysia, Mexico, New Zealand, Nordic Countries, Philippines, South Korea, Taiwan, Thailand, Turkey, United States, Vietnam	10000	10	10000		20000		1					0	0	0	0	0	1	0		1	1	1	high	0		Japan Food Contact Materials Postiive List	1	0	0	1
638	'120-51-4	Benzoic acid, phenylmethyl ester	SESFRYSPDFLNCH-UHFFFAOYSA-N	InChI=1S/C14H12O2/c15-14(13-9-5-2-6-10-13)16-11-12-7-3-1-4-8-12/h1-10H,11H2	O=C(OCC1=CC=CC=C1)C1=CC=CC=C1	C14 H12 O2	212.084			Biocide, Colorant, Intermediates, Odor Agent, Other Processing Aids, Plasticizer, Solvent	Other - Bioplastic, PET	Automotive, Building & Construction, Electrical and Electronic Equipment, Food-contact plastics, Household items, furniture and other, Packaging, Textiles, Toys	1	16	Canada, China, EU, Japan, Malaysia, Mexico, Nordic Countries, OECD, Philippines, Russia, South Korea, Taiwan, Thailand, Turkey, United States, Vietnam	10000	10	10000	1000	20000	0.5	0.5	0.5	0.5	0.5	0.5	0	0	0	0	0	1	0		1	1	1	high	1	EU Toys directive	USA Food Contact Materials Positive List (GRAS)	1	0	1	0
641	'120-61-6	1,4-Benzenedicarboxylic acid, 1,4-dimethyl ester	WOZVHXUHUFLZGK-UHFFFAOYSA-N	InChI=1S/C10H10O4/c1-13-9(11)7-3-5-8(6-4-7)10(12)14-2/h3-6H,1-2H3	COC(=O)C1=CC=C(C=C1)C(=O)OC	C10 H10 O4	194.058		63143-14-6, 202644-54-0	Colorant, Flame Retardant, Intermediates, Monomer, Other Processing Aids	Other - Rubber, Other - Thermoplastic, PET	Automotive, Food-contact plastics, Packaging, Textiles	1	17	Canada, China, EU, Japan, Malaysia, Mexico, New Zealand, Nordic Countries, OECD, Philippines, Russia, South Korea, Taiwan, Thailand, Turkey, United States, Vietnam	1000000	0	10000000	1000	11000000		1					0	0	0	0	1	0.5	0		1	1.5	1	high	0		EU Food Contact Materials Positive List, USA Food Contact Materials Positive List (GRAS), Japan Food Contact Materials Postiive List	1	1	1	1
643	'121-44-8	Ethanamine, N,N-diethyl-	ZMANZCXQSJIPKH-UHFFFAOYSA-N	InChI=1S/C6H15N/c1-4-7(5-2)6-3/h4-6H2,1-3H3	CCN(CC)CC	C6 H15 N	101.12		144514-14-7, 168277-99-4, 172227-74-6, 449752-61-8, 750564-56-8, 1200828-44-9, 1633017-83-0, 2011746-49-7	Catalyst, Colorant, Crosslinking Agent, Filler, Initiator, Intermediates, Light Stabilizer, Lubricant, Other Processing Aids	PA, PUR	Automotive, Building & Construction, Electrical and Electronic Equipment, Food-contact plastics, Household items, furniture and other, Packaging, Textiles	1	15	Canada, China, EU, Japan, Malaysia, Mexico, Nordic Countries, OECD, Philippines, South Korea, Taiwan, Thailand, Turkey, United States, Vietnam	100000	1000	100000	1000	200000	0.5	0.5	0.5	0.5	0.5	0.5	0	0	0	0	1	0.5	0		1	1.5	1	high	0		USA Food Contact Materials Positive List (GRAS), Japan Food Contact Materials Postiive List	1	0	1	1
644	'1222-05-5	Cyclopenta[g]-2-benzopyran, 1,3,4,6,7,8-hexahydro-4,6,6,7,8,8-hexamethyl-	ONKNPOPIGWHAQC-UHFFFAOYSA-N	InChI=1/C18H26O/c1-11-9-19-10-13-7-15-16(8-14(11)13)18(5,6)12(2)17(15,3)4/h7-8,11-12H,9-10H2,1-6H3	CC1C(C)(C)C2=CC3=C(C=C2C1(C)C)C(C)COC3	C18 H26 O	258.198		80450-66-4	Biocide, Colorant, Filler, Lubricant, Odor Agent, Other Processing Aids		Automotive, Building & Construction, Electrical and Electronic Equipment, Household items, furniture and other, Textiles	0	14	Canada, China, EU, Japan, Mexico, Nordic Countries, OECD, Philippines, Russia, South Korea, Taiwan, Turkey, United States, Vietnam	10000	10	10000	1000	20000	0.5	0.5	0.5	0.5	0.5	0.5	0.5	0	0	0.5	0	1	0	0.5	1	2	1	high	0			0	0	0	0
647	'122-39-4	Benzenamine, N-phenyl-	DMBHHRLKUKUOEG-UHFFFAOYSA-N	InChI=1S/C12H11N/c1-3-7-11(8-4-1)13-12-9-5-2-6-10-12/h1-10,13H	N(C1=CC=CC=C1)C1=CC=CC=C1	C12 H11 N	169.089		1135443-74-1	Antioxidant, Biocide, Colorant, Intermediates, Light Stabilizer, Lubricant, Other Processing Aids	Other - Rubber, PA	Agriculture, Automotive, Building & Construction, Electrical and Electronic Equipment, Food-contact plastics, Household items, furniture and other, Packaging, Textiles	1	15	Canada, China, EU, Japan, Mexico, Nordic Countries, OECD, Philippines, Russia, South Korea, Taiwan, Thailand, Turkey, United States, Vietnam	100	1000	100000	1000	100100		1					1	1	0	0.5	1	1	0		1	3.5	1	high	1	Rotterdam Convention (EU PIC List), EU Toys directive	USA Food Contact Materials Positive List (GRAS), Japan Food Contact Materials Postiive List	1	0	1	1
649	'122-40-7	Heptanal, 2-(phenylmethylene)-	HMKKIXGYKWDQSV-UHFFFAOYSA-N	InChI=1S/C14H18O/c1-2-3-5-10-14(12-15)11-13-8-6-4-7-9-13/h4,6-9,11-12H,2-3,5,10H2,1H3	CCCCCC(C=O)=CC1=CC=CC=C1	C14 H18 O	202.136	1331-92-6, 121734-22-3		Odor Agent, Other Processing Aids		Automotive, Building & Construction, Electrical and Electronic Equipment, Food-contact plastics, Packaging, Textiles, Toys	1	14	Canada, China, EU, Japan, New Zealand, Nordic Countries, Philippines, Russia, South Korea, Taiwan, Thailand, Turkey, United States, Vietnam	1000	10	10000		11000		1					0	0	0	0	0	1	0		1	1	1	high	1	EU Toys directive	USA Food Contact Materials Positive List (GRAS)	1	0	1	0
654	'124-04-9	Hexanedioic acid	WNLRTRBMVRJNCN-UHFFFAOYSA-N	InChI=1S/C6H10O4/c7-5(8)3-1-2-4-6(9)10/h1-4H2,(H,7,8)(H,9,10)	OC(=O)CCCCC(O)=O	C6 H10 O4	146.058		1186514-28-2, 2023788-68-1	Colorant, Crosslinking Agent, Filler, Intermediates, Lubricant, Monomer, Other Processing Aids, Plasticizer	PA, PET, PUR	Automotive, Building & Construction, Electrical and Electronic Equipment, Food-contact plastics, Household items, furniture and other, Hygiene and Medical items, Packaging, Textiles, Toys	1	15	Canada, China, EU, Malaysia, Mexico, Nordic Countries, OECD, Philippines, Russia, South Korea, Taiwan, Thailand, Turkey, United States, Vietnam	1000000	10000	10000000	1000	11000000	0.5	0.5	0.5	0.5	0.5	0.5	0	0	0	0	1	0.5	0		1	1.5	1	high	0		EU Food Contact Materials Positive List, USA Food Contact Materials Positive List (GRAS), Japan Food Contact Materials Postiive List	1	1	1	1
657	'124-40-3	Methanamine, N-methyl-	ROSDSFDQCJNGOL-UHFFFAOYSA-N	InChI=1S/C2H7N/c1-3-2/h3H,1-2H3	CNC	C2 H7 N	45.0578			Catalyst, Colorant, Crosslinking Agent, Initiator, Intermediates, Lubricant, Other Processing Aids	Other - Rubber, PUR	Agriculture, Automotive, Food-contact plastics, Packaging, Textiles, Toys	1	14	Canada, China, EU, Japan, Malaysia, Mexico, Nordic Countries, OECD, Philippines, Russia, South Korea, Taiwan, United States, Vietnam	100000	1000	1000000	1000	1100000		1					0	0	0	0	1	1	0		1	2	1	high	0		USA Food Contact Materials Positive List (GRAS), Japan Food Contact Materials Postiive List	1	0	1	1
662	'126-86-3	5-Decyne-4,7-diol, 2,4,7,9-tetramethyl-	LXOFYPKXCSULTL-UHFFFAOYSA-N	InChI=1/C14H26O2/c1-11(2)9-13(5,15)7-8-14(6,16)10-12(3)4/h11-12,15-16H,9-10H2,1-6H3	CC(C)CC(C)(O)C#CC(C)(O)CC(C)C	C14 H26 O2	226.193		8043-35-4, 37211-43-1, 61879-19-4, 149079-55-0, 166737-17-3, 170006-53-8, 171023-04-4, 504414-59-9, 845642-79-7, 867273-13-0, 872345-61-4	Biocide, Colorant, Filler, Lubricant, Other Processing Aids		Agriculture, Automotive, Building & Construction, Electrical and Electronic Equipment, Food-contact plastics, Household items, furniture and other, Packaging, Textiles, Toys	1	14	Canada, China, EU, Japan, Mexico, Nordic Countries, Philippines, Russia, South Korea, Taiwan, Thailand, Turkey, United States, Vietnam	1000	100	100000		101000		1					0	0	0	0	0.5	1	0		1	1.5	1	high	0		USA Food Contact Materials Positive List (GRAS), Japan Food Contact Materials Postiive List	1	0	1	1
663	'127-19-5	Acetamide, N,N-dimethyl-	FXHOOIRPVKKKFG-UHFFFAOYSA-N	InChI=1S/C4H9NO/c1-4(6)5(2)3/h1-3H3	CN(C)C(C)=O	C4 H9 N O	87.0684			Crosslinking Agent, Filler, Other Processing Aids, Solvent	Other - Bioplastic, Other - Rubber, Other - Thermoplastic, PA, PUR	Agriculture, Building & Construction, Electrical and Electronic Equipment, Household items, furniture and other, Hygiene and Medical items, Textiles, Toys	0	15	Canada, China, EU, Malaysia, Mexico, Nordic Countries, OECD, Philippines, Russia, South Korea, Taiwan, Thailand, Turkey, United States, Vietnam	1000	100	100000	1000	101000		1					1	1	0	1	1	0	0		1	3	1	high	1	EU REACH SVHC, USA - California Proposition 65		0	0	0	0
665	'12738-64-6	╬▒-D-Glucopyranoside, ╬▓-D-fructofuranosyl, benzoate	AKIVKIDZMLQJCH-KWOGCLBWSA-N	InChI=1S/C68H54O19/c69-59(44-25-9-1-10-26-44)77-41-52-54(81-62(72)47-31-15-4-16-32-47)56(83-64(74)49-35-19-6-20-36-49)57(84-65(75)50-37-21-7-22-38-50)67(80-52)87-68(43-79-61(71)46-29-13-3-14-30-46)58(85-66(76)51-39-23-8-24-40-51)55(82-63(73)48-33-17-5-18-34-48)53(86-68)42-78-60(70)45-27-11-2-12-28-45/h1-40,52-58,67H,41-43H2/t52-,53-,54-,55-,56+,57-,58+,67-,68+/m1/s1	O=C(OC[C@H]1O[C@@](COC(=O)C2=CC=CC=C2)(O[C@H]2O[C@H](COC(=O)C3=CC=CC=C3)[C@@H](OC(=O)C3=CC=CC=C3)[C@H](OC(=O)C3=CC=CC=C3)[C@H]2OC(=O)C2=CC=CC=C2)[C@@H](OC(=O)C2=CC=CC=C2)[C@@H]1OC(=O)C1=CC=CC=C1)C1=CC=CC=C1	C12 H22 O11 . x C7 H6 O2	1174.33		56093-82-4	Filler, Other Processing Aids, Plasticizer		Food-contact plastics, Packaging	1	10	Canada, China, EU, Japan, New Zealand, Nordic Countries, South Korea, Taiwan, United States, Vietnam	1000	0	1000		2000		1					1	0	0	1	0.5	0	0		1	1.5	1	high	0		USA Food Contact Materials Positive List (GRAS), Japan Food Contact Materials Postiive List	1	0	1	1
669	'12767-90-7	Boron zinc oxide (B6Zn2O11)	OSHGZAHTGPVONH-UHFFFAOYSA-N	InChI=1S/6B.11O.2Zn/q6*+3;9*-2;2*-1;2*+1	[B+3].[B+3].[B+3].[B+3].[B+3].[B+3].[O--].[O--].[O--].[O--].[O--].[O--].[O--].[O--].[O--].[O-][Zn+].[O-][Zn+]	B . O . Zn	369.858		139354-75-9	Biocide, Colorant, Flame Retardant, Lubricant, Other Processing Aids	HDPE, LDPE, Other - Bioplastic, Other - Rubber, Other - Thermoplastic, PA, PET, PP, PS, PUR, PVC	Automotive, Building & Construction, Electrical and Electronic Equipment, Textiles	0	13	Canada, China, EU, Japan, Malaysia, New Zealand, Nordic Countries, Philippines, South Korea, Taiwan, Turkey, United States, Vietnam	100000	10	-1		100000		1					1	0	0	1	0	1	0		1	2	1	high	1	EU Toys directive, Korea REACH Authorisation		0	0	0	0
671	'127-91-3	Bicyclo[3.1.1]heptane, 6,6-dimethyl-2-methylene-	WTARULDDTDQWMU-UHFFFAOYSA-N	InChI=1/C10H16/c1-7-4-5-8-6-9(7)10(8,2)3/h8-9H,1,4-6H2,2-3H3	CC1(C)C2CC1C(=C)CC2	C10 H16	136.125		23089-32-9	Monomer, Odor Agent		Automotive, Building & Construction, Electrical and Electronic Equipment, Food-contact plastics, Household items, furniture and other, Packaging, Textiles, Toys	1	14	Canada, China, EU, Japan, Mexico, Nordic Countries, OECD, Philippines, South Korea, Taiwan, Thailand, Turkey, United States, Vietnam		100	100000	1000	100100		1					0	0	0	0	0	1	0		1	1	1	high	0		EU Food Contact Materials Positive List, USA Food Contact Materials Positive List (GRAS), Japan Food Contact Materials Postiive List	1	1	1	1
675	'1309-37-1	Iron oxide (Fe2O3)	LIKBJVNGSGBSGK-UHFFFAOYSA-N	InChI=1S/2Fe.3O/q2*+3;3*-2	[O--].[O--].[O--].[Fe+3].[Fe+3]	Fe2 O3	159.855		1343-09-5, 8011-97-0, 8049-50-1, 12000-93-0, 12002-17-4, 12227-87-1, 60880-86-6, 65455-44-9, 65637-71-0, 88528-26-1, 90452-21-4, 110736-41-9, 118277-31-9, 129131-59-5, 131874-41-4, 135507-53-8, 147229-90-1, 147229-91-2, 160186-10-7, 177715-24-1, 185464-44-2, 188357-78-0, 220787-06-4, 253310-52-0, 448923-71-5, 741267-31-2, 1115688-11-3, 1146982-11-7, 1210992-56-5, 1382787-02-1, 1397708-80-3, 14300…	Biocide, Colorant, Filler, Intermediates, Lubricant, Odor Agent, Other Processing Aids	ABS, HDPE, LDPE, Other - Thermoplastic, PA, PC, PET, PP, PS, PUR, PVC	Agriculture, Automotive, Building & Construction, Electrical and Electronic Equipment, Food-contact plastics, Household items, furniture and other, Hygiene and Medical items, Packaging, Textiles, Toys	1	16	Canada, China, EU, Japan, Malaysia, Mexico, Nordic Countries, OECD, Philippines, Russia, South Korea, Taiwan, Thailand, Turkey, United States, Vietnam	1000000	100000	100000000	1000	101000000		1					0	0	0	0	1	0	0		1	1	1	high	0		USA Food Contact Materials Positive List (GRAS), Japan Food Contact Materials Postiive List	1	0	1	1
676	'1309-48-4	Magnesium oxide (MgO)	AXZKOIWUVFPNLO-UHFFFAOYSA-N	InChI=1S/Mg.O/q+2;-2	[O--].[Mg++]	Mg O	39.98		13589-16-7, 52933-73-0, 82375-77-7, 185461-91-0, 187036-80-2, 227961-49-1, 1193320-89-6	Antioxidant, Catalyst, Colorant, Crosslinking Agent, Filler, Flame Retardant, Lubricant, Monomer, Other Processing Aids, Plasticizer	Other - Rubber, PP, PVC	Agriculture, Automotive, Building & Construction, Electrical and Electronic Equipment, Food-contact plastics, Household items, furniture and other, Hygiene and Medical items, Packaging, Textiles	1	16	Canada, China, EU, Japan, Malaysia, Mexico, Nordic Countries, OECD, Philippines, Russia, South Korea, Taiwan, Thailand, Turkey, United States, Vietnam		100000	1000000	1000	1100000		1					0.5	0	0	0.5	0.5	1	1		1	2	1	high	0		EU Food Contact Materials Positive List, USA Food Contact Materials Positive List (GRAS), Japan Food Contact Materials Postiive List	1	1	1	1
677	'1310-58-3	Potassium hydroxide (K(OH))	KWYUFKZDYYNOTN-UHFFFAOYSA-M	InChI=1S/K.H2O/h;1H2/q+1;/p-1	[OH-].[K+]	H K O	55.9664		29857-72-5, 71769-53-4, 2226392-06-7	Antioxidant, Biocide, Catalyst, Colorant, Filler, Intermediates, Light Stabilizer, Lubricant, Odor Agent, Other Processing Aids, Plasticizer	Other - Thermoplastic, PUR	Agriculture, Automotive, Building & Construction, Electrical and Electronic Equipment, Food-contact plastics, Household items, furniture and other, Hygiene and Medical items, Packaging, Textiles	1	17	Canada, China, EU, India, Japan, Malaysia, Mexico, Nordic Countries, OECD, Philippines, Russia, South Korea, Taiwan, Thailand, Turkey, United States, Vietnam	100000	100000	10000000	1000	10100000		1					0	0	0	0	1	0	0		1	1	1	high	1	Korea REACH Authorisation	EU Food Contact Materials Positive List, USA Food Contact Materials Positive List (GRAS), Japan Food Contact Materials Postiive List	1	1	1	1
680	'131-17-9	1,2-Benzenedicarboxylic acid, 1,2-di-2-propen-1-yl ester	QUDWYFHPNIMBFC-UHFFFAOYSA-N	InChI=1S/C14H14O4/c1-3-9-17-13(15)11-7-5-6-8-12(11)14(16)18-10-4-2/h3-8H,1-2,9-10H2	C=CCOC(=O)C1=C(C=CC=C1)C(=O)OCC=C	C14 H14 O4	246.089		124743-27-7, 143318-73-4	Catalyst, Colorant, Crosslinking Agent, Initiator, Intermediates, Monomer, Other Processing Aids, Plasticizer	Other - Rubber, PET, PUR, PVC	Building & Construction, Electrical and Electronic Equipment, Food-contact plastics, Household items, furniture and other, Packaging, Textiles	1	16	Canada, China, EU, Japan, Malaysia, Mexico, Nordic Countries, OECD, Philippines, Russia, South Korea, Taiwan, Thailand, Turkey, United States, Vietnam	10000	10	10000	1000	20000		1					1	0.5	1	0	0.5	1	0		1	3	1	high	0		EU Food Contact Materials Positive List, USA Food Contact Materials Positive List (GRAS), Japan Food Contact Materials Postiive List	1	1	1	1
681	'13122-18-4	Hexaneperoxoic acid, 3,5,5-trimethyl-, 1,1-dimethylethyl ester	VSJBBIJIXZVVLQ-UHFFFAOYSA-N	InChI=1/C13H26O3/c1-10(9-12(2,3)4)8-11(14)15-16-13(5,6)7/h10H,8-9H2,1-7H3	CC(CC(=O)OOC(C)(C)C)CC(C)(C)C	C13 H26 O3	230.188		153302-08-0	Antioxidant, Catalyst, Crosslinking Agent, Initiator, Other Processing Aids, Plasticizer		Automotive, Building & Construction, Food-contact plastics, Household items, furniture and other, Packaging	1	13	Canada, China, EU, Malaysia, Nordic Countries, Philippines, Russia, South Korea, Taiwan, Thailand, Turkey, United States, Vietnam	10000	100	1000		11000		1					0	0	0	0	0	1	0		1	1	1	high	0			0	0	0	0
682	'1314-13-2	Zinc oxide (ZnO)	XLOMVQKBTHCTTD-UHFFFAOYSA-N	InChI=1S/O.Zn/q-2;+2	[O--].[Zn++]	O Zn	79.9241		8011-84-5, 8047-36-7, 8047-69-6, 8050-42-8, 8051-03-4, 56592-00-8, 57206-86-7, 91315-44-5, 143477-34-3, 185461-95-4, 768390-32-5, 1035159-71-7, 1079737-05-5, 1158650-40-8, 1227055-55-1, 1328870-15-0, 1352121-28-8, 1404365-15-6, 1434578-69-4, 1449007-65-1, 1613512-66-5, 1621460-93-2, 1629869-94-8, 1799390-27-4, 1834590-43-0, 1928718-93-7, 2082751-40-2, 2111100-94-6, 2251116-56-8, 2257421-96-6	Antioxidant, Antistatic Agent, Biocide, Blowing Agent, Catalyst, Colorant, Crosslinking Agent, Filler, Flame Retardant, Heat Stabilizer, Initiator, Intermediates, Light Stabilizer, Lubricant, Odor Agent, Other Processing Aids	ABS, HDPE, LDPE, Other - Thermoplastic, PA, PC, PET, PP, PS, PUR, PVC	Agriculture, Automotive, Building & Construction, Electrical and Electronic Equipment, Food-contact plastics, Household items, furniture and other, Hygiene and Medical items, Packaging, Textiles, Toys	1	16	Canada, China, EU, Japan, Malaysia, Mexico, Nordic Countries, OECD, Philippines, Russia, South Korea, Taiwan, Thailand, Turkey, United States, Vietnam	1000000	10000	1000000	1000	2000000		1					1	1	0.5	1	1	1	0		1	4.5	1	high	1	EU Toys directive	EU Food Contact Materials Positive List, USA Food Contact Materials Positive List (GRAS), Japan Food Contact Materials Postiive List	1	1	1	1
684	'1314-98-3	Zinc sulfide (ZnS)	DRDVZXDWVBGGMH-UHFFFAOYSA-N	InChI=1S/S.Zn/q-2;+2	[S--].[Zn++]	S Zn	95.9012		37187-67-0, 64334-34-5, 209065-88-3, 714217-01-3, 2247447-30-7	Biocide, Colorant, Crosslinking Agent, Filler, Intermediates, Light Stabilizer, Lubricant, Odor Agent, Other Processing Aids	ABS, HDPE, LDPE, Other - Thermoplastic, PA, PC, PET, PP, PS, PUR	Automotive, Building & Construction, Electrical and Electronic Equipment, Food-contact plastics, Household items, furniture and other, Packaging, Textiles	1	15	Canada, China, EU, Japan, Mexico, Nordic Countries, OECD, Philippines, Russia, South Korea, Taiwan, Thailand, Turkey, United States, Vietnam	1000000	1000000	10000	1000	1010000		1					0	0	0	0	0	1	1		1	1	1	high	1	EU Toys directive	EU Food Contact Materials Positive List, USA Food Contact Materials Positive List (GRAS), Japan Food Contact Materials Postiive List	1	1	1	1
686	'1317-61-9	Iron oxide (Fe3O4)	WTFXARWRTYJXII-UHFFFAOYSA-N	InChI=1S/3Fe.4O/q+2;2*+3;4*-2	[O--].[O--].[O--].[O--].[Fe++].[Fe+3].[Fe+3]	Fe3 O4	231.784		73905-81-4, 107720-80-9, 118440-50-9, 122391-58-6, 139660-10-9, 144856-04-2, 170277-36-8, 207621-21-4, 208666-79-9, 219674-87-0, 224310-08-1, 253310-51-9, 514204-11-6, 940941-19-5, 942194-22-1, 954415-69-1, 1402398-17-7, 1433983-76-6, 1481694-60-3, 1643773-71-0, 1988696-47-4, 2031170-98-4, 2367641-45-8	Antioxidant, Biocide, Colorant, Crosslinking Agent, Filler, Intermediates, Lubricant, Odor Agent, Other Processing Aids	ABS, HDPE, LDPE, Other - Rubber, Other - Thermoplastic, PA, PC, PET, PP, PS, PUR, PVC	Agriculture, Automotive, Building & Construction, Electrical and Electronic Equipment, Household items, furniture and other, Hygiene and Medical items, Textiles, Toys	0	15	Canada, China, EU, Japan, Mexico, Nordic Countries, OECD, Philippines, Russia, South Korea, Taiwan, Thailand, Turkey, United States, Vietnam	1000000	10000	100000	1000	1100000		1					0.5	0	0	0.5	1	0	0		1	1.5	1	high	0			0	0	0	0
687	'1317-65-3	Limestone				Unspecified			359415-48-8, 2358712-58-8, 2358714-65-3	Catalyst, Colorant, Crosslinking Agent, Filler, Intermediates, Light Stabilizer, Lubricant, Other Processing Aids, Viscosity Modifier	ABS, EPS, HDPE, HIPS, LDPE, Other - Bioplastic, Other - Thermoplastic, PA, PC, PET, PP, PS, PUR, PVC	Agriculture, Automotive, Building & Construction, Electrical and Electronic Equipment, Food-contact plastics, Household items, furniture and other, Packaging, Textiles, Toys	1	13	China, EU, Malaysia, Mexico, Nordic Countries, OECD, Philippines, South Korea, Taiwan, Thailand, Turkey, United States, Vietnam		1000000	1000000	1000	2000000		1					1	1	0	0	1	0	0		1	2	1	high	0		Japan Food Contact Materials Postiive List	1	0	0	1
689	'1330-20-7	Benzene, dimethyl-	CTQNGGLPUBDAKN-UHFFFAOYSA-N			C8 H10			8026-09-03	Antistatic Agent, Biocide, Catalyst, Colorant, Crosslinking Agent, Filler, Intermediates, Light Stabilizer, Lubricant, Other Processing Aids, Plasticizer, Solvent	ABS, Other - Thermoplastic, PUR	Agriculture, Automotive, Building & Construction, Electrical and Electronic Equipment, Food-contact plastics, Household items, furniture and other, Hygiene and Medical items, Packaging, Textiles, Toys	1	17	Canada, China, EU, India, Japan, Malaysia, Mexico, Nordic Countries, OECD, Philippines, Russia, South Korea, Taiwan, Thailand, Turkey, United States, Vietnam	10000	100000	10000000	1000	10010000		1					1	0	0	1	1	1	0		1	3	1	high	1	Korea REACH Authorisation	USA Food Contact Materials Positive List (GRAS), Japan Food Contact Materials Postiive List	1	0	1	1
690	'1332-37-2	Iron oxide	WTFXARWRTYJXII-UHFFFAOYSA-N			Unspecified			8075-66-9, 1198473-26-5, 1701487-83-3, 1820799-17-4, 2038179-84-7, 2114385-10-1, 2242797-76-6	Colorant, Crosslinking Agent, Filler, Other Processing Aids		Agriculture, Automotive, Building & Construction, Electrical and Electronic Equipment, Food-contact plastics, Packaging, Textiles	1	15	Canada, China, EU, Japan, Mexico, New Zealand, Nordic Countries, OECD, Philippines, South Korea, Taiwan, Thailand, Turkey, United States, Vietnam		1000	100000	1000	101000		1					0	0	0	0	1	0	0		1	1	1	high	0		EU Food Contact Materials Positive List, USA Food Contact Materials Positive List (GRAS), Japan Food Contact Materials Postiive List	1	1	1	1
691	'1332-58-7	Kaolin				Unspecified			12198-85-5, 12199-11-0, 39406-22-9, 52624-41-6, 90803-81-9, 95077-05-7, 190086-05-6, 290817-34-4, 384842-32-4, 849104-81-0, 862272-04-6, 903527-69-5, 944250-63-9, 1026990-70-4, 1227491-10-2	Catalyst, Colorant, Crosslinking Agent, Filler, Intermediates, Light Stabilizer, Lubricant, Other Processing Aids, Plasticizer	HDPE, LDPE, Other - Rubber, PA, PET, PUR, PVC	Agriculture, Automotive, Building & Construction, Electrical and Electronic Equipment, Food-contact plastics, Household items, furniture and other, Hygiene and Medical items, Packaging, Textiles, Toys	1	15	Canada, China, EU, Malaysia, Mexico, Nordic Countries, OECD, Philippines, Russia, South Korea, Taiwan, Thailand, Turkey, United States, Vietnam		10000	10000000	1000	10010000		1					1	1	0	0	1	0	1		1	2	1	high	0		EU Food Contact Materials Positive List, USA Food Contact Materials Positive List (GRAS), Japan Food Contact Materials Postiive List	1	1	1	1
692	'1333-86-4	Carbon black				Unspecified			1343-03-9, 12768-98-8, 52623-24-2, 53095-52-6, 53851-02-8, 55353-42-9, 55607-95-9, 56257-79-5, 56257-80-8, 56274-59-0, 56729-25-0, 56729-26-1, 58517-29-6, 61512-59-2, 63661-31-4, 64427-56-1, 72536-89-1, 73560-38-0, 75026-75-4, 76632-92-3, 79921-09-8, 97708-44-6, 97793-37-8, 101239-80-9, 106907-70-4, 109766-76-9, 124760-06-1, 131640-45-4, 133136-50-2, 138464-41-2, 147335-73-7, 179607-25-1, 181719-…	Antistatic Agent, Biocide, Colorant, Crosslinking Agent, Filler, Intermediates, Light Stabilizer, Lubricant, Odor Agent, Other Processing Aids, Plasticizer	ABS, HDPE, HIPS, LDPE, Other - Bioplastic, Other - Rubber, Other - Thermoplastic, PA, PC, PET, PP, PS, PUR, PVC	Agriculture, Automotive, Building & Construction, Electrical and Electronic Equipment, Food-contact plastics, Household items, furniture and other, Hygiene and Medical items, Packaging, Textiles, Toys	1	15	Canada, China, EU, Malaysia, Mexico, Nordic Countries, OECD, Philippines, Russia, South Korea, Taiwan, Thailand, Turkey, United States, Vietnam	10000000	100000	10000000	1000	20000000		1					0.5	0.5	0	0	1	0	0		1	1.5	1	high	1	USA - California Proposition 65	EU Food Contact Materials Positive List, USA Food Contact Materials Positive List (GRAS), Japan Food Contact Materials Postiive List	1	1	1	1
696	'1344-28-1	Aluminum oxide (Al2O3)				Al2 O3			12522-88-2, 12737-16-5, 39354-49-9, 53809-96-4, 54352-04-4, 67853-35-4, 67894-14-8, 67894-42-2, 68189-68-4, 68389-42-4, 68389-43-5, 74871-10-6, 76363-38-7, 76363-81-0, 84149-21-3, 90669-62-8, 107462-07-7, 107874-14-6, 117314-00-8, 122784-35-4, 127361-04-0, 131689-14-0, 135152-65-7, 135667-70-8, 138361-58-7, 148619-39-0, 152743-26-5, 153858-98-1, 157516-29-5, 163581-50-8, 165390-91-0, 170448-81-4,…	Antistatic Agent, Biocide, Catalyst, Colorant, Crosslinking Agent, Filler, Initiator, Intermediates, Light Stabilizer, Lubricant, Odor Agent, Other Processing Aids, Plasticizer	PA	Agriculture, Automotive, Building & Construction, Electrical and Electronic Equipment, Food-contact plastics, Household items, furniture and other, Hygiene and Medical items, Packaging, Textiles, Toys	1	15	Canada, China, EU, Japan, Malaysia, Mexico, Nordic Countries, OECD, Philippines, South Korea, Taiwan, Thailand, Turkey, United States, Vietnam	10000000	1000000	10000000	1000	20000000		1					1	1	0.5	0.5	1	0	0		1	3	1	high	1	EU Toys directive	EU Food Contact Materials Positive List, USA Food Contact Materials Positive List (GRAS), Japan Food Contact Materials Postiive List	1	1	1	1
699	'1345-16-0	C.I. Pigment Blue 28				Unspecified			68186-86-7, 160936-12-9, 952441-16-6, 1219711-24-6, 1447840-03-0, 1910076-02-6, 2136320-10-8	Colorant, Filler, Other Processing Aids	ABS, HDPE, LDPE, Other - Thermoplastic, PA, PC, PET, PP, PS, PUR, PVC	Automotive, Building & Construction, Electrical and Electronic Equipment, Food-contact plastics, Packaging, Textiles, Toys	1	13	Canada, China, EU, Japan, Mexico, Nordic Countries, OECD, Philippines, South Korea, Taiwan, Turkey, United States, Vietnam	10000	100	-1	1000	10000		1					0	0	0	0	0	1	1		1	1	1	high	0		Japan Food Contact Materials Postiive List	1	0	0	1
700	'13463-67-7	Titanium oxide (TiO2)	SOQBVABWOPYFQZ-UHFFFAOYSA-N	InChI=1S/2O.Ti/q2*-2;+4	[O--].[O--].[Ti+4]	O2 Ti	79.9378	51745-87-0	1309-63-3, 1344-29-2, 12000-59-8, 12701-76-7, 12767-65-6, 12789-63-8, 37230-92-5, 37230-94-7, 37230-95-8, 37230-96-9, 39320-58-6, 39360-64-0, 39379-02-7, 52624-13-2, 55068-84-3, 55068-85-4, 62338-64-1, 97929-50-5, 98084-96-9, 100292-32-8, 101239-53-6, 116788-85-3, 158518-86-6, 185323-71-1, 185828-91-5, 188357-76-8, 188357-79-1, 195740-11-5, 221548-98-7, 224963-00-2, 246178-32-5, 252962-41-7, 2941…	Biocide, Catalyst, Colorant, Crosslinking Agent, Filler, Intermediates, Light Stabilizer, Lubricant, Odor Agent, Other Processing Aids, Plasticizer, Viscosity Modifier	ABS, HDPE, LDPE, Other - Bioplastic, Other - Rubber, Other - Thermoplastic, PA, PC, PET, PP, PS, PUR, PVC	Agriculture, Automotive, Building & Construction, Electrical and Electronic Equipment, Food-contact plastics, Household items, furniture and other, Hygiene and Medical items, Packaging, Textiles, Toys	1	17	Canada, China, EU, India, Japan, Malaysia, Mexico, Nordic Countries, OECD, Philippines, Russia, South Korea, Taiwan, Thailand, Turkey, United States, Vietnam	1000000	1000000	10000000	1000	11000000		1					1	1	0.5	0	1	0	1		1	2.5	1	high	0		EU Food Contact Materials Positive List, USA Food Contact Materials Positive List (GRAS), Japan Food Contact Materials Postiive List	1	1	1	1
702	'135-57-9	Benzamide, N,N'-(dithiodi-2,1-phenylene)bis-	ZHMIOPLMFZVSHY-UHFFFAOYSA-N	InChI=1S/C26H20N2O2S2/c29-25(19-11-3-1-4-12-19)27-21-15-7-9-17-23(21)31-32-24-18-10-8-16-22(24)28-26(30)20-13-5-2-6-14-20/h1-18H,(H,27,29)(H,28,30)	O=C(NC1=CC=CC=C1SSC1=C(NC(=O)C2=CC=CC=C2)C=CC=C1)C1=CC=CC=C1	C26 H20 N2 O2 S2	456.097			Lubricant, Plasticizer		Food-contact plastics, Packaging	1	16	Canada, China, EU, Japan, Malaysia, Mexico, New Zealand, Nordic Countries, OECD, Philippines, South Korea, Taiwan, Thailand, Turkey, United States, Vietnam	10000	10	10000	1000	20000	0.5	0.5	0.5	0.5	0.5	0.5	0	0	0	0	0	1	0		1	1	1	high	0		USA Food Contact Materials Positive List (GRAS)	1	0	1	0
704	'136-23-2	Zinc, bis(dibutylcarbamodithioato-╬║S,╬║S')-, (T-4)-	BOXSVZNGTQTENJ-UHFFFAOYSA-L	InChI=1S/2C9H19NS2.Zn/c2*1-3-5-7-10(9(11)12)8-6-4-2;/h2*3-8H2,1-2H3,(H,11,12);/q;;+2/p-2	[Zn++].CCCCN(CCCC)C([S-])=S.CCCCN(CCCC)C([S-])=S	C18 H36 N2 S4 Zn	472.105		13497-84-2, 20609-60-3, 942266-56-0, 1192843-75-6, 1883563-94-7	Antioxidant, Catalyst, Colorant, Crosslinking Agent, Filler, Initiator, Other Processing Aids		Automotive, Building & Construction, Electrical and Electronic Equipment, Food-contact plastics, Household items, furniture and other, Packaging, Textiles, Toys	1	16	Canada, China, EU, Japan, Malaysia, Mexico, Nordic Countries, OECD, Philippines, Russia, South Korea, Taiwan, Thailand, Turkey, United States, Vietnam	10000	100	10000	1000	20000		1					0	0	0	0	0	1	0		1	1	1	high	1	EU Toys directive	USA Food Contact Materials Positive List (GRAS), Japan Food Contact Materials Postiive List	1	0	1	1
705	'136-53-8	Hexanoic acid, 2-ethyl-, zinc salt (2:1)	IFNXAMCERSVZCV-UHFFFAOYSA-L	InChI=1/2C8H16O2.Zn/c2*1-3-5-6-7(4-2)8(9)10;/h2*7H,3-6H2,1-2H3,(H,9,10);/q;;+2/p-2	[Zn++].CCCCC(CC)C([O-])=O.CCCCC(CC)C([O-])=O	C8 H16 O2 . 1/2 Zn	350.144		157321-97-6, 1000888-64-1, 1427465-86-8, 1615656-61-5	Catalyst, Colorant, Filler, Heat Stabilizer, Light Stabilizer, Lubricant, Other Processing Aids, Plasticizer	PVC	Automotive, Building & Construction, Food-contact plastics, Household items, furniture and other, Packaging, Textiles	1	14	Canada, China, EU, Malaysia, Mexico, Nordic Countries, OECD, Philippines, South Korea, Taiwan, Thailand, Turkey, United States, Vietnam	10000	100	10000	1000	20000		1					1	0	0	1	0	1	0		1	2	1	high	1	EU Toys directive	USA Food Contact Materials Positive List (GRAS), Japan Food Contact Materials Postiive List	1	0	1	1
707	'13676-54-5	1H-Pyrrole-2,5-dione, 1,1'-(methylenedi-4,1-phenylene)bis-	XQUPVDVFXZDTLT-UHFFFAOYSA-N	InChI=1S/C21H14N2O4/c24-18-9-10-19(25)22(18)16-5-1-14(2-6-16)13-15-3-7-17(8-4-15)23-20(26)11-12-21(23)27/h1-12H,13H2	O=C1C=CC(=O)N1C1=CC=C(CC2=CC=C(C=C2)N2C(=O)C=CC2=O)C=C1	C21 H14 N2 O4	358.095		35325-39-4, 128605-25-4, 146267-52-9, 164796-17-2, 172664-39-0, 180051-53-0, 184874-68-8, 191356-15-7, 352219-58-0, 449213-21-2, 459429-26-6, 574759-58-3, 1262658-03-6, 1416794-09-6, 1429310-61-1	Crosslinking Agent, Intermediates, Other Processing Aids			0	12	Canada, China, EU, Japan, New Zealand, Nordic Countries, Philippines, South Korea, Taiwan, Thailand, United States, Vietnam	1000	10	1000		2000		1					0.5	0	0.5	0	0	1	0		1	1.5	1	high	0			0	0	0	0
708	'137-26-8	Thioperoxydicarbonic diamide ([(H2N)C(S)]2S2), N,N,N',N'-tetramethyl-	KUAZQDVKQLNFPE-UHFFFAOYSA-N	InChI=1S/C6H12N2S4/c1-7(2)5(9)11-12-6(10)8(3)4/h1-4H3	CN(C)C(=S)SSC(=S)N(C)C	C6 H12 N2 S4	239.988		12680-07-8, 12680-62-5, 39456-80-9, 56645-31-9, 66173-72-6, 92481-09-9, 93196-73-7, 200889-05-0, 1135443-08-1, 2213445-87-3	Biocide, Catalyst, Crosslinking Agent, Filler, Initiator, Other Processing Aids	Other - Rubber	Agriculture, Automotive, Building & Construction, Electrical and Electronic Equipment, Food-contact plastics, Household items, furniture and other, Packaging, Textiles	1	17	Canada, China, EU, Japan, Malaysia, Mexico, New Zealand, Nordic Countries, OECD, Philippines, Russia, South Korea, Taiwan, Thailand, Turkey, United States, Vietnam	10000	100	10000	1000	20000		1					1	0	1	0.5	1	1	0	0	1	3.5	1	high	1	Rotterdam Convention, Rotterdam Convention (EU PIC List), Korea REACH Authorisation	USA Food Contact Materials Positive List (GRAS)	1	0	1	0
709	'137-30-4	Zinc, bis(N,N-dimethylcarbamodithioato-╬║S,╬║S')-, (T-4)-	DUBNHZYBDBBJHD-UHFFFAOYSA-L	InChI=1S/2C3H7NS2.Zn/c2*1-4(2)3(5)6;/h2*1-2H3,(H,5,6);/q;;+2/p-2	[Zn++].CN(C)C([S-])=S.CN(C)C([S-])=S	C6 H12 N2 S4 Zn	303.917	14460-20-9	8059-74-3, 8070-07-3, 12768-61-5, 12773-04-5, 14459-91-7, 17125-91-6, 19488-81-4, 31300-71-7, 50933-80-7, 55870-88-7, 98391-07-2, 111922-61-3, 1079126-29-6, 1135443-10-5	Biocide, Catalyst, Crosslinking Agent, Initiator, Other Processing Aids	Other - Rubber	Automotive, Building & Construction, Electrical and Electronic Equipment, Food-contact plastics, Packaging, Textiles	1	16	Canada, China, EU, Japan, Malaysia, Mexico, Nordic Countries, OECD, Philippines, Russia, South Korea, Taiwan, Thailand, Turkey, United States, Vietnam	1000	10	1000	1000	2000		1					1	0	1	0.5	1	1	0	0.5	1	4	1	high	1	EU Toys directive, Korea REACH Authorisation	USA Food Contact Materials Positive List (GRAS)	1	0	1	0
712	'140-11-4	Acetic acid, phenylmethyl ester	QUKGYYKBILRGFE-UHFFFAOYSA-N	InChI=1S/C9H10O2/c1-8(10)11-7-9-5-3-2-4-6-9/h2-6H,7H2,1H3	CC(=O)OCC1=CC=CC=C1	C9 H10 O2	150.068			Biocide, Colorant, Filler, Lubricant, Odor Agent, Other Processing Aids		Agriculture, Automotive, Building & Construction, Electrical and Electronic Equipment, Food-contact plastics, Household items, furniture and other, Packaging, Textiles, Toys	1	16	Canada, China, EU, Japan, Malaysia, Mexico, Nordic Countries, OECD, Philippines, Russia, South Korea, Taiwan, Thailand, Turkey, United States, Vietnam	10000	10	10000	1000	20000		1					0	0	0	0	1	0.5	0		1	1.5	1	high	0		USA Food Contact Materials Positive List (GRAS)	1	0	1	0
713	'14059-33-7	Bismuth vanadium oxide (BiVO4)	YNOWMDYNXXVJMC-UHFFFAOYSA-N	InChI=1S/Bi.4O.V/q+3;;3*-1;	[Bi+3].[O-][V]([O-])([O-])=O	Bi . O . V	323.904		52037-34-0, 126729-57-5, 207748-42-3, 210909-43-6, 308084-60-8, 316365-70-5, 950838-94-5, 1197994-50-5, 1678543-69-5, 2005446-68-2	Colorant, Filler	ABS, HDPE, LDPE, Other - Thermoplastic, PA, PC, PET, PP, PS, PUR, PVC	Automotive, Building & Construction, Electrical and Electronic Equipment, Household items, furniture and other, Packaging, Textiles	0	13	Canada, China, EU, Japan, New Zealand, Nordic Countries, Philippines, Russia, South Korea, Taiwan, Turkey, United States, Vietnam	10000	1000	10000		20000		1					0	0	0	0	1	0	0		1	1	1	high	0			0	0	0	0
714	'141-17-3	Hexanedioic acid, 1,6-bis[2-(2-butoxyethoxy)ethyl] ester	SCABKEBYDRTODC-UHFFFAOYSA-N	InChI=1S/C22H42O8/c1-3-5-11-25-13-15-27-17-19-29-21(23)9-7-8-10-22(24)30-20-18-28-16-14-26-12-6-4-2/h3-20H2,1-2H3	CCCCOCCOCCOC(=O)CCCCC(=O)OCCOCCOCCCC	C22 H42 O8	434.288		62863-07-4, 79806-00-1, 130455-63-9, 194548-85-1	Biocide, Colorant, Filler, Intermediates, Lubricant, Odor Agent, Other Processing Aids, Plasticizer	Other - Bioplastic, Other - Rubber, Other - Thermoplastic, PUR, PVC	Automotive, Building & Construction, Food-contact plastics, Packaging, Textiles	1	12	Canada, China, EU, Japan, Nordic Countries, Philippines, South Korea, Taiwan, Thailand, Turkey, United States, Vietnam	1000	10	10000		11000		1					0	0	0	0	0	1	0		1	1	1	high	0		USA Food Contact Materials Positive List (GRAS), Japan Food Contact Materials Postiive List	1	0	1	1
716	'142-16-5	2-Butenedioic acid (2Z)-, 1,4-bis(2-ethylhexyl) ester	ROPXFXOUUANXRR-YPKPFQOOSA-N	InChI=1/C20H36O4/c1-5-9-11-17(7-3)15-23-19(21)13-14-20(22)24-16-18(8-4)12-10-6-2/h13-14,17-18H,5-12,15-16H2,1-4H3/b14-13-	CCCCC(CC)COC(=O)\C=C/C(=O)OCC(CC)CCCC	C20 H36 O4	340.261		48075-77-0, 77666-69-4	Colorant, Intermediates, Monomer, Other Processing Aids, Plasticizer	Other - Thermoplastic, PVC	Building & Construction, Electrical and Electronic Equipment, Food-contact plastics, Packaging, Textiles, Toys	1	15	Canada, China, EU, Japan, Mexico, New Zealand, Nordic Countries, OECD, Philippines, South Korea, Taiwan, Thailand, Turkey, United States, Vietnam	10000	100	100000	1000	110000		1					0	0	0	0	0.5	1	0		1	1.5	1	high	0		USA Food Contact Materials Positive List (GRAS)	1	0	1	0
717	'142-19-8	Heptanoic acid, 2-propen-1-yl ester	SJWKGDGUQTWDRV-UHFFFAOYSA-N	InChI=1S/C10H18O2/c1-3-5-6-7-8-10(11)12-9-4-2/h4H,2-3,5-9H2,1H3	CCCCCCC(=O)OCC=C	C10 H18 O2	170.131			Odor Agent		Automotive, Building & Construction, Electrical and Electronic Equipment, Household items, furniture and other, Textiles	0	14	Canada, China, EU, Mexico, New Zealand, Nordic Countries, Philippines, Russia, South Korea, Taiwan, Thailand, Turkey, United States, Vietnam	1000	10	1000		2000		1					0	0	0	0	0.5	1	0		1	1.5	1	high	0		USA Food Contact Materials Positive List (GRAS)	1	0	1	0
721	'142-90-5	2-Propenoic acid, 2-methyl-, dodecyl ester	GMSCBRSQMRDRCD-UHFFFAOYSA-N	InChI=1S/C16H30O2/c1-4-5-6-7-8-9-10-11-12-13-14-18-16(17)15(2)3/h2,4-14H2,1,3H3	CCCCCCCCCCCCOC(=O)C(C)=C	C16 H30 O2	254.225		170292-57-6, 279231-66-2, 1274821-28-1	Colorant, Filler, Initiator, Intermediates, Lubricant, Monomer, Other Processing Aids	Other - Thermoplastic	Agriculture, Automotive, Building & Construction, Electrical and Electronic Equipment, Food-contact plastics, Household items, furniture and other, Packaging, Textiles	1	13	Canada, China, EU, Japan, Nordic Countries, OECD, Philippines, South Korea, Taiwan, Thailand, Turkey, United States, Vietnam	100000	10000	100000	1000	200000		1					0	0	0	0	0	1	0		1	1	1	high	0		Japan Food Contact Materials Postiive List	1	0	0	1
722	'142-92-7	Acetic acid, hexyl ester	AOGQPLXWSUTHQB-UHFFFAOYSA-N	InChI=1S/C8H16O2/c1-3-4-5-6-7-10-8(2)9/h3-7H2,1-2H3	CCCCCCOC(C)=O	C8 H16 O2	144.115			Biocide, Colorant, Filler, Intermediates, Lubricant, Odor Agent, Other Processing Aids, Plasticizer	LDPE, PA, PET	Automotive, Building & Construction, Electrical and Electronic Equipment, Food-contact plastics, Packaging, Textiles	1	13	Canada, China, EU, Nordic Countries, OECD, Philippines, Russia, South Korea, Taiwan, Thailand, Turkey, United States, Vietnam	10000	100	10000	1000	20000		1					0	0	0	0	0.5	1	0		1	1.5	1	high	0		USA Food Contact Materials Positive List (GRAS)	1	0	1	0
727	'144-62-7	Ethanedioic acid	MUBZPKHOEPUJKR-UHFFFAOYSA-N	InChI=1S/C2H2O4/c3-1(4)2(5)6/h(H,3,4)(H,5,6)	OC(=O)C(O)=O	C2 H2 O4	89.9953		63504-28-9, 97993-78-7, 216451-38-6	Colorant, Filler, Intermediates, Monomer, Other Processing Aids, Plasticizer		Automotive, Building & Construction, Electrical and Electronic Equipment, Food-contact plastics, Household items, furniture and other, Packaging, Textiles	1	15	Canada, China, EU, Malaysia, Mexico, Nordic Countries, OECD, Philippines, Russia, South Korea, Taiwan, Thailand, Turkey, United States, Vietnam	100000	1000	10000	1000	110000		1					0.5	0	0	0.5	1	0.5	0		1	2	1	high	0		EU Food Contact Materials Positive List, USA Food Contact Materials Positive List (GRAS), Japan Food Contact Materials Postiive List	1	1	1	1
728	'147-14-8	Copper, [29H,31H-phthalocyaninato(2-)-╬║N29,╬║N30,╬║N31,╬║N32]-, (SP-4-1)-	XCJYREBRNVKWGJ-UHFFFAOYSA-N	InChI=1S/C32H16N8.Cu/c1-2-10-18-17(9-1)25-33-26(18)38-28-21-13-5-6-14-22(21)30(35-28)40-32-24-16-8-7-15-23(24)31(36-32)39-29-20-12-4-3-11-19(20)27(34-29)37-25;/h1-16H;/q-2;+2	[Cu++].[N-]1\C2=N/C3=N/C(=N\C4=C5C=CC=CC5=C([N-]4)\N=C4/N=C(/N=C1/C1=C2C=CC=C1)C1=C4C=CC=C1)/C1=C3C=CC=C1	C32 H16 Cu N8	575.079		10482-39-0, 11097-56-6, 11129-84-3, 12767-67-8, 34567-54-9, 37223-81-7, 39378-75-1, 39473-10-4, 51331-32-9, 53028-77-6, 53802-06-5, 55819-49-3, 57425-52-2, 57916-96-8, 59518-91-1, 59966-88-0, 60880-51-5, 60937-79-3, 61489-66-5, 61489-77-8, 61537-10-8, 64333-57-9, 66121-19-5, 69431-77-2, 78170-27-1, 78413-59-9, 85255-95-4, 85256-77-5, 90452-20-3, 92909-14-3, 95660-31-4, 95917-74-1, 96024-35-0, 104…	Antistatic Agent, Colorant, Crosslinking Agent, Filler, Intermediates, Light Stabilizer, Other Processing Aids	ABS, HDPE, LDPE, Other - Thermoplastic, PA, PC, PET, PP, PS, PUR, PVC	Agriculture, Automotive, Building & Construction, Electrical and Electronic Equipment, Food-contact plastics, Household items, furniture and other, Hygiene and Medical items, Packaging, Textiles, Toys	1	16	Canada, China, EU, Japan, Malaysia, Mexico, Nordic Countries, OECD, Philippines, Russia, South Korea, Taiwan, Thailand, Turkey, United States, Vietnam	100000	1000	100000	1000	200000		1					0	0	0	0	0	1	0		1	1	1	high	1	EU Toys directive	USA Food Contact Materials Positive List (GRAS), Japan Food Contact Materials Postiive List	1	0	1	1
729	'14807-96-6	Talc (Mg3H2(SiO3)4)				H2 O3 Si . 3/4 Mg			8043-56-9, 11119-41-8, 12420-12-1, 37232-12-5, 99638-63-8, 110540-41-5, 184973-42-0, 1170673-66-1, 1385633-70-4, 2403462-24-6	Blowing Agent, Catalyst, Colorant, Crosslinking Agent, Filler, Flame Retardant, Intermediates, Light Stabilizer, Lubricant, Nucleating Agent, Odor Agent, Other Processing Aids, Plasticizer	HDPE, LDPE, Other - Thermoplastic, PA, PET, PP, PS, PVC	Agriculture, Automotive, Building & Construction, Electrical and Electronic Equipment, Food-contact plastics, Household items, furniture and other, Hygiene and Medical items, Packaging, Textiles, Toys	1	15	Canada, China, EU, Malaysia, Mexico, Nordic Countries, OECD, Philippines, Russia, South Korea, Taiwan, Thailand, Turkey, United States, Vietnam	10000	100000	100000	1000	110000		1					1	1	0	0	1	0	0		1	2	1	high	1	Korea REACH Restriction	EU Food Contact Materials Positive List, USA Food Contact Materials Positive List (GRAS), Japan Food Contact Materials Postiive List	1	1	1	1
731	'14901-07-6	3-Buten-2-one, 4-(2,6,6-trimethyl-1-cyclohexen-1-yl)-	PSQYTAPXSHCGMF-UHFFFAOYSA-N	InChI=1S/C13H20O/c1-10-6-5-9-13(3,4)12(10)8-7-11(2)14/h7-8H,5-6,9H2,1-4H3	CC(=O)C=CC1=C(C)CCCC1(C)C	C13 H20 O	192.151			Odor Agent			0	14	Canada, China, EU, Japan, New Zealand, Nordic Countries, OECD, Philippines, Russia, South Korea, Taiwan, Turkey, United States, Vietnam	100	1	1000	1000	1100		1					0	0	0	0	0	1	1		1	1	1	high	0		USA Food Contact Materials Positive List (GRAS)	1	0	1	0
734	'151-21-3	Sulfuric acid monododecyl ester sodium salt (1:1)	DBMJMQXJHONAFJ-UHFFFAOYSA-M	InChI=1S/C12H26O4S.Na/c1-2-3-4-5-6-7-8-9-10-11-12-16-17(13,14)15;/h2-12H2,1H3,(H,13,14,15);/q;+1/p-1	[Na+].CCCCCCCCCCCCOS([O-])(=O)=O	C12 H26 O4 S . Na	288.137		1334-67-4, 1335-72-4, 8012-56-4, 8048-56-4, 12738-53-3, 12765-21-8, 39384-36-6, 51222-39-0, 57176-54-2, 58640-35-0, 61711-39-5, 64441-33-4, 74433-77-5, 111726-87-5, 121481-64-9, 129203-37-8, 145269-44-9, 152155-52-7, 156108-01-9, 172826-72-1, 191490-40-1, 210297-21-5, 237743-45-2, 303179-49-9, 877454-24-5, 952055-37-7, 952092-90-9, 1000201-72-8, 1000201-73-9, 1883428-81-6, 2326507-32-6	Biocide, Blowing Agent, Colorant, Filler, Heat Stabilizer, Other Processing Aids, Plasticizer, Viscosity Modifier		Agriculture, Automotive, Building & Construction, Electrical and Electronic Equipment, Food-contact plastics, Household items, furniture and other, Packaging, Textiles, Toys	1	16	Canada, China, EU, Japan, Malaysia, Mexico, Nordic Countries, OECD, Philippines, Russia, South Korea, Taiwan, Thailand, Turkey, United States, Vietnam	10000	10000	100000	1000	110000		1					0	0	0	0	0.5	1	1		1	1.5	1	high	0		USA Food Contact Materials Positive List (GRAS), Japan Food Contact Materials Postiive List	1	0	1	1
741	'16219-75-3	Bicyclo[2.2.1]hept-2-ene, 5-ethylidene-	OJOWICOBYCXEKR-UHFFFAOYSA-N	InChI=1/C9H12/c1-2-8-5-7-3-4-9(8)6-7/h2-4,7,9H,5-6H2,1H3	CC=C1CC2CC1C=C2	C9 H12	120.094		59006-74-5, 62181-74-2, 1135584-95-0	Intermediates, Monomer	Other - Rubber	Automotive, Food-contact plastics, Packaging	1	13	China, EU, Japan, Mexico, Nordic Countries, OECD, Philippines, Russia, South Korea, Taiwan, Thailand, United States, Vietnam	100000	0	100000	1000	200000		1					1	0	0	1	0.5	0.5	0		1	2	1	high	0		EU Food Contact Materials Positive List, USA Food Contact Materials Positive List (GRAS)	1	1	1	0
745	'167078-06-0	Fatty acids, C12-21 and C18-unsatd., 2,2,6,6-tetramethyl-4-piperidinyl esters				Unspecified				Colorant, Light Stabilizer, Other Processing Aids	ABS, HDPE, LDPE, Other - Rubber, PA, PP, PUR	Agriculture, Automotive, Building & Construction, Food-contact plastics, Household items, furniture and other, Packaging, Textiles	1	11	Canada, China, EU, New Zealand, Nordic Countries, Philippines, South Korea, Taiwan, Thailand, United States, Vietnam		10	10000		10010		1					0	0	0	0	0	1	0		1	1	1	high	0			0	0	0	0
748	'16941-12-1	Platinate(2-), hexachloro-, hydrogen (1:2), (OC-6-11)-	GBFHNZZOZWQQPA-UHFFFAOYSA-J	InChI=1S/6ClH.Pt/h6*1H;/q;;;;;;+4/p-4	[H+].[H+].[Cl-].[Cl-].[Cl-].[Cl-].[Cl-].[Cl-].[Pt+4]	Cl6 Pt . 2 H	406.794		1335-29-1, 60322-59-0, 60605-43-8, 70227-39-3, 97301-98-9, 98032-39-4, 110972-89-9, 127521-16-8, 131620-42-3, 140889-50-5, 143337-19-3, 148880-59-5, 1431865-84-7	Other Processing Aids		Automotive, Building & Construction, Electrical and Electronic Equipment	0	12	Canada, China, EU, Japan, Mexico, Nordic Countries, Philippines, Russia, South Korea, Taiwan, United States, Vietnam	1000	0	1000		2000		1					0.5	0	0	0.5	1	1	1		1	2.5	1	high	1	EU Toys directive		0	0	0	0
749	'17194-00-2	Barium hydroxide (Ba(OH)2)	RQPZNWPYLFFXCP-UHFFFAOYSA-L	InChI=1S/Ba.2H2O/h;2*1H2/q+2;;/p-2	[OH-].[OH-].[Ba++]	Ba H2 O2	171.911		1304-17-2	Colorant, Filler, Intermediates, Lubricant, Other Processing Aids		Automotive, Food-contact plastics, Packaging	1	15	Canada, China, EU, Japan, Mexico, Nordic Countries, OECD, Philippines, Russia, South Korea, Taiwan, Thailand, Turkey, United States, Vietnam	100000	100	10000	1000	110000		1					0	0	0	0	1	0	0		1	1	1	high	1	EU Toys directive	EU Food Contact Materials Positive List, USA Food Contact Materials Positive List (GRAS)	1	1	1	0
751	'17796-82-6	1H-Isoindole-1,3(2H)-dione, 2-(cyclohexylthio)-	UEZWYKZHXASYJN-UHFFFAOYSA-N	InChI=1S/C14H15NO2S/c16-13-11-8-4-5-9-12(11)14(17)15(13)18-10-6-2-1-3-7-10/h4-5,8-10H,1-3,6-7H2	O=C1N(SC2CCCCC2)C(=O)C2=C1C=CC=C2	C14 H15 N O2 S	261.082		866259-75-8	Colorant, Crosslinking Agent, Filler, Other Processing Aids		Automotive, Building & Construction, Household items, furniture and other, Textiles	0	16	Canada, China, EU, Japan, Malaysia, Mexico, New Zealand, Nordic Countries, OECD, Philippines, South Korea, Taiwan, Thailand, Turkey, United States, Vietnam	10000	10	10000	1000	20000		1					0	0	0	0	0.5	1	0		1	1.5	1	high	0			0	0	0	0
761	'2050-08-0	Benzoic acid, 2-hydroxy-, pentyl ester	RANVDUNFZBMTBK-UHFFFAOYSA-N	InChI=1S/C12H16O3/c1-2-3-6-9-15-12(14)10-7-4-5-8-11(10)13/h4-5,7-8,13H,2-3,6,9H2,1H3	CCCCCOC(=O)C1=C(O)C=CC=C1	C12 H16 O3	208.11			Odor Agent, Other Processing Aids		Automotive, Building & Construction, Electrical and Electronic Equipment, Textiles	0	12	Canada, China, EU, Japan, Nordic Countries, Philippines, South Korea, Taiwan, Thailand, Turkey, United States, Vietnam	1000	1	1000		2000		1					0	0	0	0	0	1	0		1	1	1	high	0		USA Food Contact Materials Positive List (GRAS)	1	0	1	0
764	'2162-74-5	Benzenamine, N,N'-methanetetraylbis[2,6-bis(1-methylethyl)-	XLDBGFGREOMWSL-UHFFFAOYSA-N	InChI=1S/C25H34N2/c1-16(2)20-11-9-12-21(17(3)4)24(20)26-15-27-25-22(18(5)6)13-10-14-23(25)19(7)8/h9-14,16-19H,1-8H3	CC(C)C1=CC=CC(C(C)C)=C1N=C=NC1=C(C=CC=C1C(C)C)C(C)C	C25 H34 N2	362.272		85800-79-9, 1009809-93-1, 1702284-28-3, 1801605-64-0, 2364331-99-5	Heat Stabilizer, Light Stabilizer, Monomer, Other Processing Aids, Plasticizer	Other - Thermoplastic, PET	Electrical and Electronic Equipment, Food-contact plastics, Packaging	1	12	Canada, China, EU, Japan, Nordic Countries, Philippines, Russia, South Korea, Taiwan, Thailand, United States, Vietnam	10000	100	-1		10000		1					1	0	0	1	1	0	0		1	2	1	high	0		EU Food Contact Materials Positive List, Japan Food Contact Materials Postiive List	1	1	0	1
771	'2455-24-5	2-Propenoic acid, 2-methyl-, (tetrahydro-2-furanyl)methyl ester	LCXXNKZQVOXMEH-UHFFFAOYSA-N	InChI=1/C9H14O3/c1-7(2)9(10)12-6-8-4-3-5-11-8/h8H,1,3-6H2,2H3	CC(=C)C(=O)OCC1CCCO1	C9 H14 O3	170.094		64461-15-0, 125166-24-7, 160211-89-2	Initiator, Intermediates, Monomer, Other Processing Aids		Automotive, Building & Construction, Electrical and Electronic Equipment	0	11	Canada, China, EU, Japan, Mexico, New Zealand, Nordic Countries, Philippines, South Korea, Taiwan, United States	1000	10	1000		2000		1					1	0	0	1	0	0	0		1	1	1	high	0			0	0	0	0
775	'25103-58-6	tert-Dodecanethiol	YAJYJWXEWKRTPO-UHFFFAOYSA-N	InChI=1S/C12H26S/c1-9(2)10(3,4)11(5,6)12(7,8)13/h9,13H,1-8H3	CC(C)C(C)(C)C(C)(C)C(C)(C)S	C12 H26 S	202.176		90501-34-1, 119147-91-0, 1971112-70-5	Intermediates, Lubricant, Other Processing Aids	HIPS, PS	Automotive, Building & Construction, Food-contact plastics, Packaging, Textiles	1	15	Canada, China, EU, Malaysia, Mexico, Nordic Countries, OECD, Philippines, Russia, South Korea, Taiwan, Thailand, Turkey, United States, Vietnam	100000	10	100000	1000	200000	0	0	0	0	0	0	0	0	0	0	1	1	0		1	2	1	high	0		USA Food Contact Materials Positive List (GRAS), Japan Food Contact Materials Postiive List	1	0	1	1
779	'25339-17-7	Isodecanol				C10 H22 O			12758-52-0, 50973-08-5	Plasticizer			0	14	Canada, China, EU, Japan, Malaysia, Mexico, New Zealand, Nordic Countries, OECD, Philippines, South Korea, Taiwan, United States, Vietnam		100	10000	1000	10100		1					0	0	0	0	0.5	1	0		1	1.5	1	high	0		Japan Food Contact Materials Postiive List	1	0	0	1
780	'25448-25-3	Phosphorous acid, triisodecyl ester				C30 H63 O3 P				Antioxidant, Colorant, Heat Stabilizer, Light Stabilizer, Other Processing Aids	ABS, HDPE, LDPE, PET, PP, PUR, PVC	Building & Construction, Electrical and Electronic Equipment, Food-contact plastics, Household items, furniture and other, Packaging, Textiles, Toys	1	13	Canada, China, EU, Japan, Nordic Countries, OECD, Philippines, South Korea, Taiwan, Thailand, Turkey, United States, Vietnam	1000	10	10000	1000	11000		1					1	0	1	1	0	0	0		1	2	1	high	0		Japan Food Contact Materials Postiive List	1	0	0	1
782	'25550-98-5	Phosphorous acid, diisodecyl phenyl ester				C26 H47 O3 P			28930-03-2, 174594-30-0	Antioxidant, Colorant, Heat Stabilizer, Intermediates, Light Stabilizer, Lubricant, Other Processing Aids	ABS, PC, PET, PUR, PVC	Building & Construction, Electrical and Electronic Equipment, Food-contact plastics, Household items, furniture and other, Packaging, Textiles, Toys	1	15	Canada, China, EU, Japan, New Zealand, Nordic Countries, OECD, Philippines, Russia, South Korea, Taiwan, Thailand, Turkey, United States, Vietnam	10000	10	10000	1000	20000		1					0	0	0	0	0	1	0		1	1	1	high	0			0	0	0	0
784	'26140-60-3	Terphenyl			*C1=CC=CC=C1.C1=CC=C(C=C1)C1=CC=CC=C1 |c:3,5,7,9,11,16,18,t:1,14,m:0:11.12.7|	C18 H14			1323-04-2	Filler, Intermediates, Other Processing Aids		Building & Construction, Electrical and Electronic Equipment, Food-contact plastics, Packaging	1	13	Canada, China, EU, Japan, Mexico, Nordic Countries, OECD, Philippines, Russia, South Korea, Taiwan, United States, Vietnam		10	-1	1000	1000		1					0	0	0	0	0	1	0		1	1	1	high	0		USA Food Contact Materials Positive List (GRAS)	1	0	1	0
785	'26544-23-0	Phosphorous acid, isodecyl diphenyl ester				C22 H31 O3 P			30556-19-5	Antioxidant, Colorant, Heat Stabilizer, Intermediates, Light Stabilizer, Lubricant, Other Processing Aids	ABS, PC, PET, PUR, PVC	Building & Construction, Electrical and Electronic Equipment, Food-contact plastics, Household items, furniture and other, Packaging, Textiles, Toys	1	14	Canada, China, EU, Japan, Nordic Countries, OECD, Philippines, Russia, South Korea, Taiwan, Thailand, Turkey, United States, Vietnam	10000	10	10000	1000	20000		1					0	0	0	0	0.5	1	0		1	1.5	1	high	0		Japan Food Contact Materials Postiive List	1	0	0	1
787	'26748-41-4	Neodecaneperoxoic acid, 1,1-dimethylethyl ester				C14 H28 O3			53712-43-9	Antioxidant, Catalyst, Crosslinking Agent, Initiator, Other Processing Aids, Plasticizer	ABS, LDPE, PET, PVC	Automotive, Building & Construction, Food-contact plastics, Packaging	1	15	Canada, China, EU, Malaysia, Mexico, New Zealand, Nordic Countries, OECD, Philippines, Russia, South Korea, Taiwan, Thailand, United States, Vietnam	1000	1000	10000	1000	11000		1					0	0	0	0	0	1	0		1	1	1	high	0			0	0	0	0
788	'26761-45-5	Neodecanoic acid, 2-oxiranylmethyl ester				C13 H24 O3				Colorant, Crosslinking Agent, Filler, Intermediates, Monomer, Other Processing Aids		Automotive, Building & Construction, Electrical and Electronic Equipment, Household items, furniture and other, Textiles, Toys	0	16	Canada, China, EU, Malaysia, Mexico, New Zealand, Nordic Countries, OECD, Philippines, Russia, South Korea, Taiwan, Thailand, Turkey, United States, Vietnam	100000	1000	10000	1000	110000		1					1	1	0.5	0	0	0	0		1	1.5	1	high	0		Japan Food Contact Materials Postiive List	1	0	0	1
789	'26864-37-9	8-Oxa-3,5-dithia-4-stannatetradecanoic acid, 4-butyl-10-ethyl-4-[[2-[(2-ethylhexyl)oxy]-2-oxoethyl]thio]-7-oxo-, 2-ethylhexyl ester	HHDNFMPQAVDNGA-UHFFFAOYSA-K	InChI=1/3C10H20O2S.C4H9.Sn/c3*1-3-5-6-9(4-2)7-12-10(11)8-13;1-3-4-2;/h3*9,13H,3-8H2,1-2H3;1,3-4H2,2H3;/q;;;;+3/p-3	CCCCC(CC)COC(=O)CS[Sn](CCCC)(SCC(=O)OCC(CC)CCCC)SCC(=O)OCC(CC)CCCC	C34 H66 O6 S3 Sn	786.304		40968-77-2	Filler, Heat Stabilizer, Light Stabilizer, Other Processing Aids		Automotive, Building & Construction	0	12	Canada, China, EU, Japan, New Zealand, Nordic Countries, OECD, Philippines, South Korea, Taiwan, United States, Vietnam		10	1000	1000	1010		1					0	0	0	0	0	1	0		1	1	1	high	1	EU Toys directive		0	0	0	0
790	'2687-91-4	2-Pyrrolidinone, 1-ethyl-	ZFPGARUNNKGOBB-UHFFFAOYSA-N	InChI=1S/C6H11NO/c1-2-7-5-3-4-6(7)8/h2-5H2,1H3	CCN1CCCC1=O	C6 H11 N O	113.084			Colorant, Filler, Lubricant, Other Processing Aids		Automotive, Electrical and Electronic Equipment, Household items, furniture and other, Textiles	0	14	Canada, China, EU, Japan, Mexico, Nordic Countries, OECD, Philippines, South Korea, Taiwan, Thailand, Turkey, United States, Vietnam	1000	10	10000	1000	11000	0.5	0.5	0.5	0.5	0.5	0.5	1	0	0	1	0	0	0		1	1	1	high	0			0	0	0	0
791	'2705-87-5	Cyclohexanepropanoic acid, 2-propen-1-yl ester	TWXUTZNBHUWMKJ-UHFFFAOYSA-N	InChI=1S/C12H20O2/c1-2-10-14-12(13)9-8-11-6-4-3-5-7-11/h2,11H,1,3-10H2	C=CCOC(=O)CCC1CCCCC1	C12 H20 O2	196.146			Odor Agent			0	14	Canada, China, EU, Japan, Mexico, New Zealand, Nordic Countries, Philippines, Russia, South Korea, Taiwan, Thailand, United States, Vietnam	1000	1	1000		2000		1					0	0	0	0	0	1	0		1	1	1	high	0		USA Food Contact Materials Positive List (GRAS)	1	0	1	0
792	'27107-89-7	8-Oxa-3,5-dithia-4-stannatetradecanoic acid, 10-ethyl-4-[[2-[(2-ethylhexyl)oxy]-2-oxoethyl]thio]-4-octyl-7-oxo-, 2-ethylhexyl ester	VHKGIWUCVBAITR-UHFFFAOYSA-K	InChI=1/3C10H20O2S.C8H17.Sn/c3*1-3-5-6-9(4-2)7-12-10(11)8-13;1-3-5-7-8-6-4-2;/h3*9,13H,3-8H2,1-2H3;1,3-8H2,2H3;/q;;;;+3/p-3	CCCCCCCC[Sn](SCC(=O)OCC(CC)CCCC)(SCC(=O)OCC(CC)CCCC)SCC(=O)OCC(CC)CCCC	C38 H74 O6 S3 Sn	842.367		64685-80-9	Heat Stabilizer, Light Stabilizer, Other Processing Aids	PVC	Food-contact plastics, Packaging	1	13	Canada, China, EU, Japan, New Zealand, Nordic Countries, OECD, Philippines, South Korea, Taiwan, Turkey, United States, Vietnam	10000	10	-1	1000	10000		1					1	0	0	1	1	1	0		1	3	1	high	1	EU Toys directive	EU Food Contact Materials Positive List, Japan Food Contact Materials Postiive List	1	1	0	1
801	'29570-58-9	2-Propenoic acid, 1,1'-[2-[[3-[(1-oxo-2-propen-1-yl)oxy]-2,2-bis[[(1-oxo-2-propen-1-yl)oxy]methyl]propoxy]methyl]-2-[[(1-oxo-2-propen-1-yl)oxy]methyl]-1,3-propanediyl] ester	MPIAGWXWVAHQBB-UHFFFAOYSA-N	InChI=1S/C28H34O13/c1-7-21(29)36-15-27(16-37-22(30)8-2,17-38-23(31)9-3)13-35-14-28(18-39-24(32)10-4,19-40-25(33)11-5)20-41-26(34)12-6/h7-12H,1-6,13-20H2	C=CC(=O)OCC(COCC(COC(=O)C=C)(COC(=O)C=C)COC(=O)C=C)(COC(=O)C=C)COC(=O)C=C	C28 H34 O13	578.2		112477-44-8, 122269-28-7, 141061-94-1, 154303-15-8, 161628-67-7, 163045-95-2, 169047-29-4, 296780-19-3, 328528-60-5, 346619-55-4, 348098-46-4, 848889-71-4, 1202805-29-5, 1832410-47-5, 2068795-63-9, 2173241-69-3	Colorant, Monomer			0	12	China, EU, Japan, Malaysia, New Zealand, Nordic Countries, OECD, Philippines, South Korea, Taiwan, United States, Vietnam		10	1000	1000	1010		1					1	0	0	1	0	0	0		1	1	1	high	0		Japan Food Contact Materials Postiive List	1	0	0	1
803	'3006-82-4	Hexaneperoxoic acid, 2-ethyl-, 1,1-dimethylethyl ester	WYKYCHHWIJXDAO-UHFFFAOYSA-N	InChI=1/C12H24O3/c1-6-8-9-10(7-2)11(13)14-15-12(3,4)5/h10H,6-9H2,1-5H3	CCCCC(CC)C(=O)OOC(C)(C)C	C12 H24 O3	216.173			Antioxidant, Catalyst, Colorant, Crosslinking Agent, Filler, Initiator, Other Processing Aids, Plasticizer	PET	Agriculture, Automotive, Building & Construction, Food-contact plastics, Household items, furniture and other, Packaging, Textiles	1	15	Canada, China, EU, Japan, Malaysia, Nordic Countries, OECD, Philippines, Russia, South Korea, Taiwan, Thailand, Turkey, United States, Vietnam	10000	100	10000	1000	20000		1					1	0	0	1	0	1	0		1	2	1	high	0			0	0	0	0
809	'30525-89-4	Paraformaldehyde				(C H2 O)x			53026-80-5, 104512-58-5, 104512-63-2, 104814-22-4, 1417997-02-4	Biocide, Catalyst, Colorant, Crosslinking Agent, Filler, Intermediates, Other Processing Aids, Plasticizer		Building & Construction, Food-contact plastics, Household items, furniture and other, Packaging, Textiles	1	16	Canada, China, EU, Japan, Malaysia, Mexico, Nordic Countries, OECD, Philippines, Russia, South Korea, Switzerland, Taiwan, Thailand, United States, Vietnam		1000	100000	1000	101000		1					1	1	0.5	0	0	0.5	1		1	2	1	high	1	Korea REACH Authorisation	USA Food Contact Materials Positive List (GRAS), Japan Food Contact Materials Postiive List	1	0	1	1
816	'32388-55-9	Ethanone, 1-[(3R,3aR,7R,8aS)-2,3,4,7,8,8a-hexahydro-3,6,8,8-tetramethyl-1H-3a,7-methanoazulen-5-yl]-	YBUIAJZFOGJGLJ-SWRJLBSHSA-N	InChI=1S/C17H26O/c1-10-6-7-15-16(4,5)14-9-17(10,15)8-13(11(14)2)12(3)18/h10,14-15H,6-9H2,1-5H3/t10-,14+,15+,17+/m1/s1	C[C@@H]1CC[C@H]2C(C)(C)[C@H]3C[C@@]12CC(C(C)=O)=C3C	C17 H26 O	246.198		126239-49-4	Odor Agent		Automotive, Building & Construction, Electrical and Electronic Equipment, Household items, furniture and other, Textiles	0	14	Canada, China, EU, Japan, Mexico, New Zealand, Nordic Countries, Philippines, South Korea, Taiwan, Thailand, Turkey, United States, Vietnam	10000	1	1000		11000		1					0	0	0	0	0	1	0		1	1	1	high	0			0	0	0	0
818	'3290-92-4	2-Propenoic acid, 2-methyl-, 1,1'-[2-ethyl-2-[[(2-methyl-1-oxo-2-propen-1-yl)oxy]methyl]-1,3-propanediyl] ester	OKKRPWIIYQTPQF-UHFFFAOYSA-N	InChI=1S/C18H26O6/c1-8-18(9-22-15(19)12(2)3,10-23-16(20)13(4)5)11-24-17(21)14(6)7/h2,4,6,8-11H2,1,3,5,7H3	CCC(COC(=O)C(C)=C)(COC(=O)C(C)=C)COC(=O)C(C)=C	C18 H26 O6	338.173		12656-03-0, 27441-62-9, 37271-14-0, 38886-95-2, 39301-32-1, 66451-56-7, 73784-89-1, 96082-02-9, 102068-89-3, 107711-83-1, 107846-19-5, 108727-84-0, 109633-39-8, 112291-39-1, 117456-07-2, 118520-52-8, 177345-96-9, 186262-44-2, 1418179-57-3, 1841444-01-6	Colorant, Crosslinking Agent, Initiator, Intermediates, Monomer, Other Processing Aids	Other - Thermoplastic	Automotive, Building & Construction, Electrical and Electronic Equipment, Food-contact plastics, Packaging	1	14	Canada, China, EU, Japan, New Zealand, Nordic Countries, OECD, Philippines, Russia, South Korea, Taiwan, Thailand, United States, Vietnam	10000	100	10000	1000	20000		1					1	0	0	1	0	0	0		1	1	1	high	0		EU Food Contact Materials Positive List, Japan Food Contact Materials Postiive List	1	1	0	1
819	'3296-90-0	1,3-Propanediol, 2,2-bis(bromomethyl)-	CHUGKEQJSLOLHL-UHFFFAOYSA-N	InChI=1S/C5H10Br2O2/c6-1-5(2-7,3-8)4-9/h8-9H,1-4H2	OCC(CO)(CBr)CBr	C5 H10 Br2 O2	259.905			Flame Retardant, Intermediates	Other - Rubber, PET, PUR		0	12	Canada, China, EU, Japan, New Zealand, Nordic Countries, Russia, South Korea, Taiwan, Thailand, United States, Vietnam	1000	0	10000		11000		1					1	1	1	0.5	0.5	0	0		1	3	1	high	1	USA - California Proposition 65		0	0	0	0
825	'35541-81-2	1,4-Cyclohexanedimethanol, 1,4-dibenzoate	CVPZXHCZKMFVOZ-UHFFFAOYSA-N	InChI=1S/C22H24O4/c23-21(19-7-3-1-4-8-19)25-15-17-11-13-18(14-12-17)16-26-22(24)20-9-5-2-6-10-20/h1-10,17-18H,11-16H2	O=C(OCC1CCC(COC(=O)C2=CC=CC=C2)CC1)C1=CC=CC=C1	C22 H24 O4	352.167			Other Processing Aids, Plasticizer		Food-contact plastics, Packaging	1	11	Canada, China, EU, Japan, New Zealand, Nordic Countries, OECD, Russia, South Korea, Taiwan, United States	-1	0	10000	1000	10000		1					0	0	0	0	0	1	0		1	1	1	high	0		USA Food Contact Materials Positive List (GRAS)	1	0	1	0
829	'36653-82-4	1-Hexadecanol	BXWNKGSJHAJOGX-UHFFFAOYSA-N	InChI=1S/C16H34O/c1-2-3-4-5-6-7-8-9-10-11-12-13-14-15-16-17/h17H,2-16H2,1H3	CCCCCCCCCCCCCCCCO	C16 H34 O	242.261		124-29-8, 8014-51-5, 8023-37-8, 8032-16-4, 8032-17-5, 8032-89-1, 55069-45-9, 1173838-87-3	Biocide, Catalyst, Colorant, Crosslinking Agent, Filler, Initiator, Intermediates, Light Stabilizer, Lubricant, Monomer, Odor Agent, Other Processing Aids, Plasticizer, Viscosity Modifier	PVC	Automotive, Building & Construction, Electrical and Electronic Equipment, Food-contact plastics, Household items, furniture and other, Packaging, Textiles, Toys	1	16	Canada, China, EU, Japan, Malaysia, Mexico, Nordic Countries, OECD, Philippines, Russia, South Korea, Taiwan, Thailand, Turkey, United States, Vietnam	1000000	100	100000	1000	1100000		1					0	0	0	0	0	1	0		1	1	1	high	0		EU Food Contact Materials Positive List, USA Food Contact Materials Positive List (GRAS), Japan Food Contact Materials Postiive List	1	1	1	1
833	'38640-62-9	Naphthalene, bis(1-methylethyl)-				C16 H20				Colorant, Crosslinking Agent, Filler, Other Processing Aids, Plasticizer		Building & Construction, Electrical and Electronic Equipment, Textiles	0	15	Canada, China, EU, Japan, Malaysia, New Zealand, Nordic Countries, OECD, Philippines, Russia, South Korea, Taiwan, Turkey, United States, Vietnam	10000	100	1000	1000	11000	0.5	0.5	0.5	0.5	0.5	0.5	0	0	0	0	0	1	0		1	1	1	high	0		Japan Food Contact Materials Postiive List	1	0	0	1
853	'4712-55-4	Phosphonic acid, diphenyl ester	OGBPILLJZSJJRC-UHFFFAOYSA-N	InChI=1S/C12H11O3P/c13-16(14-11-7-3-1-4-8-11)15-12-9-5-2-6-10-12/h1-10,16H	O=P(OC1=CC=CC=C1)OC1=CC=CC=C1	C12 H11 O3 P	234.045			Antioxidant, Catalyst, Crosslinking Agent, Initiator, Light Stabilizer, Other Processing Aids	HDPE, LDPE, PP, PVC	Building & Construction, Electrical and Electronic Equipment, Food-contact plastics, Household items, furniture and other, Packaging, Textiles, Toys	1	12	Canada, China, EU, Japan, Mexico, New Zealand, Nordic Countries, Philippines, South Korea, Taiwan, United States, Vietnam	100	10	1000		1100		1					1	0	1	1	1	1	0		1	4	1	high	0			0	0	0	0
854	'471-34-1	Carbonic acid calcium salt (1:1)	VTYYLEPIZMXCLO-UHFFFAOYSA-L	InChI=1S/CH2O3.Ca/c2-1(3)4;/h(H2,2,3,4);/q;+2/p-2	[Ca++].[O-]C([O-])=O	C H2 O3 . Ca	99.9473	15187-75-4	39454-55-2, 60083-79-6, 63660-97-9, 71060-88-3, 72608-12-9, 114453-69-9, 137803-94-2, 146358-95-4, 148092-93-7, 166516-01-4, 172307-27-6, 180616-31-3, 197809-38-4, 198352-33-9, 251358-28-8, 459411-10-0, 878759-26-3, 1312764-88-7, 1352815-51-0, 1437084-75-7, 1641572-50-0, 1883798-64-8, 2222732-78-5	Antioxidant, Biocide, Blowing Agent, Catalyst, Colorant, Crosslinking Agent, Filler, Flame Retardant, Impact Modifier, Intermediates, Light Stabilizer, Lubricant, Nucleating Agent, Odor Agent, Other Processing Aids, Plasticizer, Viscosity Modifier	ABS, HDPE, LDPE, Other - Rubber, Other - Thermoplastic, PA, PC, PET, PP, PS, PUR, PVC	Agriculture, Automotive, Building & Construction, Electrical and Electronic Equipment, Food-contact plastics, Household items, furniture and other, Hygiene and Medical items, Packaging, Textiles, Toys	1	16	Canada, China, EU, Japan, Malaysia, Mexico, Nordic Countries, OECD, Philippines, Russia, South Korea, Taiwan, Thailand, Turkey, United States, Vietnam	10000000	1000000	100000000	1000	110000000		1					0	0	0	0	1	0	0		1	1	1	high	0		USA Food Contact Materials Positive List (GRAS), Japan Food Contact Materials Postiive List	1	0	1	1
859	'4940-11-8	4H-Pyran-4-one, 2-ethyl-3-hydroxy-	YIKYNHJUKRTCJL-UHFFFAOYSA-N	InChI=1S/C7H8O3/c1-2-6-7(9)5(8)3-4-10-6/h3-4,9H,2H2,1H3	CCC1=C(O)C(=O)C=CO1	C7 H8 O3	140.047			Odor Agent			0	13	Canada, China, EU, Japan, Mexico, Nordic Countries, Philippines, Russia, South Korea, Taiwan, Thailand, United States, Vietnam	1000	0	1000		2000		1					0	0	0	0	0	1	0		1	1	1	high	0		USA Food Contact Materials Positive List (GRAS)	1	0	1	0
862	'50-21-5	Propanoic acid, 2-hydroxy-	JVTAAEKCZFNVCJ-UHFFFAOYSA-N	InChI=1/C3H6O3/c1-2(4)3(5)6/h2,4H,1H3,(H,5,6)	CC(O)C(O)=O	C3 H6 O3	90.0317	849585-22-4	152-36-3, 598-82-3, 1334714-39-4	Antioxidant, Biocide, Colorant, Filler, Intermediates, Lubricant, Monomer, Odor Agent, Other Processing Aids	Other - Bioplastic	Agriculture, Automotive, Building & Construction, Electrical and Electronic Equipment, Food-contact plastics, Household items, furniture and other, Packaging, Textiles, Toys	1	17	Canada, China, EU, Japan, Malaysia, Mexico, New Zealand, Nordic Countries, OECD, Philippines, Russia, South Korea, Taiwan, Thailand, Turkey, United States, Vietnam	1000	1000	1000000	1000	1001000		1					0	0	0	0	0	1	0		1	1	1	high	0		EU Food Contact Materials Positive List, USA Food Contact Materials Positive List (GRAS), Japan Food Contact Materials Postiive List	1	1	1	1
865	'51274-00-1	C.I. Pigment Yellow 42				Unspecified			1342-51-4, 12000-32-7, 12001-03-5, 50641-37-7, 51109-85-4, 53028-10-7, 94809-98-0, 99241-66-4, 105478-30-6, 131462-81-2, 147625-38-5, 164714-83-4, 182761-12-2, 185464-57-7, 293726-56-4, 622368-46-1, 934248-40-5, 1426820-85-0	Biocide, Colorant, Crosslinking Agent, Filler, Intermediates, Lubricant, Odor Agent, Other Processing Aids	ABS, HDPE, LDPE, Other - Thermoplastic, PA, PC, PET, PP, PS, PUR, PVC	Agriculture, Automotive, Building & Construction, Electrical and Electronic Equipment, Food-contact plastics, Household items, furniture and other, Packaging, Textiles, Toys	1	14	Canada, China, EU, Malaysia, Mexico, Nordic Countries, OECD, Philippines, South Korea, Taiwan, Thailand, Turkey, United States, Vietnam	100000	1000	100000	1000	200000		1					0	0	0	0	1	0	0		1	1	1	high	0			0	0	0	0
866	'513-35-9	2-Butene, 2-methyl-	BKOOMYPCSUNDGP-UHFFFAOYSA-N	InChI=1S/C5H10/c1-4-5(2)3/h4H,1-3H3	CC=C(C)C	C5 H10	70.0783			Intermediates, Plasticizer		Agriculture, Textiles	0	13	Canada, China, EU, Japan, Mexico, Nordic Countries, OECD, Philippines, South Korea, Taiwan, Thailand, United States, Vietnam	10000	0	1000000	1000	1010000		1					1	1	0.5	0	0	0.5	0		1	2	1	high	0			0	0	0	0
875	'540-84-1	Pentane, 2,2,4-trimethyl-	NHTMVDHEPJAVLT-UHFFFAOYSA-N	InChI=1S/C8H18/c1-7(2)6-8(3,4)5/h7H,6H2,1-5H3	CC(C)CC(C)(C)C	C8 H18	114.141		31921-36-5	Biocide, Colorant, Filler, Lubricant, Odor Agent, Other Processing Aids	Other - Thermoplastic		0	15	Canada, China, EU, Japan, Malaysia, Mexico, Nordic Countries, OECD, Philippines, South Korea, Taiwan, Thailand, Turkey, United States, Vietnam	100000	100	1000000	1000	1100000		1					0	0	0	0	0	1	0		1	1	1	high	0			0	0	0	0
876	'540-97-6	Cyclohexasiloxane, 2,2,4,4,6,6,8,8,10,10,12,12-dodecamethyl-	IUMSDRXLFWAGNT-UHFFFAOYSA-N	InChI=1S/C12H36O6Si6/c1-19(2)13-20(3,4)15-22(7,8)17-24(11,12)18-23(9,10)16-21(5,6)14-19/h1-12H3	C[Si]1(C)O[Si](C)(C)O[Si](C)(C)O[Si](C)(C)O[Si](C)(C)O[Si](C)(C)O1	C12 H36 O6 Si6	444.113			Lubricant	HDPE, LDPE, PP		0	14	Canada, China, EU, Japan, New Zealand, Nordic Countries, OECD, Philippines, South Korea, Taiwan, Thailand, Turkey, United States, Vietnam	100000	10	100000	1000	200000	1	1	1	1	1	1	0	0	0	0	0	0	0		2	2	1	high	1	EU REACH SVHC		0	0	0	0
878	'5444-75-7	Benzoic acid, 2-ethylhexyl ester	UADWUILHKRXHMM-UHFFFAOYSA-N	InChI=1/C15H22O2/c1-3-5-9-13(4-2)12-17-15(16)14-10-7-6-8-11-14/h6-8,10-11,13H,3-5,9,12H2,1-2H3	CCCCC(CC)COC(=O)C1=CC=CC=C1	C15 H22 O2	234.162		1240324-30-4	Crosslinking Agent, Filler, Other Processing Aids, Plasticizer		Building & Construction, Electrical and Electronic Equipment, Textiles	0	11	Canada, China, EU, Japan, New Zealand, Nordic Countries, OECD, South Korea, Taiwan, United States, Vietnam	1000	10	10000	1000	11000		1					1	0	0	1	0	0	0		1	1	1	high	0		USA Food Contact Materials Positive List (GRAS)	1	0	1	0
883	'54982-83-1	1,4-Dioxacyclohexadecane-5,16-dione	GJJSUPSPZIZYPM-UHFFFAOYSA-N	InChI=1S/C14H24O4/c15-13-9-7-5-3-1-2-4-6-8-10-14(16)18-12-11-17-13/h1-12H2	O=C1CCCCCCCCCCC(=O)OCCO1	C14 H24 O4	256.167		85024-16-4, 91462-24-7	Biocide, Colorant, Filler, Lubricant, Odor Agent, Other Processing Aids		Electrical and Electronic Equipment, Household items, furniture and other, Textiles	0	14	Canada, China, EU, Japan, Mexico, New Zealand, Nordic Countries, Philippines, Russia, South Korea, Taiwan, Thailand, United States, Vietnam	1000	1	1000		2000		1					0	0	0	0	0	1	0		1	1	1	high	0			0	0	0	0
887	'556-67-2	Cyclotetrasiloxane, 2,2,4,4,6,6,8,8-octamethyl-	HMMGMWAXVFQUOA-UHFFFAOYSA-N	InChI=1S/C8H24O4Si4/c1-13(2)9-14(3,4)11-16(7,8)12-15(5,6)10-13/h1-8H3	C[Si]1(C)O[Si](C)(C)O[Si](C)(C)O[Si](C)(C)O1	C8 H24 O4 Si4	296.075		83874-62-8, 104986-37-0, 117563-66-3, 1257661-59-8	Colorant, Crosslinking Agent, Filler, Intermediates, Lubricant, Odor Agent, Other Processing Aids	Other - Rubber	Agriculture, Automotive, Building & Construction, Electrical and Electronic Equipment, Household items, furniture and other, Packaging, Textiles, Toys	0	16	Canada, China, EU, Japan, Malaysia, Mexico, Nordic Countries, OECD, Philippines, Russia, South Korea, Taiwan, Thailand, Turkey, United States, Vietnam	1000000	10	1000000	1000	2000000	1	1	1	1	1	1	0.5	0	0	0.5	0	1	0		3	3.5	1	high	1	EU REACH Restriction, EU REACH SVHC		0	0	0	0
889	'557-04-0	Octadecanoic acid, magnesium salt (2:1)	HQKMJHAJHXVSDF-UHFFFAOYSA-L	InChI=1S/2C18H36O2.Mg/c2*1-2-3-4-5-6-7-8-9-10-11-12-13-14-15-16-17-18(19)20;/h2*2-17H2,1H3,(H,19,20);/q;;+2/p-2	[Mg++].CCCCCCCCCCCCCCCCCC([O-])=O.CCCCCCCCCCCCCCCCCC([O-])=O	C18 H36 O2 . 1/2 Mg	590.512		212132-26-8	Antistatic Agent, Colorant, Crosslinking Agent, Filler, Flame Retardant, Heat Stabilizer, Light Stabilizer, Lubricant, Other Processing Aids	ABS, PS, PVC	Agriculture, Automotive, Building & Construction, Electrical and Electronic Equipment, Food-contact plastics, Household items, furniture and other, Packaging, Textiles, Toys	1	14	Canada, China, EU, Mexico, Nordic Countries, OECD, Philippines, Russia, South Korea, Taiwan, Thailand, Turkey, United States, Vietnam		100	10000	1000	10100		1					0	0	0	0	1	0	0		1	1	1	high	0		USA Food Contact Materials Positive List (GRAS), Japan Food Contact Materials Postiive List	1	0	1	1
890	'557-05-1	Octadecanoic acid, zinc salt (2:1)	XOOUIPVCVHRTMJ-UHFFFAOYSA-L	InChI=1S/2C18H36O2.Zn/c2*1-2-3-4-5-6-7-8-9-10-11-12-13-14-15-16-17-18(19)20;/h2*2-17H2,1H3,(H,19,20);/q;;+2/p-2	[Zn++].CCCCCCCCCCCCCCCCCC([O-])=O.CCCCCCCCCCCCCCCCCC([O-])=O	C18 H36 O2 . 1/2 Zn	630.457		8028-87-3, 72535-55-8, 256482-37-8	Antioxidant, Antistatic Agent, Colorant, Crosslinking Agent, Filler, Heat Stabilizer, Intermediates, Light Stabilizer, Lubricant, Other Processing Aids, Plasticizer, Viscosity Modifier	ABS, HDPE, LDPE, Other - Rubber, Other - Thermoplastic, PA, PET, PP, PS, PUR, PVC	Agriculture, Building & Construction, Electrical and Electronic Equipment, Food-contact plastics, Household items, furniture and other, Hygiene and Medical items, Packaging, Textiles, Toys	1	15	Canada, China, EU, Malaysia, Mexico, Nordic Countries, OECD, Philippines, Russia, South Korea, Taiwan, Thailand, Turkey, United States, Vietnam	1000	1000	100000	1000	101000		1					0	0	0	0	0	1	0		1	1	1	high	1	EU Toys directive	USA Food Contact Materials Positive List (GRAS), Japan Food Contact Materials Postiive List	1	0	1	1
892	'56803-37-3	Phosphoric acid, (1,1-dimethylethyl)phenyl diphenyl ester			CC(C)(C)*.O=P(OC1=CC=CC=C1)(OC1=CC=CC=C1)OC1=CC=CC=C1 |c:9,11,17,19,25,27,t:7,15,23,lp:5:2,7:2,14:2,21:2,m:4:11.12.13|	C22 H23 O4 P				Flame Retardant, Lubricant, Other Processing Aids, Plasticizer	PUR, PVC	Automotive, Packaging	0	10	Canada, China, EU, New Zealand, Nordic Countries, Philippines, South Korea, Taiwan, United States, Vietnam		100	10000		10100		1					0	0	0	0	0.5	1	0		1	1.5	1	high	0			0	0	0	0
893	'56-81-5	1,2,3-Propanetriol	PEDCQBHIVMGVHV-UHFFFAOYSA-N	InChI=1S/C3H8O3/c4-1-3(6)2-5/h3-6H,1-2H2	OCC(O)CO	C3 H8 O3	92.0473	30918-77-5	8013-25-0, 29796-42-7, 30049-52-6, 37228-54-9, 75398-78-6, 78630-16-7, 1400594-62-8, 1422250-43-8, 1629856-20-7	Antistatic Agent, Biocide, Catalyst, Colorant, Crosslinking Agent, Filler, Initiator, Intermediates, Light Stabilizer, Lubricant, Monomer, Odor Agent, Other Processing Aids, Plasticizer	PUR, PVC	Agriculture, Automotive, Building & Construction, Electrical and Electronic Equipment, Food-contact plastics, Household items, furniture and other, Hygiene and Medical items, Packaging, Textiles, Toys	1	17	Canada, China, EU, Japan, Malaysia, Mexico, New Zealand, Nordic Countries, OECD, Philippines, Russia, South Korea, Taiwan, Thailand, Turkey, United States, Vietnam	10000	10000	10000000	1000	10010000		1					0	0	0	0	1	0	0		1	1	1	high	0		EU Food Contact Materials Positive List, USA Food Contact Materials Positive List (GRAS), Japan Food Contact Materials Postiive List	1	1	1	1
900	'57-55-6	1,2-Propanediol	DNIAPMSPPWPWGF-UHFFFAOYSA-N	InChI=1/C3H8O2/c1-3(5)2-4/h3-5H,2H2,1H3	CC(O)CO	C3 H8 O2	76.0524		4254-16-4, 63625-56-9, 190913-75-8, 1194046-20-2	Antioxidant, Antistatic Agent, Biocide, Catalyst, Colorant, Crosslinking Agent, Filler, Initiator, Intermediates, Light Stabilizer, Lubricant, Monomer, Odor Agent, Other Processing Aids, Plasticizer	HDPE, LDPE, PET, PP, PS, PUR	Agriculture, Automotive, Building & Construction, Electrical and Electronic Equipment, Food-contact plastics, Household items, furniture and other, Hygiene and Medical items, Packaging, Textiles, Toys	1	17	Canada, China, EU, India, Japan, Malaysia, Mexico, Nordic Countries, OECD, Philippines, Russia, South Korea, Taiwan, Thailand, Turkey, United States, Vietnam	1000000	100000	10000000	1000	11000000		1					0	0	0	0	1	0	0		1	1	1	high	0		EU Food Contact Materials Positive List, USA Food Contact Materials Positive List (GRAS), Japan Food Contact Materials Postiive List	1	1	1	1
903	'58430-94-7	1-Hexanol, 3,5,5-trimethyl-, 1-acetate	DGKXDLCVQSQVBC-UHFFFAOYSA-N	InChI=1/C11H22O2/c1-9(8-11(3,4)5)6-7-13-10(2)12/h9H,6-8H2,1-5H3	CC(CCOC(C)=O)CC(C)(C)C	C11 H22 O2	186.162			Odor Agent		Building & Construction, Electrical and Electronic Equipment, Household items, furniture and other, Textiles	0	13	Canada, China, EU, New Zealand, Nordic Countries, OECD, Philippines, Russia, South Korea, Taiwan, Turkey, United States, Vietnam	10000	10	1000	1000	11000		1					0	0	0	0	0	1	0		1	1	1	high	0			0	0	0	0
905	'586-62-9	Cyclohexene, 1-methyl-4-(1-methylethylidene)-	MOYAFQVGZZPNRA-UHFFFAOYSA-N	InChI=1S/C10H16/c1-8(2)10-6-4-9(3)5-7-10/h4H,5-7H2,1-3H3	CC(C)=C1CCC(C)=CC1	C10 H16	136.125		69073-38-7	Colorant, Lubricant, Odor Agent, Other Processing Aids		Automotive, Building & Construction, Food-contact plastics, Household items, furniture and other, Packaging, Textiles	1	15	Canada, China, EU, Japan, Mexico, Nordic Countries, OECD, Philippines, Russia, South Korea, Taiwan, Thailand, Turkey, United States, Vietnam	1000	10	10000	1000	11000		1					0	0	0	0	0	1	0		1	1	1	high	0		USA Food Contact Materials Positive List (GRAS), Japan Food Contact Materials Postiive List	1	0	1	1
906	'5888-33-5	2-Propenoic acid, (1R,2R,4R)-1,7,7-trimethylbicyclo[2.2.1]hept-2-yl ester, rel-	PSGCQDPCAWOCSH-BREBYQMCSA-N	InChI=1S/C13H20O2/c1-5-11(14)15-10-8-9-6-7-13(10,4)12(9,2)3/h5,9-10H,1,6-8H2,2-4H3/t9-,10-,13+/m1/s1	CC1(C)[C@@H]2CC[C@@]1(C)[C@@H](C2)OC(=O)C=C	C13 H20 O2	208.146		111821-21-7, 214686-31-4, 918779-70-1, 1202805-17-1, 1254182-70-1, 1467078-73-4, 2241097-19-6	Colorant, Filler, Initiator, Intermediates, Monomer, Other Processing Aids, Viscosity Modifier		Building & Construction, Electrical and Electronic Equipment, Hygiene and Medical items	0	14	Canada, China, EU, Japan, New Zealand, Nordic Countries, Philippines, Russia, South Korea, Taiwan, Thailand, Turkey, United States, Vietnam	10000	10	10000		20000		1					0	0	0	0	0	1	0		1	1	1	high	0		Japan Food Contact Materials Postiive List	1	0	0	1
914	'60676-86-0	Silica, vitreous				O2 Si			37224-34-3, 37224-35-4, 55126-05-1, 119573-97-6, 221007-06-3, 942229-17-6, 1355213-18-1, 1417404-62-6	Catalyst, Colorant, Crosslinking Agent, Filler, Lubricant, Other Processing Aids		Automotive, Building & Construction, Electrical and Electronic Equipment, Household items, furniture and other, Textiles, Toys	0	13	Canada, China, EU, Malaysia, Mexico, Nordic Countries, OECD, Philippines, South Korea, Taiwan, Turkey, United States, Vietnam		1000	1000000	1000	1001000		1					1	1	0	0	1	0	0		1	2	1	high	0			0	0	0	0
916	'614-45-9	Benzenecarboperoxoic acid, 1,1-dimethylethyl ester	GJBRNHKUVLOCEB-UHFFFAOYSA-N	InChI=1S/C11H14O3/c1-11(2,3)14-13-10(12)9-7-5-4-6-8-9/h4-8H,1-3H3	CC(C)(C)OOC(=O)C1=CC=CC=C1	C11 H14 O3	194.094		66745-94-6	Antioxidant, Catalyst, Crosslinking Agent, Filler, Initiator, Monomer, Other Processing Aids, Plasticizer	ABS, EPS, HDPE, LDPE, Other - Thermoplastic, PET, PS	Automotive, Building & Construction, Electrical and Electronic Equipment, Food-contact plastics, Packaging	1	16	Canada, China, EU, Japan, Malaysia, Mexico, Nordic Countries, OECD, Philippines, Russia, South Korea, Taiwan, Thailand, Turkey, United States, Vietnam	10000	100	10000	1000	20000		1					0	0	0	0	0	1	0		1	1	1	high	0		USA Food Contact Materials Positive List (GRAS), Japan Food Contact Materials Postiive List	1	0	1	1
921	'61788-32-7	Terphenyl, hydrogenated				Unspecified				Colorant, Crosslinking Agent, Filler, Intermediates, Other Processing Aids, Plasticizer		Automotive, Building & Construction, Food-contact plastics, Packaging	1	12	Canada, China, EU, Japan, Malaysia, Nordic Countries, OECD, Philippines, South Korea, Taiwan, United States, Vietnam	100000	10	-1	1000	100000	1	1	1	1	1	1	0	0	0	0	0.5	1	0		3	3.5	1	high	1	EU REACH SVHC	USA Food Contact Materials Positive List (GRAS)	1	0	1	0
925	'61790-50-9	Resin acids, potassium salts				Unspecified			67774-70-3, 68153-40-2, 68153-43-5, 68648-58-8, 103470-19-5	Biocide, Colorant, Filler, Intermediates, Lubricant, Odor Agent, Other Processing Aids		Automotive, Building & Construction, Food-contact plastics, Household items, furniture and other, Packaging, Textiles	1	12	Canada, China, EU, New Zealand, Nordic Countries, OECD, Philippines, South Korea, Taiwan, Turkey, United States, Vietnam	100000	10	100000	1000	200000		1					0	0	0	0	0	1	0		1	1	1	high	0		USA Food Contact Materials Positive List (GRAS)	1	0	1	0
926	'61791-44-4	Ethanol, 2,2'-iminobis-, N-tallow alkyl derivs.				Unspecified				Antistatic Agent, Lubricant, Other Processing Aids	ABS, HDPE, LDPE, PP, PS, PVC	Automotive, Building & Construction, Food-contact plastics, Packaging, Textiles	1	12	Canada, China, EU, New Zealand, Nordic Countries, OECD, Philippines, South Korea, Taiwan, Turkey, United States, Vietnam		100	10000	1000	10100		1					0	0	0	0	0	1	0		1	1	1	high	0			0	0	0	0
933	'6358-31-2	Butanamide, 2-[2-(2-methoxy-4-nitrophenyl)diazenyl]-N-(2-methoxyphenyl)-3-oxo-	ZTISORAUJJGACZ-UHFFFAOYSA-N	InChI=1/C18H18N4O6/c1-11(23)17(18(24)19-13-6-4-5-7-15(13)27-2)21-20-14-9-8-12(22(25)26)10-16(14)28-3/h4-10,17H,1-3H3,(H,19,24)	COC1=CC=CC=C1NC(=O)C(N=NC1=CC=C(C=C1OC)[N+]([O-])=O)C(C)=O	C18 H18 N4 O6	386.123		15792-29-7, 57769-75-2, 68859-59-6, 95660-49-4, 96352-24-8, 807629-76-1, 865089-22-1, 885613-63-8, 904293-27-2, 904293-28-3, 1309890-04-7, 1319008-82-6	Biocide, Colorant, Filler, Intermediates, Lubricant, Odor Agent, Other Processing Aids	ABS, HDPE, LDPE, PC, PET, PP, PS, PVC	Agriculture, Automotive, Building & Construction, Electrical and Electronic Equipment, Food-contact plastics, Household items, furniture and other, Packaging, Textiles, Toys	1	16	Canada, China, EU, Japan, Mexico, New Zealand, Nordic Countries, OECD, Philippines, Russia, South Korea, Taiwan, Thailand, Turkey, United States, Vietnam	10000	1000	10000	1000	20000		1					1	0	0	1	0	0	0		1	1	1	high	0			0	0	0	0
935	'6362-80-7	Benzene, 1,1'-(1,1-dimethyl-3-methylene-1,3-propanediyl)bis-	ZOKCNEIWFQCSCM-UHFFFAOYSA-N	InChI=1S/C18H20/c1-15(16-10-6-4-7-11-16)14-18(2,3)17-12-8-5-9-13-17/h4-13H,1,14H2,2-3H3	CC(C)(CC(=C)C1=CC=CC=C1)C1=CC=CC=C1	C18 H20	236.157			Intermediates, Other Processing Aids		Food-contact plastics, Packaging	1	9	Canada, China, EU, Japan, Nordic Countries, South Korea, Taiwan, United States, Vietnam	1000	0	10000		11000	1	0	1	0	1	0	0.5	0	0	0.5	0.5	1	0		3	4	1	high	0			0	0	0	0
937	'64-17-5	Ethanol	LFQSCWFLJHTTHZ-UHFFFAOYSA-N	InChI=1S/C2H6O/c1-2-3/h3H,2H2,1H3	CCO	C2 H6 O	46.0419		8000-16-6, 8024-45-1, 121182-78-3	Antistatic Agent, Biocide, Catalyst, Colorant, Crosslinking Agent, Filler, Intermediates, Light Stabilizer, Lubricant, Monomer, Odor Agent, Other Processing Aids	HDPE, LDPE, Other - Thermoplastic	Agriculture, Automotive, Building & Construction, Electrical and Electronic Equipment, Food-contact plastics, Household items, furniture and other, Hygiene and Medical items, Packaging, Textiles, Toys	1	15	Canada, China, EU, Japan, Malaysia, Mexico, Nordic Countries, OECD, Philippines, South Korea, Taiwan, Thailand, Turkey, United States, Vietnam	10000000	1000000	100000000	1000	110000000		1					1	1	1	1	1	1	0		1	5	1	high	0		EU Food Contact Materials Positive List, USA Food Contact Materials Positive List (GRAS), Japan Food Contact Materials Postiive List	1	1	1	1
939	'64-18-6	Formic acid	BDAGIHXWWSANSR-UHFFFAOYSA-N	InChI=1S/CH2O2/c2-1-3/h1H,(H,2,3)	OC=O	C H2 O2	46.0055		8006-93-7, 67382-92-7, 82069-14-5, 1016316-60-1	Biocide, Catalyst, Colorant, Crosslinking Agent, Intermediates, Light Stabilizer, Odor Agent, Other Processing Aids	HDPE, LDPE, PA, PP, PVC	Agriculture, Automotive, Building & Construction, Electrical and Electronic Equipment, Food-contact plastics, Household items, furniture and other, Packaging, Textiles	1	15	Canada, China, EU, India, Malaysia, Mexico, Nordic Countries, OECD, Philippines, South Korea, Taiwan, Thailand, Turkey, United States, Vietnam	1000000	100000	100000	1000	1100000		1					0.5	0	0	0.5	1	0.5	0	0.5	1	2.5	1	high	0		EU Food Contact Materials Positive List, USA Food Contact Materials Positive List (GRAS), Japan Food Contact Materials Postiive List	1	1	1	1
941	'646-06-0	1,3-Dioxolane	WNXJIVFYUVYPPR-UHFFFAOYSA-N	InChI=1S/C3H6O2/c1-2-5-3-4-1/h1-3H2	C1COCO1	C3 H6 O2	74.0368			Colorant, Filler, Intermediates, Light Stabilizer, Lubricant, Monomer, Odor Agent, Other Processing Aids	Other - Thermoplastic, PET	Automotive, Electrical and Electronic Equipment, Food-contact plastics, Packaging	1	15	Canada, China, EU, India, Japan, Mexico, Nordic Countries, OECD, Philippines, Russia, South Korea, Taiwan, Thailand, United States, Vietnam	10000	10	100000	1000	110000		1					1	0	0.5	1	0	0	0		1	1.5	1	high	0		EU Food Contact Materials Positive List, Japan Food Contact Materials Postiive List	1	1	0	1
942	'64741-44-2	Distillates (petroleum), straight-run middle				Unspecified				Heat Stabilizer, Lubricant		Automotive, Building & Construction, Electrical and Electronic Equipment, Household items, furniture and other, Textiles, Toys	0	14	Canada, China, EU, Malaysia, Mexico, New Zealand, Nordic Countries, OECD, Philippines, Russia, South Korea, Taiwan, United States, Vietnam	10000000	10	100000000	1000	110000000		1					0.5	0.5	0	0.5	1	0	0		1	2	1	high	0			0	0	0	0
943	'64742-47-8	Distillates (petroleum), hydrotreated light				Unspecified			101795-05-5	Antistatic Agent, Colorant, Filler, Light Stabilizer, Lubricant, Other Processing Aids, Plasticizer, Viscosity Modifier		Agriculture, Automotive, Building & Construction, Electrical and Electronic Equipment, Food-contact plastics, Household items, furniture and other, Packaging, Textiles, Toys	1	16	Canada, China, EU, India, Japan, Malaysia, Mexico, Nordic Countries, OECD, Philippines, Russia, South Korea, Taiwan, Turkey, United States, Vietnam	10000000	10000000	100000000	1000	110000000		1					1	1	1	0	0.5	0.5	0		1	3	1	high	0			0	0	0	0
944	'64742-48-9	Naphtha (petroleum), hydrotreated heavy				Unspecified			101795-02-2	Antistatic Agent, Biocide, Catalyst, Colorant, Crosslinking Agent, Filler, Intermediates, Light Stabilizer, Lubricant, Odor Agent, Other Processing Aids		Agriculture, Automotive, Building & Construction, Electrical and Electronic Equipment, Household items, furniture and other, Hygiene and Medical items, Packaging, Textiles, Toys	0	17	Canada, China, EU, India, Malaysia, Mexico, New Zealand, Nordic Countries, OECD, Philippines, Russia, South Korea, Taiwan, Thailand, Turkey, United States, Vietnam	10000000	100000	100000000	1000	110000000	0.5	0.5	0.5	0.5	0.5	0.5	1	1	1	0.5	0.5	1	0		1	4	1	high	0			0	0	0	0
945	'64742-52-5	Distillates (petroleum), hydrotreated heavy naphthenic				Unspecified				Antioxidant, Biocide, Colorant, Crosslinking Agent, Filler, Intermediates, Light Stabilizer, Lubricant, Other Processing Aids, Plasticizer		Agriculture, Automotive, Building & Construction, Electrical and Electronic Equipment, Household items, furniture and other, Packaging, Textiles	0	14	Canada, China, EU, Malaysia, Mexico, New Zealand, Nordic Countries, OECD, Philippines, South Korea, Taiwan, Turkey, United States, Vietnam	1000000	100000	10000000	1000	11000000		1					1	1	0	0.5	1	0	0		1	2.5	1	high	0			0	0	0	0
946	'64742-53-6	Distillates (petroleum), hydrotreated light naphthenic				Unspecified				Biocide, Catalyst, Colorant, Filler, Heat Stabilizer, Intermediates, Lubricant, Other Processing Aids, Plasticizer	Other - Rubber, PVC	Agriculture, Automotive, Building & Construction, Electrical and Electronic Equipment, Household items, furniture and other, Textiles, Toys	0	13	Canada, China, EU, Malaysia, New Zealand, Nordic Countries, OECD, Philippines, South Korea, Taiwan, Turkey, United States, Vietnam	1000000	10000	10000000	1000	11000000		1					1	1	0	0.5	1	0	0		1	2.5	1	high	0			0	0	0	0
947	'64742-54-7	Distillates (petroleum), hydrotreated heavy paraffinic				Unspecified				Biocide, Colorant, Filler, Heat Stabilizer, Intermediates, Lubricant, Other Processing Aids, Plasticizer		Agriculture, Automotive, Building & Construction, Electrical and Electronic Equipment, Household items, furniture and other, Textiles, Toys	0	15	Canada, China, EU, Malaysia, Mexico, New Zealand, Nordic Countries, OECD, Philippines, Russia, South Korea, Taiwan, Turkey, United States, Vietnam	10000000	100000	10000000	1000	20000000		1					1	1	0.5	1	1	0	0		1	3.5	1	high	0			0	0	0	0
952	'65405-77-8	Benzoic acid, 2-hydroxy-, (3Z)-3-hexen-1-yl ester	IEPWIPZLLIOZLU-ARJAWSKDSA-N	InChI=1S/C13H16O3/c1-2-3-4-7-10-16-13(15)11-8-5-6-9-12(11)14/h3-6,8-9,14H,2,7,10H2,1H3/b4-3-	CC\C=C/CCOC(=O)C1=C(O)C=CC=C1	C13 H16 O3	220.11			Odor Agent			0	13	Canada, China, EU, Japan, New Zealand, Nordic Countries, Philippines, Russia, South Korea, Taiwan, Turkey, United States, Vietnam	1000	1	1000		2000		1					0	0	0	0	0	1	0		1	1	1	high	0			0	0	0	0
956	'65996-78-3	Light oil (coal), coke-oven				Unspecified							0	9	Canada, China, EU, Nordic Countries, OECD, Russia, South Korea, Taiwan, United States		0	100000	1000	100000		1					1	1	1	0.5	1	0	0		1	3.5	1	high	0			0	0	0	0
958	'65997-17-3	Glass, oxide, chemicals				Unspecified			94551-77-6	Colorant, Crosslinking Agent, Filler, Intermediates, Other Processing Aids, Plasticizer	ABS, HDPE, LDPE, Other - Thermoplastic, PA, PC, PET, PP, PS, PVC	Automotive, Building & Construction, Electrical and Electronic Equipment, Food-contact plastics, Household items, furniture and other, Hygiene and Medical items, Packaging, Textiles	1	15	Canada, China, EU, Malaysia, Mexico, New Zealand, Nordic Countries, OECD, Philippines, Russia, South Korea, Taiwan, Turkey, United States, Vietnam	100	100000	10000000	1000	10000100		1					1	1	0	1	0.5	0	0		1	2.5	1	high	0		USA Food Contact Materials Positive List (GRAS)	1	0	1	0
963	'6731-36-8	Peroxide, 1,1'-(3,3,5-trimethylcyclohexylidene)bis[2-(1,1-dimethylethyl)	NALFRYPTRXKZPN-UHFFFAOYSA-N	InChI=1/C17H34O4/c1-13-10-16(8,9)12-17(11-13,20-18-14(2,3)4)21-19-15(5,6)7/h13H,10-12H2,1-9H3	CC1CC(C)(C)CC(C1)(OOC(C)(C)C)OOC(C)(C)C	C17 H34 O4	302.246		12701-77-8, 25061-02-3, 62534-34-3, 86857-22-9, 129510-85-6, 849676-64-8	Antioxidant, Catalyst, Crosslinking Agent, Initiator, Other Processing Aids, Plasticizer	PS	Automotive, Building & Construction, Electrical and Electronic Equipment, Packaging	0	13	Canada, China, EU, Japan, Mexico, Nordic Countries, Philippines, South Korea, Taiwan, Thailand, Turkey, United States, Vietnam	10000	10	1000		11000	0.5	0.5	0.5	0.5	0.5	0.5	0	0	0	0	0.5	1	0		1	1.5	1	high	0			0	0	0	0
964	'67-56-1	Methanol	OKKJLVBELUTLKV-UHFFFAOYSA-N	InChI=1S/CH4O/c1-2/h2H,1H3	CO	C H4 O	32.0262		54841-71-3, 1173023-83-0	Antioxidant, Antistatic Agent, Biocide, Catalyst, Colorant, Crosslinking Agent, Filler, Intermediates, Light Stabilizer, Lubricant, Monomer, Odor Agent, Other Processing Aids, Plasticizer, Solvent	ABS, HDPE, LDPE, PA, PET, PP	Agriculture, Automotive, Building & Construction, Electrical and Electronic Equipment, Food-contact plastics, Household items, furniture and other, Hygiene and Medical items, Packaging, Textiles, Toys	1	17	Canada, China, EU, India, Japan, Malaysia, Mexico, Nordic Countries, OECD, Philippines, Russia, South Korea, Taiwan, Thailand, Turkey, United States, Vietnam	100000000	1000000	10000000	1000	110000000	0.5	0.5	0.5	0.5	0.5	0.5	1	0.5	0	1	1	1	0		1	3.5	1	high	1	EU REACH Restriction, USA - California Proposition 65, Korea REACH Authorisation	EU Food Contact Materials Positive List, USA Food Contact Materials Positive List (GRAS), Japan Food Contact Materials Postiive List	1	1	1	1
965	'67-63-0	2-Propanol	KFZMGEQAYNKOFK-UHFFFAOYSA-N	InChI=1S/C3H8O/c1-3(2)4/h3-4H,1-2H3	CC(C)O	C3 H8 O	60.0575		8013-70-5	Antistatic Agent, Biocide, Catalyst, Colorant, Crosslinking Agent, Filler, Intermediates, Light Stabilizer, Lubricant, Monomer, Odor Agent, Other Processing Aids, Viscosity Modifier	HDPE, LDPE, PP	Agriculture, Automotive, Building & Construction, Electrical and Electronic Equipment, Food-contact plastics, Household items, furniture and other, Hygiene and Medical items, Packaging, Textiles, Toys	1	17	Canada, China, EU, India, Japan, Malaysia, Mexico, Nordic Countries, OECD, Philippines, Russia, South Korea, Taiwan, Thailand, Turkey, United States, Vietnam	1000000	100000	10000000	1000	11000000		1					0.5	0	0	0.5	1	0	0		1	1.5	1	high	0		EU Food Contact Materials Positive List, USA Food Contact Materials Positive List (GRAS), Japan Food Contact Materials Postiive List	1	1	1	1
969	'67-64-1	2-Propanone	CSCPPACGZOOCGX-UHFFFAOYSA-N	InChI=1S/C3H6O/c1-3(2)4/h1-2H3	CC(C)=O	C3 H6 O	58.0419			Antistatic Agent, Biocide, Catalyst, Colorant, Crosslinking Agent, Filler, Intermediates, Light Stabilizer, Lubricant, Odor Agent, Other Processing Aids, Solvent	HDPE, LDPE, Other - Rubber, Other - Thermoplastic, PA, PET, PP	Agriculture, Automotive, Building & Construction, Electrical and Electronic Equipment, Food-contact plastics, Household items, furniture and other, Hygiene and Medical items, Packaging, Textiles, Toys	1	16	Canada, China, EU, India, Malaysia, Mexico, Nordic Countries, OECD, Philippines, Russia, South Korea, Taiwan, Thailand, Turkey, United States, Vietnam	10000000	100000	10000000	1000	20000000		1					0.5	0	0	0.5	1	0	0		1	1.5	1	high	0		EU Food Contact Materials Positive List, USA Food Contact Materials Positive List (GRAS), Japan Food Contact Materials Postiive List	1	1	1	1
987	'68155-66-8	Ethanone, 1-(1,2,3,5,6,7,8,8a-octahydro-2,3,8,8-tetramethyl-2-naphthalenyl)-	NOMWSTMYQKABST-UHFFFAOYSA-N	InChI=1/C16H26O/c1-11-9-13-7-6-8-15(3,4)14(13)10-16(11,5)12(2)17/h9,11,14H,6-8,10H2,1-5H3	CC1C=C2CCCC(C)(C)C2CC1(C)C(C)=O	C16 H26 O	234.198			Odor Agent		Electrical and Electronic Equipment, Household items, furniture and other, Textiles	0	9	Canada, China, EU, Nordic Countries, OECD, Philippines, Taiwan, United States, Vietnam		1	-1	1000	1000		1					0	0	0	0	0	1	0		1	1	1	high	0			0	0	0	0
1003	'68424-85-1	Quaternary ammonium compounds, benzyl-C12-16-alkyldimethyl, chlorides				Unspecified			39403-41-3, 63449-42-3, 70294-44-9, 284043-23-8	Biocide		Automotive, Building & Construction, Electrical and Electronic Equipment, Textiles	0	14	Canada, China, EU, Mexico, New Zealand, Nordic Countries, OECD, Philippines, South Korea, Taiwan, Thailand, Turkey, United States, Vietnam		1000	100000	1000	101000		1					1	1	0	0	0.5	1	0		1	2.5	1	high	1	Korea REACH Authorisation	USA Food Contact Materials Positive List (GRAS), Japan Food Contact Materials Postiive List	1	0	1	1
1019	'686-31-7	Hexaneperoxoic acid, 2-ethyl-, 1,1-dimethylpropyl ester	IFXDUNDBQDXPQZ-UHFFFAOYSA-N	InChI=1/C13H26O3/c1-6-9-10-11(7-2)12(14)15-16-13(4,5)8-3/h11H,6-10H2,1-5H3	CCCCC(CC)C(=O)OOC(C)(C)CC	C13 H26 O3	230.188			Antioxidant, Catalyst, Crosslinking Agent, Initiator, Other Processing Aids, Plasticizer		Agriculture, Building & Construction	0	10	Canada, China, EU, New Zealand, Nordic Countries, Philippines, South Korea, Taiwan, United States, Vietnam	1000	0	10000		11000		1					0	0	0	0	0	1	0		1	1	1	high	0			0	0	0	0
1020	'68648-93-1	1,2-Benzenedicarboxylic acid, mixed decyl and hexyl and octyl diesters				Unspecified				Lubricant, Other Processing Aids, Plasticizer		Automotive, Building & Construction, Household items, furniture and other, Packaging, Textiles	0	8	Canada, China, EU, New Zealand, Nordic Countries, OECD, United States, Vietnam		0	-1	1000	1000		1					1	0	0	1	0	0	0		1	1	1	high	1	EU REACH Authorisation, EU REACH SVHC		0	0	0	0
1022	'68855-54-9	Kieselguhr, soda ash flux-calcined				Unspecified				Colorant, Filler, Intermediates, Lubricant, Other Processing Aids		Automotive, Building & Construction, Electrical and Electronic Equipment, Food-contact plastics, Household items, furniture and other, Hygiene and Medical items, Packaging, Textiles, Toys	1	13	Canada, China, EU, Malaysia, Mexico, Nordic Countries, OECD, Philippines, South Korea, Taiwan, Turkey, United States, Vietnam	1000000	1000	1000000	1000	2000000		1					1	1	0.5	0	1	0	0		1	2.5	1	high	0		EU Food Contact Materials Positive List, Japan Food Contact Materials Postiive List	1	1	0	1
1026	'68937-41-7	Phenol, isopropylated, phosphate (3:1)				Unspecified				Colorant, Flame Retardant, Intermediates, Lubricant, Other Processing Aids, Plasticizer	ABS, HDPE, HIPS, LDPE, Other - Bioplastic, Other - Rubber, Other - Thermoplastic, PC, PET, PP, PS, PUR, PVC	Agriculture, Automotive, Building & Construction, Electrical and Electronic Equipment, Household items, furniture and other, Packaging, Textiles	0	14	Canada, China, EU, Malaysia, Nordic Countries, OECD, Philippines, Russia, South Korea, Taiwan, Thailand, Turkey, United States, Vietnam	10000	100	10000	1000	20000		1					0.5	0	0	0.5	0.5	1	0		1	2	1	high	0		Japan Food Contact Materials Postiive List	1	0	0	1
1028	'68953-84-4	1,4-Benzenediamine, N,N'-mixed Ph and tolyl derivs.				Unspecified			70892-24-9	Antioxidant, Filler, Light Stabilizer	Other - Rubber	Automotive, Food-contact plastics, Packaging	1	13	Canada, China, EU, Japan, New Zealand, Nordic Countries, OECD, Philippines, South Korea, Taiwan, Turkey, United States, Vietnam	10000	100	100000	1000	110000	0.5	0.5	0.5	0.5	0.5	0.5	0.5	0	0	0.5	0	1	1		1	1.5	1	high	1	Japan CSCL Class I Restriction	USA Food Contact Materials Positive List (GRAS)	1	0	1	0
1035	'69-72-7	Benzoic acid, 2-hydroxy-	YGSDEFSMJLZEOE-UHFFFAOYSA-N	InChI=1S/C7H6O3/c8-6-4-2-1-3-5(6)7(9)10/h1-4,8H,(H,9,10)	OC(=O)C1=C(O)C=CC=C1	C7 H6 O3	138.032		7681-06-3, 8052-31-1, 1186130-36-8	Antistatic Agent, Blowing Agent, Colorant, Crosslinking Agent, Filler, Intermediates, Monomer, Odor Agent, Other Processing Aids		Agriculture, Building & Construction, Electrical and Electronic Equipment, Food-contact plastics, Household items, furniture and other, Packaging, Textiles	1	16	Canada, China, EU, Japan, Malaysia, Mexico, Nordic Countries, OECD, Philippines, Russia, South Korea, Taiwan, Thailand, Turkey, United States, Vietnam	10000	1000	10000	1000	20000		1					0.5	0	0	0.5	1	0.5	0		1	2	1	high	0		EU Food Contact Materials Positive List, USA Food Contact Materials Positive List (GRAS), Japan Food Contact Materials Postiive List	1	1	1	1
1039	'71-36-3	1-Butanol	LRHPLDYGYMQRHN-UHFFFAOYSA-N	InChI=1S/C4H10O/c1-2-3-4-5/h5H,2-4H2,1H3	CCCCO	C4 H10 O	74.0732		42031-19-6, 107569-51-7, 220713-25-7, 1154866-91-7	Antistatic Agent, Catalyst, Colorant, Crosslinking Agent, Filler, Intermediates, Light Stabilizer, Lubricant, Monomer, Odor Agent, Other Processing Aids, Plasticizer	HDPE, LDPE	Agriculture, Automotive, Building & Construction, Electrical and Electronic Equipment, Food-contact plastics, Household items, furniture and other, Hygiene and Medical items, Packaging, Textiles, Toys	1	17	Canada, China, EU, India, Japan, Malaysia, Mexico, Nordic Countries, OECD, Philippines, Russia, South Korea, Taiwan, Thailand, Turkey, United States, Vietnam	1000000	10000	10000000	1000	11000000	0.5	0.5	0.5	0.5	0.5	0.5	0	0	0	0	1	0	0		1	1	1	high	0		EU Food Contact Materials Positive List, USA Food Contact Materials Positive List (GRAS), Japan Food Contact Materials Postiive List	1	1	1	1
1040	'71-43-2	Benzene	UHOVQNZJYSORNB-UHFFFAOYSA-N	InChI=1S/C6H6/c1-2-4-6-5-3-1/h1-6H	C1=CC=CC=C1	C6 H6	78.047		54682-86-9, 174973-66-1, 1053658-43-7, 1173023-23-8	Catalyst, Colorant, Crosslinking Agent, Filler, Intermediates, Light Stabilizer, Lubricant, Odor Agent, Other Processing Aids, Plasticizer, Solvent	HDPE, LDPE, Other - Bioplastic, Other - Rubber, Other - Thermoplastic, PA, PP	Agriculture, Automotive, Building & Construction, Electrical and Electronic Equipment, Food-contact plastics, Household items, furniture and other, Hygiene and Medical items, Packaging, Textiles, Toys	1	15	Canada, China, EU, Japan, Malaysia, Mexico, Nordic Countries, OECD, Philippines, South Korea, Taiwan, Thailand, Turkey, United States, Vietnam	10000000	1000000	10000000	1000	20000000		1					1	1	1	0.5	1	0.5	0		1	4	1	high	1	Rotterdam Convention (EU PIC List), EU REACH Restriction, USA - California Proposition 65, Japan ISHA Restriction, Korea REACH Authorisation	USA Food Contact Materials Positive List (GRAS)	1	0	1	0
1044	'72623-83-7	Lubricating oils (petroleum), C>25, hydrotreated bright stock-based				Unspecified				Lubricant			0	12	Canada, China, EU, New Zealand, Nordic Countries, OECD, Philippines, South Korea, Taiwan, Turkey, United States, Vietnam		1000	10000000	1000	10001000		1					1	1	0	0.5	1	0	0		1	2.5	1	high	0			0	0	0	0
1049	'7429-90-5	Aluminum	XAGFODPZIPBFFR-UHFFFAOYSA-N	InChI=1S/Al	[Al]	Al	26.9815		12766-45-9, 37202-64-5, 39302-71-1, 39332-62-2, 80341-19-1, 91728-14-2, 113962-66-6, 121630-48-6, 182260-45-3, 185464-37-3, 257888-99-6, 298688-47-8, 349608-51-1, 477951-22-7, 934749-46-9, 1107613-92-2, 1107614-02-7, 1374563-19-5, 1374563-22-0, 1621997-91-8, 1799386-26-7, 1826890-06-5, 1946759-18-7, 2247261-17-0, 2247261-42-1, 2247261-50-1, 2250318-40-0	Antioxidant, Biocide, Catalyst, Colorant, Crosslinking Agent, Filler, Initiator, Intermediates, Light Stabilizer, Lubricant, Odor Agent, Other Processing Aids, Plasticizer	Other - Bioplastic	Automotive, Building & Construction, Electrical and Electronic Equipment, Food-contact plastics, Household items, furniture and other, Packaging, Textiles, Toys	1	14	Canada, China, EU, Malaysia, Mexico, Nordic Countries, OECD, Philippines, Russia, South Korea, Taiwan, Turkey, United States, Vietnam	100000000	10000	10000000	1000	110000000		1					0	0	0	0	1	1	0		1	2	1	high	1	EU Toys directive	USA Food Contact Materials Positive List (GRAS), Japan Food Contact Materials Postiive List	1	0	1	1
1050	'7440-31-5	Tin	ATJFFYVFTNAWJD-UHFFFAOYSA-N	InChI=1S/Sn	[Sn]	Sn	119.902			Catalyst, Colorant, Crosslinking Agent, Filler, Initiator, Intermediates, Light Stabilizer, Lubricant	Other - Bioplastic	Automotive, Building & Construction, Electrical and Electronic Equipment, Household items, furniture and other, Hygiene and Medical items, Textiles, Toys	0	14	Canada, China, EU, Malaysia, Mexico, Nordic Countries, OECD, Philippines, South Korea, Taiwan, Thailand, Turkey, United States, Vietnam	100000	1000	100000	1000	200000		1					0	0	0	0	1	0	1		1	1	1	high	1	EU Toys directive	Japan Food Contact Materials Postiive List	1	0	0	1
1055	'75-01-4	Ethene, chloro-	BZHJMEDXRYGGRV-UHFFFAOYSA-N	InChI=1S/C2H3Cl/c1-2-3/h2H,1H2	ClC=C	C2 H3 Cl	61.9923		1187028-37-0	Colorant, Filler, Flame Retardant, Intermediates, Monomer, Other Processing Aids	ABS, Other - Thermoplastic, PVC	Automotive, Building & Construction, Electrical and Electronic Equipment, Food-contact plastics, Household items, furniture and other, Packaging, Textiles	1	16	Canada, China, EU, Japan, Malaysia, Mexico, Nordic Countries, OECD, Philippines, Russia, South Korea, Taiwan, Thailand, Turkey, United States, Vietnam	10000000	100000	10000000	1000	20000000		1					1	1	0.5	0.5	1	0.5	0		1	3.5	1	high	1	EU REACH Restriction, USA - California Proposition 65, Korea REACH Authorisation	EU Food Contact Materials Positive List, USA Food Contact Materials Positive List (GRAS), Japan Food Contact Materials Postiive List	1	1	1	1
1056	'75-28-5	Propane, 2-methyl-	NNPPMTNAJDCUHE-UHFFFAOYSA-N	InChI=1S/C4H10/c1-4(2)3/h4H,1-3H3	CC(C)C	C4 H10	58.0783		70357-15-2, 100494-20-0, 1326305-81-0	Biocide, Blowing Agent, Colorant, Filler, Intermediates, Lubricant, Odor Agent, Other Processing Aids, Plasticizer	LDPE	Agriculture, Automotive, Building & Construction, Electrical and Electronic Equipment, Food-contact plastics, Household items, furniture and other, Packaging, Textiles, Toys	1	16	Canada, China, EU, Japan, Malaysia, Mexico, Nordic Countries, OECD, Philippines, Russia, South Korea, Taiwan, Thailand, Turkey, United States, Vietnam	10000000	10000	100000000	1000	110000000		1					1	1	1	1	0	0	0		1	3	1	high	0		USA Food Contact Materials Positive List (GRAS)	1	0	1	0
1057	'756-79-6	Phosphonic acid, P-methyl-, dimethyl ester	VONWDASPFIQPDY-UHFFFAOYSA-N	InChI=1S/C3H9O3P/c1-5-7(3,4)6-2/h1-3H3	COP(C)(=O)OC	C3 H9 O3 P	124.029		351011-43-3, 880251-70-7	Filler, Flame Retardant, Other Processing Aids	PET, PUR, PVC	Building & Construction, Packaging	0	14	Canada, China, EU, Japan, Mexico, New Zealand, Nordic Countries, Philippines, Russia, South Korea, Taiwan, Thailand, United States, Vietnam		100	1000		1100		1					1	0	1	0.5	0	0	0		1	1.5	1	high	0			0	0	0	0
1060	'75-91-2	Hydroperoxide, 1,1-dimethylethyl	CIHOLLKRGTVIJN-UHFFFAOYSA-N	InChI=1S/C4H10O2/c1-4(2,3)6-5/h5H,1-3H3	CC(C)(C)OO	C4 H10 O2	90.0681			Antioxidant, Catalyst, Crosslinking Agent, Initiator, Other Processing Aids, Plasticizer	ABS, HDPE, LDPE, Other - Thermoplastic	Agriculture, Building & Construction, Electrical and Electronic Equipment, Food-contact plastics, Household items, furniture and other, Packaging, Textiles	1	17	Canada, China, EU, Japan, Malaysia, Mexico, New Zealand, Nordic Countries, OECD, Philippines, Russia, South Korea, Taiwan, Thailand, Turkey, United States, Vietnam	1000000	1000	100000	1000	1100000		1					0.5	0	0.5	0	1	0.5	0		1	2	1	high	0		USA Food Contact Materials Positive List (GRAS), Japan Food Contact Materials Postiive List	1	0	1	1
1062	'76-22-2	Bicyclo[2.2.1]heptan-2-one, 1,7,7-trimethyl-	DSSYKIVIOFKYAU-UHFFFAOYSA-N	InChI=1/C10H16O/c1-9(2)7-4-5-10(9,3)8(11)6-7/h7H,4-6H2,1-3H3	CC1(C)C2CCC1(C)C(=O)C2	C10 H16 O	152.12		8013-55-6, 8022-77-3, 21368-68-3, 48113-22-0	Biocide, Colorant, Intermediates, Lubricant, Odor Agent, Plasticizer	LDPE	Agriculture, Automotive, Building & Construction, Food-contact plastics, Household items, furniture and other, Packaging, Textiles	1	16	Canada, China, EU, India, Japan, Malaysia, Mexico, Nordic Countries, Philippines, Russia, South Korea, Taiwan, Thailand, Turkey, United States, Vietnam	10000	10	1000		11000		1					1	0.5	0.5	1	1	0.5	0		1	3.5	1	high	0		EU Food Contact Materials Positive List, USA Food Contact Materials Positive List (GRAS)	1	1	1	0
1063	'7631-86-9	Silica	VYPSYNLAJGMNEJ-UHFFFAOYSA-N	InChI=1S/O2Si/c1-3-2	O=[Si]=O	O2 Si	59.9668		1340-09-6, 9049-77-8, 11139-72-3, 11139-73-4, 12125-13-2, 12737-36-9, 12753-63-8, 12765-74-1, 12774-28-6, 37220-24-9, 37241-25-1, 37334-65-9, 37340-45-7, 37380-93-1, 39336-66-8, 39372-58-2, 39409-25-1, 39443-40-8, 39456-81-0, 50813-13-3, 50926-93-7, 50935-83-6, 51542-57-5, 51542-58-6, 52350-43-3, 53468-64-7, 55599-33-2, 56645-27-3, 56731-06-7, 60572-11-4, 61673-46-9, 62655-73-6, 67167-16-2, 70536…	Antioxidant, Antistatic Agent, Biocide, Blowing Agent, Catalyst, Colorant, Crosslinking Agent, Filler, Intermediates, Light Stabilizer, Lubricant, Odor Agent, Other Processing Aids, Plasticizer, Viscosity Modifier	ABS, HDPE, LDPE, Other - Rubber, Other - Thermoplastic, PA, PC, PET, PP, PUR, PVC	Agriculture, Automotive, Building & Construction, Electrical and Electronic Equipment, Food-contact plastics, Household items, furniture and other, Hygiene and Medical items, Packaging, Textiles, Toys	1	16	Canada, China, EU, Japan, Malaysia, Mexico, Nordic Countries, OECD, Philippines, Russia, South Korea, Taiwan, Thailand, Turkey, United States, Vietnam	1000000	1000000	10000000	1000	11000000		1					1	1	1	0	1	0	0		1	3	1	high	0		EU Food Contact Materials Positive List, USA Food Contact Materials Positive List (GRAS), Japan Food Contact Materials Postiive List	1	1	1	1
1064	'7632-00-0	Nitrous acid, sodium salt (1:1)	LPXPTNMVRIOKMN-UHFFFAOYSA-M	InChI=1S/HNO2.Na/c2-1-3;/h(H,2,3);/q;+1/p-1	[Na+].[O-]N=O	H N O2 . Na	68.9827		32863-15-3, 56227-20-4, 82497-43-6, 82998-40-1, 1992765-27-1	Antioxidant, Antistatic Agent, Catalyst, Colorant, Filler, Light Stabilizer, Lubricant, Other Processing Aids		Agriculture, Automotive, Building & Construction, Electrical and Electronic Equipment, Food-contact plastics, Household items, furniture and other, Packaging, Textiles	1	16	Canada, China, EU, Japan, Malaysia, Mexico, Nordic Countries, OECD, Philippines, Russia, South Korea, Taiwan, Thailand, Turkey, United States, Vietnam	100000	10000	100000	1000	200000	0.5	0.5	0.5	0.5	0.5	0.5	1	1	0.5	1	0.5	1	0		1	4	1	high	1	Korea REACH Authorisation	EU Food Contact Materials Positive List, USA Food Contact Materials Positive List (GRAS), Japan Food Contact Materials Postiive List	1	1	1	1
1065	'7647-01-0	Hydrochloric acid	VEXZGXHMUGYJMC-UHFFFAOYSA-N	InChI=1S/ClH/h1H	Cl	Cl H	35.9767		51005-19-7, 61674-62-2, 113962-65-5, 218625-68-4	Antioxidant, Biocide, Catalyst, Colorant, Crosslinking Agent, Filler, Intermediates, Light Stabilizer, Other Processing Aids	Other - Thermoplastic, PVC	Agriculture, Automotive, Building & Construction, Electrical and Electronic Equipment, Food-contact plastics, Household items, furniture and other, Hygiene and Medical items, Packaging, Textiles, Toys	1	16	Canada, China, EU, Japan, Malaysia, Mexico, Nordic Countries, OECD, Philippines, Russia, South Korea, Taiwan, Thailand, Turkey, United States, Vietnam	10000000	100000	10000000	1000	20000000		1					0	0	0	0	1	1	1		1	2	1	high	1	Korea REACH Authorisation	EU Food Contact Materials Positive List, USA Food Contact Materials Positive List (GRAS), Japan Food Contact Materials Postiive List	1	1	1	1
1066	'7664-41-7	Ammonia	QGZKDVFQNNGYKY-UHFFFAOYSA-N	InChI=1S/H3N/h1H3	N	H3 N	17.0265		8007-57-6, 208990-07-2, 214478-05-4, 558443-52-0, 1026405-88-8	Antioxidant, Biocide, Colorant, Filler, Intermediates, Lubricant, Monomer, Odor Agent, Other Processing Aids, Plasticizer	PA	Agriculture, Automotive, Building & Construction, Electrical and Electronic Equipment, Food-contact plastics, Household items, furniture and other, Packaging, Textiles, Toys	1	17	Canada, China, EU, India, Japan, Malaysia, Mexico, Nordic Countries, OECD, Philippines, Russia, South Korea, Taiwan, Thailand, Turkey, United States, Vietnam	100000000	1000000	100000000	1000	200000000		1					0.5	0	0.5	0	1	1	1		1	2.5	1	high	1	Korea REACH Authorisation	EU Food Contact Materials Positive List, USA Food Contact Materials Positive List (GRAS), Japan Food Contact Materials Postiive List	1	1	1	1
1067	'7664-93-9	Sulfuric acid	QAOWNCQODCNURD-UHFFFAOYSA-N	InChI=1S/H2O4S/c1-5(2,3)4/h(H2,1,2,3,4)	OS(O)(=O)=O	H2 O4 S	97.9674		119540-51-1, 127529-01-5, 140623-70-7	Antioxidant, Biocide, Catalyst, Colorant, Crosslinking Agent, Filler, Intermediates, Light Stabilizer, Lubricant, Odor Agent, Other Processing Aids, Plasticizer, Solvent	Other - Thermoplastic, PA	Agriculture, Automotive, Building & Construction, Electrical and Electronic Equipment, Food-contact plastics, Household items, furniture and other, Packaging, Textiles, Toys	1	18	Canada, China, EU, India, Japan, Malaysia, Mexico, New Zealand, Nordic Countries, OECD, Philippines, Russia, South Korea, Taiwan, Thailand, Turkey, United States, Vietnam	100000000	10000000	100000000	1000	200000000		1					1	1	0	0	1	0.5	0		1	2.5	1	high	1	Korea REACH Authorisation	EU Food Contact Materials Positive List, USA Food Contact Materials Positive List (GRAS), Japan Food Contact Materials Postiive List	1	1	1	1
1068	'7681-52-9	Hypochlorous acid, sodium salt (1:1)	SUKJFIGYRHOWBL-UHFFFAOYSA-N	InChI=1S/ClO.Na/c1-2;/q-1;+1	[Na+].[O-]Cl	Cl H O . Na	73.9535		8007-59-8, 56172-57-7, 102324-78-7, 227453-69-2, 2243270-16-6	Antioxidant, Biocide, Colorant, Plasticizer		Agriculture, Automotive, Building & Construction, Electrical and Electronic Equipment, Food-contact plastics, Household items, furniture and other, Hygiene and Medical items, Packaging, Textiles, Toys	1	15	Canada, China, EU, Japan, Malaysia, Mexico, Nordic Countries, OECD, Philippines, South Korea, Taiwan, Thailand, Turkey, United States, Vietnam	10000000	100000	10000000	1000	20000000		1					0	0	0	0	0.5	1	0		1	1.5	1	high	0		USA Food Contact Materials Positive List (GRAS), Japan Food Contact Materials Postiive List	1	0	1	1
1070	'7681-65-4	Copper iodide (CuI)	LSXDOTMGLUJQCM-UHFFFAOYSA-M	InChI=1S/Cu.HI/h;1H/q+1;/p-1	[Cu+].[I-]	Cu I	189.834		12527-63-8, 40452-11-7, 265669-02-1	Heat Stabilizer, Intermediates, Light Stabilizer, Other Processing Aids	PA	Food-contact plastics, Packaging	1	13	Canada, China, EU, Japan, Mexico, Nordic Countries, Philippines, Russia, South Korea, Taiwan, Thailand, United States, Vietnam	1000	0	1000		2000		1					0	0	0	0	1	1	0		1	2	1	high	1	EU Toys directive	USA Food Contact Materials Positive List (GRAS), Japan Food Contact Materials Postiive List	1	0	1	1
1073	'7727-43-7	Sulfuric acid, barium salt (1:1)	TZCXTZWJZNENPQ-UHFFFAOYSA-L	InChI=1S/Ba.H2O4S/c;1-5(2,3)4/h;(H2,1,2,3,4)/q+2;/p-2	[Ba++].[O-]S([O-])(=O)=O	Ba . H2 O4 S	233.857	29203-54-1	8054-35-1, 12751-32-5, 1314087-22-3, 1352053-72-5, 1400694-37-2, 2095567-47-6	Antioxidant, Colorant, Crosslinking Agent, Filler, Intermediates, Lubricant, Other Processing Aids, Plasticizer	ABS, EPS, HDPE, HIPS, LDPE, Other - Bioplastic, Other - Thermoplastic, PA, PC, PET, PP, PS, PUR, PVC	Agriculture, Automotive, Building & Construction, Electrical and Electronic Equipment, Food-contact plastics, Household items, furniture and other, Hygiene and Medical items, Packaging, Textiles, Toys	1	16	Canada, China, EU, Japan, Malaysia, Mexico, Nordic Countries, OECD, Philippines, Russia, South Korea, Taiwan, Thailand, Turkey, United States, Vietnam	100000	10000	100000	1000	200000		1					0	0	0	0	1	0.5	0		1	1.5	1	high	1	EU Toys directive	USA Food Contact Materials Positive List (GRAS), Japan Food Contact Materials Postiive List	1	0	1	1
1074	'7727-54-0	Peroxydisulfuric acid ([(HO)S(O)2]2O2), ammonium salt (1:2)	ROOXNKNUYICQNP-UHFFFAOYSA-N	InChI=1S/2H3N.H2O8S2/c;;1-9(2,3)7-8-10(4,5)6/h2*1H3;(H,1,2,3)(H,4,5,6)	[NH4+].[NH4+].[O-]S(=O)(=O)OOS([O-])(=O)=O	H3 N . 1/2 H2 O8 S2	227.972		398469-95-9, 2143053-20-5	Antioxidant, Catalyst, Colorant, Crosslinking Agent, Filler, Initiator, Intermediates, Lubricant, Odor Agent, Other Processing Aids, Plasticizer	Other - Thermoplastic, PS, PVC	Automotive, Building & Construction, Electrical and Electronic Equipment, Food-contact plastics, Household items, furniture and other, Packaging, Textiles	1	16	Canada, China, EU, Japan, Malaysia, Mexico, Nordic Countries, OECD, Philippines, Russia, South Korea, Taiwan, Thailand, Turkey, United States, Vietnam	100000	1000	100000	1000	200000		1					0	0	0	0	1	0.5	1		1	1.5	1	high	0		USA Food Contact Materials Positive List (GRAS), Japan Food Contact Materials Postiive List	1	0	1	1
1075	'77-47-4	1,3-Cyclopentadiene, 1,2,3,4,5,5-hexachloro-	VUNCWTMEJYMOOR-UHFFFAOYSA-N	InChI=1S/C5Cl6/c6-1-2(7)4(9)5(10,11)3(1)8	ClC1=C(Cl)C(Cl)(Cl)C(Cl)=C1Cl	C5 Cl6	269.813			Colorant, Flame Retardant, Intermediates, Other Processing Aids			0	13	Canada, China, EU, Japan, Mexico, Nordic Countries, OECD, Philippines, Russia, South Korea, Taiwan, United States, Vietnam	100	0	10000	1000	10100		1					0	0	0	0	1	1	0		1	2	1	high	1	Korea REACH Authorisation		0	0	0	0
1077	'7757-79-1	Nitric acid potassium salt (1:1)	FGIUAXJPYTZDNR-UHFFFAOYSA-N	InChI=1S/K.NO3/c;2-1(3)4/q+1;-1	[K+].[O-][N+]([O-])=O	H N O3 . K	100.952		96193-83-8	Colorant, Other Processing Aids		Automotive	0	16	Canada, China, EU, Japan, Malaysia, Mexico, Nordic Countries, OECD, Philippines, Russia, South Korea, Taiwan, Thailand, Turkey, United States, Vietnam	10000000	10000	1000000	1000	11000000		1					0.5	0	0	0.5	1	0	0		1	1.5	1	high	0		USA Food Contact Materials Positive List (GRAS)	1	0	1	0
1080	'7758-89-6	Copper chloride (CuCl)	OXBLHERUFWYNTN-UHFFFAOYSA-M	InChI=1S/ClH.Cu/h1H;/q;+1/p-1	[Cl-].[Cu+]	Cl Cu	97.8985		11093-68-8, 12258-96-7, 12622-24-1, 53906-70-0, 53906-71-1, 53906-72-2, 53906-73-3	Biocide, Catalyst, Colorant, Intermediates, Other Processing Aids	Other - Thermoplastic	Building & Construction, Electrical and Electronic Equipment	0	15	Canada, China, EU, Japan, Mexico, New Zealand, Nordic Countries, OECD, Philippines, Russia, South Korea, Taiwan, Thailand, United States, Vietnam	10000	10	10000	1000	20000		1					0	0	0	0	0.5	1	0		1	1.5	1	high	1	EU Toys directive		0	0	0	0
1081	'77-73-6	4,7-Methano-1H-indene, 3a,4,7,7a-tetrahydro-	HECLRDQVFMWTQS-UHFFFAOYSA-N	InChI=1/C10H12/c1-2-9-7-4-5-8(6-7)10(9)3-1/h1-2,4-5,7-10H,3,6H2	C1C=CC2C3CC(C=C3)C12	C10 H12	132.094		45737-84-6, 54335-17-0, 107760-16-7, 275363-11-6, 1910068-41-5	Colorant, Filler, Intermediates, Lubricant, Monomer, Other Processing Aids, Plasticizer	Other - Rubber, PET	Automotive, Building & Construction, Electrical and Electronic Equipment, Food-contact plastics, Packaging	1	15	Canada, China, EU, Japan, Mexico, Nordic Countries, OECD, Philippines, Russia, South Korea, Taiwan, Thailand, Turkey, United States, Vietnam	1000000	1000	1000000	1000	2000000		1					1	0	0	1	1	1	0		1	3	1	high	0		USA Food Contact Materials Positive List (GRAS), Japan Food Contact Materials Postiive List	1	0	1	1
1085	'7779-90-0	Phosphoric acid, zinc salt (2:3)	LRXTYHSAJDENHV-UHFFFAOYSA-H	InChI=1S/2H3O4P.3Zn/c2*1-5(2,3)4;;;/h2*(H3,1,2,3,4);;;/q;;3*+2/p-6	[Zn++].[Zn++].[Zn++].[O-]P([O-])([O-])=O.[O-]P([O-])([O-])=O	H3 O4 P . 3/2 Zn	381.694	13847-22-8, 121734-21-2	1337-79-7, 9079-63-4, 55965-16-7, 57572-56-2, 87502-49-6, 101550-86-1, 102819-71-6, 134092-23-2, 227619-99-0, 452069-73-7, 630110-04-2, 658697-52-0, 847870-29-5, 849830-33-7, 871114-28-2, 1299491-91-0, 2026613-79-4	Biocide, Colorant, Filler, Flame Retardant, Intermediates, Lubricant, Odor Agent, Other Processing Aids	PVC	Automotive, Building & Construction, Electrical and Electronic Equipment, Food-contact plastics, Household items, furniture and other, Packaging, Textiles	1	16	Canada, China, EU, Japan, Malaysia, New Zealand, Nordic Countries, OECD, Philippines, Russia, South Korea, Taiwan, Thailand, Turkey, United States, Vietnam	100000	10000	10000	1000	110000		1					0.5	0	0	0.5	1	1	0		1	2.5	1	high	1	EU Toys directive, Korea REACH Authorisation	USA Food Contact Materials Positive List (GRAS), Japan Food Contact Materials Postiive List	1	0	1	1
1087	'7782-49-2	Selenium	BUGBHKTXTAQXES-UHFFFAOYSA-N	InChI=1S/Se	[Se]	Se	79.9165		11125-23-8, 11133-88-3, 12640-29-8, 12640-30-1, 12641-96-2, 12733-65-2, 37256-19-2, 37258-85-8, 37276-15-6, 37368-02-8, 50954-17-1, 51882-60-1, 95788-45-7	Colorant, Filler, Other Processing Aids	Other - Bioplastic	Agriculture, Automotive, Building & Construction, Electrical and Electronic Equipment, Textiles	0	14	Canada, China, EU, Mexico, New Zealand, Nordic Countries, Philippines, Russia, South Korea, Taiwan, Thailand, Turkey, United States, Vietnam	10000	100	1000		11000		1					1	1	0	1	1	1	0		1	4	1	high	1	EU Toys directive, Korea REACH Authorisation		0	0	0	0
1088	'7782-50-5	Chlorine	KZBUYRJDOAKODT-UHFFFAOYSA-N	InChI=1S/Cl2/c1-2	ClCl	Cl2	69.9377			Antioxidant, Biocide, Blowing Agent, Catalyst, Colorant, Filler, Intermediates, Lubricant, Monomer, Other Processing Aids, Plasticizer		Automotive, Building & Construction, Food-contact plastics, Household items, furniture and other, Packaging, Textiles, Toys	1	15	Canada, China, EU, Malaysia, Mexico, Nordic Countries, OECD, Philippines, Russia, South Korea, Taiwan, Thailand, Turkey, United States, Vietnam	10000000	1000000	100000000	1000	110000000		1					0	0	0	0	1	1	0		1	2	1	high	0		EU Food Contact Materials Positive List, USA Food Contact Materials Positive List (GRAS)	1	1	1	0
1093	'77-98-5	Ethanaminium, N,N,N-triethyl-, hydroxide (1:1)	LRGJRHZIDJQFCL-UHFFFAOYSA-M	InChI=1S/C8H20N.H2O/c1-5-9(6-2,7-3)8-4;/h5-8H2,1-4H3;1H2/q+1;/p-1	[OH-].CC[N+](CC)(CC)CC	C8 H20 N . H O	147.162		588683-10-7	Other Processing Aids		Electrical and Electronic Equipment	0	14	Canada, China, EU, Japan, Malaysia, Mexico, New Zealand, Nordic Countries, Philippines, South Korea, Taiwan, Thailand, United States, Vietnam	1000	0	100000		101000		1					0	0	0	0	1	0	0		1	1	1	high	0		Japan Food Contact Materials Postiive List	1	0	0	1
1094	'77-99-6	1,3-Propanediol, 2-ethyl-2-(hydroxymethyl)-	ZJCCRDAZUWHFQH-UHFFFAOYSA-N	InChI=1S/C6H14O3/c1-2-6(3-7,4-8)5-9/h7-9H,2-5H2,1H3	CCC(CO)(CO)CO	C6 H14 O3	134.094		30774-18-6, 51811-73-5, 53632-31-8, 59218-55-2, 65581-89-7, 69896-09-9, 77974-02-8, 97649-49-5, 101164-61-8, 102984-18-9, 110368-52-0, 853320-12-4, 2182590-63-0	Colorant, Crosslinking Agent, Filler, Heat Stabilizer, Intermediates, Light Stabilizer, Lubricant, Monomer, Other Processing Aids, Plasticizer	PVC	Agriculture, Automotive, Building & Construction, Electrical and Electronic Equipment, Food-contact plastics, Household items, furniture and other, Packaging, Textiles, Toys	1	17	Canada, China, EU, Japan, Malaysia, Mexico, New Zealand, Nordic Countries, OECD, Philippines, Russia, South Korea, Taiwan, Thailand, Turkey, United States, Vietnam	100000	10000	1000000	1000	1100000		1					0	0	0	0	0	1	0		1	1	1	high	0		EU Food Contact Materials Positive List, USA Food Contact Materials Positive List (GRAS), Japan Food Contact Materials Postiive List	1	1	1	1
1098	'78-42-2	Phosphoric acid, tris(2-ethylhexyl) ester	GTVWRXDRKAHEAD-UHFFFAOYSA-N	InChI=1/C24H51O4P/c1-7-13-16-22(10-4)19-26-29(25,27-20-23(11-5)17-14-8-2)28-21-24(12-6)18-15-9-3/h22-24H,7-21H2,1-6H3	CCCCC(CC)COP(=O)(OCC(CC)CCCC)OCC(CC)CCCC	C24 H51 O4 P	434.352		1546892-14-1	Colorant, Filler, Flame Retardant, Intermediates, Lubricant, Other Processing Aids, Plasticizer	PVC	Agriculture, Automotive, Building & Construction, Food-contact plastics, Hygiene and Medical items, Packaging, Textiles	1	15	Canada, China, EU, Japan, New Zealand, Nordic Countries, OECD, Philippines, Russia, South Korea, Taiwan, Thailand, Turkey, United States, Vietnam	10000	100	10000	1000	20000		1					0	0	0	0	0	1	0		1	1	1	high	0		USA Food Contact Materials Positive List (GRAS), Japan Food Contact Materials Postiive List	1	0	1	1
1104	'78-79-5	1,3-Butadiene, 2-methyl-	RRHGJUQNOFWUDK-UHFFFAOYSA-N	InChI=1S/C5H8/c1-4-5(2)3/h4H,1-2H2,3H3	CC(=C)C=C	C5 H8	68.0626		78006-92-5, 823271-95-0, 2378489-72-4	Filler, Intermediates, Lubricant, Monomer, Other Processing Aids		Automotive, Building & Construction, Food-contact plastics, Packaging	1	14	Canada, China, EU, Japan, Mexico, Nordic Countries, OECD, Philippines, Russia, South Korea, Taiwan, Thailand, United States, Vietnam	1000000	100	1000000	1000	2000000		1					1	1	0.5	0.5	1	0.5	0		1	3.5	1	high	1	USA - California Proposition 65	EU Food Contact Materials Positive List, USA Food Contact Materials Positive List (GRAS), Japan Food Contact Materials Postiive List	1	1	1	1
1106	'78-93-3	2-Butanone	ZWEHNKRNPOVVGH-UHFFFAOYSA-N	InChI=1S/C4H8O/c1-3-4(2)5/h3H2,1-2H3	CCC(C)=O	C4 H8 O	72.0575		135311-02-3	Biocide, Catalyst, Colorant, Crosslinking Agent, Filler, Intermediates, Lubricant, Odor Agent, Other Processing Aids	HDPE, LDPE, Other - Thermoplastic, PA	Agriculture, Automotive, Building & Construction, Electrical and Electronic Equipment, Food-contact plastics, Household items, furniture and other, Hygiene and Medical items, Packaging, Textiles, Toys	1	16	Canada, China, EU, India, Malaysia, Mexico, Nordic Countries, OECD, Philippines, Russia, South Korea, Taiwan, Thailand, Turkey, United States, Vietnam	1000000	10000	1000000	1000	2000000		1					0	0	0	0	1	0	0		1	1	1	high	1	Korea REACH Authorisation	USA Food Contact Materials Positive List (GRAS), Japan Food Contact Materials Postiive List	1	0	1	1
1107	'79-10-7	2-Propenoic acid	NIXOWILDQLNWCW-UHFFFAOYSA-N	InChI=1S/C3H4O2/c1-2-3(4)5/h2H,1H2,(H,4,5)	OC(=O)C=C	C3 H4 O2	72.0211		55927-87-2, 166941-59-9, 211862-52-1, 1265528-53-7, 1453489-99-0, 1644624-02-1, 1703019-10-6, 1873349-31-5, 2015239-27-5, 2133361-51-8	Colorant, Crosslinking Agent, Filler, Intermediates, Light Stabilizer, Lubricant, Monomer, Other Processing Aids	ABS, HDPE, LDPE, Other - Thermoplastic, PA, PET	Agriculture, Automotive, Building & Construction, Electrical and Electronic Equipment, Food-contact plastics, Household items, furniture and other, Hygiene and Medical items, Packaging, Textiles	1	17	Canada, China, EU, India, Japan, Malaysia, Mexico, Nordic Countries, OECD, Philippines, Russia, South Korea, Taiwan, Thailand, Turkey, United States, Vietnam	10000000	10000	10000000	1000	20000000		1					0	0	0	0	1	1	0		1	2	1	high	0		EU Food Contact Materials Positive List, USA Food Contact Materials Positive List (GRAS), Japan Food Contact Materials Postiive List	1	1	1	1
1110	'8005-02-5	C.I. Solvent Black 7				Unspecified			12227-80-4, 53802-38-3, 59494-26-7, 65721-98-4, 70431-57-1, 72626-24-5, 87003-35-8, 114013-31-9, 162731-49-9	Colorant		Electrical and Electronic Equipment	0	13	Canada, China, EU, Japan, New Zealand, Nordic Countries, OECD, Philippines, Russia, South Korea, Taiwan, United States, Vietnam		100	10000	1000	10100		1					0.5	0.5	0.5	0	1	1	0		1	3	1	high	0			0	0	0	0
1111	'8006-64-2	Turpentine oil				Unspecified			8052-40-2	Colorant, Crosslinking Agent, Intermediates, Lubricant, Odor Agent, Other Processing Aids, Plasticizer		Agriculture, Automotive, Building & Construction, Electrical and Electronic Equipment, Food-contact plastics, Household items, furniture and other, Packaging, Textiles	1	15	Canada, China, EU, Japan, Malaysia, Mexico, Nordic Countries, OECD, Philippines, Russia, South Korea, Taiwan, Turkey, United States, Vietnam	100000	10000	1000000	1000	1100000		1					0.5	0.5	0	0	1	1	0		1	2.5	1	high	1	EU Toys directive	USA Food Contact Materials Positive List (GRAS)	1	0	1	0
1112	'8007-18-9	C.I. Pigment Yellow 53				Unspecified			12227-91-7, 71077-18-4, 90552-50-4, 1219711-52-0, 2136320-15-3	Colorant, Filler, Other Processing Aids	ABS, EPS, HDPE, HIPS, LDPE, Other - Bioplastic, Other - Thermoplastic, PA, PC, PET, PP, PS, PUR, PVC	Agriculture, Automotive, Building & Construction, Electrical and Electronic Equipment, Food-contact plastics, Household items, furniture and other, Packaging, Textiles, Toys	1	13	Canada, China, EU, New Zealand, Nordic Countries, OECD, Philippines, Russia, South Korea, Taiwan, Turkey, United States, Vietnam	10000	10000	10000	1000	20000		1					1	1	0	0	1	0	1		1	2	1	high	0		USA Food Contact Materials Positive List (GRAS), Japan Food Contact Materials Postiive List	1	0	1	1
1113	'8007-24-7	Cashew nutshell liquid				Unspecified				Colorant, Filler, Intermediates, Other Processing Aids		Automotive	0	12	Canada, China, EU, New Zealand, Nordic Countries, OECD, Russia, South Korea, Taiwan, Turkey, United States, Vietnam	10000	100	100000	1000	110000	0	0	0	0	0	0	0	0	0	0	0	1	1		1	1	1	high	0		Japan Food Contact Materials Postiive List	1	0	0	1
1120	'8042-47-5	White mineral oil (petroleum)				Unspecified				Antistatic Agent, Biocide, Colorant, Crosslinking Agent, Filler, Intermediates, Light Stabilizer, Lubricant, Odor Agent, Other Processing Aids, Plasticizer		Agriculture, Automotive, Building & Construction, Electrical and Electronic Equipment, Food-contact plastics, Household items, furniture and other, Hygiene and Medical items, Packaging, Textiles, Toys	1	16	Canada, China, EU, Malaysia, Mexico, New Zealand, Nordic Countries, OECD, Philippines, Russia, South Korea, Taiwan, Thailand, Turkey, United States, Vietnam	100000	10000	1000000	1000	1100000		1					0.5	0	0.5	0	1	0	0		1	1.5	1	high	0		Japan Food Contact Materials Postiive List	1	0	0	1
1121	'80-43-3	Peroxide, bis(1-methyl-1-phenylethyl)	XMNIXWIUMCBBBL-UHFFFAOYSA-N	InChI=1S/C18H22O2/c1-17(2,15-11-7-5-8-12-15)19-20-18(3,4)16-13-9-6-10-14-16/h5-14H,1-4H3	CC(C)(OOC(C)(C)C1=CC=CC=C1)C1=CC=CC=C1	C18 H22 O2	270.162		82322-57-4, 88161-12-0, 188070-59-9, 209969-79-9, 246180-99-4, 478016-94-3, 945614-06-2, 2324106-99-0	Catalyst, Crosslinking Agent, Filler, Initiator, Intermediates, Lubricant, Other Processing Aids, Plasticizer, Viscosity Modifier	EPS, HDPE, LDPE, Other - Bioplastic, Other - Rubber, Other - Thermoplastic, PET, PP, PS, PUR	Automotive, Building & Construction, Electrical and Electronic Equipment, Food-contact plastics, Household items, furniture and other, Packaging, Textiles	1	16	Canada, China, EU, Japan, Malaysia, Mexico, Nordic Countries, OECD, Philippines, Russia, South Korea, Taiwan, Thailand, Turkey, United States, Vietnam	100000	1000	10000	1000	110000	0.5	0.5	0.5	0.5	0.5	0.5	0.5	0	0	0.5	1	1	0		1	2.5	1	high	0		USA Food Contact Materials Positive List (GRAS)	1	0	1	0
1122	'80-54-6	Benzenepropanal, 4-(1,1-dimethylethyl)-╬▒-methyl-	SDQFDHOLCGWZPU-UHFFFAOYSA-N	InChI=1/C14H20O/c1-11(10-15)9-12-5-7-13(8-6-12)14(2,3)4/h5-8,10-11H,9H2,1-4H3	CC(CC1=CC=C(C=C1)C(C)(C)C)C=O	C14 H20 O	204.151		39390-70-0, 75166-25-5	Odor Agent		Automotive, Building & Construction, Electrical and Electronic Equipment, Household items, furniture and other, Textiles	0	14	Canada, China, EU, Japan, Mexico, Nordic Countries, OECD, Philippines, South Korea, Taiwan, Thailand, Turkey, United States, Vietnam	10000	10	10000	1000	20000	0	0	0	0	0	0	1	0	0	1	0.5	0.5	1	0.5	1	2.5	1	high	1	EU Toys directive		0	0	0	0
1123	'80-62-6	2-Propenoic acid, 2-methyl-, methyl ester	VVQNEPGJFQJSBK-UHFFFAOYSA-N	InChI=1S/C5H8O2/c1-4(2)5(6)7-3/h1H2,2-3H3	COC(=O)C(C)=C	C5 H8 O2	100.052		162221-54-7, 211862-43-0, 220713-32-6, 874217-13-7, 1196968-39-4, 1227277-87-3, 1451188-71-8, 1453489-95-6	Biocide, Colorant, Crosslinking Agent, Filler, Intermediates, Light Stabilizer, Lubricant, Monomer, Other Processing Aids	ABS, Other - Thermoplastic, PET, PVC	Agriculture, Automotive, Building & Construction, Electrical and Electronic Equipment, Food-contact plastics, Household items, furniture and other, Hygiene and Medical items, Packaging, Textiles, Toys	1	17	Canada, China, EU, India, Japan, Malaysia, Mexico, Nordic Countries, OECD, Philippines, Russia, South Korea, Taiwan, Thailand, Turkey, United States, Vietnam	1000000	100000	10000000	1000	11000000		1					0.5	0	0	0.5	1	0.5	1		1	2	1	high	0		EU Food Contact Materials Positive List, USA Food Contact Materials Positive List (GRAS), Japan Food Contact Materials Postiive List	1	1	1	1
1127	'81782-77-6	3-Decen-5-ol, 4-methyl-	WSTQLNQRVZNEDV-UHFFFAOYSA-N	InChI=1/C11H22O/c1-4-6-7-9-11(12)10(3)8-5-2/h8,11-12H,4-7,9H2,1-3H3	CCCCCC(O)C(C)=CCC	C11 H22 O	170.167			Odor Agent			0	15	Canada, China, EU, Japan, Mexico, New Zealand, Nordic Countries, Philippines, Russia, South Korea, Taiwan, Thailand, Turkey, United States, Vietnam	1000	100	1000		2000		1					0	0	0	0	0	1	0		1	1	1	high	0			0	0	0	0
1128	'818-08-6	Stannane, dibutyloxo-	JGFBRKRYDCGYKD-UHFFFAOYSA-N	InChI=1S/2C4H9.O.Sn/c2*1-3-4-2;;/h2*1,3-4H2,2H3;;	CCCC[Sn](=O)CCCC	C8 H18 O Sn	250.038		144377-64-0, 695165-22-1	Catalyst, Colorant, Crosslinking Agent, Filler, Heat Stabilizer, Initiator, Intermediates, Light Stabilizer, Other Processing Aids		Automotive, Building & Construction, Electrical and Electronic Equipment, Food-contact plastics, Packaging, Textiles	1	15	Canada, China, EU, Japan, Malaysia, New Zealand, Nordic Countries, OECD, Philippines, South Korea, Taiwan, Thailand, Turkey, United States, Vietnam	10000	10	10000	1000	20000		1					1	0	0.5	1	1	1	0		1	3.5	1	high	1	Rotterdam Convention (EU PIC List), EU Toys directive	USA Food Contact Materials Positive List (GRAS)	1	0	1	0
1138	'870-08-6	Stannane, dioctyloxo-	LQRUPWUPINJLMU-UHFFFAOYSA-N	InChI=1S/2C8H17.O.Sn/c2*1-3-5-7-8-6-4-2;;/h2*1,3-8H2,2H3;;	CCCCCCCC[Sn](=O)CCCCCCCC	C16 H34 O Sn	362.163			Catalyst, Colorant, Crosslinking Agent, Filler, Initiator, Intermediates, Light Stabilizer, Other Processing Aids			0	14	China, EU, Japan, Malaysia, New Zealand, Nordic Countries, Philippines, Russia, South Korea, Taiwan, Thailand, Turkey, United States, Vietnam	10000	1	1000		11000		1					0.5	0	0	0.5	1	0	0		1	1.5	1	high	1	Rotterdam Convention (EU PIC List), EU Toys directive	USA Food Contact Materials Positive List (GRAS)	1	0	1	0
1139	'872-50-4	2-Pyrrolidinone, 1-methyl-	SECXISVLQFMRJM-UHFFFAOYSA-N	InChI=1S/C5H9NO/c1-6-4-2-3-5(6)7/h2-4H2,1H3	CN1CCCC1=O	C5 H9 N O	99.0684		26138-58-9, 53774-35-9, 57762-46-6	Colorant, Crosslinking Agent, Filler, Intermediates, Light Stabilizer, Lubricant, Other Processing Aids, Solvent	Other - Thermoplastic, PA	Agriculture, Automotive, Building & Construction, Electrical and Electronic Equipment, Food-contact plastics, Household items, furniture and other, Hygiene and Medical items, Packaging, Textiles, Toys	1	16	Canada, China, EU, Japan, Malaysia, Mexico, Nordic Countries, OECD, Philippines, Russia, South Korea, Taiwan, Thailand, Turkey, United States, Vietnam	100000	10000	1000000	1000	1100000		1					1	0	0	1	1	0	0		1	2	1	high	1	EU REACH Restriction, EU REACH SVHC, USA - California Proposition 65, Korea REACH Authorisation	EU Food Contact Materials Positive List, USA Food Contact Materials Positive List (GRAS), Japan Food Contact Materials Postiive List	1	1	1	1
1149	'92704-41-1	Calcined kaolin				Unspecified			39388-40-4, 1505447-37-9, 1505447-47-1, 1505447-71-1	Colorant, Filler, Lubricant, Other Processing Aids	HDPE, LDPE, Other - Thermoplastic, PA, PP, PVC	Agriculture, Automotive, Building & Construction, Electrical and Electronic Equipment, Food-contact plastics, Household items, furniture and other, Packaging, Textiles	1	12	Canada, China, EU, New Zealand, Nordic Countries, OECD, Philippines, South Korea, Taiwan, Turkey, United States, Vietnam	10000	1000	10000000	1000	10010000		1					0	0	0	0	1	0	1		1	1	1	high	0		EU Food Contact Materials Positive List, Japan Food Contact Materials Postiive List	1	1	0	1
1156	'94-36-0	Peroxide, dibenzoyl	OMPJBNCRMGITSC-UHFFFAOYSA-N	InChI=1S/C14H10O4/c15-13(11-7-3-1-4-8-11)17-18-14(16)12-9-5-2-6-10-12/h1-10H	O=C(OOC(=O)C1=CC=CC=C1)C1=CC=CC=C1	C14 H10 O4	242.058		37370-29-9, 117989-71-6, 132323-44-5, 143928-58-9	Catalyst, Colorant, Crosslinking Agent, Filler, Initiator, Intermediates, Other Processing Aids, Plasticizer	EPS, LDPE, Other - Thermoplastic, PET, PS	Agriculture, Automotive, Building & Construction, Electrical and Electronic Equipment, Food-contact plastics, Hygiene and Medical items, Packaging, Textiles	1	17	Canada, China, EU, Japan, Malaysia, Mexico, New Zealand, Nordic Countries, OECD, Philippines, Russia, South Korea, Taiwan, Thailand, Turkey, United States, Vietnam	10000	1000	100000	1000	110000		1					0	0	0	0	0	1	0		1	1	1	high	1	Korea REACH Authorisation	USA Food Contact Materials Positive List (GRAS)	1	0	1	0
1158	'95-54-5	1,2-Benzenediamine	GEYOCULIXLDCMW-UHFFFAOYSA-N	InChI=1S/C6H8N2/c7-5-3-1-2-4-6(5)8/h1-4H,7-8H2	NC1=C(N)C=CC=C1	C6 H8 N2	108.069			Biocide, Colorant, Intermediates, Lubricant, Other Processing Aids	PA	Automotive, Electrical and Electronic Equipment	0	12	Canada, China, EU, Japan, Nordic Countries, OECD, Philippines, South Korea, Taiwan, Thailand, United States, Vietnam	10	1	10000	1000	10010		1					1	1	0.5	0	0.5	1	0		1	3	1	high	1	USA - California Proposition 65, Korea REACH Authorisation		0	0	0	0
1160	'96-33-3	2-Propenoic acid, methyl ester	BAPJBEWLBFYGME-UHFFFAOYSA-N	InChI=1S/C4H6O2/c1-3-4(5)6-2/h3H,1H2,2H3	COC(=O)C=C	C4 H6 O2	86.0368		102256-29-1, 1254182-69-8	Intermediates, Monomer, Other Processing Aids, Plasticizer, Solvent	ABS, HDPE, LDPE, Other - Thermoplastic	Automotive, Building & Construction, Electrical and Electronic Equipment, Food-contact plastics, Packaging, Textiles	1	15	Canada, China, EU, Malaysia, Mexico, Nordic Countries, OECD, Philippines, Russia, South Korea, Taiwan, Thailand, Turkey, United States, Vietnam	100000	10	100000	1000	200000		1					0.5	0.5	0.5	0	1	0.5	0		1	2.5	1	high	0		EU Food Contact Materials Positive List, USA Food Contact Materials Positive List (GRAS), Japan Food Contact Materials Postiive List	1	1	1	1
1163	'97-90-5	2-Propenoic acid, 2-methyl-, 1,1'-(1,2-ethanediyl) ester	STVZJERGLQHEKB-UHFFFAOYSA-N	InChI=1S/C10H14O4/c1-7(2)9(11)13-5-6-14-10(12)8(3)4/h1,3,5-6H2,2,4H3	CC(=C)C(=O)OCCOC(=O)C(C)=C	C10 H14 O4	198.089		37211-46-4, 51026-92-7, 56480-56-9, 81897-47-4, 108772-05-0, 121266-93-1, 121978-90-3, 130865-23-5, 135623-36-8, 138454-60-1, 138533-09-2, 154855-14-8, 156940-26-0, 205501-13-9, 256439-71-1, 930792-25-9, 1134189-44-8, 1205547-89-2, 1552289-42-5, 1623115-14-9, 1803532-84-4	Crosslinking Agent, Filler, Initiator, Intermediates, Monomer, Other Processing Aids	Other - Thermoplastic	Building & Construction, Electrical and Electronic Equipment, Food-contact plastics, Hygiene and Medical items, Packaging, Textiles	1	14	Canada, China, EU, Japan, Mexico, Nordic Countries, OECD, Philippines, South Korea, Taiwan, Thailand, Turkey, United States, Vietnam	10000	10	10000	1000	20000		1					0	0	0	0	1	0	0		1	1	1	high	0		EU Food Contact Materials Positive List, USA Food Contact Materials Positive List (GRAS), Japan Food Contact Materials Postiive List	1	1	1	1
1165	'98-29-3	1,2-Benzenediol, 4-(1,1-dimethylethyl)-	XESZUVZBAMCAEJ-UHFFFAOYSA-N	InChI=1S/C10H14O2/c1-10(2,3)7-4-5-8(11)9(12)6-7/h4-6,11-12H,1-3H3	CC(C)(C)C1=CC(O)=C(O)C=C1	C10 H14 O2	166.099		71210-63-4	Antioxidant, Catalyst, Colorant, Filler, Initiator, Other Processing Aids	ABS, Other - Rubber, PS, PVC	Automotive, Building & Construction, Electrical and Electronic Equipment, Food-contact plastics, Household items, furniture and other, Packaging, Textiles	1	15	Canada, China, EU, Japan, Malaysia, Nordic Countries, OECD, Philippines, Russia, South Korea, Taiwan, Thailand, Turkey, United States, Vietnam	10000	100	10000	1000	20000		1					0.5	0.5	0	0.5	0	1	0		1	2	1	high	0		USA Food Contact Materials Positive List (GRAS), Japan Food Contact Materials Postiive List	1	0	1	1
1167	'98-83-9	Benzene, (1-methylethenyl)-	XYLMUPLGERFSHI-UHFFFAOYSA-N	InChI=1S/C9H10/c1-8(2)9-6-4-3-5-7-9/h3-7H,1H2,2H3	CC(=C)C1=CC=CC=C1	C9 H10	118.078		2256721-46-5	Colorant, Filler, Intermediates, Monomer, Odor Agent, Other Processing Aids, Plasticizer	ABS, PET	Automotive, Building & Construction, Electrical and Electronic Equipment, Food-contact plastics, Household items, furniture and other, Packaging, Textiles	1	15	Canada, China, EU, Japan, Malaysia, Mexico, Nordic Countries, OECD, Philippines, South Korea, Taiwan, Thailand, Turkey, United States, Vietnam	1000000	1000	100000	1000	1100000		1					0.5	0.5	0.5	0.5	1	0.5	0		1	3	1	high	1	USA - California Proposition 65	EU Food Contact Materials Positive List, USA Food Contact Materials Positive List (GRAS), Japan Food Contact Materials Postiive List	1	1	1	1
1168	'98-88-4	Benzoyl chloride	PASDCCFISLVPSO-UHFFFAOYSA-N	InChI=1S/C7H5ClO/c8-7(9)6-4-2-1-3-5-6/h1-5H	ClC(=O)C1=CC=CC=C1	C7 H5 Cl O	140.003		1258517-80-4, 1640987-68-3, 2231811-43-9	Colorant, Crosslinking Agent, Filler, Intermediates, Other Processing Aids, Plasticizer		Automotive, Building & Construction, Food-contact plastics, Packaging	1	14	Canada, China, EU, Japan, Malaysia, Mexico, Nordic Countries, OECD, Philippines, South Korea, Taiwan, Thailand, United States, Vietnam	100000	10	100000	1000	200000		1					0.5	0.5	0	0.5	1	1	0		1	3	1	high	0		USA Food Contact Materials Positive List (GRAS), Japan Food Contact Materials Postiive List	1	0	1	1
1173	'100-44-7	Benzene, (chloromethyl)-	KCXMKQUNVWSEMD-UHFFFAOYSA-N	InChI=1S/C7H7Cl/c8-6-7-4-2-1-3-5-7/h1-5H,6H2	ClCC1=CC=CC=C1	C7 H7 Cl	126.024			Colorant, Intermediates, Lubricant, Other Processing Aids, Plasticizer		Agriculture, Automotive, Electrical and Electronic Equipment, Textiles	0	16	Canada, China, EU, Japan, Malaysia, Mexico, Nordic Countries, OECD, Philippines, Russia, South Korea, Taiwan, Thailand, Turkey, United States, Vietnam	100	100	100000	1000	100100		1					1	1	0	0.5	1	1	0		1	3.5	1	high	1	USA - California Proposition 65		0	0	0	0
1177	'10022-31-8	Nitric acid, barium salt (2:1)	IWOUKMZUPDVPGQ-UHFFFAOYSA-N	InChI=1S/Ba.2NO3/c;2*2-1(3)4/q+2;2*-1	[Ba++].[O-][N+]([O-])=O.[O-][N+]([O-])=O	Ba . 2 H N O3	261.881			Other Processing Aids		Automotive, Building & Construction, Food-contact plastics, Household items, furniture and other, Packaging	1	15	Canada, China, EU, Japan, Mexico, Nordic Countries, OECD, Philippines, Russia, South Korea, Taiwan, Thailand, Turkey, United States, Vietnam	10000	1	10000	1000	20000		1					0	0	0	0	1	0	0		1	1	1	high	1	EU Toys directive	EU Food Contact Materials Positive List	1	1	0	0
1178	'10025-73-7	Chromium chloride (CrCl3)	QSWDMMVNRMROPK-UHFFFAOYSA-K	InChI=1S/3ClH.Cr/h3*1H;/q;;;+3/p-3	Cl[Cr](Cl)Cl	Cl3 Cr	156.847			Intermediates		Food-contact plastics, Packaging	1	15	Canada, China, EU, Japan, Mexico, New Zealand, Nordic Countries, Philippines, Russia, South Korea, Taiwan, Thailand, Turkey, United States, Vietnam	1000	10	1000		2000		1					0	0	0	0	0.5	1	1		1	1.5	1	high	0			0	0	0	0
1179	'10025-87-3	Phosphoric trichloride	XHXFXVLFKHQFAL-UHFFFAOYSA-N	InChI=1S/Cl3OP/c1-5(2,3)4	ClP(Cl)(Cl)=O	Cl3 O P	151.875		39380-77-3, 1258871-72-5	Colorant, Intermediates, Other Processing Aids		Electrical and Electronic Equipment, Food-contact plastics, Packaging	1	14	Canada, China, EU, Japan, Malaysia, Mexico, Nordic Countries, OECD, Philippines, South Korea, Taiwan, Thailand, United States, Vietnam	100	100	100000	1000	100100		1					0	0	0	0	1	0.5	0		1	1.5	1	high	1	Korea REACH Authorisation	USA Food Contact Materials Positive List (GRAS)	1	0	1	0
1181	'10035-10-6	Hydrobromic acid	CPELXLSAUQHCOX-UHFFFAOYSA-N	InChI=1S/BrH/h1H	Br	Br H	79.9262		62140-56-1	Intermediates, Lubricant, Other Processing Aids		Agriculture, Electrical and Electronic Equipment, Textiles	0	17	Canada, China, EU, India, Japan, Malaysia, Mexico, Nordic Countries, OECD, Philippines, Russia, South Korea, Taiwan, Thailand, Turkey, United States, Vietnam	100000	10	1000000	1000	1100000		1					1	0	1	1	1	0	0		1	3	1	high	1	Korea REACH Authorisation		0	0	0	0
1183	'10039-54-0	Hydroxylamine, sulfate (2:1)	VGYYSIDKAKXZEE-UHFFFAOYSA-L	InChI=1S/2H4NO.H2O4S/c2*1-2;1-5(2,3)4/h2*2H,1H3;(H2,1,2,3,4)/q2*+1;/p-2	[NH3+]O.[NH3+]O.[O-]S([O-])(=O)=O	H3 N O . 1/2 H2 O4 S	164.01		120893-78-9, 1257422-90-4	Antioxidant, Catalyst, Colorant, Crosslinking Agent, Initiator, Light Stabilizer, Lubricant, Other Processing Aids	PA	Building & Construction, Electrical and Electronic Equipment, Food-contact plastics, Household items, furniture and other, Packaging, Textiles	1	15	Canada, China, EU, India, Malaysia, Mexico, Nordic Countries, OECD, Philippines, South Korea, Taiwan, Thailand, Turkey, United States, Vietnam	10000	10	10000000	1000	10010000		1					0.5	0.5	0	0	1	1	0		1	2.5	1	high	1	Korea REACH Authorisation	USA Food Contact Materials Positive List (GRAS)	1	0	1	0
1184	'10043-01-3	Sulfuric acid, aluminum salt (3:2)	DIZPMCHEQGEION-UHFFFAOYSA-H	InChI=1S/2Al.3H2O4S/c;;3*1-5(2,3)4/h;;3*(H2,1,2,3,4)/q2*+3;;;/p-6	[Al+3].[Al+3].[O-]S([O-])(=O)=O.[O-]S([O-])(=O)=O.[O-]S([O-])(=O)=O	Al . 3/2 H2 O4 S	341.818	10124-29-5	19239-71-5, 22515-37-3, 66578-72-1, 121739-79-5, 124027-27-6, 139939-73-4, 1937262-06-0	Antistatic Agent, Catalyst, Colorant, Crosslinking Agent, Filler, Intermediates, Other Processing Aids		Agriculture, Automotive, Building & Construction, Electrical and Electronic Equipment, Food-contact plastics, Household items, furniture and other, Packaging, Textiles, Toys	1	16	Canada, China, EU, Japan, Malaysia, Mexico, Nordic Countries, OECD, Philippines, Russia, South Korea, Taiwan, Thailand, Turkey, United States, Vietnam	1000000	100000	10000000	1000	11000000		1					0	0	0	0	0	1	0		1	1	1	high	1	EU Toys directive	USA Food Contact Materials Positive List (GRAS), Japan Food Contact Materials Postiive List	1	0	1	1
1187	'101-02-0	Phosphorous acid, triphenyl ester	HVLLSGMXQDNUAL-UHFFFAOYSA-N	InChI=1S/C18H15O3P/c1-4-10-16(11-5-1)19-22(20-17-12-6-2-7-13-17)21-18-14-8-3-9-15-18/h1-15H	O(P(OC1=CC=CC=C1)OC1=CC=CC=C1)C1=CC=CC=C1	C18 H15 O3 P	310.076			Antioxidant, Colorant, Crosslinking Agent, Filler, Heat Stabilizer, Intermediates, Light Stabilizer, Lubricant, Other Processing Aids	HDPE, LDPE, Other - Rubber, PET, PP, PUR, PVC	Agriculture, Automotive, Building & Construction, Electrical and Electronic Equipment, Food-contact plastics, Household items, furniture and other, Packaging, Textiles, Toys	1	16	Canada, China, EU, Japan, Malaysia, Mexico, Nordic Countries, OECD, Philippines, Russia, South Korea, Taiwan, Thailand, Turkey, United States, Vietnam	10000	10	100000	1000	110000	0	0	0	0	0	0	0	0	0	0	0.5	1	0		1	1.5	1	high	0		USA Food Contact Materials Positive List (GRAS), Japan Food Contact Materials Postiive List	1	0	1	1
1192	'101-72-4	1,4-Benzenediamine, N1-(1-methylethyl)-N4-phenyl-	OUBMGJOQLXMSNT-UHFFFAOYSA-N	InChI=1S/C15H18N2/c1-12(2)16-14-8-10-15(11-9-14)17-13-6-4-3-5-7-13/h3-12,16-17H,1-2H3	CC(C)NC1=CC=C(NC2=CC=CC=C2)C=C1	C15 H18 N2	226.147		12771-90-3, 59792-63-1, 87133-56-0, 121889-80-3	Antioxidant, Light Stabilizer, Other Processing Aids	Other - Rubber	Food-contact plastics, Packaging	1	14	Canada, China, EU, Japan, Nordic Countries, OECD, Philippines, Russia, South Korea, Taiwan, Thailand, Turkey, United States, Vietnam	10000	10	1000	1000	11000		1					0	0	0	0	1	1	0		1	2	1	high	0		USA Food Contact Materials Positive List (GRAS)	1	0	1	0
1193	'101-80-4	Benzenamine, 4,4'-oxybis-	HLBLWEWZXPIGSM-UHFFFAOYSA-N	InChI=1S/C12H12N2O/c13-9-1-5-11(6-2-9)15-12-7-3-10(14)4-8-12/h1-8H,13-14H2	NC1=CC=C(OC2=CC=C(N)C=C2)C=C1	C12 H12 N2 O	200.095		121509-79-3, 928208-61-1	Catalyst, Colorant, Crosslinking Agent, Initiator, Intermediates, Monomer, Other Processing Aids, Plasticizer	PUR	Automotive, Building & Construction, Electrical and Electronic Equipment, Packaging, Textiles	0	15	China, EU, Japan, Malaysia, Mexico, New Zealand, Nordic Countries, OECD, Philippines, Russia, South Korea, Taiwan, Thailand, United States, Vietnam	100	0	10000	1000	10100		1					1	1	1	0.5	1	1	0		1	4.5	1	high	1	EU REACH SVHC, USA - California Proposition 65		0	0	0	0
1194	'101-83-7	Cyclohexanamine, N-cyclohexyl-	XBPCUCUWBYBCDP-UHFFFAOYSA-N	InChI=1S/C12H23N/c1-3-7-11(8-4-1)13-12-9-5-2-6-10-12/h11-13H,1-10H2	C1CCC(CC1)NC1CCCCC1	C12 H23 N	181.183		111487-88-8, 111487-93-5, 111522-94-2, 157973-63-2, 856793-27-6, 878781-89-6	Intermediates, Lubricant		Building & Construction, Electrical and Electronic Equipment, Food-contact plastics, Packaging	1	16	Canada, China, EU, Japan, Malaysia, Mexico, Nordic Countries, OECD, Philippines, Russia, South Korea, Taiwan, Thailand, Turkey, United States, Vietnam	10000	10	10000	1000	20000		1					0.5	0	0	0.5	0.5	1	0		1	2	1	high	0		USA Food Contact Materials Positive List (GRAS)	1	0	1	0
1195	'101-86-0	Octanal, 2-(phenylmethylene)-	GUUHFMWKWLOQMM-UHFFFAOYSA-N	InChI=1S/C15H20O/c1-2-3-4-6-11-15(13-16)12-14-9-7-5-8-10-14/h5,7-10,12-13H,2-4,6,11H2,1H3	CCCCCCC(C=O)=CC1=CC=CC=C1	C15 H20 O	216.151						0	14	Canada, China, EU, Japan, Nordic Countries, OECD, Philippines, Russia, South Korea, Taiwan, Thailand, Turkey, United States, Vietnam		10	100000	1000	100010		1					0	0	0	0	0	1	0		1	1	1	high	1	EU Toys directive	USA Food Contact Materials Positive List (GRAS)	1	0	1	0
1201	'10124-37-5	Nitric acid, calcium salt (2:1)	ZCCIPPOKBCJFDN-UHFFFAOYSA-N	InChI=1S/Ca.2NO3/c;2*2-1(3)4/q+2;2*-1	[Ca++].[O-][N+]([O-])=O.[O-][N+]([O-])=O	Ca . 2 H N O3	163.938		56532-05-9, 94079-75-1, 95680-75-4, 260792-08-3, 292135-47-8	Colorant, Crosslinking Agent, Intermediates, Other Processing Aids		Agriculture, Building & Construction, Food-contact plastics, Packaging, Textiles	1	15	Canada, China, EU, Japan, Malaysia, Mexico, Nordic Countries, OECD, Philippines, South Korea, Taiwan, Thailand, Turkey, United States, Vietnam	1000000	100000	1000000	1000	2000000		1					0	0	0	0	1	1	1		1	2	1	high	0		USA Food Contact Materials Positive List (GRAS)	1	0	1	0
1204	'101316-72-7	Lubricating oils (petroleum), C24-50, solvent-extd., dewaxed, hydrogenated				Unspecified				Lubricant		Agriculture, Automotive, Building & Construction, Textiles	0	11	China, EU, New Zealand, Nordic Countries, OECD, Philippines, Russia, South Korea, Taiwan, Turkey, Vietnam	1000000	10000		1000	1000000		1					1	1	0	1	0.5	0	0		1	2.5	1	high	0			0	0	0	0
1208	'102-09-0	Carbonic acid, diphenyl ester	ROORDVPLFPIABK-UHFFFAOYSA-N	InChI=1S/C13H10O3/c14-13(15-11-7-3-1-4-8-11)16-12-9-5-2-6-10-12/h1-10H	O=C(OC1=CC=CC=C1)OC1=CC=CC=C1	C13 H10 O3	214.063		98287-56-0	Intermediates, Monomer	PC	Electrical and Electronic Equipment, Food-contact plastics, Packaging	1	13	Canada, China, EU, Japan, New Zealand, Nordic Countries, OECD, Philippines, Russia, South Korea, Taiwan, United States, Vietnam	1000000	0		1000	1000000		1					0	0	0	0	0	1	0		1	1	1	high	0		EU Food Contact Materials Positive List, USA Food Contact Materials Positive List (GRAS), Japan Food Contact Materials Postiive List	1	1	1	1
1212	'102-77-2	Benzothiazole, 2-(4-morpholinylthio)-	MHKLKWCYGIBEQF-UHFFFAOYSA-N	InChI=1S/C11H12N2OS2/c1-2-4-10-9(3-1)12-11(15-10)16-13-5-7-14-8-6-13/h1-4H,5-8H2	C1CN(CCO1)SC1=NC2=C(S1)C=CC=C2	C11 H12 N2 O S2	252.039	19224-23-8	31440-29-6, 35309-99-0, 40860-79-5, 108251-60-1, 182077-65-2, 198352-30-6, 909403-78-7	Catalyst, Crosslinking Agent, Initiator, Other Processing Aids		Food-contact plastics, Household items, furniture and other, Packaging, Textiles	1	15	Canada, China, EU, Japan, Mexico, Nordic Countries, OECD, Philippines, Russia, South Korea, Taiwan, Thailand, Turkey, United States, Vietnam	10	10	10000	1000	10010		1					0	0	0	0	0	1	0		1	1	1	high	0		USA Food Contact Materials Positive List (GRAS)	1	0	1	0
1216	'10213-78-2	Ethanol, 2,2'-(octadecylimino)bis-	NDLNTMNRNCENRZ-UHFFFAOYSA-N	InChI=1S/C22H47NO2/c1-2-3-4-5-6-7-8-9-10-11-12-13-14-15-16-17-18-23(19-21-24)20-22-25/h24-25H,2-22H2,1H3	CCCCCCCCCCCCCCCCCCN(CCO)CCO	C22 H47 N O2	357.361		53789-65-4, 135061-88-0, 176708-39-7, 374677-09-5	Antistatic Agent, Other Processing Aids	HDPE, LDPE, PP	Automotive, Food-contact plastics, Packaging, Textiles	1	12	Canada, China, EU, Japan, New Zealand, Nordic Countries, Philippines, Russia, South Korea, Taiwan, United States, Vietnam	1000	0	10000		11000		1					0	0	0	0	0	1	0		1	1	1	high	0		USA Food Contact Materials Positive List (GRAS), Japan Food Contact Materials Postiive List	1	0	1	1
1218	'10222-01-2	Acetamide, 2,2-dibromo-2-cyano-	UUIVKBHZENILKB-UHFFFAOYSA-N	InChI=1S/C3H2Br2N2O/c4-3(5,1-6)2(7)8/h(H2,7,8)	NC(=O)C(Br)(Br)C#N	C3 H2 Br2 N2 O	239.853		63619-09-0, 1838552-16-1	Biocide		Automotive, Building & Construction, Electrical and Electronic Equipment, Textiles	0	14	China, EU, Japan, Malaysia, Mexico, Nordic Countries, Philippines, Russia, South Korea, Taiwan, Thailand, Turkey, United States, Vietnam		1000	1000		2000		1					0	0	0	0	0.5	1	0	0.5	1	2	1	high	0		USA Food Contact Materials Positive List (GRAS), Japan Food Contact Materials Postiive List	1	0	1	1
1220	'10287-53-3	Benzoic acid, 4-(dimethylamino)-, ethyl ester	FZUGPQWGEGAKET-UHFFFAOYSA-N	InChI=1S/C11H15NO2/c1-4-14-11(13)9-5-7-10(8-6-9)12(2)3/h5-8H,4H2,1-3H3	CCOC(=O)C1=CC=C(C=C1)N(C)C	C11 H15 N O2	193.11		97003-31-1, 207575-35-7	Colorant, Filler, Other Processing Aids		Electrical and Electronic Equipment, Hygiene and Medical items	0	14	Canada, China, EU, Japan, New Zealand, Nordic Countries, Philippines, Russia, South Korea, Taiwan, Thailand, Turkey, United States, Vietnam	100000	10	-1		100000		1					1	0	0	1	0	0	0		1	1	1	high	0			0	0	0	0
1226	'103-71-9	Benzene, isocyanato-	DGTNSSLYPYDJGL-UHFFFAOYSA-N	InChI=1S/C7H5NO/c9-6-8-7-4-2-1-3-5-7/h1-5H	O=C=NC1=CC=CC=C1	C7 H5 N O	119.037		1025436-18-3	Crosslinking Agent, Filler, Intermediates, Other Processing Aids		Building & Construction, Electrical and Electronic Equipment, Household items, furniture and other, Packaging, Textiles	0	15	Canada, China, EU, Japan, Mexico, New Zealand, Nordic Countries, OECD, Philippines, Russia, South Korea, Taiwan, Thailand, United States, Vietnam		0	1000	1000	1000		1					0.5	0.5	0	0	1	1	1		1	2.5	1	high	0			0	0	0	0
1228	'103-90-2	Acetamide, N-(4-hydroxyphenyl)-	RZVAJINKPMORJF-UHFFFAOYSA-N	InChI=1S/C8H9NO2/c1-6(10)9-7-2-4-8(11)5-3-7/h2-5,11H,1H3,(H,9,10)	CC(=O)NC1=CC=C(O)C=C1	C8 H9 N O2	151.063		8055-08-1, 719293-04-6, 1430221-00-3	Intermediates, Monomer	PET	Food-contact plastics, Packaging	1	16	Canada, China, EU, Japan, Malaysia, Mexico, Nordic Countries, OECD, Philippines, Russia, South Korea, Taiwan, Thailand, Turkey, United States, Vietnam	100	100		1000	1000		1					0.5	0.5	0.5	0	1	0.5	1		1	2.5	1	high	0		EU Food Contact Materials Positive List	1	1	0	0
1234	'10377-60-3	Nitric acid, magnesium salt (2:1)	YIXJRHPUWRPCBB-UHFFFAOYSA-N	InChI=1S/Mg.2NO3/c;2*2-1(3)4/q+2;2*-1	[Mg++].[O-][N+]([O-])=O.[O-][N+]([O-])=O	H N O3 . 1/2 Mg	147.961		50908-84-4	Antioxidant, Biocide, Colorant, Filler, Intermediates, Light Stabilizer, Lubricant, Other Processing Aids		Agriculture, Automotive, Building & Construction, Electrical and Electronic Equipment, Food-contact plastics, Household items, furniture and other, Packaging, Textiles, Toys	1	17	Canada, China, EU, Japan, Malaysia, Mexico, New Zealand, Nordic Countries, OECD, Philippines, Russia, South Korea, Taiwan, Thailand, Turkey, United States, Vietnam	1000000	100	100000	1000	1100000		1					1	1	0	0	1	0	0		1	2	1	high	0		USA Food Contact Materials Positive List (GRAS), Japan Food Contact Materials Postiive List	1	0	1	1
1236	'104-15-4	Benzenesulfonic acid, 4-methyl-	JOXIMZWYDAKGHI-UHFFFAOYSA-N	InChI=1S/C7H8O3S/c1-6-2-4-7(5-3-6)11(8,9)10/h2-5H,1H3,(H,8,9,10)	CC1=CC=C(C=C1)S(O)(=O)=O	C7 H8 O3 S	172.019	25231-46-3, 633305-48-3	402-47-1, 51506-29-7, 100901-72-2, 114213-96-6, 119314-18-0, 126033-27-0, 128739-80-0, 144647-92-7, 156627-46-2, 185568-48-3, 210357-81-6, 227313-49-7, 369371-25-5, 613262-31-0, 1023356-14-0	Catalyst, Colorant, Crosslinking Agent, Filler, Lubricant, Other Processing Aids		Agriculture, Automotive, Building & Construction, Electrical and Electronic Equipment, Food-contact plastics, Household items, furniture and other, Packaging, Textiles	1	16	Canada, China, EU, Japan, Mexico, New Zealand, Nordic Countries, OECD, Philippines, Russia, South Korea, Taiwan, Thailand, Turkey, United States, Vietnam	100000	1000	100000	1000	200000		1					1	0	0	1	0	0	0		1	1	1	high	0		USA Food Contact Materials Positive List (GRAS), Japan Food Contact Materials Postiive List	1	0	1	1
1249	'105-60-2	2H-Azepin-2-one, hexahydro-	JBKVHLHDHHXQEQ-UHFFFAOYSA-N	InChI=1S/C6H11NO/c8-6-4-2-1-3-5-7-6/h1-5H2,(H,7,8)	O=C1CCCCCN1	C6 H11 N O	113.084		2953-03-9, 32838-21-4, 32838-23-6, 34876-18-1, 117955-36-9, 168214-28-6	Catalyst, Colorant, Filler, Intermediates, Monomer, Other Processing Aids, Plasticizer, Solvent	HDPE, LDPE, PA, PP	Building & Construction, Electrical and Electronic Equipment, Food-contact plastics, Household items, furniture and other, Packaging, Textiles	1	15	Canada, China, EU, Japan, Malaysia, Mexico, Nordic Countries, OECD, Philippines, South Korea, Taiwan, Thailand, Turkey, United States, Vietnam	10000000	1000	10000000	1000	20000000		1					0.5	0	0	0.5	1	0	0		1	1.5	1	high	0		EU Food Contact Materials Positive List, USA Food Contact Materials Positive List (GRAS), Japan Food Contact Materials Postiive List	1	1	1	1
1253	'105-76-0	2-Butenedioic acid (2Z)-, 1,4-dibutyl ester	JBSLOWBPDRZSMB-FPLPWBNLSA-N	InChI=1S/C12H20O4/c1-3-5-9-15-11(13)7-8-12(14)16-10-6-4-2/h7-8H,3-6,9-10H2,1-2H3/b8-7-	CCCCOC(=O)\C=C/C(=O)OCCCC	C12 H20 O4	228.136		57343-98-3, 77223-90-6, 79725-21-6, 193362-56-0, 220713-30-4	Colorant, Filler, Intermediates, Other Processing Aids, Plasticizer		Building & Construction, Electrical and Electronic Equipment, Food-contact plastics, Packaging, Textiles	1	14	Canada, China, EU, Japan, Mexico, Nordic Countries, OECD, Philippines, South Korea, Taiwan, Thailand, Turkey, United States, Vietnam	10000	100	1000	1000	11000		1					0	0	0	0	0.5	1	0		1	1.5	1	high	0		USA Food Contact Materials Positive List (GRAS), Japan Food Contact Materials Postiive List	1	0	1	1
1266	'106-42-3	Benzene, 1,4-dimethyl-	URLKBWYHVLBVBO-UHFFFAOYSA-N	InChI=1S/C8H10/c1-7-3-5-8(2)6-4-7/h3-6H,1-2H3	CC1=CC=C(C)C=C1	C8 H10	106.078			Antistatic Agent, Biocide, Colorant, Filler, Intermediates, Lubricant, Odor Agent, Other Processing Aids	Other - Bioplastic, PA, PET	Automotive, Building & Construction, Electrical and Electronic Equipment, Textiles, Toys	0	16	Canada, China, EU, Japan, Malaysia, Mexico, Nordic Countries, OECD, Philippines, Russia, South Korea, Taiwan, Thailand, Turkey, United States, Vietnam	10000000	1000	10000000	1000	20000000		1					1	0	0	1	0.5	0.5	0		1	2	1	high	1	Korea REACH Authorisation		0	0	0	0
1267	'106-44-5	Phenol, 4-methyl-	IWDCLRJOBJJRNH-UHFFFAOYSA-N	InChI=1S/C7H8O/c1-6-2-4-7(8)5-3-6/h2-5,8H,1H3	CC1=CC=C(O)C=C1	C7 H8 O	108.058			Biocide, Colorant, Intermediates, Monomer, Odor Agent, Other Processing Aids, Plasticizer		Electrical and Electronic Equipment, Food-contact plastics, Household items, furniture and other, Packaging, Textiles	1	14	Canada, China, EU, Japan, Mexico, Nordic Countries, OECD, Philippines, Russia, South Korea, Taiwan, Thailand, United States, Vietnam	10000	10	100000	1000	110000		1					0.5	0.5	0	0	1	0.5	0	0	1	2	1	high	1	Korea REACH Authorisation	EU Food Contact Materials Positive List, USA Food Contact Materials Positive List (GRAS), Japan Food Contact Materials Postiive List	1	1	1	1
1268	'106-50-3	1,4-Benzenediamine	CBCKQZAAMUWICA-UHFFFAOYSA-N	InChI=1S/C6H8N2/c7-5-1-2-6(8)4-3-5/h1-4H,7-8H2	NC1=CC=C(N)C=C1	C6 H8 N2	108.069		56481-76-6, 82785-55-5	Catalyst, Colorant, Crosslinking Agent, Initiator, Intermediates, Monomer	PA	Automotive, Food-contact plastics, Packaging	1	16	Canada, China, EU, Japan, Malaysia, Mexico, Nordic Countries, OECD, Philippines, Russia, South Korea, Taiwan, Thailand, Turkey, United States, Vietnam	100000	10	-1	1000	100000		1					0	0	0	0	1	1	1		1	2	1	high	1	Korea REACH Authorisation	USA Food Contact Materials Positive List (GRAS)	1	0	1	0
1272	'106-89-8	Oxirane, 2-(chloromethyl)-	BRLQWZUYTZBJKN-UHFFFAOYSA-N	InChI=1/C3H5ClO/c4-1-3-2-5-3/h3H,1-2H2	ClCC1CO1	C3 H5 Cl O	92.0029		9009-12-5, 13403-37-7, 36250-81-4, 109351-74-8	Colorant, Crosslinking Agent, Filler, Intermediates, Light Stabilizer, Lubricant, Monomer, Other Processing Aids		Agriculture, Automotive, Building & Construction, Electrical and Electronic Equipment, Food-contact plastics, Household items, furniture and other, Hygiene and Medical items, Packaging, Textiles	1	17	Canada, China, EU, India, Japan, Malaysia, Mexico, Nordic Countries, OECD, Philippines, Russia, South Korea, Taiwan, Thailand, Turkey, United States, Vietnam	1000000	10000	1000000	1000	2000000		1					1	1	1	0.5	1	0.5	1		1	4	1	high	1	USA - California Proposition 65, Korea REACH Authorisation	EU Food Contact Materials Positive List, USA Food Contact Materials Positive List (GRAS), Japan Food Contact Materials Postiive List	1	1	1	1
1273	'106-91-2	2-Propenoic acid, 2-methyl-, 2-oxiranylmethyl ester	VOZRXNHHFUQHIL-UHFFFAOYSA-N	InChI=1/C7H10O3/c1-5(2)7(8)10-4-6-3-9-6/h6H,1,3-4H2,2H3	CC(=C)C(=O)OCC1CO1	C7 H10 O3	142.063		55279-88-4, 89678-75-1, 96778-02-8, 98104-93-9, 117955-24-5, 122785-80-2, 126872-19-3, 169957-95-3, 201732-55-0, 202149-12-0, 203300-26-9, 210093-72-4, 865699-83-8, 1451188-70-7	Colorant, Intermediates, Monomer, Other Processing Aids		Automotive, Building & Construction, Food-contact plastics, Household items, furniture and other, Packaging, Textiles	1	15	Canada, China, EU, Japan, Malaysia, New Zealand, Nordic Countries, OECD, Philippines, Russia, South Korea, Taiwan, Thailand, United States, Vietnam	10000	100	100000	1000	110000		1					1	1	0.5	1	1	0.5	0		1	4	1	high	0		EU Food Contact Materials Positive List, USA Food Contact Materials Positive List (GRAS), Japan Food Contact Materials Postiive List	1	1	1	1
1278	'1066-33-7	Carbonic acid, ammonium salt (1:1)	ATRRKUHOCOJYRX-UHFFFAOYSA-N	InChI=1S/CH2O3.H3N/c2-1(3)4;/h(H2,2,3,4);1H3	[NH4+].OC([O-])=O	C H2 O3 . H3 N	79.0269		758-14-5, 114459-02-8, 861794-52-7	Blowing Agent, Colorant, Intermediates, Other Processing Aids		Agriculture, Building & Construction, Food-contact plastics, Household items, furniture and other, Packaging, Textiles	1	15	Canada, China, EU, Japan, Malaysia, Mexico, Nordic Countries, OECD, Philippines, South Korea, Taiwan, Thailand, Turkey, United States, Vietnam	100000	1000	1000000	1000	1100000		1					0	0	0	0	0	1	0		1	1	1	high	0		USA Food Contact Materials Positive List (GRAS), Japan Food Contact Materials Postiive List	1	0	1	1
1280	'1067-53-4	2,5,7,10-Tetraoxa-6-silaundecane, 6-ethenyl-6-(2-methoxyethoxy)-	WOXXJEVNDJOOLV-UHFFFAOYSA-N	InChI=1S/C11H24O6Si/c1-5-18(15-9-6-12-2,16-10-7-13-3)17-11-8-14-4/h5H,1,6-11H2,2-4H3	COCCO[Si](OCCOC)(OCCOC)C=C	C11 H24 O6 Si	280.134		59250-02-1, 609347-89-9, 947734-83-0, 1108196-61-7, 1637457-78-3, 1887095-48-8	Crosslinking Agent, Filler, Intermediates, Other Processing Aids		Building & Construction, Electrical and Electronic Equipment, Food-contact plastics, Packaging, Textiles	1	14	Canada, China, EU, Japan, Malaysia, New Zealand, Nordic Countries, OECD, Philippines, South Korea, Taiwan, Thailand, United States, Vietnam	10000	10	10000	1000	20000		1					1	0	0	1	0	0	0		1	1	1	high	0			0	0	0	0
1281	'107-03-9	1-Propanethiol	SUVIGLJNEAMWEG-UHFFFAOYSA-N	InChI=1S/C3H8S/c1-2-3-4/h4H,2-3H2,1H3	CCCS	C3 H8 S	76.0347			Other Processing Aids		Food-contact plastics, Packaging	1	12	Canada, China, EU, Mexico, Nordic Countries, OECD, Philippines, South Korea, Taiwan, Thailand, United States, Vietnam	100	0	-1	1000	1000		1					0	0	0	0	0	1	0		1	1	1	high	0		USA Food Contact Materials Positive List (GRAS)	1	0	1	0
1286	'107-46-0	Disiloxane, 1,1,1,3,3,3-hexamethyl-	UQEAIHBTYFGYIE-UHFFFAOYSA-N	InChI=1S/C6H18OSi2/c1-8(2,3)7-9(4,5)6/h1-6H3	C[Si](C)(C)O[Si](C)(C)C	C6 H18 O Si2	162.09		864719-97-1, 1463472-97-0	Colorant, Intermediates, Lubricant, Other Processing Aids		Agriculture, Building & Construction, Household items, furniture and other, Textiles	0	17	Canada, China, EU, Japan, Malaysia, Mexico, New Zealand, Nordic Countries, OECD, Philippines, Russia, South Korea, Taiwan, Thailand, Turkey, United States, Vietnam	100000	10	100000	1000	200000	0.5	0.5	0.5	0.5	0.5	0.5	0.5	0.5	0	0	1	1	0		1	2.5	1	high	0			0	0	0	0
1287	'107-83-5	Pentane, 2-methyl-	AFABGHUZZDYHJO-UHFFFAOYSA-N	InChI=1S/C6H14/c1-4-5-6(2)3/h6H,4-5H2,1-3H3	CCCC(C)C	C6 H14	86.1096	73513-42-5		Colorant, Lubricant, Other Processing Aids		Building & Construction, Electrical and Electronic Equipment	0	15	Canada, China, EU, Japan, Mexico, New Zealand, Nordic Countries, OECD, Philippines, South Korea, Taiwan, Thailand, Turkey, United States, Vietnam	100	10	1000000	1000	1000100		1					0.5	0	0	0.5	1	1	0		1	2.5	1	high	0			0	0	0	0
1297	'108-10-1	2-Pentanone, 4-methyl-	NTIZESTWPVYFNL-UHFFFAOYSA-N	InChI=1S/C6H12O/c1-5(2)4-6(3)7/h5H,4H2,1-3H3	CC(C)CC(C)=O	C6 H12 O	100.089		1338234-91-5	Catalyst, Colorant, Crosslinking Agent, Filler, Intermediates, Lubricant, Other Processing Aids		Agriculture, Automotive, Building & Construction, Electrical and Electronic Equipment, Food-contact plastics, Household items, furniture and other, Packaging, Textiles, Toys	1	15	Canada, China, EU, India, Malaysia, Mexico, Nordic Countries, OECD, Philippines, South Korea, Taiwan, Thailand, Turkey, United States, Vietnam	100000	10000	1000000	1000	1100000		1					0.5	0.5	0	0	1	0	0		1	1.5	1	high	1	USA - California Proposition 65	USA Food Contact Materials Positive List (GRAS), Japan Food Contact Materials Postiive List	1	0	1	1
1302	'108-39-4	Phenol, 3-methyl-	RLSSMJSEOOYNOY-UHFFFAOYSA-N	InChI=1S/C7H8O/c1-6-3-2-4-7(8)5-6/h2-5,8H,1H3	CC1=CC(O)=CC=C1	C7 H8 O	108.058			Biocide, Colorant, Intermediates, Monomer, Odor Agent, Other Processing Aids, Plasticizer	PA	Automotive, Electrical and Electronic Equipment, Food-contact plastics, Household items, furniture and other, Packaging, Textiles	1	15	Canada, China, EU, Japan, Malaysia, Mexico, Nordic Countries, OECD, Philippines, Russia, South Korea, Taiwan, Thailand, United States, Vietnam	100000	1000	100000	1000	200000		1					0.5	0.5	0	0.5	1	0.5	0		1	2.5	1	high	1	Korea REACH Authorisation	EU Food Contact Materials Positive List, USA Food Contact Materials Positive List (GRAS), Japan Food Contact Materials Postiive List	1	1	1	1
1303	'108-45-2	1,3-Benzenediamine	WZCQRUWWHSTZEM-UHFFFAOYSA-N	InChI=1S/C6H8N2/c7-5-2-1-3-6(8)4-5/h1-4H,7-8H2	NC1=CC(N)=CC=C1	C6 H8 N2	108.069		1266121-34-9, 1274866-89-5	Catalyst, Colorant, Crosslinking Agent, Filler, Initiator, Intermediates, Monomer, Other Processing Aids	Other - Rubber, PA, PUR	Automotive, Building & Construction, Electrical and Electronic Equipment, Food-contact plastics, Packaging	1	14	Canada, China, EU, Japan, Mexico, Nordic Countries, OECD, Philippines, Russia, South Korea, Taiwan, Thailand, United States, Vietnam	10000	10	100000	1000	110000		1					0.5	0	0.5	0.5	1	1	0		1	3	1	high	1	Korea REACH Authorisation	EU Food Contact Materials Positive List, USA Food Contact Materials Positive List (GRAS)	1	1	1	0
1304	'108-67-8	Benzene, 1,3,5-trimethyl-	AUHZEENZYGFFBQ-UHFFFAOYSA-N	InChI=1S/C9H12/c1-7-4-8(2)6-9(3)5-7/h4-6H,1-3H3	CC1=CC(C)=CC(C)=C1	C9 H12	120.094			Colorant, Crosslinking Agent, Filler, Lubricant, Other Processing Aids	Other - Bioplastic	Agriculture, Automotive, Building & Construction, Electrical and Electronic Equipment, Household items, furniture and other, Textiles, Toys	0	15	Canada, China, EU, Japan, Mexico, Nordic Countries, OECD, Philippines, Russia, South Korea, Taiwan, Thailand, Turkey, United States, Vietnam	100	100	10000	1000	10100		1					0	0	0	0	1	0.5	0		1	1.5	1	high	0		Japan Food Contact Materials Postiive List	1	0	0	1
1307	'108-87-2	Cyclohexane, methyl-	UAEPNZWRGJTJPN-UHFFFAOYSA-N	InChI=1S/C7H14/c1-7-5-3-2-4-6-7/h7H,2-6H2,1H3	CC1CCCCC1	C7 H14	98.1096			Colorant, Filler, Lubricant, Odor Agent, Other Processing Aids		Automotive, Building & Construction, Electrical and Electronic Equipment, Household items, furniture and other, Textiles, Toys	0	16	Canada, China, EU, India, Japan, Malaysia, Mexico, Nordic Countries, OECD, Philippines, South Korea, Taiwan, Thailand, Turkey, United States, Vietnam	10000	100	10000	1000	20000	0	0	0	0	0	0	0	0	0	0	0	1	0		1	1	1	high	0			0	0	0	0
1308	'108-90-7	Benzene, chloro-	MVPPADPHJFYWMZ-UHFFFAOYSA-N	InChI=1S/C6H5Cl/c7-6-4-2-1-3-5-6/h1-5H	ClC1=CC=CC=C1	C6 H5 Cl	112.008		50717-45-8	Colorant, Crosslinking Agent, Filler, Intermediates, Other Processing Aids	HDPE, Other - Bioplastic, PC, PET, PUR	Agriculture, Automotive, Building & Construction, Electrical and Electronic Equipment, Food-contact plastics, Household items, furniture and other, Packaging, Textiles, Toys	1	16	Canada, China, EU, Japan, Malaysia, Mexico, Nordic Countries, OECD, Philippines, Russia, South Korea, Taiwan, Thailand, Turkey, United States, Vietnam	10000	1000	100000	1000	110000		1					1	1	1	0.5	1	1	1		1	4.5	1	high	0		USA Food Contact Materials Positive List (GRAS), Japan Food Contact Materials Postiive List	1	0	1	1
1309	'108-91-8	Cyclohexanamine	PAFZNILMFXTMIY-UHFFFAOYSA-N	InChI=1S/C6H13N/c7-6-4-2-1-3-5-6/h6H,1-5,7H2	NC1CCCCC1	C6 H13 N	99.1048		143247-75-0, 157973-60-9, 1357848-57-7, 1533423-50-5	Antioxidant, Colorant, Crosslinking Agent, Intermediates, Light Stabilizer, Lubricant, Other Processing Aids	Other - Rubber	Building & Construction, Food-contact plastics, Packaging	1	16	Canada, China, EU, Japan, Malaysia, Mexico, Nordic Countries, OECD, Philippines, Russia, South Korea, Taiwan, Thailand, Turkey, United States, Vietnam	10000	100	100000	1000	110000		1					1	0	1	0.5	1	0.5	0		1	3	1	high	1	Korea REACH Authorisation	EU Food Contact Materials Positive List, USA Food Contact Materials Positive List (GRAS), Japan Food Contact Materials Postiive List	1	1	1	1
1310	'108-93-0	Cyclohexanol	HPXRVTGHNJAIIH-UHFFFAOYSA-N	InChI=1S/C6H12O/c7-6-4-2-1-3-5-6/h6-7H,1-5H2	OC1CCCCC1	C6 H12 O	100.089		2263936-22-5	Colorant, Filler, Odor Agent, Other Processing Aids, Plasticizer, Solvent	PA	Agriculture, Automotive, Building & Construction, Electrical and Electronic Equipment, Food-contact plastics, Packaging, Textiles, Toys	1	15	Canada, China, EU, Japan, Mexico, Nordic Countries, OECD, Philippines, Russia, South Korea, Taiwan, Thailand, Turkey, United States, Vietnam	10000	10	1000000	1000	1010000		1					0.5	0	0	0.5	1	0.5	0		1	2	1	high	0		USA Food Contact Materials Positive List (GRAS), Japan Food Contact Materials Postiive List	1	0	1	1
1311	'108-94-1	Cyclohexanone	JHIVVAPYMSGYDF-UHFFFAOYSA-N	InChI=1S/C6H10O/c7-6-4-2-1-3-5-6/h1-5H2	O=C1CCCCC1	C6 H10 O	98.0732			Biocide, Colorant, Crosslinking Agent, Filler, Intermediates, Lubricant, Odor Agent, Other Processing Aids	ABS, Other - Rubber, PA, PVC	Agriculture, Automotive, Building & Construction, Electrical and Electronic Equipment, Food-contact plastics, Household items, furniture and other, Hygiene and Medical items, Packaging, Textiles, Toys	1	16	Canada, China, EU, India, Japan, Malaysia, Mexico, Nordic Countries, OECD, Philippines, South Korea, Taiwan, Thailand, Turkey, United States, Vietnam	10000000	10000	10000000	1000	20000000		1					0.5	0.5	0.5	0.5	1	0	0		1	2.5	1	high	0		USA Food Contact Materials Positive List (GRAS), Japan Food Contact Materials Postiive List	1	0	1	1
1322	'109-72-8	Lithium, butyl-	MZRVEZGGRBJDDB-UHFFFAOYSA-N	InChI=1S/C4H9.Li/c1-3-4-2;/h1,3-4H2,2H3;	[Li]CCCC	C4 H9 Li	64.0864		52948-61-5	Intermediates		Building & Construction, Food-contact plastics, Packaging	1	13	Canada, China, EU, Japan, Mexico, Nordic Countries, OECD, Philippines, South Korea, Taiwan, Thailand, United States, Vietnam	10	0	-1	1000	1000		1					1	0	0	1	0.5	0	0		1	1.5	1	high	0		USA Food Contact Materials Positive List (GRAS)	1	0	1	0
1323	'109-73-9	1-Butanamine	HQABUPZFAYXKJW-UHFFFAOYSA-N	InChI=1S/C4H11N/c1-2-3-4-5/h2-5H2,1H3	CCCCN	C4 H11 N	73.0891		42939-72-0, 50929-03-8, 85404-21-3	Colorant, Filler, Other Processing Aids, Plasticizer		Building & Construction	0	14	Canada, China, EU, Japan, Malaysia, Mexico, Nordic Countries, OECD, Philippines, South Korea, Taiwan, Thailand, United States, Vietnam	10	10	100000	1000	100010		1					1	0	0	1	1	0.5	0		1	2.5	1	high	0		USA Food Contact Materials Positive List (GRAS)	1	0	1	0
1324	'109-89-7	Ethanamine, N-ethyl-	HPNMFZURTQLUMO-UHFFFAOYSA-N	InChI=1S/C4H11N/c1-3-5-4-2/h5H,3-4H2,1-2H3	CCNCC	C4 H11 N	73.0891		1637232-73-5	Colorant, Intermediates, Lubricant, Other Processing Aids	Other - Rubber, PUR	Agriculture, Automotive, Food-contact plastics, Packaging, Textiles	1	14	Canada, China, EU, Japan, Mexico, Nordic Countries, OECD, Philippines, South Korea, Taiwan, Thailand, Turkey, United States, Vietnam	1000	100	100000	1000	101000		1					0	0	0	0	1	0.5	0		1	1.5	1	high	0		USA Food Contact Materials Positive List (GRAS)	1	0	1	0
1329	'110-15-6	Butanedioic acid	KDYFGRWQOYBRFD-UHFFFAOYSA-N	InChI=1S/C4H6O4/c5-3(6)1-2-4(7)8/h1-2H2,(H,5,6)(H,7,8)	OC(=O)CCC(O)=O	C4 H6 O4	118.027		623158-99-6, 2087491-34-5	Biocide, Colorant, Filler, Intermediates, Lubricant, Monomer, Odor Agent, Other Processing Aids, Plasticizer	PA, PET, PUR	Electrical and Electronic Equipment, Food-contact plastics, Hygiene and Medical items, Packaging	1	15	Canada, China, EU, Malaysia, Mexico, Nordic Countries, OECD, Philippines, Russia, South Korea, Taiwan, Thailand, Turkey, United States, Vietnam	100000	10	100000	1000	200000		1					1	1	1	0	0	0	0		1	2	1	high	0		EU Food Contact Materials Positive List, USA Food Contact Materials Positive List (GRAS), Japan Food Contact Materials Postiive List	1	1	1	1
1333	'110-25-8	Glycine, N-methyl-N-[(9Z)-1-oxo-9-octadecen-1-yl]-	DIOYAVUHUXAUPX-KHPPLWFESA-N	InChI=1S/C21H39NO3/c1-3-4-5-6-7-8-9-10-11-12-13-14-15-16-17-18-20(23)22(2)19-21(24)25/h10-11H,3-9,12-19H2,1-2H3,(H,24,25)/b11-10-	CCCCCCCC\C=C/CCCCCCCC(=O)N(C)CC(O)=O	C21 H39 N O3	353.293		57368-03-3, 2230958-89-9	Antistatic Agent, Light Stabilizer, Lubricant		Automotive, Building & Construction, Electrical and Electronic Equipment, Food-contact plastics, Packaging	1	13	Canada, China, EU, Japan, Mexico, Nordic Countries, OECD, Philippines, South Korea, Taiwan, Turkey, United States, Vietnam		10	-1	1000	1000		1					0	0	0	0	0	1	0		1	1	1	high	0		USA Food Contact Materials Positive List (GRAS), Japan Food Contact Materials Postiive List	1	0	1	1
1336	'110-44-1	2,4-Hexadienoic acid, (2E,4E)-	WSWCOQWTEOXDQX-MQQKCMAXSA-N	InChI=1S/C6H8O2/c1-2-3-4-5-6(7)8/h2-5H,1H3,(H,7,8)/b3-2+,5-4+	C\C=C\C=C\C(O)=O	C6 H8 O2	112.052	22500-92-1	91751-55-2, 1197240-56-4	Biocide, Other Processing Aids		Automotive, Building & Construction, Electrical and Electronic Equipment, Food-contact plastics, Packaging, Textiles	1	15	Canada, China, EU, Japan, Mexico, Nordic Countries, OECD, Philippines, Russia, South Korea, Taiwan, Thailand, Turkey, United States, Vietnam	10000	100	10000	1000	20000		1					0	0	0	0	0	1	0		1	1	1	high	0		EU Food Contact Materials Positive List, USA Food Contact Materials Positive List (GRAS), Japan Food Contact Materials Postiive List	1	1	1	1
[truncated: 815 more rows]

## Sheet: S5- Repeating units in LC-MS 
Common interference occurs with repeating units in the positive mode of LC-MS.
Mass difference	Origin
14.0157	-[CH2]-, alkane chains, waxes, fatty acids, methylation
15.9949	O, oxidation
18.0106	H2O, water clusters
28.0313	-[C2H4]-, natural alkane chains such as fatty acids
32.0262	CH3OH, methanol clusters
41.0265	CH3CN, acetonitrile clusters
42.047	-[C3H6]-, propyl repeating units, propylation
44.0262	-[C2H4O]-; polyethylene glycol, PEG, and related components such as Tritons and Tween buffers
49.9968	-[CF2]-, from perfluoro compounds
53.0032	NH4Cl salt adducts/clusters
56.0626	-[C4H8]-, butyl repeating units, butylation
57.9586	NaCl, sodium chloride clusters
[truncated: 30 more rows]

## Sheet: S6 - End group database (OEGDB)
EG.Name	EG.SMILES	EG.formula	EG.mass
[truncated: 7 more rows]

[truncated: 2 more sheets: S7 - OEGDB-env, S8 - OEGDB-bio]
